# Supplementary material for: A Novel Method for Predicting the Human Inherent Clearance and Its Application in the Study of the Pharmacokinetics and Drug–Drug Interaction between Azidothymidine and Fluconazole Mediated by UGT Enzyme
Source: Pharmaceutics. 2021 Oct 19;13(10):1734. doi: 10.3390/pharmaceutics13101734 (PMC8538957; doi:10.3390/pharmaceutics13101734)
Supplement: Supplementary file 1 [file pharmaceutics-13-01734-s001.zip › Supplementary Materials/Table S1.xlsx]

## Sheet: Prediction data
ID	Name	Set	Experimental value(CLint)	RF	ADA	XG	LGB	Consensus (average)	Smile
1	CHEMBL250689	test	0.01617	89.61748471649344	25.0	63.12287902832031	29.35083796107916	51.772800426473225	CC(=O)c1cccc(NC(=O)N[C@@H]2CCCC[C@H]2CN3CCC[C@@H](Cc4ccc(F)cc4)C3)c1
2	CHEMBL304053	train	0.0165	76.12893221212119	23.0	77.43549346923828	26.847143087462985	50.852892192205616	CC(C)(O)CCC(C[C@H](O)[C@H](Cc1ccccc1F)NC(=O)c2cnc3ccccc3n2)C(=O)N
3	CHEMBL4084769	train	0.01667	36.317830889668414	15.944444444444445	0.7982840538024902	-4.482477570874644	12.144520454260176	Cc1cccc(n1)c2cc(Nc3ccn(C)n3)nc4[nH]cc(C#N)c24
4	CHEMBL3747287	test	0.017	40.714631490338235	19.60450381679389	25.20171546936035	1.2537985596197139	21.693662334028048	OC1(CNC(=O)c2cn(Cc3ccc(cc3)n4cccn4)c5cccnc25)CCC1
5	CHEMBL2348858	train	0.017	39.341077730340864	20.0	31.37035369873047	53.57467472757498	36.071526539161574	Cn1nc(c2cc(ccc12)CO)-c1cnc2[nH]cc(c2n1)C(=O)NC(C)(C)C
6	CHEMBL2348857	train	0.017	42.71063047290262	21.727272727272727	18.438201904296875	42.7430391663065	31.404786067694683	Cn1nc(c2ccc(cc12)F)-c1cnc2[nH]cc(c2n1)C(=O)N[C@@H]1C[C@@H](O)C1
7	CHEMBL3745995	train	0.018	68.77499095820906	19.0	35.694175720214844	46.225199229659495	42.42359147702085	O[C@H]1CCCC[C@@H]1NC(=O)c2cn(Cc3ccc(cc3)C#N)c4cccnc24
8	CHEMBL2346686	test	0.018	36.32384260792691	21.916666666666668	25.03228759765625	27.809676624337442	27.770618374146817	Cn1nc(c2cc(ccc12)OC(F)F)-c1cnc2[nH]cc(c2n1)C(=O)NC(C)(C)C
9	CHEMBL2103830	train	0.018	60.79247949603557	28.9916049382716	25.126073837280273	23.692860797021797	34.650754767152314	COc1cc(cc(c1OC)OC)Nc1ncc(c(n1)Nc1ccc2c(n1)N(COP(=O)(O)O)C(=O)C(C)(C)O2)F
10	CHEMBL484127	train	0.0181	32.37241094936949	18.04	14.013195037841797	20.571297223204596	21.24922580260397	C[C@@H]1CN(Cc2ccc(cc2)-c2cccc(c2)F)C(=O)O1
11	CHEMBL485331	train	0.0186	18.690093798866954	19.5	16.224445343017578	13.705581224824886	17.030030091677354	COc1ccc(cc1)-c1ccc(cc1)CN1C[C@@H](C)OC1=O
12	CHEMBL484128	train	0.0187	46.84566734920633	22.878961038961066	30.608552932739258	60.02156930696558	40.088687656968055	C[C@@H]1CN(Cc2ccc(cc2)-c2ccccc2)C(=O)O1
13	CHEMBL519341	train	0.0187	3.221762701568574	0.6443956250000001	1.174074649810791	10.913533164893744	3.988441535318277	C[C@@H]1CN(Cc2ccc(cc2)-c2ccccc2Cl)C(=O)O1
14	CHEMBL484126	train	0.0187	4.460514335494359	17.8	3.8687798976898193	12.865513949890216	9.7487020457686	C[C@@H]1CN(Cc2ccc(cc2)-c2ccccc2F)C(=O)O1
15	CHEMBL485528	train	0.0187	46.27825084006148	22.600000000000005	52.39677429199219	62.38237919372173	45.914351081443854	CCOc1ccccc1-c1ccc(cc1)CN1C[C@@H](C)OC1=O
16	CHEMBL485330	train	0.0187	16.820331762234627	7.0	4.453225135803223	-14.721732464736753	3.387956108325274	COc1cccc(c1)-c1ccc(cc1)CN1C[C@@H](C)OC1=O
17	CHEMBL520677	train	0.0187	28.501364049823383	21.725	24.103515625	22.742059698905848	24.26798484343231	COc1ccccc1-c1ccc(cc1)CN1C[C@@H](C)OC1=O
18	CHEMBL3706620	train	0.019	26.94798735714287	2.2	9.030740737915039	-7.117031605249847	7.765424122452015	CC(C)(N1CCN(C[C@@H](O)C[C@@H](Cc2ccccc2)C(=O)N[C@@H]3[C@H](O)COc4ccccc34)[C@@H](C1)C(=O)NCC(F)(F)F)c5oc(cc5)c6ccncc6
19	CHEMBL2347995	train	0.019	37.64135694453591	11.335774647887316	53.1050910949707	48.15768766005922	37.55997758686328	CC(C)NC(=O)c1c[nH]c2ncc(nc12)-c1nn(c2c1CC(C)(C)CC2)C
20	CHEMBL3971067	train	0.02	32.52456426924704	23.459681884057957	5.239762783050537	52.344061664093346	28.39201765011222	CC(C)n1cc(nn1)c2cc(cnc2N)c3ccc(CN4CCOCC4)cc3
21	CHEMBL3401121	train	0.02	0.647575720648796	8.136888888888892	0.3214908540248871	-0.705033681811186	2.1002304454378473	C[C@H]1COCCN1C2=NC(=CC(=O)N2C)c3ccncc3F
22	CHEMBL3401132	test	0.02	8.674230940720943	15.015274725274727	1.6828677654266357	-8.760989049162038	4.152846095565066	CN1C(=O)C=C(N=C1N2CCO[C@@H]3COC[C@@H]23)c4ccncc4F
23	CHEMBL2347417	train	0.02	41.826902644286164	26.82272727272727	56.061546325683594	52.23091062068072	44.23552171584444	CC(C)(C)NC(=O)c1c[nH]c2ncc(nc12)-c1nn(c2ccc(cc12)OC(F)F)CCCN1CC(C1)C#N
24	CHEMBL2347418	train	0.02	32.68844704517632	25.863157894736844	31.05074119567871	44.12856580350864	33.43272798477513	CC(C)(C)NC(=O)c1c[nH]c2ncc(nc12)-c1nn(c2ccc(cc12)OC(F)F)CCCN1CCOCC1
25	CHEMBL4065198	test	0.02167	0.5597886157150868	18.333333333333332	0.4322577118873596	0.7991576826327464	5.031134335892131	Cc1ccnc(c1)c2cc(Nc3ccn(C)n3)nc4[nH]cc(C#N)c24
26	CHEMBL2208156	test	0.022	48.27804955396653	32.29999999999998	-3.1052968502044678	0.9768410915726318	19.61239844883367	O=C1N(C=C(C=C1c2ccccc2C#N)c3ccccc3)c4ccccc4
27	CHEMBL79236	test	0.022	36.09621566629471	8.0	24.162458419799805	49.547761195672194	29.451608820441677	CC(C)(N1CCN(C[C@@H](O)C[C@@H](Cc2ccccc2)C(=O)N[C@@H]3[C@H](O)COc4ccccc34)[C@@H](C1)C(=O)NCC(F)(F)F)c5oc6ccncc6c5
28	CHEMBL3961632	train	0.025	27.649662927128425	18.0	15.782851219177246	-0.272318289919702	15.290048964096492	Cc1cccc(c1)c2cc(N)nc3[nH]cc(C#N)c23
29	CHEMBL1672054	train	0.025	70.92966450513507	28.0	40.22910690307617	90.20054407004088	57.33982886956303	C[C@@H](N(C)C(=O)N1CC[C@@H](C[C@@H]1c2ccc(F)cc2C)N3CCN(CC3)C(=O)C)c4cc(cc(c4)C(F)(F)F)C(F)(F)F
30	CHEMBL3706613	train	0.027	0.6736616547619046	2.0458000000000003	-0.2297319769859314	-0.17915039601122745	0.5776448204411866	CC(C)(N1CCN(C[C@@H](O)C[C@@H](Cc2ccccc2)C(=O)N[C@@H]3[C@H](O)COc4ccccc34)[C@@H](C1)C(=O)NCC(F)(F)F)c5oc(cn5)c6cccnc6
31	CHEMBL3798228	train	0.02833	5.372604424475588	9.0	0.19755074381828308	0.4838829923575566	3.763509540162857	F[C@H]1CCN(C1)C(=O)CN2CCN(C2=O)c3cccc4c3cnn4c5ccccc5F
32	CHEMBL2208151	train	0.029	33.883765925132714	22.0	51.37922668457031	75.29748057421945	45.64011829598061	O=C1N(C=C(C=C1c2ccsc2C#N)c3ccccn3)c4cccnc4
33	CHEMBL3798039	train	0.03	28.95152367519864	13.245024924242424	50.35494613647461	44.486731671495185	34.259556601852715	F[C@H]1CCN(C1)C(=O)CN2CCN(CC2=O)c3cccc4c3cnn4c5ccccc5F
34	CHEMBL3401118	train	0.03	2.751235749375283	8.3	-0.18970227241516113	1.331018214499483	3.0481379228649015	C[C@@H]1COCCN1C2=NC(=CC(=O)N2C)c3ccncc3F
35	CHEMBL3747724	train	0.031	72.3767348314568	31.666666666666668	118.24130249023438	136.26118625643699	89.6364725611987	Cn1ccc(NC(=O)c2cn(Cc3ccc(cc3)n4cccn4)c5cccnc25)n1
36	CHEMBL594752	train	0.0313	56.02765125654927	27.6	56.94636535644531	73.1099990626465	53.421003918910266	Cc1cc(Nc2ccccc2)nc(NCc3ccc4OCOc4c3)n1
37	CHEMBL296035	train	0.03165	20.322884109116107	24.161290322580644	31.519102096557617	21.13776408071839	24.28526015224319	CCc1cccc2cc(oc12)C(O)CNC(C)(C)C
38	CHEMBL3797267	train	0.03167	68.12655422512502	28.6	175.6392822265625	148.4817019021236	105.21188458845279	Fc1ccccc1n2ncc3c(cccc23)N4CCN(CC(=O)N5CCCC5)C4=O
39	CHEMBL66159	train	0.0327	160.40394363664595	52.250458333333334	163.27012634277344	207.5646150875857	145.8722858500846	CC(C)(F)CCC(C[C@H](O)[C@H](Cc1ccccc1)NC(=O)c2cnc3ccccc3n2)C(=O)NN
40	CHEMBL1083331	train	0.03283	0.9710596121993811	8.0	-0.1312313675880432	-2.491597584601202	1.587057665002534	COc1ccc(c2ccncc2)c3cc(oc13)C(=O)Nc4ccncc4
41	CHEMBL3799943	train	0.03333	3.239900649125464	8.03135734072025	-0.3798491954803467	-4.791239309744821	1.5250423711551369	F[C@@H]1CCN(C1)C(=O)CN2CCN(C2=O)c3cccc4c3cnn4c5ccccc5F
42	CHEMBL3799838	train	0.03333	140.7235128376371	46.43333333333333	66.9354248046875	96.3183091819883	87.60264503941156	Fc1ccccc1n2ncc3c(cccc23)N4CCN(Cc5occn5)C4=O
43	CHEMBL359803	train	0.034	68.51701175936489	19.76035087719298	15.27723503112793	35.47264894927777	34.75681165424089	C[C@H](O)[C@@H](CCc1cccc2nc(oc12)c3ccc(Cl)cc3)n4cnc(c4)C(=O)N
44	CHEMBL312238	train	0.034	65.67175942857143	33.0	81.67823028564453	30.92555122697578	52.818885235297934	CC(C)(C)NC(=O)[C@@H]1CN(CCN1C[C@@H](O)C[C@@H](Cc2ccccc2)C(=O)N[C@@H]3[C@H](O)COc4ccccc34)C(C)(C)c5oc6ccncc6c5
45	CHEMBL3961481	train	0.035	0.6934707843328151	7.306958947368416	0.222417414188385	1.4638621637839484	2.421677327418391	Cc1cccc(n1)c2cc(Nc3nn(C)cc3C)nc4[nH]cc(C#N)c24
46	CHEMBL3706622	train	0.035	23.88893296925169	7.0	14.0601167678833	23.69309974776776	17.160537371225686	CC(C)(N1CCN(C[C@@H](O)C[C@@H](Cc2ccccc2)C(=O)N[C@@H]3[C@H](O)COc4ccccc34)[C@@H](C1)C(=O)NCC(F)(F)F)c5oc(cn5)c6cnccc6Cl
47	CHEMBL302533	train	0.035	47.77710865634768	19.0	15.295502662658691	72.3377618346286	38.60259328840874	NC(=O)C(C[C@H](O)[C@H](Cc1ccccc1)NC(=O)c2cnc3ccccc3n2)C4CCC(F)(F)CC4
48	CHEMBL363731	train	0.036	25.275359703109025	21.92	18.446243286132812	17.522173049306485	20.790944009637084	CC1=C(C(=O)N(C[C@H](N)c2ccccc2)C(=O)N1Cc3c(F)cccc3F)c4csc(n4)c5ccc(C)cc5
49	CHEMBL3799205	train	0.03667	47.500889026688725	20.0	58.773868560791016	19.60136646477282	36.46903101306314	Fc1ccccc1n2ncc3c(cccc23)N4CCN(CC(=O)NC5CC5)C4=O
50	CHEMBL3798752	train	0.03667	11.822171240495761	16.25	12.525325775146484	-17.84542309138154	5.688018481065177	O[C@H]1CCN(C1)C(=O)CN2CCN(C2=O)c3cccc4c3cnn4c5ccccc5F
51	CHEMBL1085514	train	0.03717	0.9710596121993811	8.0	0.0792485773563385	-2.1881425152918923	1.715541418565957	COc1ccc(c2ccccn2)c3cc(oc13)C(=O)Nc4ccncc4
52	CHEMBL3746322	train	0.038	4.551759352357614	20.014285714285712	0.4888533353805542	1.3518006784005763	6.601674770106114	O[C@H]1CCCC[C@@H]1NC(=O)c2nn(Cc3ccc(cc3)n4cccn4)c5ccccc25
53	CHEMBL3933899	train	0.03833	36.318472489668416	15.944444444444445	0.7982840538024902	-4.960008571190991	12.02529810418109	Cc1cncc(c1)c2cc(Nc3ccn(C)n3)nc4[nH]cc(C#N)c24
54	CHEMBL3401129	train	0.04	21.653096332029737	8.9	3.061455249786377	7.710476592759593	10.331257043643927	CN1C(=O)C=C(N=C1N2CCO[C@@H]3CCC[C@@H]23)c4ccncc4F
55	CHEMBL1083332	train	0.04067	76.46774407295366	56.08932038834952	80.46495056152344	71.75967587563596	71.19542272461564	COc1ccc(c2ccncc2)c3cc(oc13)C(=O)Nc4ccc(Cn5ccnc5)cc4
56	CHEMBL3798774	train	0.04167	29.41391470049348	22.0	39.39377975463867	18.059249475217893	27.21673598258751	Cc1cncc(CN2CCN(C2=O)c3cccc4c3cnn4c5ccccc5F)n1
57	CHEMBL3746599	train	0.042	16.078465532640585	19.12462263888887	7.282704830169678	46.524131081198476	22.252481020724403	O[C@H]1CCCC[C@@H]1NC(=O)c2cn(Cc3ccc(cc3)n4cccn4)c5ccccc25
58	CHEMBL3798320	train	0.04333	43.35811534787107	21.866885245901642	39.07961654663086	30.399121869805427	33.67593475255225	CC(C)(O)CC(=O)N1C[C@H]2CN(C(=O)[C@H]2C1)c3cccc4c3cnn4c5ccccc5F
59	CHEMBL2208178	train	0.045	38.17534510096833	10.0	18.24674415588379	64.30380771672554	32.68147424339442	O=C1N(C=C(C=C1c2ccccc2)c3ccccc3)c4ccccc4
60	CHEMBL93560	train	0.045	41.242124185233976	24.325163636363627	48.32146453857422	5.2878258603334505	29.79414455512632	C[C@H](O)[C@@H](CCc1cccc2ccccc12)n3cnc(c3)C(=O)N
61	CHEMBL183938	train	0.046	22.53557195447662	28.5	15.7726411819458	24.96387171387974	22.94302121257554	CC1=C(C(=O)N(C[C@H](N)c2ccccc2)C(=O)N1Cc3c(F)cccc3F)c4csc(n4)c5ccc(Cl)cc5
62	CHEMBL4092521	train	0.04667	5.645884427596123	9.20798625	3.1281754970550537	4.421204500235847	5.600812668721755	Cc1cccc(n1)c2cc(Nc3nn(C)cc3Cl)nc4[nH]cc(C#N)c24
63	CHEMBL3746377	train	0.047	43.284047702813766	16.871185922746776	53.078468322753906	24.39290851077078	34.4066526147713	Cn1ccc(n1)c2ccc(Cn3cc(C(=O)N[C@H]4CCCC[C@@H]4O)c5ncccc35)cc2
64	CHEMBL306457	test	0.0477	114.17459560302558	34.17272151898731	86.0494384765625	174.98130589744386	102.34451537400481	NC(=O)C(C[C@H](O)[C@H](Cc1ccccc1)NC(=O)c2cnc3ccccc3n2)C4(O)CCCCC4
65	CHEMBL4063115	train	0.04833	36.31862248966842	15.944444444444445	0.7982840538024902	-4.960008571190991	12.025335604181091	Cc1cc(ccn1)c2cc(Nc3ccn(C)n3)nc4[nH]cc(C#N)c24
66	CHEMBL115	train	0.05	133.122328492808	61.075	82.0293197631836	113.82977251143103	97.51410519185566	CC(C)(C)NC(=O)[C@@H]1CN(Cc2cccnc2)CCN1C[C@@H](O)C[C@@H](Cc3ccccc3)C(=O)N[C@@H]4[C@H](O)Cc5ccccc45
67	CHEMBL1083330	train	0.053	76.46774407295366	56.08932038834952	79.8287353515625	72.29649854142068	71.17057458857158	COc1ccc(c2cccnc2)c3cc(oc13)C(=O)Nc4ccc(Cn5ccnc5)cc4
68	CHEMBL3937852	test	0.054	49.27680471153846	56.4	36.61408233642578	105.63877449502225	61.98241538574662	CC(=C)[C@@H]1CC[C@@]2(CC[C@]3(C)[C@H](CC[C@@H]4[C@@]5(C)CC[C@H](OC(=O)CC(C)(C)C(=O)O)C(C)(C)[C@@H]5CC[C@@]34C)[C@@H]12)C(=O)N6CCN(CC6)C(=O)\C=C\c7ccc8OCOc8c7
69	CHEMBL595700	train	0.0552	22.763089523504274	23.0	21.42232894897461	19.84711055720834	21.758132257421806	Cc1cc(Nc2ccccc2)nc(NCc3ccccc3)n1
70	CHEMBL610731	train	0.0562	10.243134868330829	23.0	15.518189430236816	-2.9949248646294024	11.44159985848456	FC(F)(F)c1cc(Nc2ccncc2)nc(NCc3ccncc3)n1
71	CHEMBL1083329	train	0.057	0.9000762058657528	9.955555555555556	-0.6575793027877808	1.3424523125761807	2.885126192802427	COc1ccc(c2cccnc2)c3cc(oc13)C(=O)Nc4ccncc4
72	CHEMBL3799939	train	0.05833	42.65275102918683	31.0	20.874794006347656	36.69915008165179	32.80667377929657	CC(C)(O)CC(=O)N1CC[C@H]2CN(C(=O)[C@@H]12)c3cccc4c3cnn4c5ccccc5F
73	CHEMBL3745973	train	0.059	3.116907265773347	17.663692095238098	-0.16909927129745483	-4.532442242027672	4.019764461921579	O[C@H]1CCCC[C@@H]1NC(=O)c2cn(Cc3ccc(cc3)n4cccn4)c5cccnc25
74	N-methylformamide (NMF)	train	0.06	4.259000000000002	3.0	-12.779767990112305	122.45228957619273	29.232880396520105	CNC=O
75	CHEMBL3797498	train	0.06333	52.66434138689272	14.77	40.72719192504883	41.08304055714777	37.31114346727233	Fc1ccccc1n2ncc3c(cccc23)N4CCN(C4=O)c5ccncc5
76	CHEMBL4101218	train	0.06333	0.2812117378461519	8.332467532467534	0.7948180437088013	4.288464840413811	3.4242405386090744	Cc1cncc(c1)c2cc(Nc3nn(C)cc3C)nc4[nH]cc(C#N)c24
77	CHEMBL3799551	train	0.065	58.00075028867681	20.229999999999997	53.121002197265625	38.35755253374157	42.427326254921	CC(C)CC(=O)CN1CCN(C1=O)c2cccc3c2cnn3c4ccccc4F
78	CHEMBL3798073	train	0.06667	20.20580561122586	8.46133333333333	14.293305397033691	-4.721090287512877	9.55983851352	Fc1ccc(cc1)n2nc(OCCN3CCNC3=O)c4cc(F)ccc24
79	CHEMBL3799790	train	0.06833	29.03777317028804	20.0	29.153852462768555	20.6432603565822	24.708721497409698	F[C@H]1CCCN(C1)C(=O)CN2CCN(C2=O)c3cccc4c3cnn4c5ccccc5F
80	CHEMBL4100265	train	0.07	5.6461010275961225	8.962575681818182	3.1100523471832275	4.421204500235847	5.534983389208344	Cc1cncc(c1)c2cc(Nc3nn(C)cc3Cl)nc4[nH]cc(C#N)c24
81	CHEMBL3401115	train	0.07	34.47754455260942	9.0	53.82109832763672	37.92145541539798	33.805024573911034	CC(C)C1CN(CCO1)C2=NC(=CC(=O)N2C)c3ccncc3F
82	CHEMBL594534	train	0.07	44.610954960317386	20.0	8.948234558105469	38.43069948297748	27.997472250350086	Cc1cc(Nc2ccccc2)nc(NCc3ccccn3)n1
83	CHEMBL3939513	train	0.075	32.45606107684294	18.0	18.883272171020508	-3.4914721848584773	16.461965265751243	Cn1ccc(Nc2cc(c3ccccc3)c4c(c[nH]c4n2)C#N)n1
84	CHEMBL3919862	train	0.07833	0.3023171731331441	7.2	-0.42609673738479614	-0.6097541886047366	1.6166165617859027	Cc1cc(ccn1)c2cc(Nc3nn(C)cc3C)nc4[nH]cc(C#N)c24
85	CHEMBL4077034	test	0.08	0.5946268835485246	18.200000000000017	0.3525381088256836	1.3860705292048554	5.13330888039477	Cc1cc(ccn1)c2cc(Nc3nn(C)cc3Cl)nc4[nH]cc(C#N)c24
86	CHEMBL64148	train	0.084	94.81288080189404	57.0	88.59341430664062	92.23837624562057	83.1611678385388	COc1cccc(c1)C2=C(C)N(Cc3c(F)cccc3F)C(=O)N(CCNCCc4ccccn4)C2=O
87	CHEMBL3746904	test	0.087	207.6242243149873	28.0	136.63487243652344	84.64920291910762	114.22707491765458	O[C@H]1CCCC[C@@H]1NC(=O)c2cn(Cc3ccc4ncccc4c3)c5cccnc25
88	CHEMBL3798258	train	0.09833	39.65975883238878	19.0	32.28640365600586	63.18427945465498	38.532610485762405	CC(C)(C)OC(=O)N1CCN(C1=O)c2cccc3c2cnn3c4ccccc4F
89	CHEMBL594979	train	0.099	8.352006541445217	20.39217518248175	3.5106096267700195	10.766620587473207	10.755352984542549	FC(F)(F)c1cc(Nc2ccccc2)nc(NCc3ccccn3)n1
90	CHEMBL4104344	train	0.1	51.329651688361935	22.333333333333332	41.63530731201172	70.61057298168416	46.47721632884779	Cc1ccc(cc1)c2cnc(N)c(c2)c3cnn(C)c3
91	CHEMBL98	train	0.1	74.7799555	30.0	93.05076599121094	85.28054204992259	70.77781588528339	ONC(=O)CCCCCCC(=O)Nc1ccccc1
92	CHEMBL1797411	test	0.1	52.294176448082155	24.096500000000002	59.29063415527344	46.11115030026389	45.44811522590487	Cc1onc(c1CC(=O)NCc2ccc(OCC(F)(F)F)nc2)c3c(C)cccc3C
93	CHEMBL1797401	train	0.1	44.86325014719453	15.165206278026918	39.9169921875	37.68504347780922	34.40762302263266	Cc1onc(c1NC(=O)NCc2c(F)cccc2Cl)c3c(C)cccc3C
94	CHEMBL3745962	test	0.104	56.73582481329693	23.66086956521739	30.177270889282227	8.017220928609706	29.647796549101564	O[C@H]1CCCC[C@@H]1NC(=O)c2cn(Cc3ccc(cc3)c4cncnc4)c5cccnc25
95	CHEMBL2208176	test	0.114	4.354095333333334	0.57104	25.752513885498047	15.046507473950948	11.431039173195582	O=C1C=CC(=CN1c2ccccc2)c3ccccc3
96	CHEMBL3798493	train	0.11667	34.849668409123076	17.989365655976687	28.297870635986328	19.65703956906499	25.19848606753777	Fc1ccc2c(c1)c(OCC(=O)N3CCOCC3)nn2c4ccccc4F
97	CHEMBL93280	train	0.123	84.67451950931537	54.8732970027248	60.9792594909668	71.03047750467604	67.88938837692075	Cn1c(CCC(=O)Nc2ccc3ccn(CC[C@H](CO)n4cnc(c4)C(=O)N)c3c2)nc5ccccc15
98	CHEMBL114756	train	0.133	3.1654474728456905	15.058615384615385	0.1972198784351349	2.2345716425792648	5.163963594618869	O[C@@H](C[C@@H](Cc1ccccc1)C(=O)N[C@@H]2[C@H](O)COc3ccccc23)CN4CCN(Cc5oc(cc5)c6ccncc6)C[C@H]4C(=O)NCC(F)(F)F
99	CHEMBL3747254	train	0.133	92.91391020222902	51.0	114.66036987304688	118.88041382506216	94.36367347508451	O=C(NC[C@@H]1CCCO1)c2cn(Cc3ccc(cc3)n4cccn4)c5cccnc25
100	CHEMBL3798393	test	0.13667	24.598476037703605	12.759533799533804	17.58485221862793	37.02124373672983	22.991026448148794	NC(=O)CN1CCN(C1=O)c2cccc3c2cnn3c4ccccc4F
101	CHEMBL3747037	test	0.14	41.49102884897016	24.267462686567175	19.241670608520508	62.126174628875106	36.781584193233236	O[C@H]1CCCC[C@@H]1NC(=O)c2cn(Cc3ccc(cc3)n4cc(cn4)c5ccncc5)c6cccnc26
102	CHEMBL3969077	train	0.14167	34.0713047264794	19.12462263888887	3.6102564334869385	-1.193918122713118	13.903066419035522	Cc1cccc(c1)c2cc(Nc3ccn(C)n3)nc4[nH]cc(C#N)c24
103	CHEMBL3800304	train	0.15	23.641811292838653	19.100000000000005	29.71263313293457	-2.8884877309449064	17.391489173707082	Fc1ccc(c(F)c1)n2nc(OCCN3CCNC3=O)c4cc(F)ccc24
104	CHEMBL3797315	train	0.15	47.40605741214286	21.0	76.60202026367188	82.1784367644628	56.79662861006938	Fc1ccc2c(c1)c(OCCn3ccnc3)nn2c4ccccc4F
105	CHEMBL1085515	train	0.1535	23.517599762358344	15.740170909090907	25.307170867919922	-3.0861370243458874	15.369701128755821	COc1ccc(c2cnccn2)c3cc(oc13)C(=O)Nc4ccncc4
106	CHEMBL251030	train	0.156	31.38242729540442	17.0	21.05573272705078	9.829049129519323	19.81680228799363	Fc1ccc(cc1)C2=CCN(CCCC3=Nc4c(Cl)cccc4C(=O)N3)CC2
107	CHEMBL564705	train	0.16	65.97821233791234	26.105853658536585	62.36496353149414	75.96390391304742	57.60323336024763	Cc1c(nn(c2ccc(Cl)cc2Cl)c1c3ccc(cc3)C4CCCC4)C(=O)NN5CCCCC5
108	CHEMBL2208175	train	0.172	5.246662211038961	3.8548157894736756	-2.934705972671509	-1.5675323298450397	1.149809924499022	O=C1CCC(=NN1c2ccccc2)c3ccccc3
109	CHEMBL3798363	train	0.18333	6.3822902435383195	18.0	6.312350273132324	4.466020753087086	8.790165317439433	Fc1ccc2c(c1)c(OCCN3CCNC3=O)nn2c4ccccc4F
110	CHEMBL3799617	train	0.2	3.1922989143068263	20.0	2.477146863937378	10.401432567147447	9.017719586347912	Fc1ccc2c(c1)c(OCCN3C=CNC3=O)nn2c4ccccc4F
111	CHEMBL3127125	train	0.2	38.20751207326007	18.9	27.934350967407227	32.2540363186615	29.323974839832196	NC1=NC(=CC(=O)N1)c2cc(cc(c2)C(F)(F)F)C#N
112	CHEMBL3739521	train	0.2	25.528540974542057	22.0	38.3234748840332	14.195277264356719	25.011823280732994	CC(C)N1CCC(CC1)NC(=O)c2nc(C(C)C)n3ccccc23
113	CHEMBL3401131	test	0.2	13.7638389867004	16.92070707070707	9.001723289489746	80.4279623283385	30.02855791880893	CN1C(=O)C=C(N=C1N2CCO[C@@H]3CCCC[C@@H]23)c4ccncc4F
114	CHEMBL3401117	train	0.2	46.31199079949765	21.54468668246443	57.8936882019043	73.64432649968735	49.84867304588843	CN1C(=O)C=C(N=C1N2CCOC(C2)C3CCC3)c4ccncc4F
115	CHEMBL551971	train	0.2	178.68701168141834	59.0	145.0499267578125	219.32828843167593	150.51630671772668	Cc1c(nn(c2ccccc2)c1c3ccc(cc3)C4CC4)C(=O)NN5CCCCC5
116	CHEMBL564570	train	0.2	108.89411183956489	21.0	217.55780029296875	229.4452791250975	144.22429781440778	Cc1c(nn(c2ccccc2F)c1c3ccc(cc3)C4CC4)C(=O)NN5CCCCC5
117	CHEMBL556686	train	0.2	76.1065213194636	10.252009174311931	15.387619972229004	45.296560892082574	36.760677839521776	Clc1ccc(c(Cl)c1)n2nc(cc2c3ccc(cc3)C4CC4)C(=O)NN5CCCCC5
118	CHEMBL304358	train	0.202	144.09267872916666	28.0	165.39596557617188	232.10349931909553	142.39803590610853	CC(C)CC[C@H](C[C@H](O)[C@H](Cc1ccccc1)NC(=O)c2cnc3ccccc3n2)C(=O)N
119	CHEMBL3401116	train	0.21	54.5161332134849	19.720999999999997	46.78890609741211	58.06841560532869	44.77361372905642	CCCCC1CN(CCO1)C2=NC(=CC(=O)N2C)c3ccncc3F
120	CHEMBL560370	train	0.21	2.0510781075677063	5.489228508771934	0.2895084023475647	0.6603546107645701	2.1225424073629435	Cc1c(nn(c2ccc(Cl)cc2F)c1c3ccc(cc3)C4CC4)C(=O)NN5CCCCC5
121	CHEMBL3706623	train	0.233	2.7447058689976065	8.0	0.28238192200660706	0.6398975315714256	2.91674633064391	O[C@@H](C[C@@H](Cc1ccccc1)C(=O)N[C@@H]2[C@H](O)COc3ccccc23)CN4CCN(Cc5oc(cc5)c6cccnc6)C[C@H]4C(=O)NCC(F)(F)F
122	CHEMBL68145	train	0.242	109.26787792604605	24.0	86.72561645507812	110.1314995035215	82.53124847116142	NC(=O)C(C[C@H](O)[C@H](Cc1ccccc1)NC(=O)c2cnc3ccccc3n2)C4CCCCC4
123	CHEMBL2448073	train	0.26	101.94718326375376	38.92305086956523	101.49908447265625	78.57079004727835	80.2350271633134	Cl.Cc1c(nn(c2ccc(Cl)cc2Cl)c1c3ccc(cc3)C4CCC4)C(=O)NN5CCCCC5
124	CHEMBL65784	train	0.299	104.59665188949938	74.33333333333333	261.36114501953125	197.92700758334556	159.55453445642738	CC(C)(F)CCC(C[C@H](O)[C@H](Cc1ccccc1)NC(=O)c2cnc3ccccc3n2)C(=O)NCc4ccccc4
125	CHEMBL547606	train	0.3	28.959629114909916	17.582926829268292	9.307172775268555	5.2964524377303706	15.286545289294283	CN(C)CCNC(=O)c1cc2c(nn(C)c2s1)c3ccc(Cl)cc3
126	CHEMBL586213	train	0.3	82.93663383945037	22.0	85.5652084350586	81.19590754660608	67.92443745527876	COc1cc2CCN(C(=O)Nc3cc(OC(F)(F)F)cc(c3)c4cccnc4)c2cc1C(F)(F)F
127	CHEMBL535714	test	0.3	87.46565784048133	21.666666666666668	33.92994689941406	77.43825372970906	55.12513128406778	FC(F)(F)c1ccc(c(NC(=O)C2(CC2)c3ccccc3)c1)n4cncn4
128	CHEMBL2436945	train	0.3	27.99826029354279	19.27777777777778	28.819194793701172	52.68267907799878	32.19447798575513	CCc1nc(N[C@@H]2CCC[C@@H]2C#N)c3C=CNC(=O)c3n1
129	CHEMBL2208169	train	0.305	47.522420111801246	7.0	26.241031646728516	60.0752495465236	35.20967532626334	O=C1COC(=NN1c2ccccc2)c3ccccc3
130	CHEMBL3798242	train	0.31667	120.9035061579976	25.569130454545427	161.06942749023438	105.99140541297957	103.38336737893925	CC(Oc1nn(c2ccccc2F)c3ccc(F)cc13)C(=O)N4CCOCC4
131	CHEMBL1770954	test	0.36	18.65251762291412	8.0	27.59357452392578	30.23910728541389	21.12129985806345	CC(=O)O[C@@]12CO[C@@H]1C[C@H](O)[C@]3(C)[C@@H]2[C@H](CC(=O)c4ccccc4)[C@]5(O)C[C@H](OC(=O)[C@H](O)[C@@H](NC(=O)OC(C)(C)C(F)(F)F)c6ccc(F)cc6)C(=C([C@@H](O)C3=O)C5(C)C)C
132	CHEMBL2208177	train	0.371	33.03479120046621	8.218181818181817	141.1704864501953	79.50412417355469	65.4818959105995	O=C1NC=C(C=C1c2ccccc2)c3ccccc3
133	CHEMBL496227	train	0.4	41.457733409524764	24.400000000000002	8.716673851013184	26.29884548608845	25.2183131866566	Cc1cccc(C)c1CNc2cc(cn3c(C)c(C)nc23)n4cnc(CO)n4
134	CHEMBL561914	train	0.41	2.115844367642335	0.2100000000000007	2.3259522914886475	-2.03467092947422	0.6542814324141909	Cc1c(nn(c2ccc(F)cc2Cl)c1c3ccc(cc3)C4CC4)C(=O)NN5CCCCC5
135	CHEMBL551966	train	0.41	12.154388415261392	0.6705791304347827	-1.4111747741699219	16.72389336705898	7.034421534646309	Cc1c(nn(c2ccc(F)cc2F)c1c3ccc(cc3)C4CC4)C(=O)NN5CCCCC5
136	CHEMBL2170887	train	0.5	9.491755403953904	18.5255	3.9912400245666504	11.697419906163725	10.92647883367107	CCOC(=O)C1=C(Nc2cc(OC)c(F)cc2C1=O)c3cccc(Cl)c3
137	CHEMBL3264002	test	0.5	41.6103327264427	21.484298245614017	32.0153694152832	24.97441391376871	30.02110357527716	CNS(=O)(=O)Nc1nccc(CC2=C(C)c3ccc(Oc4ncccn4)cc3OC2=O)c1F
138	CHEMBL3706621	train	0.5	1.0959082727583862	4.545574468085106	0.6745872497558594	-7.006134849529207	-0.17251621473246392	CC(C)(N1CCN(C[C@@H](O)C[C@@H](Cc2ccccc2)C(=O)N[C@@H]3[C@H](O)COc4ccccc34)[C@@H](C1)C(=O)NCC(F)(F)F)c5oc(cn5)c6ccccn6
139	CHEMBL1080473	train	0.5	35.1679150880231	18.0	29.838829040527344	86.32457002010587	42.332828537164076	Cc1cccc(C)c1CNc2nc(cc3c(C)c(C)[nH]c23)c4ccccc4
140	CHEMBL3623039	train	0.5	4.24894631328648	14.657432567567568	-0.9613670110702515	0.6346439165152297	4.644913946574757	CNC(=O)C1Cc2cc(F)ccc2N1C(=O)COc3ccc(F)cc3
141	CHEMBL467114	train	0.5	7.3671573709812765	17.988491879350395	5.575191497802734	12.833322957703336	10.941040926459436	[Na+].[O-]C(=O)c1cccc(Cc2cc(Cl)ccc2OCc3ccc(Cl)cc3F)n1
142	CHEMBL1825108	train	0.5	41.27217268596109	17.579310344827586	64.78324890136719	47.72087768602287	42.83890240454468	C[C@@H](NC(=O)c1ccc2c(c1)nc(C)n2Cc3ccc(Cl)c(Cl)c3)c4ccccc4
143	CHEMBL1289509	train	0.5	35.16721305003516	24.55	-6.072778224945068	10.583580215994786	16.05700376027122	C[C@H]1CN(CCN1CCc2c(C)ccc3N(C)C(=O)C=Cc23)c4cccc5nc(C)ccc45
144	CHEMBL3094124	train	0.5	37.75065753028405	17.6	25.024341583251953	126.10357685500962	51.6196439921364	C1CC(C1)N2CCc3ccc(OC4CCNCC4)cc3CC2
145	CHEMBL1632206	train	0.5	80.44293028000148	25.4285	56.93778991699219	56.55022009202387	54.83986007225438	CC(=O)Nc1cccc(CCN2CCN(CC2)c3cccc4nc(C)ccc34)c1
146	CHEMBL1834680	train	0.5	29.54025707086869	8.784285714285708	35.080833435058594	-2.1408195723253822	17.8161391619719	CC(C)N(CC(=O)Nc1cc(F)cc(F)c1)C(=O)c2ccc(cc2)c3ccccn3
147	CHEMBL571456	test	0.5	53.851325033126386	25.030139860139858	61.755287170410156	95.67056533664278	59.07682935007979	CC(C)N1CCN(CCN2CCN(C2=O)c3cccc(c3)C#N)CC1
148	CHEMBL549894	train	0.5	42.9441805618767	17.989365655976687	18.55809783935547	21.488403428278737	25.2450118713719	CC(C)N1CCN(CCN2CCN(C2=O)c3cccc(OC(F)(F)F)c3)CC1
149	CHEMBL1825127	train	0.5	20.823647740172408	18.0	9.069284439086914	10.266418275617662	14.539837613719245	CC[C@@H](NC(=O)c1ccc2c(c1)ncn2Cc3ccc(F)cc3F)c4ccccc4
150	CHEMBL1821837	train	0.5	11.220672963705532	15.696381020408156	18.633974075317383	7.288573188627776	13.20990031201471	CC[C@@H](NC(=O)c1ccc2c(c1)ncn2Cc3ncc(F)cc3F)c4ccccc4
151	CHEMBL1223753	train	0.5	25.719317794833117	16.0	-0.8562453985214233	16.512864525582284	14.343984230473495	Cc1cc2N(C3CCN(CC3)C4CCOCC4)C(=O)Nc2cc1F
152	CHEMBL1290596	test	0.5	26.591616620401705	24.0	23.359018325805664	35.5572193069261	27.37696356328337	Cc1ccc2c(cccc2n1)N3CCN(CCc4c(C)ccc5NC(=O)CCc45)CC3
153	CHEMBL490417	train	0.5	47.362046169716386	18.0	19.733137130737305	7.8922914935562565	23.24686869850249	Cc1ccc2c(cccc2n1)N3CCN(CCc4ccc5OCC(=O)Nc5c4)CC3
154	CHEMBL1631535	test	0.5	31.994067683108874	15.893014396551752	32.21119689941406	35.301516452864306	28.84994885798475	Cc1ccc2c(cccc2n1)N3CCN(CCc4cccc(NS(=O)(=O)C)c4)CC3
155	CHEMBL2146599	train	0.5	38.1445023993504	24.0	8.60447883605957	77.21775736056043	36.9916846489926	Cc1ccc2NC(=O)N(C3CCN(CC3)C4CCOCC4)c2c1
156	CHEMBL523563	train	0.5	3.350888842627582	5.48695652173913	1.2471938133239746	1.3776551924813085	2.865673592542999	Cc1cccc(C)c1CNc2cc(cn3c(C)c(C)nc23)N4C=NC=CC4=O
157	CHEMBL498434	train	0.5	38.58479214376792	16.934687499999992	65.07508087158203	58.26806900395285	44.7156573798257	Cc1cccc(C)c1COc2cc(cn3c(C)c(C)nc23)N4C=CC=CC4=O
158	CHEMBL1289387	train	0.5	7.357452180535116	19.050000000000004	6.843371868133545	9.963542431613599	10.803591620070565	Cc1ccccc1N2C[C@@]3(CC[C@@H](CC3)c4nc5cc(OC(F)(F)F)ccc5[nH]4)OC2=O
159	CHEMBL1258035	train	0.5	83.66755678236623	32.96666666666667	77.79177856445312	107.4766615982038	75.47566590292246	Cc1ncoc1c2nnc(SCCCN[C@@H]3CC[C@@]4(CC34)c5ccc(cc5)C(F)(F)F)n2C
160	CHEMBL1825104	train	0.5	51.35202639223231	20.52933333333332	-1.1763495206832886	57.46536848115161	32.04259467150849	CCC(NC(=O)c1ccc2c(c1)nc(C)n2Cc3ccc(Cl)c(Cl)c3)c4ccccc4
161	CHEMBL1215318	test	0.5	58.51318055555556	7.0	55.21309280395508	14.97050458869114	33.92419448705044	CCOC(=O)[C@H](NP(=O)(OC[C@H]1OC(C)(C)O[C@H]1C(=O)NO)Oc2ccc(C)cc2)C(C)C
162	CHEMBL1215320	train	0.5	67.08342153679654	30.9	43.76515579223633	38.11938223673181	44.966989891441166	CCOC(=O)[C@H](NP(=O)(OC[C@H]1OC(C)(C)O[C@H]1C(=O)NO)Oc2ccc(OC)cc2)C(C)C
163	CHEMBL1215394	train	0.5	77.20645171153846	23.0	21.005800247192383	39.73773012114321	40.23749551996851	CCOC(=O)[C@H](NP(=O)(OC[C@H]1OC(C)(C)O[C@H]1C(=O)NO)Oc2cccc(C)c2C)C(C)C
164	CHEMBL1215187	test	0.5	35.00976055555555	5.13	10.689844131469727	-5.849304387971127	11.245075074763538	CCOC(=O)[C@H](NP(=O)(OC[C@H]1OC(C)(C)O[C@H]1C(=O)NO)Oc2ccccc2)C(C)C
165	CHEMBL610795	test	0.5	43.28116463157894	14.348455197368423	117.74109649658203	74.25876869737179	62.407371255725295	Clc1ccc(cc1Cl)[C@@]23CNC[C@@H]2[C@H]3COCC4CC4
166	CHEMBL1649677	train	0.5	26.27221956764985	8.945925925925925	20.536706924438477	1.1205514616929468	14.2188509699268	CN(Cc1ccc(cc1)n2nc(c3CCCCc23)C(F)(F)F)S(=O)(=O)C
167	CHEMBL1222883	test	0.5	57.257693949881244	29.9	49.84392166137695	69.48421749602637	51.621458276821144	CN1[C@@H](CCC1=O)C(=O)NCc2cccc(c2Cl)C(F)(F)F
168	CHEMBL517140	train	0.5	17.269631479958015	18.0	23.472232818603516	16.41635043338113	18.789553682985666	CNC(=O)c1ccc(Oc2ccc3CCN(CCc3c2)C4CCC4)nc1
169	CHEMBL1215319	test	0.5	35.022244433333334	6.2175932203389825	-2.1890869140625	-35.030480490219134	1.005067562347671	COC(=O)[C@@H](C)NP(=O)(OC[C@H]1OC(C)(C)O[C@H]1C(=O)NO)Oc2ccc(OC)cc2
170	CHEMBL1215186	train	0.5	99.55151996782497	17.5	61.71261978149414	36.33800214334518	53.77553547316607	COC(=O)[C@H](NP(=O)(OC[C@H]1OC(C)(C)O[C@H]1C(=O)NO)Oc2ccccc2)C(C)C
171	CHEMBL1631532	train	0.5	67.77233143395506	25.0	50.088279724121094	59.850632219980476	50.677810844514156	COC(=O)Nc1cccc(CCN2CCN(CC2)c3cccc4nc(C)ccc34)c1
172	CHEMBL596809	train	0.5	46.1906944855769	13.280577777777777	28.22144317626953	13.446383063191934	25.284774625704035	COC[C@H]1[C@@H]2CNC[C@]12c3ccc(Cl)c(Cl)c3
173	CHEMBL3094125	train	0.5	37.341362406684965	20.865683060109294	28.032922744750977	92.08695751137925	44.581731430731125	CS(=O)(=O)N1CCC(CC1)Oc2ccc3CCN(CCc3c2)C4CCC4
174	CHEMBL1289820	train	0.5	16.787409850591697	13.245024924242424	23.529956817626953	0.18373518872537423	13.436531695296612	FC(F)(F)c1ccc2[nH]c(nc2c1)[C@@H]3CC[C@@]4(CC3)CN(C(=O)O4)c5ccccc5
175	CHEMBL1289936	test	0.5	3.4271040300586373	10.279725274725275	-2.4956307411193848	-7.585891506887331	0.9063267641942991	FC(F)(F)c1ccc2[nH]c(nc2c1)[C@@H]3CC[C@@]4(CC3)CN(C(=O)O4)c5ccccn5
176	CHEMBL1290706	train	0.5	10.643826848532958	16.342881526104446	5.7098259925842285	-2.2320332344373535	7.6161252831960695	FC(F)(F)c1ccc2[nH]c(nc2c1)N3CCC4(CC3)CN(C(=O)O4)c5ccccc5
177	CHEMBL1649659	test	0.5	36.11092472759062	9.099999999999998	13.086503028869629	47.29298138888172	26.39760228633549	FC(F)(F)c1nn(c2CCCCc12)c3ccc(cc3)C(=O)N4CCCC4
178	CHEMBL1649680	train	0.5	22.92716158925192	8.037037037037036	3.527631998062134	-16.942138712294927	4.38742297801404	FC(F)(F)c1nn(c2CCCCc12)c3ccc(CN4CCCS4(=O)=O)cc3
179	CHEMBL1289267	train	0.5	9.992515100024805	19.0	15.466704368591309	12.107708613087725	14.141732020425959	FC(F)(F)Oc1ccc2[nH]c(nc2c1)[C@@H]3CC[C@@]4(CC3)CN(C(=O)O4)c5ccccc5
180	CHEMBL1289502	train	0.5	9.216667108600955	20.0	10.089752197265625	-3.1502451288559605	9.039043544252657	FC(F)(F)Oc1ccc2[nH]c(nc2c1)[C@@H]3CC[C@@]4(CC3)CN(C(=O)O4)c5ccccc5Cl
181	CHEMBL1289503	test	0.5	2.412209146353332	7.761818181818182	0.04227808117866516	2.05857238333096	3.0687194481702846	FC(F)(F)Oc1ccc2[nH]c(nc2c1)[C@@H]3CC[C@@]4(CC3)CN(C(=O)O4)c5ccccn5
182	CHEMBL1289715	train	0.5	4.1665726387932285	8.798076923076916	5.315369129180908	0.6645967949489343	4.736153871499997	FC(F)(F)Oc1ccc2[nH]c(nc2c1)[C@@H]3CC[C@@]4(CC3)CN(C(=O)O4)c5cccnc5
183	CHEMBL1289154	train	0.5	2.3881915216426792	11.823695652173916	-3.037923574447632	0.47422428563970276	2.912046971252167	FC(F)(F)Oc1ccc2[nH]c(nc2c1)N3CCC4(CC3)CN(C(=O)O4)c5ccccc5
184	CHEMBL1258674	train	0.5	39.728515430300874	15.735467289719619	-2.3169591426849365	9.595885850968646	15.68572735707605	Fc1cc(F)cc(c1)c2ccc(NC[C@@H]3CC[C@@]4(CC3)CN(C(=O)O4)c5cccnn5)nn2
185	CHEMBL1834682	train	0.5	17.02562236372934	19.90714285714286	44.14845275878906	28.808198464659295	27.47235411108014	Fc1cc(F)cc(NC(=O)CN(C2CCOCC2)C(=O)c3ccc(cc3)c4ccccn4)c1
186	CHEMBL1834678	train	0.5	74.76362856353755	25.641860465116277	58.93500518798828	17.296433051674168	44.159231817079075	Fc1cc(F)cc(NC(=O)CN(CC2CC2)C(=O)c3ccc(cc3)c4ccccn4)c1
187	CHEMBL1290038	train	0.5	26.975308061078163	20.782413793103423	14.801025390625	-2.8663929008287012	14.92308858599447	Fc1ccc(cc1)N2C[C@@]3(CC[C@@H](CC3)c4nc5cc(ccc5[nH]4)C#N)OC2=O
188	CHEMBL1289386	train	0.5	15.618571462416428	22.0	12.913637161254883	52.8209051517919	25.838278443865804	Fc1ccc(cc1)N2C[C@@]3(CC[C@@H](CC3)c4nc5cc(OC(F)(F)F)ccc5[nH]4)OC2=O
189	CHEMBL2010883	train	0.5	58.17614118753622	18.0	17.946735382080078	11.401134260432881	26.381002707512295	Fc1ccc2[nH]c(nc2c1CN3CCCC3)c4ccccc4
190	CHEMBL1289714	train	0.5	8.003918627820909	11.838571428571429	2.7309412956237793	4.882294876228693	6.863931557061202	Fc1cccc(n1)N2C[C@@]3(CC[C@@H](CC3)c4nc5cc(OC(F)(F)F)ccc5[nH]4)OC2=O
191	CHEMBL1258673	train	0.5	29.458034290114323	10.0	22.778926849365234	24.617757401499663	21.713679635244805	Fc1ccccc1c2ccc(NC[C@@H]3CC[C@@]4(CC3)CN(C(=O)O4)c5cccnn5)nn2
192	CHEMBL1289268	train	0.5	2.29069938489504	20.779097715827348	-3.114279270172119	-2.9513379200467282	4.2510449776258845	Fc1ccccc1N2C[C@@]3(CC[C@@H](CC3)c4nc5cc(OC(F)(F)F)ccc5[nH]4)OC2=O
193	CHEMBL1258453	train	0.5	19.082700023581822	16.803698549382716	19.013765335083008	0.9730292885120182	13.96829829913989	Fc1ccccc1n2cc(NC[C@@H]3CC[C@@]4(CC3)CN(C(=O)O4)c5cccnn5)cn2
194	CHEMBL2424928	train	0.5	36.26154373326698	24.5	35.67766189575195	23.588511707851158	30.006929334217524	O[C@@]1(CN2CCC(CC2)NCc3cc4OCCOc4cn3)CN5C(=O)C=Cc6ncc(F)c1c56
195	CHEMBL2146598	train	0.5	35.746331887274785	22.0	6.865731239318848	18.7324539194736	20.836129261516806	O=C1Nc2ccccc2N1C3CCN(CC3)C4CCOCC4
196	CHEMBL1290037	train	0.5	33.15391244379711	21.0	15.032015800476074	-12.952133524847065	14.05844867985653	O=C1O[C@@]2(CC[C@H](CC2)c3nc4cc(ccc4[nH]3)C#N)CN1c5ccccc5
197	CHEMBL1276947	train	0.5	71.90418322957458	54.3	92.16770935058594	80.18539529344655	74.63932196840177	OC(=O)[C@]12C[C@H]1CN(C2)C3CC[C@@]4(C3)Cc5ccccc5Cc6ccccc46
198	CHEMBL1277678	test	0.5	28.71588330271633	9.5	9.370402336120605	8.702248369463684	14.072133502075154	OC(=O)C1(F)CCN(CC1)C2CC[C@@]3(C2)Cc4ccccc4Cc5ccccc35
199	CHEMBL1277935	train	0.5	60.10127288544918	9.2	50.79350662231445	20.20108365906386	35.073965791706875	OC(=O)C1=CCCN(C1)C2CC[C@@]3(C2)Cc4ccccc4Cc5ccccc35
200	CHEMBL1277126	test	0.5	13.000383493853406	5.358972125435533	11.540470123291016	13.7535950222888	10.913355191217189	OC(=O)C1=CCN(CC1)C2CCC3(C2)Cc4ccccc4Oc5ccccc35
201	CHEMBL207174	train	0.5	35.97029480776724	8.4	9.541861534118652	-21.326311995911055	8.146461086493709	OC(=O)c1cccc(c1)c2ccccc2c3cc(Cl)ccc3OCc4ccccc4
202	CHEMBL206096	test	0.5	3.7460791429929867	4.905714285714287	1.9148480892181396	3.2337711283793427	3.4501031615761892	OC(=O)c1cccc(c1)c2ncccc2c3cc(Cl)ccc3OCc4ccccc4
203	CHEMBL1277770	train	0.5	52.832694692113854	9.905629179331308	51.35824966430664	12.522747027093178	31.654830140711244	OC(=O)C1CCN(CC1)C2CC[C@@]3(C2)Cc4ccccc4Cc5ccccc35
204	CHEMBL1276948	train	0.5	3.183849029689755	10.0	4.011137008666992	14.879611916770516	8.018649488781815	OC(=O)C1CN(C1)C2CC[C@@]3(C2)Cc4ccccc4Cc5ccccc35
205	CHEMBL1277312	train	0.5	7.112121961666666	7.666666666666667	13.719952583312988	-0.7506148713948563	6.937031585062867	OC(=O)C1CN(C1)C2CCC3(C2)Cc4ccccc4Oc5ccccc35
206	CHEMBL3526438	train	0.5	27.98754862624108	8.400277777777776	26.214153289794922	19.755264787382824	20.58931112029915	Cc1onc(c1NC(=O)NCc2ccc(Cl)cc2Cl)c3ccccc3
207	CHEMBL1288016	train	0.53	105.28119502763349	57.46756756756757	185.4672088623047	98.92401805333073	111.78499737770912	Clc1cc(NC(=O)C(c2ccccc2)c3ccccc3)ccc1N4CCC(CC4)N5CCCCC5
208	CHEMBL4060413	test	0.53	48.53724396258466	17.53518518518517	22.982831954956055	44.823496377700245	33.469689370106536	COc1nn(C)c2ncnc(NS(=O)(=O)c3cccc(Cl)c3Cl)c12
209	CHEMBL1257173	train	0.55	57.068498498048086	25.0	42.06766128540039	50.436864877852244	43.643256165325184	O=C(Nc1nc(cs1)c2ccccn2)N3CCC4(CC3)CN(C(=O)O4)c5ccccc5
210	CHEMBL68937	test	0.56	102.41666016269839	22.793834677419508	60.585235595703125	67.83874098627844	63.40861785552487	CNC(=O)[C@H](CC(C)C)C[C@H](O)[C@H](CC1CCCCC1)NC(=O)c2cnc3ccccc3c2
211	CHEMBL222424	train	0.56	47.44650482842637	22.0	16.55757713317871	58.7116348086148	36.17892919255497	Fc1ccc(cc1)C2(CN(C3CCN(Cc4ccccc4)CC3)C(=O)N2)c5ccc(F)cc5
212	CHEMBL604088	train	0.58	6.784508513673082	24.51303030303031	10.153169631958008	-0.8440011138625143	10.151676833699723	COc1ccc(c2ccccc2)c3cc(oc13)C(=O)Nc4ccncc4
213	CHEMBL2179674	train	0.6	40.02055424946682	22.0	32.35450744628906	28.79988388004166	30.793736393949384	Cn1cc2c(OCC3CCN(CCc4ccc(cc4)C(=O)O)CC3)nc5ccccc5c2c1
214	CHEMBL1271520	train	0.6	47.411005881492564	21.6	-2.538539409637451	-3.641325032029384	15.707785359956432	O=C(N[C@@H]1CN2CCC1CC2)c3cccc4oc(nc34)N5CCOCC5
215	CHEMBL567292	train	0.6	30.605298314032247	21.25789473684209	49.12732696533203	21.252937533558327	30.560864387441175	Cn1ccc2c(Nc3cccc(Cl)c3)ncc(C(=O)N4CCOCC4)c12
216	CHEMBL211815	train	0.6	62.340409499999986	42.70611940298507	76.52498626708984	33.9549328236888	53.881611998440924	C[C@H](CCC(=O)Nc1ccccc1)[C@H]2CC[C@H]3[C@@H]4[C@@H](C[C@@H]5CC6(CC[C@]5(C)[C@H]4C[C@H](OC(=O)C)[C@]23C)OOC7(CCC(CC7)C(=O)Nc8ccccc8)OO6)OC(=O)C
217	CHEMBL379720	test	0.6	61.94257125000001	57.0	36.17438507080078	3.2154144281626995	39.58309268724087	C[C@H](CCC(=O)NCCN(C)C)[C@H]1CC[C@H]2[C@@H]3[C@@H](C[C@@H]4CC5(CC[C@]4(C)[C@H]3C[C@H](OC(=O)C)[C@]12C)OOC6(CCC(CC6)C(=O)NCCN(C)C)OO5)OC(=O)C
218	CHEMBL1289408	train	0.6	49.695176697977175	18.0	29.616445541381836	40.51908501817508	34.457676814383525	CC(C)S(=O)(=O)N[C@@H]1COC[C@@H]1c2ccc(cc2)c3cncc(F)c3
219	CHEMBL1825110	train	0.6	27.567131041632265	18.989942196531793	16.380508422851562	-2.128227193157402	15.202338616964555	CC[C@@H](NC(=O)c1ccc2c(c1)ncn2Cc3ccc(Cl)c(Cl)c3)c4ccccc4
220	CHEMBL4085979	train	0.6	55.725211999999985	56.0	56.774696350097656	19.386822125148143	46.97168261881145	CC[C@H]1OC(=O)[C@H](C)[C@@H](OC(=O)CCNCCNc2cc3C(=O)C(=CN(C4CC4)c3cc2Cl)C(=O)O)[C@H](C)[C@@H](O[C@@H]5O[C@H](C)C[C@@H]([C@H]5O)N(C)C)[C@@](C)(C[C@@H](C)NC(=O)[C@H](C)[C@@H](O)[C@]1(C)O)OC\C=C\c6cnc7ccccc7c6
221	CHEMBL4100467	train	0.6	48.154524999999985	23.0	12.369468688964844	12.825861628929422	24.08746382947356	CC[C@H]1OC(=O)[C@H](C)[C@@H](OC(=O)CCNCCNc2cc3C(=O)C(=CN(C4CC4)c3cc2Cl)C(=O)O)[C@H](C)[C@@H](O[C@@H]5O[C@H](C)C[C@@H]([C@H]5O)N(C)C)[C@@](C)(C[C@@H](C)NC(=O)[C@H](C)[C@@H](O)[C@]1(C)O)OCC=C
222	CHEMBL559655	test	0.6	13.584312225544382	0.28210526315789475	-1.1335419416427612	90.64764422261074	25.845129942417564	Cc1c(nn(c2ccccc2Cl)c1c3ccc(cc3)C4CC4)C(=O)NN5CCCCC5
223	CHEMBL213221	train	0.6	46.084269654158	27.0	20.915470123291016	37.811495386733775	32.9528087910457	Cc1cc(nn1Cc2cc(Br)ccc2OCc3ccccc3)C(=O)O
224	CHEMBL1289609	train	0.6	6.60978402045984	17.705444444444446	14.283248901367188	4.189340067931821	10.696954358550824	Cc1cccc(n1)N2C[C@@]3(CC[C@@H](CC3)c4nc5cc(OC(F)(F)F)ccc5[nH]4)OC2=O
225	CHEMBL1289610	train	0.6	8.380738165807362	18.00521961620466	5.501579284667969	12.054675631115689	10.98555317444892	Cc1ncccc1N2C[C@@]3(CC[C@@H](CC3)c4nc5cc(OC(F)(F)F)ccc5[nH]4)OC2=O
226	CHEMBL550982	train	0.6	32.0495092077358	7.9913043478260875	88.0228500366211	102.71562216003844	57.69482143805536	CCc1c(nn(c1c2ccc(cc2)C3CC3)c4ccc(Cl)cc4Cl)C(=O)NN5CCCCC5
227	CHEMBL552050	train	0.6	26.51099533570919	5.556104325842699	15.1019868850708	54.209057362316315	25.34453597723475	COc1c(nn(c1c2ccc(cc2)C3CC3)c4ccc(Cl)cc4Cl)C(=O)NN5CCCCC5
228	CHEMBL1927165	train	0.6	63.30032470861339	22.0	41.34928894042969	39.03116022421835	41.420193468315354	COc1ccc2ncc(F)c([C@@H](O)CN3CCC(CC3)NCc4cc5OCCOc5cn4)c2n1
229	CHEMBL4072195	train	0.6	36.713644795123926	25.0	7.980053424835205	41.09243881705918	27.696534259254577	Fc1ccc(COc2ccc(cc2C(=O)Nc3cccnc3)c4cn[nH]c4)cc1
230	CHEMBL3092650	train	0.6	67.6847004015873	17.6	54.201141357421875	80.58946494174037	55.01882667518739	O=C1CCCN1c2ccc(Oc3ccc4CCN(CCc4c3)C5CCC5)nc2
231	CHEMBL71499	train	0.647	69.92058256410256	71.0	167.2059326171875	63.49934443404772	92.90646490383445	CN1CCN(CC1)C(=O)C(CCC(C)(C)F)C[C@H](O)[C@H](Cc2ccccc2)NC(=O)c3cnc4ccccc4n3
232	CHEMBL3706619	train	0.655	3.4607874728456913	21.521	-0.1663232445716858	1.672930688513061	6.622098729196767	O[C@@H](C[C@@H](Cc1ccccc1)C(=O)N[C@@H]2[C@H](O)COc3ccccc23)CN4CCN(Cc5oc(cc5)c6ccccn6)C[C@H]4C(=O)NCC(F)(F)F
233	CHEMBL3799951	train	0.68333	40.337968744309784	10.822293269230757	33.817874908447266	20.135705598921984	26.27846063022745	Fc1ccc2c(c1)c(OCCN3CCOC3=O)nn2c4ccccc4F
234	CHEMBL374478	train	0.7	55.87252006901313	19.0	85.35807037353516	61.587729238956854	55.45457992037628	CO[C@H]1\C=C\O[C@@]2(C)Oc3c(C)c(O)c4c(O)c(NC(=O)\C(=C/C=C/[C@H](C)[C@H](O)[C@@H](C)[C@@H](O)[C@@H](C)[C@H](OC(=O)C)[C@@H]1C)\C)c(\C=N\N5CCN(C)CC5)c(O)c4c3C2=O
235	CHEMBL1290059	train	0.7	52.79928667454723	25.32623376623377	56.4283447265625	43.38360409811349	44.48436731636425	CC(C)N1C[C@H](NS(=O)(=O)C(C)C)[C@H](C1)c2ccc(cc2)c3cccc(NS(=O)(=O)C)c3
236	CHEMBL496386	train	0.7	50.23286763760552	19.4	57.283199310302734	75.38899380297849	50.57626518772169	Cc1cccc(C)c1CNc2cc(cn3c(C)c(C)nc23)N4C=C(C=CC4=O)C(=O)N
237	CHEMBL496387	train	0.7	3.6871313703506394	7.101132075471691	0.42679983377456665	-0.25684797700263096	2.7395538256485668	Cc1cccc(C)c1CNc2cc(cn3c(C)c(C)nc23)N4N=CC=CC4=O
238	CHEMBL1290058	test	0.7	28.562284350252995	17.416704545454547	8.017313957214355	42.17795298689231	24.043563959953552	CCN1C[C@H](NS(=O)(=O)C(C)C)[C@H](C1)c2ccc(cc2)c3cccc(NS(=O)(=O)C)c3
239	CHEMBL4070845	train	0.7	76.50945373258612	22.0	122.68343353271484	135.0004767285869	89.04834099847196	CN(C)C(=O)c1ccc(OCc2ccccc2)c(c1)C(=O)Nc3cccnc3
240	CHEMBL1196581	train	0.7	69.90338401163017	23.0	73.10921478271484	36.53034892388729	50.63573692955808	COc1cccnc1C(=O)N2CCN(CC2)c3ccc(NC(=O)C(C)(C)c4ccccc4)cc3Cl
241	CHEMBL1649676	train	0.7	17.991483263708382	12.669488372093015	15.866974830627441	34.36414448793706	20.223022738591474	CS(=O)(=O)NCc1ccc(cc1)n2nc(c3CCCCc23)C(F)(F)F
242	CHEMBL3797487	train	0.71667	47.36436188394122	11.958100069930067	30.150279998779297	35.95866226493496	31.357851054396384	CC(C)(C)OC(=O)NCCOc1cccc2c1cnn2c3ccccc3F
243	ethyl methyl sulphide	train	0.73	7.689999999999982	8.53	13.12646770477295	-14.71237895573381	3.65852218725978	CCSC
244	CHEMBL1236810	train	0.74	35.52905944978359	21.0	33.076820373535156	60.58911023603139	37.54874751483753	C[C@H](CS(=O)(=O)C)Nc1n[nH]c2nc(Oc3ccc(F)cc3F)ncc12
245	CHEMBL207881	train	0.74	77.09434198168498	30.75	87.4464111328125	39.359046085575	58.66244980001812	OC(=O)CCc1ccc(NCc2cccc(Oc3ccccc3)c2)cc1
246	CHEMBL2030016	train	0.76	74.57220409915334	23.0	61.377197265625	75.77617662132562	58.68139449652599	CC1=C(Nc2cc(Cl)ccc2C1=O)c3ccc(Cc4ccc(OC(F)(F)F)cc4)cc3
247	CHEMBL3901288	test	0.76	88.70262130803259	24.88748148148146	111.9926986694336	65.03781636078351	72.65515445493278	COCCN1CCC(CC1)N(CC23CC(C2)(C3)c4ccc(cc4)C(F)(F)F)C(=O)CN5C(=CC(=O)c6ccccc56)SCc7cccc(F)c7F
248	CHEMBL3970041	train	0.77	76.77769949313445	29.916666666666668	44.56431198120117	60.07194406687964	52.83265555197048	COC(=O)[C@@]12C[C@@H]1[C@H]([C@H](O)[C@@H]2O)n3cnc4c(NC(C5CC5)C6CC6)nc(Cl)nc34
249	CHEMBL221401	train	0.78	11.147251375937058	18.268810810810812	2.637451171875	23.76689330937897	13.95510166700046	Fc1ccc(cc1)C2(CN(C3CCN(Cc4cccc(F)c4)CC3)C(=O)N2)c5ccc(F)cc5
250	CHEMBL1289510	train	0.8	20.095382593118313	13.3735227272727	27.403911590576172	5.551949734624202	16.606191661397848	C[C@H]1CN(CCN1CCc2cccc3N(C)C(=O)C=Cc23)c4cc(F)cc5nc(C)ccc45
251	CHEMBL1289409	test	0.8	20.24288113981523	12.981818181818182	12.925429344177246	11.162305983697335	14.328108662376998	CC(C)S(=O)(=O)N[C@@H]1COC[C@@H]1c2ccc(cc2)c3ccc(F)cn3
252	CHEMBL1290166	train	0.8	19.667472274554438	19.478571428571428	18.525300979614258	28.949876435374385	21.655305279528626	CC(C)S(=O)(=O)N[C@H]1CN(C)C[C@@H]1c2ccc(cc2)c3ccc(cc3)C#N
253	CHEMBL1289062	train	0.8	30.30089823496733	18.0	25.377445220947266	36.70845614846528	27.596699901094972	CC(C)S(=O)(=O)N[C@H]1CN(C)C[C@@H]1c2ccc(cc2)c3ccc(F)nc3
254	CHEMBL1649678	train	0.8	23.88374568902044	13.753099236641225	32.46875762939453	17.861067888209202	21.99166761081635	CC(C)S(=O)(=O)NCc1ccc(cc1)n2nc(c3CCCCc23)C(F)(F)F
255	CHEMBL1242717	train	0.8	16.745755957092125	51.0	18.22422981262207	7.706099634153894	23.41902135096702	Cc1ccc2c(cccc2n1)N3CCN(CCc4cccc5c4OCc6c(ncn56)C(=O)N7CCOCC7)CC3
256	CHEMBL1288257	train	0.8	48.218464807566306	30.099999999999998	57.54072570800781	17.429449818949227	38.322160083630834	CCC(C(=O)Nc1ccc(N2CCC(CC2)NCC3CC3)c(Cl)c1)c4ncccn4
257	CHEMBL3094126	test	0.8	23.60761050737209	8.66106502074689	27.278459548950195	24.618113559727803	21.041312159199244	Clc1ccc(cc1)C(=O)N2CCC(CC2)Oc3ccc4CCN(CCc4c3)C5CCC5
258	CHEMBL1258034	test	0.8	44.09882447847385	25.0	59.554718017578125	56.895110224997595	46.38716318026239	Cn1c(SCCCN2CCC3CC3(CC2)c4ccc(cc4)C(F)(F)F)nnc1c5ccnnc5
259	CHEMBL1926763	train	0.8	70.41893877005032	28.235074626865668	83.88948822021484	90.80116458897383	68.33616655152616	COc1ccc2nccc(NC(=O)[C@@]3(O)CC[C@@H](CC3)NCc4cc5OCCOc5cn4)c2n1
260	CHEMBL4077195	train	0.8	43.691648246666674	23.0	25.976970672607422	54.390044370639	36.76466582247828	Fc1ccc(COc2ccc(cc2C(=O)Nc3cccnc3)C(F)(F)F)cc1
261	CHEMBL68692	train	0.836	61.94160265404041	21.9462590361446	-3.635744094848633	95.9739180976292	44.056508923241395	CC(C)(F)CCC(C[C@H](O)[C@H](Cc1ccccc1)NC(=O)c2cnc3ccccc3n2)C(=O)N4CCCC4
262	CHEMBL3628839	train	0.85	48.741689806552586	20.59550295857981	19.29926300048828	58.22968024497622	36.716534002649226	CC(C)Oc1ccc(cc1C#N)c2onc(n2)c3ccc4CN(C[C@@H](O)CO)CCc4c3C
263	CHEMBL223079	train	0.87	10.60271250737191	19.95	4.3743743896484375	10.845013219371276	11.443025029097905	Fc1ccc(cc1)C2(CN(C3CCN(Cc4cccc(Cl)c4)CC3)C(=O)N2)c5ccc(F)cc5
264	CHEMBL563081	train	0.87	16.710872812918836	2.8	22.74842071533203	17.341827933192413	14.90028036536082	Cc1c(nn(c2ccc(Cl)cc2Cl)c1c3ccc(cc3)C4CC4)C(=O)NN5CCCCC5
265	CHEMBL3800069	train	0.9	116.45479291568626	24.8	156.8755340576172	151.80446532372144	112.48369807425622	Fc1ccccc1n2ncc3c(cccc23)N4CC5CN(Cc6ccccc6)CC5C4=O
266	CHEMBL3094123	train	0.9	47.043649664995826	19.0	35.479248046875	62.55346195056249	41.01908991560833	C(Oc1ccc2CCN(CCc2c1)C3CCC3)C4CCNCC4
267	CHEMBL1257215	train	0.9	39.32216873910326	18.0	31.842178344726562	72.00043968780012	40.29119669290749	Cc1ncoc1c2nnc(SCCCN3[C@@H]4CC[C@H]3C[C@H](C4)c5ccc(cc5)C(C)(C)C)n2C
268	CHEMBL1257336	train	0.9	50.03926899763439	17.926666666666666	43.10294723510742	74.03158265606206	46.27511638886763	Cc1ncoc1c2nnc(SCCCN3[C@@H]4CC[C@H]3C[C@H](C4)c5ccc(cc5)C(F)(F)F)n2C
269	CHEMBL1289721	train	0.9	43.025999998823465	13.080357142857148	45.915767669677734	25.38514434735703	31.85181728967884	CN1C(=O)C=Cc2c(CCN3CCC(CC3)c4cccc5nc(C)ccc45)c(C)ccc12
270	CHEMBL3092836	train	0.9	76.5838195604329	50.310344827586206	57.692474365234375	65.69310947536833	62.56993705715546	O=C(N1CCOCC1)N2CCC(CC2)Oc3ccc4CCN(CCc4c3)C5CCC5
271	CHEMBL376781	train	0.95	39.15878366344564	11.794893617021277	11.28377628326416	28.113910017837156	22.58784089539206	Fc1cccc(CN2CCC(CC2)N3CC(NC3=O)(c4cccs4)c5cccs5)c1
272	CHEMBL207293	train	0.96	36.34209498589192	18.0	54.30770492553711	29.25154219452393	34.47533552648824	OC(=O)c1cccc(c1)n2cncc2c3cc(Cl)ccc3OCc4ccccc4
273	CHEMBL3799372	train	1.0	37.03743465295686	10.822293269230757	38.91941833496094	41.88801101896698	32.16678931902888	CN1CCN(CCOc2nn(c3ccccc3F)c4ccc(F)cc24)C1=O
274	CHEMBL2024613	test	1.0	144.70537083333332	66.07	23.24924087524414	138.68783386530131	93.17811139346969	[K+].CCCCCS(=O)(=O)[N-]C(=O)\C=C\c1ccc(OCCOC)cc1Oc2ccc(cn2)C(F)(F)F
275	CHEMBL4077666	test	1.0	17.572422478032195	14.450000000000001	22.25121307373047	-21.61003465606455	8.16590022392453	C[C@H]1[C@@H](O)C(C)(C)C(=O)N1c2ccc(C#N)c(Cl)c2
276	CHEMBL402044	test	1.0	25.918102201023636	24.0	7.0690131187438965	12.740827727878214	17.431985761911438	CC(=O)N1C2CCCC1C=C(CN3CCC(CC3)Nc4ccc5ccccc5n4)C2
277	CHEMBL1258078	train	1.0	42.36137135899319	16.22222222222222	113.13629150390625	35.39799918718334	51.77947106807625	CC(C)N1CCC(CC1)Oc2cc3cc4C(=O)NC[C@H](C)n4c3cc2Br
278	CHEMBL1258873	test	1.0	19.326986701264833	10.0	9.335245132446289	8.632928055932966	11.82378997241102	CC(C)N1CCC(CC1)Oc2ccc3c(c2)cc4C(=O)N(C)CCn34
279	CHEMBL1258754	train	1.0	29.038254393437246	15.85	11.312397003173828	42.587750086358504	24.697100370742394	CC(C)N1CCC(CC1)Oc2ccc3c(c2)cc4C(=O)NCCn34
280	CHEMBL4088914	train	1.0	33.62582901515152	20.420000000000005	72.18132781982422	20.03396904941618	36.56528147109798	CC[C@H]1[C@@H](O)CC(=O)N1c2ccc(C#N)c(c2)C(F)(F)F
281	CHEMBL598145	test	1.0	62.379472943053095	15.767727272727274	32.738441467285156	35.85400861756734	36.684912575158215	CC1=C(C)C(=NNC1=O)Cc2ccc(F)c(c2)C(=O)N3CCC4(CCCN4)CC3
282	CHEMBL605552	test	1.0	53.25289684811638	20.500404830917837	42.96080780029297	59.36900458672191	44.02077851651227	CC1=C(C)C(=NNC1=O)Cc2ccc(F)c(c2)C(=O)N3CCN(CC3)C(=O)C4(C)CCCN4
283	CHEMBL2022126	test	1.0	60.730849835995414	26.5	26.018497467041016	15.926189163532896	32.29388411664233	CCCCCS(=O)(=O)NC(=O)\C=C\c1ccc(OCCO)cc1Oc2ncc(cc2Cl)C(F)(F)F
284	CHEMBL3604174	train	1.0	56.78470692592591	24.0	74.26896667480469	27.234905625208953	45.572144806484886	Clc1ccc(NC(=O)c2cn[nH]n2)c(Cl)c1
285	CHEMBL3084761	train	1.0	57.21039290506913	37.83	30.33648681640625	46.19803091301336	42.89372765862218	CN1[C@@H]2CCC[C@H]1C[C@@H](C2)NC(=O)c3cccc4oc(nc34)N5CCOCC5
286	CHEMBL4101206	train	1.0	26.572181885263625	20.0	18.640609741210938	33.90664060160132	24.77985805701897	CN1CCN(Cc2ccc(NC(=O)c3ccc(C)c(c3)C#Cc4cnc(N)nc4)cc2C(F)(F)F)CC1
287	CHEMBL1171837	train	1.0	57.39636221219608	21.83467741935484	74.01409912109375	67.35123654672971	55.14909382484359	CN1CCN(Cc2ccc(NC(=O)c3ccc(C)c(c3)C#Cc4cnc5cccnn45)cc2C(F)(F)F)CC1
288	CHEMBL3629540	train	1.0	70.98708181580687	26.0	38.39130401611328	59.065897782745985	48.61107090366654	COC1=CN(N=C(C1=O)c2ccnn2c3ccccc3)c4ccc(cc4F)N5CCOC5=O
289	CHEMBL3629732	train	1.0	55.08152557190396	25.0	65.21736907958984	67.801520205752	53.275103714311456	COC1=CN(N=C(C1=O)c2ccnn2c3ccccc3)c4ccc5N(C)C(=O)C(C)(C)c5c4F
290	CHEMBL3629735	train	1.0	77.80259414519422	52.0	47.88821029663086	37.222010374260776	53.72820370402147	COC1=CN(N=C(C1=O)c2ccnn2c3ccccc3)c4ccc5N(CC6CC6)C(=O)C(C)(C)c5c4F
291	CHEMBL2087239	train	1.0	33.2208438790457	28.20615393939394	22.326065063476562	25.04845833632132	27.20038030455938	COc1c2C(=O)N(CC(=O)c3ccccc3)c4ccccc4c2n(C)c1C(=O)NC5CCN(CC5)C(=O)CO
292	CHEMBL3753740	test	1.0	49.589661935643626	24.825	20.300111770629883	25.220764579580386	29.983884571463474	OC(=O)CCNc1nc(cc(n1)n2nccn2)N3CCc4ccccc4CC3
293	CHEMBL2430727	test	1.0	28.67503365127466	16.862	13.169745445251465	15.955755975557654	18.665633768020943	C[C@@H](Nc1nc(cnc1N)c2cc(ccc2C)C(=O)O)c3ccc(Cl)cc3
294	CHEMBL2398064	train	1.0	8.664656560778443	20.506793357933578	1.7177430391311646	4.429092302863567	8.829571315176688	C[C@@H](NS(=O)(=O)c1ccc(nc1)c2c(C#N)c3ccc(OC(F)F)cc3n2C4CCC4)C(F)(F)F
295	CHEMBL2386649	train	1.0	38.87683629531291	17.0	27.070722579956055	25.61943204272981	27.141747729499695	C[C@@H](O)c1nc2cnc3[nH]ccc3c2n1[C@@H]4CCCN(C4)C(=O)CC#N
296	CHEMBL2398065	train	1.0	5.297292839637488	20.177272727272726	1.18577241897583	4.055624967518789	7.678990738351208	C[C@H](NS(=O)(=O)c1ccc(nc1)c2c(C#N)c3ccc(OC(F)F)cc3n2C4CCC4)C(F)(F)F
297	CHEMBL2398058	train	1.0	47.017525391901955	28.0	40.35338592529297	25.898524617452626	35.31735898366189	CC(C)(C)NS(=O)(=O)c1ccc(nc1)c2c(C#N)c3ccc(OC(F)F)cc3n2C4CCC4
298	CHEMBL2398068	test	1.0	22.011140921739358	19.37923076923079	10.84785270690918	1.6160758320625888	13.46357505748548	CC(C)(NS(=O)(=O)c1ccc(nc1)c2c(C#N)c3ccc(OC(F)F)cc3n2C4CCC4)C(F)(F)F
299	CHEMBL2398055	train	1.0	73.14892904227034	23.03096774193548	49.83938980102539	65.90522403577407	52.98112765525132	CC(C)NS(=O)(=O)c1ccc(nc1)c2c(C#N)c3cc(ccc3n2C4CCC4)C5CC5
300	CHEMBL2398054	train	1.0	41.246937479003236	34.0	14.794825553894043	10.44889632638078	25.122664839819514	CC(C)NS(=O)(=O)c1ccc(nc1)c2c(C#N)c3cc(OC(F)(F)F)ccc3n2C4CCC4
301	CHEMBL272584	train	1.0	160.79255	22.0	59.940528869628906	150.21738368664268	98.2376156390679	CC(C)Oc1cc(ccc1C(=O)O)c2ccc(CCNC[C@H](O)c3cccc(Cl)c3)cc2
302	CHEMBL271945	train	1.0	75.32749849864253	22.444512534818934	17.764394760131836	65.6281009342696	45.29112668196572	CC(C)Oc1cc(ccc1C(=O)O)c2ccc(CCNC[C@H](O)c3ccccc3)cc2
303	CHEMBL2398019	train	1.0	36.17634661740994	20.394039735099337	37.42381286621094	33.54187158227153	31.884017700247938	CC(C)S(=O)(=O)Nc1ccc(cc1)c2c(C#N)c3ccc(OC(F)F)cc3n2CC4CC4
304	CHEMBL2398070	train	1.0	26.23266506920004	21.0	21.426908493041992	30.672090720171944	24.832916070603495	CC(NS(=O)(=O)c1ccc(nc1)c2c(C#N)c3ccc(OC(F)F)cc3n2C4CCC4)C#N
305	CHEMBL2158814	train	1.0	15.404500412490922	20.0	22.701501846313477	17.80252889329084	18.97713278802381	Cc1ccc(cc1)S(=O)(=O)NC(=O)N2CCC(CC2)N3CCC(CC3)Oc4ccc(Cl)c(Cl)c4
306	CHEMBL2402509	train	1.0	73.71148834981686	28.0	38.668365478515625	22.646880609329976	40.75668360941562	CCC(CC)(Nc1nc(NC)nc(n1)n2cncn2)C#N
307	CHEMBL2178234	train	1.0	66.54801068323687	18.266666666666634	51.534088134765625	56.52424079294806	48.218251569404295	CN1C[C@@H]([C@H](C1)c2ccc(\C=C\C(=O)Nc3ccccc3N)cc2)C(=O)Nc4ccc(cc4)C#N
308	CHEMBL2398073	test	1.0	47.965241618187044	27.0	49.80036926269531	43.27421762073248	42.00995712540371	FC(F)(F)C1(CC1)NS(=O)(=O)c2ccc(nc2)c3c(C#N)c4ccc(cc4n3C5CCC5)C6CC6
309	CHEMBL2398066	train	1.0	34.90185821586111	25.0	18.700984954833984	12.869171227448048	22.868003599535786	FC(F)Oc1ccc2c(C#N)c(c3ccc(cn3)S(=O)(=O)NC4(CC4)C(F)(F)F)n(C5CCC5)c2c1
310	CHEMBL2398067	train	1.0	30.09983423512474	23.0	22.329206466674805	73.10235861400437	37.13284982895098	FC(F)Oc1ccc2c(C#N)c(c3ccc(cn3)S(=O)(=O)NC4(CCC4)C(F)(F)F)n(C5CCC5)c2c1
311	CHEMBL2398012	train	1.0	48.59957982913429	23.0	41.93144226074219	9.352033160839726	30.72076381267905	FC(F)Oc1ccc2c(C#N)c(c3ccc(NS(=O)(=O)C4CC4)cc3)n(CC5CC5)c2c1
312	CHEMBL2398071	train	1.0	44.205097720352434	22.525517822878243	33.19588088989258	20.8648401091233	30.197834135561635	NS(=O)(=O)c1ccc(nc1)c2c(C#N)c3ccc(OC(F)F)cc3n2C4CCC4
313	CHEMBL2398061	train	1.0	46.72177852437484	25.0	47.02080154418945	41.10825805028554	39.962709529712455	OCC(CO)NS(=O)(=O)c1ccc(nc1)c2c(C#N)c3ccc(OC(F)F)cc3n2C4CCC4
314	CHEMBL1241736	train	1.0	11.835709862203025	7.029197080291973	19.545822143554688	9.352658647372992	11.940846933355669	CC(=O)c1ncn2c1COc3c(CCN4CCN(CC4)c5cccc6nc(C)ccc56)cccc23
315	CHEMBL2037502	train	1.0	32.39295068342446	23.839285714285715	19.594118118286133	62.42735653457095	34.563427762641815	CC[C@H](C)[C@H]1N([C@@H](C(=O)N(C)C)c2ccc(C)[n+]([O-])c2)C(=O)[C@H](NC1=O)C3Cc4ccccc4C3
316	CHEMBL2037508	train	1.0	39.621930597388044	20.0	8.754096031188965	-4.406776466049992	15.992312540631755	CC[C@H](C)[C@H]1N([C@@H](C(=O)N2CCOCC2)c3cnc(C)cc3C)C(=O)[C@H](NC1=O)C4Cc5ccccc5C4
317	CHEMBL1241913	train	1.0	22.49957404353487	8.520833333333332	23.171987533569336	-27.65359865767386	6.63469906319092	Cc1ccc2c(cccc2n1)N3CCN(CCc4cccc5c4OCc6c(ncn56)C(=O)N)CC3
318	CHEMBL513715	train	1.0	40.655108256704	20.42	60.006752014160156	28.080056390492373	37.290479165339136	Cc1ccc2c(cccc2n1)N3CCN(CCc4cccc5NC(=O)COc45)CC3
319	CHEMBL495786	train	1.0	52.1723800911657	9.0	43.940452575683594	13.228760349488535	29.58539825408446	Cc1cccc(C)c1CNc2cc(cn3c(C)c(C)nc23)N4C=CC(=O)C=C4
320	CHEMBL1078344	train	1.0	9.820999887045252	3.1942769230769232	27.60355567932129	14.186877714143478	13.701427550896735	Clc1ccc(cc1)c2ccc(cc2)S(=O)(=O)Cc3ccc4CCNCCc4c3
321	CHEMBL1078267	train	1.0	6.780548186303318	19.562869565217387	6.2715864181518555	2.731594957856349	8.836649781882228	Clc1ccc(cc1)c2ccc(cn2)S(=O)(=O)Cc3ccc4CCNCCc4c3
322	CHEMBL1078345	test	1.0	3.11276872272163	20.324483988657832	2.198098659515381	10.057723785942157	8.92326878920925	Fc1ccc(cc1)c2ccc(cc2)S(=O)(=O)Cc3ccc4CCNCCc4c3
323	CHEMBL1078268	train	1.0	14.297559761999432	23.178831987577652	3.592237710952759	-0.24163592599587816	10.20674838363349	Fc1ccc(cc1)c2ccc(cn2)S(=O)(=O)Cc3ccc4CCNCCc4c3
324	CHEMBL196444	test	1.0	55.60751183305481	18.0	74.25712585449219	34.97117705017614	45.70895368443078	Fc1ccc(CC2=NNC(=O)c3ccccc23)cc1N4C(=O)CCC4=O
325	CHEMBL1078464	test	1.0	27.40759872289847	22.019999999999996	10.90439510345459	15.069770204251897	18.850441007651238	Fc1ccc(Nc2ccc(cn2)S(=O)(=O)Cc3ccc4CCNCCc4c3)cc1
326	CHEMBL3603869	train	1.0	57.06067877369853	19.25	28.42350959777832	19.9109360972478	31.16128111718116	O=C(N1CCCC1)n2cnc(n2)S(=O)(=O)[C@@H]3C[C@H]4CC[C@@H]3C4
327	CHEMBL2436576	train	1.0	49.92918638876827	24.87159550561798	52.0826530456543	78.64975191411439	51.38329671353873	FC(F)(F)Oc1ccc(NC(=O)N2CCC3(CCN(CC3)C(=O)c4cccc5[nH]cnc45)C2)cc1
328	CHEMBL1914489	test	1.0	32.61540347461394	22.0	20.097370147705078	18.99951298908378	23.4280716528507	CC(=O)Nc1cccc2c1c(Sc3ccc(Cl)cc3)c(C)n2CC(=O)O
329	CHEMBL491440	train	1.0	44.5676005931617	25.512672413793098	34.24129867553711	46.85977580199996	37.79533687112297	CC1(C)Cc2nc(sc2C(=O)N1)N1CCOc2ccc(cc21)Nc1ccc(nn1)N1CCNCC1
330	CHEMBL449049	test	1.0	15.992395985850749	19.0	9.724859237670898	16.448774300643798	15.291507381041361	CC1(C)Cc2nc(sc2C(=O)N1)N3CCOCC3
331	CHEMBL1917451	train	1.0	54.271701739926755	18.935294117647057	33.413665771484375	14.434888120219924	30.26388743731953	Cc1ccc2c(c1)c(c(C)n2CC(=O)O)S(=O)(=O)c3ccccc3Cl
332	CHEMBL1862041	train	1.0	57.34426642500001	28.0	23.165874481201172	120.26868714199647	57.194707012049406	CCCCCC(C)NCc1coc(n1)c2ccc(cc2)c3ccccc3
333	CHEMBL1923005	train	1.0	31.31151173255214	26.5	20.438371658325195	36.61499961276231	28.716220750909912	Cn1ccc2ncnc(c12)Nc1ccc(c(c1)Cl)Oc1cccc(c1)OC(F)(F)F
334	CHEMBL1668261	train	1.0	49.25904209297583	23.0	31.093677520751953	30.382841195337523	33.433890202266326	COc1ccc(c(OC)n1)c2nc3cc(F)c(F)cc3n2[C@@H](C4CCCCC4)C(=O)N[C@@H]5CC[C@H](CC5)C(=O)O
335	CHEMBL560450	test	1.04	28.340232710303976	14.043037037037035	35.88198471069336	116.37890713747656	48.66104039887773	CCc1c(nn(c2ccc(Cl)cc2Cl)c1c3ccc(cc3)C4CC4)C(=O)NN5CCCC5
336	CHEMBL3746329	train	1.1	30.933688401383495	9.22	12.238956451416016	0.5385093613845797	13.232788553546023	OC(=O)C1(CCC1)Sc2ccnc3ccc(Br)cc23
337	CHEMBL3684869	train	1.1	50.66679999999999	22.0	43.35971450805664	23.81322365303059	34.9599345402718	CC[C@@H](C[C@H]1COC(=N1)N)c2ccccc2
338	CHEMBL376000	train	1.1	49.4730020903613	28.7	81.90778350830078	45.769986350671765	51.46269298733346	O=C1NC(CN1C2CCN(Cc3ccccc3)CC2)(c4ccccc4)c5ccccc5
339	CHEMBL1915251	train	1.1	75.47509889126457	55.0	200.7975616455078	190.96782732539464	130.56012196554175	CC(C)c1oc2c(Cn3nc(cc3C)C(=O)NN4CCOCC4)cc(Cl)cc2c1
340	CHEMBL1915264	train	1.1	54.03675867436361	22.164333400000004	73.72273254394531	72.37824154247404	55.575516540195736	Cc1cc(nn1Cc2cc(Cl)cc3cc(oc23)c4ccccc4)C(=O)NN5CCOCC5
341	CHEMBL1080293	train	1.1	53.863169409739875	53.71935483870968	40.193016052246094	94.56596497569771	60.58537631909834	Cc1ccc2c(cccc2n1)c3nnc(SCCCN4CC5CC5(C4)c6ccc(cc6)C(F)(F)F)n3C
342	CHEMBL1241641	train	1.1	36.91679066379588	9.014695483870952	46.49010467529297	19.02875038691704	27.86258530246921	Cc1ccc2c(cccc2n1)N3CCN(CCc4cccc5c4OCc6nc(cn56)C(F)(F)F)CC3
343	CHEMBL522257	train	1.1	41.91053567743117	8.0	37.76185989379883	43.86565713444799	32.884513176419496	CN1C(=O)COc2ccc(CCN3CCN(CC3)c4cccc5nc(C)ccc45)cc12
344	CHEMBL3127124	test	1.2	42.604537243589746	27.0	32.15374755859375	37.190867188233725	34.737287997604305	Cc1cc(cc(c1)C2=CC(=O)NC(=N2)N)C#N
345	CHEMBL2170888	train	1.2	16.98555526464077	1.6282608695652172	6.171755313873291	9.161354020858893	8.486731367234542	CCOC(=O)C1=C(Nc2cc(OC)c(F)cc2C1=O)c3cccc(Br)c3
346	CHEMBL4104214	train	1.2	50.01581680480362	28.0	31.785564422607422	5.3849032567844075	28.796571121048864	Nc1nc(N)c2nc(CN(Cc3ccc(cc3)B(O)O)c4ccc(cc4)C(=O)N[C@@H](CCC(=O)O)C(=O)O)cnc2n1
347	CHEMBL1289277	train	1.2	35.16721305003516	24.55	-6.072778224945068	10.583580215994786	16.05700376027122	C[C@@H]1CN(CCN1CCc2c(C)ccc3N(C)C(=O)C=Cc23)c4cccc5nc(C)ccc45
348	CHEMBL1631540	train	1.2	49.158478772274655	19.0	6.930983066558838	40.34573846552267	28.858800076089043	Cc1ccc2c(cccc2n1)N3CCN(CCc4cccc(c4)N5CCNC5=O)CC3
349	CHEMBL1631542	test	1.2	24.84023928156452	6.8981176470588155	45.62482833862305	56.13957251149749	33.37568944468597	Cc1ccc2c(cccc2n1)N3CCN(CCc4cccc(c4)N5CCOC5=O)CC3
350	CHEMBL1230468	train	1.2	37.13826543579548	23.214492753623187	28.731721878051758	42.5469441639343	32.90785605785118	Cc1nn(C)c(C)c1NS(=O)(=O)c2c(Cl)cc(cc2Cl)c3ccnc(c3)N4CCNCC4
351	CHEMBL3094127	train	1.2	64.43282505325378	24.22480434782605	33.94365310668945	26.69539234658882	37.32416871358953	Cc1onc(c1)C(=O)N2CCC(CC2)Oc3ccc4CCN(CCc4c3)C5CCC5
352	CHEMBL1290275	train	1.2	27.207261253851403	9.837578786127178	40.880313873291016	34.57733489612268	28.12562220234807	CCN1C[C@H](NS(=O)(=O)C(C)C)[C@H](C1)c2ccc(cc2)c3ccc(cc3)C#N
353	CHEMBL2021577	train	1.2	200.49569999999997	27.39	41.220916748046875	39.73753679834023	77.21103838659677	CCOC[C@H]1[C@@H]2CNC[C@]12C
354	CHEMBL608151	train	1.2	27.404105674696975	8.0	10.613512992858887	19.11004161259697	16.28191507003821	CCOC[C@H]1[C@@H]2CNC[C@]12c3ccc(Cl)c(Cl)c3
355	CHEMBL1290716	train	1.2	13.023756117242577	19.0	6.718086242675781	28.66556769193957	16.851852512964484	CN1C(=O)C=Cc2c(CCN3CCN(CC3)c4cccc5nc(C)ccc45)cccc12
356	CHEMBL4098650	train	1.2	36.16277499341952	20.263174657534236	-4.2032365798950195	10.484659261513167	15.676843083142975	Cn1cc(cn1)c2ccc(OCc3ccccc3)c(c2)C(=O)Nc4cccnc4
357	CHEMBL1783890	train	1.2	10.781517633082071	12.838181818181816	-11.085040092468262	28.489322903933857	10.25599556568237	CNC(=O)c1cnc(Oc2ccc3CCN(CCc3c2)C4CCC4)cn1
358	CHEMBL1172744	train	1.2	38.51911842857141	17.8	27.166481018066406	26.652242161712845	27.534460402087667	COC[C@@]12CNCC[C@@]1(C2)c3ccc4ccccc4c3
359	CHEMBL2204495	train	1.2	71.22210740591099	32.36	44.2736930847168	1.235803931941877	37.27290110564242	Fc1cc(ccn1)c2ccc(OCc3ccccc3)c(c2)C(=O)Nc4cccnc4
360	CHEMBL3967156	train	1.22	75.05335404761905	26.7	73.32794952392578	65.25505783487887	60.08409035160592	CCN(CC)CCN(CC12CC(C1)(C2)c3ccc(cc3)C(F)(F)F)C(=O)CN4C5=C(CCC5)C(=O)N=C4SCc6ccc(F)cc6
361	CHEMBL3261161	train	1.25	45.52251416189512	18.805223880597016	61.741275787353516	51.634621686945	44.425908879197664	OC[C@@H](O)CN1N=Cc2cncc(Nc3ccc(I)cc3F)c2C1=O
362	CHEMBL3288755	train	1.3	52.13945067309913	22.468	48.1192626953125	43.24705322275934	41.49344164779274	CCN1C(=O)CN(C1=O)c2ccc(Cc3cc(ccc3Cl)[C@@H]4O[C@H](CO)[C@@H](O)[C@H](O)[C@H]4O)cc2
363	CHEMBL497011	train	1.3	43.97098346291657	22.499838323353462	79.60419464111328	39.848152712746796	46.480792285032535	Cc1cccc(C)c1CNc2cc(cn3c(C)c(C)nc23)C(=O)NCCO
364	CHEMBL1079957	train	1.3	17.610586201637794	8.878902439024378	9.212270736694336	9.214296195414407	11.229013893192729	Cc1cccc(C)c1CNc2nc(cc3c(C)c(C)[nH]c23)N4CCNC4=O
365	CHEMBL3623021	train	1.3	3.9495191159060226	7.465620657894736	3.6754543781280518	12.07249295870877	6.790771777659395	CNC(=O)[C@H]1Cc2ccccc2N1C(=O)COc3ccc(F)cc3
366	CHEMBL2386628	test	1.3	28.995351762511003	9.0	34.819175720214844	44.03412685200381	29.212163583682415	CO[C@@H]1CC[C@H](CC1)n2c(nc3cnc4[nH]ccc4c23)[C@@H](C)O
367	CHEMBL1835899	train	1.3	56.17430252235295	20.0	47.74589157104492	27.181104970485066	37.77532476597074	CC(C)CN(CC(=O)Nc1cc(F)cc(F)c1)C(=O)c2ccc(cc2)c3ccccn3
368	CHEMBL1241825	train	1.3	74.00014077744555	14.514285714285714	216.65576171875	115.68868362386458	105.21471795858646	Cc1ccc2c(cccc2n1)N3CCN(CCc4cccc5c4OCc6c(ncn56)C#N)CC3
369	CHEMBL1241639	test	1.3	48.394693435126044	9.004382716049358	37.57854461669922	12.01552638333132	26.748286787801483	Cc1ccc2c(cccc2n1)N3CCN(CCc4cccc5c4OCc6nnnn56)CC3
370	CHEMBL496035	train	1.3	29.33057851215952	17.93809523809524	31.875459671020508	26.17711626538943	26.330312421666175	Cc1cccc(C)c1CNc2cc(cn3c(C)c(C)nc23)n4ncnc4CO
371	CHEMBL1632220	train	1.3	81.74847260759759	24.958403755868545	48.04729080200195	13.837158338367056	42.14783137595879	CCNC(=O)Nc1cccc(CCN2CCN(CC2)c3cccc4nc(C)ccc34)c1
372	CHEMBL1290597	train	1.3	5.187751722245043	8.520000000000001	-8.359970092773438	3.282001185342966	2.157445703703643	CN1C(=O)CCc2c(CCN3CCN(CC3)c4cccc5nc(C)ccc45)c(C)ccc12
373	CHEMBL1241912	train	1.3	15.194392640214703	20.403948799999974	-9.76585578918457	8.620200565719419	8.613171554187382	CNC(=O)c1ncn2c1COc3c(CCN4CCN(CC4)c5cccc6nc(C)ccc56)cccc23
374	CHEMBL1649658	test	1.3	26.725742242388073	18.0	27.137908935546875	71.99506386969621	35.96467876190779	FC(F)(F)c1nn(c2CCCCc12)c3ccc(cc3)C(=O)N4CCOCC4
375	CHEMBL2386627	train	1.4	12.049904249206339	17.615982758620685	-1.8292648792266846	-16.935089919601133	2.7253830522498017	C[C@@H](O)c1nc2cnc3[nH]ccc3c2n1[C@@H]4CCC[C@@H](O)C4
376	CHEMBL605209	test	1.4	19.183839696910137	18.800000000000004	37.28962707519531	34.6698857864181	27.485838139630886	CC(C)OC[C@@H]1[C@H]2CNC[C@@]12c3ccc(Cl)c(Cl)c3
377	CHEMBL3623016	train	1.4	54.28698591313068	21.88	58.18383026123047	38.62540049822298	43.24405416814603	CNC(=O)C1Cc2ccccc2N1C(=O)COc3ccccc3
378	CHEMBL1288200	train	1.4	71.44625441172163	24.5	63.45671463012695	61.19530629196103	55.1495688334524	CC(C)(C(=O)Nc1ccc(N2CCC(CC2)NCC3CC3)c(Cl)c1)c4cccc(c4)C(F)(F)F
379	CHEMBL1241546	train	1.4	32.79802767823436	23.71842105263158	13.675028800964355	5.179108444416751	18.842646494061764	Cc1ccc2c(cccc2n1)N3CCN(CCc4cccc5c4OCc6c(C)nnn56)CC3
380	CHEMBL1242081	train	1.4	11.542908491079793	19.87735849056604	38.48426818847656	28.53229791603086	24.60920827153831	Cc1ccc2c(cccc2n1)N3CCN(CCc4cccc5c4OCc6c(ncn56)C(=O)NC7CC7)CC3
381	CHEMBL1172850	train	1.4	1.398666666666669	1.8310810810810758	2.8791604042053223	1.1696459424433003	1.8196385235990917	COC[C@@]12CCNC[C@@]1(C2)c3ccc(Cl)c(Cl)c3
382	CHEMBL1173532	train	1.4	1.6201509669047645	7.990134529147982	1.4758820533752441	1.4292552338682851	3.128855695824069	COC[C@@]12CNCC[C@@]1(C2)c3ccc(Cl)c(Cl)c3
383	CHEMBL209244	train	1.4	42.88766339726999	8.65	40.09363555908203	-7.321811298305644	21.077371914511595	OC(=O)c1cccc(c1)c2ccncc2c3cc(Cl)ccc3OCc4ccccc4
384	tolbutamide	train	1.45	106.21887994871796	8.355	79.30340576171875	90.51136764166138	71.09716333802452	CCCCNC(=O)NS(=O)(=O)C1=CC=C(C)C=C1
385	CHEMBL513491	train	1.5	6.191506539647487	7.725609756097561	1.0010416507720947	3.069654125910424	4.4969530181068915	[Na+].[O-]C(=O)c1cccc(Cc2cc(Cl)ccc2OCc3ccc(F)cc3Cl)n1
386	CHEMBL1287827	train	1.5	14.398375680770307	21.133333333333333	11.779839515686035	14.331466252823258	15.410753695653234	C[C@H]1CN(CCN1CCc2cccc3N(C)C(=O)C=Cc23)c4cccc5nc(C)ccc45
387	CHEMBL1241640	train	1.5	16.06959475509072	19.5	20.521068572998047	25.356176209373142	20.361709884365478	CCOC(=O)c1ncn2c1COc3c(CCN4CCN(CC4)c5cccc6nc(C)ccc56)cccc23
388	CHEMBL3603872	train	1.5	23.98888820732727	19.85833333333332	6.240880966186523	53.97714939137744	26.016312974556136	CN(Cc1ccccc1)C(=O)n2cnc(n2)S(=O)(=O)[C@@H]3C[C@H]4CC[C@@H]3C4
389	CHEMBL1289048	test	1.5	2.642780029274559	10.279725274725275	-3.0853798389434814	-3.4658309751986334	1.5928236224644299	CN1C(=O)C=Cc2c(CCN3CCN(CC3)c4cccc5nc(C)ccc45)c(C)ccc12
390	CHEMBL4071631	train	1.5	28.444676602948608	9.66	36.85481262207031	19.173481391913633	23.533242654233142	Cn1cc(cn1)c2ccc(OCc3ccc(F)cc3)c(c2)C(=O)Nc4cccnc4
391	CHEMBL386925	train	1.5	57.26823438696799	27.68408888888886	94.64205169677734	127.09946338848435	76.67345959027963	COc1cc(ccc1OCCN2CCCC2)N3C=Nc4cc(ccc4C3=O)c5ccccc5
392	CHEMBL384489	train	1.5	66.9954018427966	22.530517241379307	87.56260681152344	93.1948854276668	67.57085283084155	COc1cc(ccc1OCCN2CCCC2)N3N=Nc4cc(ccc4C3=O)c5ccccc5
393	CHEMBL1834686	test	1.5	59.71080668587628	14.062853185595596	38.916316986083984	56.018798478312696	42.17719383396714	COCCN(CC(=O)Nc1cc(F)cc(F)c1)C(=O)c2ccc(cc2)c3ccccn3
394	CHEMBL3603870	train	1.5	52.84865957142857	21.773302491103262	43.934974670410156	45.62570830580765	41.04566125968741	O=C(N1CCCC1)n2cnc(S[C@@H]3C[C@H]4CC[C@@H]3C4)n2
395	CHEMBL383090	train	1.5	20.26223032042096	16.133333333333333	23.799816131591797	19.017267577129026	19.803161840618777	OC(=O)c1cccc(c1)n2cccc2c3cc(Cl)ccc3OCc4ccccc4
396	hexachloro-1,3-butadiene	train	1.56	32.37370000000001	20.0	41.19304656982422	54.67197665766554	37.05968080687244	ClC(Cl)=C(Cl)C(Cl)=C(Cl)Cl
397	CHEMBL567911	test	1.6	16.59786259979162	18.535699334565557	23.749345779418945	6.702422206762817	16.396332480134735	Cc1c[nH]c2c(Nc3cccc(Cl)c3)ncc(C(=O)N4CCOCC4)c12
398	CHEMBL1079436	train	1.6	5.514740686113075	5.965465116279069	-0.3929579257965088	15.945257927426521	6.758126451005539	Cc1cccc(C)c1CNc2nc(cc3c(C)c(C)[nH]c23)N4CCOCC4=O
399	CHEMBL3623038	train	1.6	10.966520994404862	8.5	0.07478433847427368	8.631733104337826	7.04325960930424	CNC(=O)C1Cc2cc(F)ccc2N1C(=O)COc3ccc(Cl)cc3
400	CHEMBL3318423	train	1.6	41.081933310510294	22.6	11.955879211425781	11.894816115757795	21.883157159423465	OC1=C(Sc2ccccc2C#N)C(=O)CC(C1)c3ccccc3
401	CHEMBL537586	test	1.6	23.605493110069514	13.5	9.161030769348145	25.334569666994707	17.900273386603093	CC(C)N(C)C(=O)n1cnc(n1)S(=O)(=O)C2CC3CCC2C3
402	CHEMBL377852	train	1.6	9.198906155607908	6.585507246376811	18.929166793823242	27.76368941796709	15.619317403443763	Cc1ccc(c2cc(Cl)ccc2OCc3ccccc3)n1c4cccc(c4)C(=O)O
403	CHEMBL1649660	train	1.6	43.556190406036514	19.0	73.31844329833984	32.4371377663603	42.077942867684165	CCCCN(C)C(=O)c1ccc(cc1)n2nc(c3CCCCc23)C(F)(F)F
404	CHEMBL1241824	train	1.6	24.552868095733356	7.548079999999989	18.131877899169922	12.384987894818737	15.6544534724305	CN(C)C(=O)c1ncn2c1COc3c(CCN4CCN(CC4)c5cccc6nc(C)ccc56)cccc23
405	CHEMBL1289276	test	1.6	29.08438569134958	21.0	15.10937213897705	-4.7959653830202	15.099448111826607	CN1C(=O)C=Cc2c(CCN3CCN(CC3)c4cc(F)cc5nc(C)ccc45)c(C)ccc12
406	CHEMBL1649679	train	1.6	24.51211298053226	20.0	29.099929809570312	10.0612184204479	20.91831530263762	FC(F)(F)c1nn(c2CCCCc12)c3ccc(CNS(=O)(=O)C4CC4)cc3
407	CHEMBL559856	train	1.6	38.81113971540288	14.903295454545452	21.38936424255371	39.21069227387686	28.578622921594725	O=C1N(CCN2Cc3ccccc3C2)CCN1c4cccc(c4)C#N
408	CHEMBL3127134	test	1.7	27.115758396248356	17.293122529644283	-1.30040442943573	18.378812204889478	15.371822175336597	NC1=NC(=C(C#N)C(=O)N1)c2ccc(OCC3CC3)c(c2)C#N
409	CHEMBL3127133	train	1.7	29.87420880125543	20.39	29.63681411743164	42.77029079278629	30.667828427868344	NC1=NC(=C(Cl)C(=O)N1)c2ccc(OCCCCO)c(c2)C#N
410	CHEMBL3261479	train	1.7	16.56056411949954	9.117743589743595	7.85431432723999	3.2566694739350113	9.197322877604535	O=C1N(CCn2ccc3cccc1c23)[C@@H]4CN5CCC4CC5
411	CHEMBL3261481	train	1.7	19.23868333333336	2.0	27.450538635253906	64.87438142503416	28.390900848405355	O=C1N(CCn2ncc3cccc1c23)[C@@H]4CN5CCC4CC5
412	CHEMBL112466	train	1.7	51.70976228859633	28.0	57.22023010253906	86.12783311939758	55.76445637763324	COc1cccc(c1)C2=C(C)N(Cc3c(F)cccc3F)C(=O)N(C[C@@H](C)N(C)Cc4ccccn4)C2=O
413	CHEMBL1241998	train	1.7	39.461036175276156	12.5824812037037	68.79312896728516	18.864821776577376	34.925367030710596	CC(C)NC(=O)c1ncn2c1COc3c(CCN4CCN(CC4)c5cccc6nc(C)ccc56)cccc23
414	CHEMBL496426	train	1.7	25.693100396294412	4.7	9.264739990234375	32.90065158635138	18.139622993220044	Cc1cccc(C)c1CNc2cc(cn3c(C)c(C)nc23)c4occc4
415	CHEMBL1081687	train	1.7	55.2028143210752	25.0	73.01077270507812	56.32469300977939	52.38457000898318	Cc1ncccc1c2nnc(SCCCN3C[C@@H]4C[C@@]4(C3)c5ccc(cc5)C(F)(F)F)n2C
416	CHEMBL496624	train	1.7	29.73160350917119	9.940134453781507	23.139989852905273	27.721934323443715	22.63341553482542	CCc1cccc(C)c1CNc2cc(cn3c(C)c(C)nc23)c4ncnn4C
417	CHEMBL1081867	train	1.7	62.438311415011185	22.22	65.27324676513672	51.20844753232664	50.28500142811863	Cn1c(SCCCN2C[C@@H]3C[C@@]3(C2)c4ccc(cc4)C(F)(F)F)nnc1c5ccnnc5
418	CHEMBL1241737	train	1.7	3.607425708150481	19.87735849056604	-4.573487281799316	-9.726963489603914	2.296083356828322	CO\N=C(/C)\c1ncn2c1COc3c(CCN4CCN(CC4)c5cccc6nc(C)ccc56)cccc23
419	CHEMBL478244	train	1.7	53.21715933560254	16.17367864942521	42.323368072509766	42.57675732690778	38.57274084611132	Fc1ccc(cc1)c2ccc(cn2)C(=O)Nc3ccc4cccnc4c3
420	CHEMBL3976121	test	1.75	14.094222480234377	29.485467836257307	2.6168768405914307	3.570318030319625	12.441721296850686	CNC(=O)[C@@]12C[C@@H]1[C@H]([C@H](O)[C@@H]2O)n3cnc4c(NC(C5CC5)C6CC6)nc(Cl)nc34
421	CHEMBL2030298	train	1.78	43.47760298755192	16.698409090909085	44.36919021606445	29.82390784964825	33.592277536043426	CC1=C(Nc2ccccc2C1=O)c3ccc(nc3)c4ccc(OC(F)(F)F)cc4
422	CHEMBL806	train	1.8	42.2806533707265	21.0	50.906185150146484	32.42815580179247	36.65374858066636	CC(C)C(=O)Nc1ccc(c(c1)C(F)(F)F)[N+](=O)[O-]
423	CHEMBL3261485	train	1.8	30.32895878484849	8.4	-8.147821426391602	20.596437572751203	12.794393732802021	COc1cc2C(=O)N(CCn3ncc(c1)c23)[C@@H]4CN5CCC4CC5
424	CHEMBL3680154	test	1.8	88.51053583333334	26.142857142857142	136.88067626953125	92.63126600465559	86.04133381259433	NC1=N[C@H](CO1)c2ccc(Cl)c(Cl)c2
425	CHEMBL2386645	train	1.8	11.616388299475853	7.6	16.18405532836914	12.198317136100401	11.899690190986348	OC[C@@H](O)c1nc2cnc3[nH]ccc3c2n1C4CCCCC4
426	CHEMBL1287953	train	1.8	48.74742508742472	28.0	20.30291175842285	31.301755599803176	32.08802311141269	CC(C)(C(=O)Nc1ccc(N2CCC3(CCN(CC4CC4)C3)CC2)c(Cl)c1)c5nccc(n5)C(F)(F)F
427	CHEMBL377649	train	1.8	8.094913550549249	10.797419354838713	6.4952192306518555	-1.7620327129984463	5.906379855760342	Cc1ccc(c2cc(Br)ccc2OCc3ccccc3)n1c4cccc(c4)C(=O)O
428	CHEMBL244946	train	1.8	50.747773595477476	58.3	60.053043365478516	38.20056100868023	51.82534449240906	Cc1ccc2c(cccc2n1)c3nnc(SCCCN4CCc5ccc(cc5CC4)c6cc(C)nn6C)n3C
429	CHEMBL1632223	test	1.8	69.7815129418894	52.98900793650794	57.76405334472656	6.405095511647208	46.73491743369278	Cc1ccc2c(cccc2n1)N3CCN(CCc4cccc(NC(=O)Nc5ccccc5)c4)CC3
430	CHEMBL1242533	test	1.8	10.412138039757904	19.0	7.978550910949707	3.598943683608248	10.247408158578965	Cc1ccc2c(cccc2n1)N3CCN(CCc4cccc5c4OCc6c(ncn56)C(=O)N7CCCC7)CC3
431	CHEMBL1241738	test	1.8	23.378128391526133	8.0	36.421592712402344	17.31833227143901	21.27951334384187	Cc1ccc2c(cccc2n1)N3CCN(CCc4cccc5c4OCc6nnc(C)n56)CC3
432	tenoxicam	train	1.89	71.37707633368517	24.0	65.66136169433594	50.328063308417114	52.84162533410956	C1C=NC(=CC=1)NC(=O)C2N(C)S(=O)(=O)C3=C(SC=C3)C=2O
433	CHEMBL2386625	train	1.9	2.1191179166666636	9.85	2.2302210330963135	1.4415606965638528	3.9102249115817074	C[C@@H](O)c1nc2cnc3[nH]ccc3c2n1[C@@H]4CC[C@@H](O)CC4
434	CHEMBL3623041	test	1.9	26.328219590663313	22.06121848739485	41.258663177490234	42.45601593269254	33.026029297060234	CNC(=O)C1Cc2cc(F)c(F)cc2N1C(=O)COc3ccc(F)cc3
435	CHEMBL496605	train	1.9	3.7146226278205834	5.48695652173913	1.2479020357131958	-4.49505437379855	1.4886067028685896	Cc1cccc(C)c1CNc2cc(cn3c(C)c(C)nc23)N4C=CC=CC4=O
436	CHEMBL1288256	train	1.9	42.14663646735878	24.0	32.746742248535156	26.49655695699385	31.347483918221947	Cc1ccnc(n1)C(C)(C)C(=O)Nc2ccc(N3CCC(CC3)NCC4CC4)c(Cl)c2
437	CHEMBL1834679	train	1.9	57.081393329391815	19.90714285714286	84.54715728759766	99.84194637006536	65.34440996104942	Fc1cc(F)cc(NC(=O)CN(C2CCCC2)C(=O)c3ccc(cc3)c4ccccn4)c1
438	CHEMBL2146597	test	1.9	16.94228064211472	5.3600382456140085	17.579256057739258	-11.699382195470317	7.045548187499418	O=C1Nc2ccccc2N1C3CCN(CC3)C4CCCCC4
439	CHEMBL403332	train	1.9	51.92182488100682	33.33288715953309	22.217994689941406	26.290868057001592	33.44089369687073	FC1(F)CCNC(=O)[C@@H](C1)N(Cc2ccc(cc2)C(=O)NC3CC3)S(=O)(=O)c4ccc(Cl)cc4
440	CHEMBL3736186	train	1.97	64.70555076485283	38.00559006211182	19.527013778686523	10.566243671614052	33.201099569316305	Nc1ncc(cn1)c2nc(nc3N(CCc23)c4ccc(CN5CCOCC5)cc4)N6CCOCC6
441	CHEMBL4074501	train	2.0	15.366751638125761	19.0	7.0504608154296875	-1.8171773751042988	9.900008769612787	C[C@H]1[C@@H](O)[C@H](C)C(=O)N1c2ccc(C#N)c(Cl)c2
442	CHEMBL3084776	train	2.0	46.66268531236437	19.0	18.752803802490234	65.91956917002813	37.583764571220684	C[C@H]1CNC[C@H](C)N1c2oc3cccc(C(=O)N[C@@H]4C[C@H]5CCC[C@@H](C4)N5C)c3n2
443	CHEMBL270805	train	2.0	65.00800639564444	20.94436464088398	59.731956481933594	49.7137561711684	48.8495209224076	CC(=O)N1C2CCCC1C=C(CN3CCC(CC3)Nc4cnc5ccccc5n4)C2
444	CHEMBL1784348	train	2.0	36.84356804677881	23.921597510373445	21.97671890258789	44.74665392245801	31.87213459554954	CC(=O)N1CCC(CS(=O)(=O)N2CCC(CCc3c(C)onc3C)CC2)(CC1)N(O)C=O
445	CHEMBL2070948	train	2.0	65.92256187103075	24.173782771535578	54.04484558105469	109.59227724505409	63.43336686716877	CC(C)(C#N)c1cnc(s1)N2CCN(CC2)C(=O)[C@@H]3CCCC[C@H]3C(=O)NC4(CC4)C#N
446	CHEMBL4100995	train	2.0	25.673399648772687	17.316605940594076	23.469310760498047	8.19036234874055	18.66241967465134	CC[C@H]1[C@@H](O)[C@H](C)C(=O)N1c2ccc(C#N)c(Cl)c2
447	CHEMBL4072533	train	2.0	27.225381836042434	19.5	18.44476318359375	3.811848403473069	17.24549835577731	CC[C@H]1[C@@H](O)CC(=O)N1c2ccc(C#N)c(Cl)c2
448	CHEMBL4059588	train	2.0	21.40864813812308	8.322722772277215	10.321161270141602	-2.858341770679162	9.298547602465684	CC[C@H]1[C@@H](O)CC(=O)N1c2ccc(C#N)c(OC)c2
449	CHEMBL1784360	train	2.0	49.36953333305054	24.0	45.18790054321289	17.831275871341663	34.097177436901276	Cc1cc(ccc1CCC2CCN(CC2)S(=O)(=O)CC3(CCOCC3)N(O)C=O)S(=O)(=O)C
450	CHEMBL1784339	test	2.0	38.53618171378124	19.0	44.169395446777344	23.44244522936587	31.287005597481116	Cc1cc(F)ccc1CCC2CCN(CC2)S(=O)(=O)CC3(CCOCC3)N(O)C=O
451	CHEMBL1081654	train	2.0	46.26153914703375	21.6375	33.20205307006836	67.60907475444695	42.177541742887264	Cc1cc(O)ccc1NC(=O)c2cc(NC3CCCCC3)ncn2
452	CHEMBL1784363	train	2.0	18.07030426157457	20.0	37.70462417602539	15.45702014929103	22.807987146722745	Cc1ccccc1CCC2CCN(CC2)S(=O)(=O)CC3(CCOCC3)N(O)C=O
453	CHEMBL1784349	train	2.0	13.694756929072467	12.669488372093015	13.400152206420898	33.480379235122335	18.31119418567718	Cc1ncccc1CCC2CCN(CC2)S(=O)(=O)CC3(CCOCC3)N(O)C=O
454	CHEMBL2010841	train	2.0	71.96691548505528	56.19350000000001	113.54363250732422	148.72441737380566	97.60711634154629	CN(C1CCN(Cc2ccc(cc2)c3noc(C)n3)CC1)C(=O)Cc4ccc(cc4)n5cnnn5
455	CHEMBL2010839	train	2.0	13.783385557729078	20.92916666666667	20.840923309326172	-6.314202368165491	12.309818291389108	CN(C1CCN(Cc2ccc(nc2)C(F)(F)F)CC1)C(=O)Cc3ccc(cc3)n4cnnn4
456	CHEMBL1784351	train	2.0	35.426797227637756	23.76973770491806	12.890772819519043	19.755534954209285	22.960710676571036	CN1CCC(CS(=O)(=O)N2CCC(CCc3c(C)onc3C)CC2)(CC1)N(O)C=O
457	CHEMBL1940312	train	2.0	47.247039706467106	11.591081081081068	58.33487319946289	42.374172769531114	39.88679168913555	CNC(=O)N1CCC(CC1)NC(=O)c2ccc(Oc3ccc(cc3)C#C[C@]4(O)CN5CCC4CC5)cc2
458	CHEMBL2086804	train	2.0	73.4842786077722	69.0	112.92884063720703	86.24015883802716	85.4133195207516	COc1c(C(=O)NC2CCNCC2)n(C)c3c4ccccc4N(CC(=O)c5ccccc5)C(=O)c13
459	CHEMBL2163349	train	2.0	43.781382184674214	24.55	45.12987518310547	36.63224221161113	37.523374894847706	CS(=O)(=O)c1ccc2c3CN(CCc3[nH]c2c1)C(=O)[C@@H]4CCCC[C@H]4C(=O)NC5(CC5)C#N
460	CHEMBL2070947	train	2.0	51.92880131693743	20.0	37.74483108520508	53.763639526580384	40.85931798218073	CS(=O)(=O)c1ccc2nc(sc2c1)N3CCN(CC3)C(=O)[C@@H]4CCCC[C@H]4C(=O)NC5(CC5)C#N
461	CHEMBL1272178	test	2.0	23.77398841067297	21.34	25.455825805664062	8.70959468709417	19.8198522258578	Nc1oc2cccc(C(=O)N[C@@H]3CN4CCC3CC4)c2n1
462	CHEMBL552341	train	2.0	32.60313796257574	18.0	21.902135848999023	27.388682090902794	24.97348897561939	NS(=O)(=O)c1cccc(CN(C2CCNCC2)c3ccc4[nH]ccc4c3)c1
463	CHEMBL1940280	train	2.0	13.279663636415364	7.375324675324675	19.18199348449707	13.40703871178116	13.311005127004568	O[C@]1(CN2CCC1CC2)C#Cc3ccc(Oc4ccc(cc4)C(=O)Nc5ccccn5)cc3
464	CHEMBL1940315	train	2.0	12.205644210966307	23.0	18.968095779418945	13.389663432798875	16.89085085579603	O[C@]1(CN2CCC1CC2)C#Cc3ccc(Oc4ccc(cc4)C(=O)NC5CCCS(=O)(=O)C5)cc3
465	CHEMBL1940316	train	2.0	25.658899235000032	21.0	98.70909881591797	23.466371758842037	42.20859245244001	O[C@]1(CN2CCC1CC2)C#Cc3ccc(Oc4ccc(cc4)C(=O)NC5CCS(=O)(=O)C5)cc3
466	CHEMBL1940281	train	2.0	14.629856594189794	6.671777777777778	4.265053749084473	14.338273298830675	9.976240354970681	O[C@]1(CN2CCC1CC2)C#Cc3ccc(Oc4ccc(cc4)C(=O)NCc5ccccc5)cc3
467	CHEMBL1796298	train	2.0	15.971729128912505	20.253196347031963	6.111189842224121	7.405807574814784	12.435480723245842	O[C@]1(CN2CCC1CC2)C#Cc3ccc(Oc4ccc(cc4)C(=O)NCc5ccncn5)cc3
468	CHEMBL3670640	train	2.0	8.210053585760585	11.69994444444444	6.237283706665039	6.530587685161058	8.16946735550778	O=C(N1CC(C1)Oc2ccc(CN3CC4(CCOC4)C3)cc2)c5oc(nn5)c6ccccc6
469	CHEMBL2070937	train	2.0	23.8158685126717	17.868000000000002	10.292625427246094	42.300035690830654	23.569132407687114	O=C(NC1(CC1)C#N)[C@@H]2CCCC[C@H]2C(=O)N3CCN(CC3)c4nc5ccccc5s4
470	CHEMBL2070949	test	2.0	15.76630061195132	7.760921722113503	9.215119361877441	20.603141136744483	13.336370708171687	O=C(NC1(CC1)C#N)[C@@H]2CCCC[C@H]2C(=O)N3CCN(CC3)c4nc5cccnc5s4
471	CHEMBL2071095	test	2.0	15.76630061195132	7.760921722113503	9.215119361877441	20.603141136744483	13.336370708171687	O=C(NC1(CC1)C#N)[C@@H]2CCCC[C@H]2C(=O)N3CCN(CC3)c4nc5ncccc5s4
472	CHEMBL2164672	train	2.0	70.92380569289044	25.99	77.34989166259766	67.32157908198823	60.39631910936908	O=C(NCC#N)[C@@H]1CCCC[C@H]1C(=O)N2CCCCC2
473	CHEMBL3260492	train	2.0	28.660942466269308	19.0	29.219463348388672	48.85607624677695	31.43412051535873	Oc1cc(O)c(cc1Nc2ccccc2)C(=O)N3Cc4ccccc4C3
474	CHEMBL2386653	train	2.0	16.208829418130872	7.771428571428571	6.401819705963135	29.99368421867809	15.093940478550167	C[C@@H](O)c1nc2cnc3[nH]ccc3c2n1[C@H]4CCCOC4
475	CHEMBL3188386	train	2.0	42.364330281769725	24.55	51.02097702026367	46.9202268707495	41.21388354319572	Cc1cc(ccn1)c2ncc(CC(=O)Nc3ccc(cn3)c4cnccn4)cc2C
476	CHEMBL1078985	train	2.0	55.707533299999994	18.0	36.52291488647461	29.992658952390656	35.055776784716315	Clc1ncn2c1Cn3ncnc3c4cc(Br)ccc24
477	CHEMBL3109040	train	2.0	50.0915186311469	28.0	44.82189178466797	51.49535286827835	43.60219082102331	COc1cc(ccc1NC(=O)[C@@H]2N[C@@H](CC(C)(C)C)[C@]3([C@H]2c4cccc(Cl)c4F)C(=O)Nc5cc(Cl)sc35)C(=O)N
478	CHEMBL2393172	train	2.0	30.846376377730312	19.13335877862596	27.817657470703125	31.10221861138156	27.22490280961024	O[C@@H]1CC[C@H](CC1)NS(=O)(=O)c2ccc(NC(=O)NCc3cccnc3)cc2
479	CHEMBL2393164	train	2.0	27.945728577856585	19.0	8.588896751403809	6.577390783597873	15.528004028214566	O=C(NCc1cccnc1)Nc2ccc(cc2)S(=O)(=O)N3CCC4(CCNCC4)C3
480	CHEMBL2037499	train	2.0	25.028191587077508	28.0	16.553815841674805	21.960686406637564	22.88567345884747	CC[C@H](C)[C@H]1N([C@@H](C(=O)N(C)C)c2ccc(C)nc2)C(=O)[C@H](NC1=O)C3Cc4ccccc4C3
481	CHEMBL496606	train	2.0	14.917381752903632	3.7418604651162823	4.414779186248779	-12.755815042991763	2.579551590319232	Cc1cccc(C)c1CNc2cc(cn3c(C)c(C)nc23)n4cncn4
482	CHEMBL1834684	train	2.0	52.56209664968403	32.36	40.883724212646484	6.435193466861406	33.060253582297975	Fc1cc(F)cc(NC(=O)CN(CC2CCC2)C(=O)c3ccc(cc3)c4ccccn4)c1
483	CHEMBL1796293	train	2.0	8.523401372981125	19.224444444444444	8.727120399475098	3.572165006504492	10.01178280585129	O=C(NCc1ccncc1)c2ccc(Oc3ccccc3C#N)cc2
484	CHEMBL3393063	train	2.0	24.573499241741832	26.85398230088495	8.367476463317871	41.60754675826971	25.350626191053593	O=C(NCc1ccncn1)c2ccc(Oc3ccccc3C#N)cc2
485	CHEMBL526463	train	2.0	28.631370666575645	19.178571428571427	19.946571350097656	6.34099519633005	18.524377160393698	Cc1nn(cc1-c1ccc2c(c1)N(CCO2)c1nc2c(s1)C(=O)NC(C)(C)C2)CCCN
486	CHEMBL263145	train	2.0	6.290107682706183	19.20048951048951	4.901014804840088	5.844249524863142	9.05896538072473	OC(=O)CN1C(=O)C2(CC(=O)N(Cc3cc(F)ccc3Cl)C2=O)c4cc(Cl)ccc14
487	CHEMBL1341270	train	2.03	122.6978391038413	51.0	54.367408752441406	95.2970475709898	80.84057385681814	CN1C(=O)N(C)C2=C(C1=O)C(NC(=N2)c3ccc(Cl)cc3)(C(F)(F)F)C(F)(F)F
488	CHEMBL2386626	train	2.1	2.689575621177946	18.930590027700852	1.3342885971069336	1.404000657096057	6.089613725770446	C[C@@H](O)c1nc2cnc3[nH]ccc3c2n1[C@@H]4CC[C@H](O)CC4
489	CHEMBL1241642	train	2.1	106.06003744357962	50.086666666666666	67.05888366699219	69.13935071240034	73.0862346224097	Cc1ccc2c(cccc2n1)N3CCN(CCc4cccc5c4OCc6cncn56)CC3
490	CHEMBL469375	train	2.1	30.961533732071867	18.85714285714286	44.65319061279297	48.4875130006388	35.73984505066163	CN1C(=O)COc2c(CCCN3CCN(CC3)c4cccc5nc(C)ccc45)cccc12
491	CHEMBL4087412	train	2.2	57.32143780546542	19.0	41.20460510253906	47.15220085776331	41.16956094144195	Cc1cc(C2CCCN(C2)C(=O)c3ccc4CCOc4c3)n5ncnc5n1
492	CHEMBL4099983	train	2.2	85.90162108743985	57.0	49.99304962158203	63.78277037642127	64.16936027136079	CN(Cc1cnc2nc(N)nc(NC(=O)OCc3ccc(cc3)B(O)O)c2n1)c4ccc(cc4)C(=O)N[C@@H](CCC(=O)O)C(=O)O
493	CHEMBL598215	train	2.2	15.701611669830186	18.0	16.008934020996094	60.58013693021526	27.572670655260385	COC[C@@H]1[C@H]2CNC[C@@]12c3ccc4ccccc4c3
494	CHEMBL514691	train	2.2	50.14555846082806	19.900000000000002	29.144983291625977	24.403384427319033	30.898481544943266	Cc1nc2cc(NC(=O)c3ccc(nc3C)c4ccc(F)cc4)ccc2s1
495	warfarin	train	2.2	50.63450974670764	11.869278350515458	25.149463653564453	-2.705903262058383	21.23683712218229	CC(=O)CC(C1=CC=CC=C1)C2=C(O)C3C(=CC=CC=3)OC2=O
496	CHEMBL2179707	train	2.3	66.30839037008934	25.0	64.95292663574219	53.443283459928224	52.42615011643994	CC(C)n1nc(C(=O)NCC2CCN(CCc3ccc(cc3)C(=O)O)CC2)c4ccccc14
497	CHEMBL3261480	train	2.3	25.7514935888889	12.546110843091308	-2.954102039337158	15.216315223278215	12.639954403980315	Cc1cn2CCN([C@@H]3CN4CCC3CC4)C(=O)c5cc(Cl)cc1c25
498	CHEMBL2386651	test	2.3	2.227894545454545	4.976505376344092	2.3403632640838623	3.90783389411997	3.3631492700006174	C[C@@H](O)c1nc2cnc3[nH]ccc3c2n1C4CCOCC4
499	CHEMBL222860	train	2.3	64.39618943430409	12.67	30.705299377441406	27.2003221948681	33.7429527516534	O=C1NC(CN1C2CCN(Cc3ccccc3)CC2)(c4cccs4)c5cccs5
500	CHEMBL1242436	train	2.3	9.385681208142255	23.0	-0.28930628299713135	-11.056091234748568	5.26007092259914	Cc1ccc2c(cccc2n1)N3CCN(CCc4cccc5c4OCc6c(ncn56)C(=O)N7CCC7)CC3
501	CHEMBL4063006	train	2.3	35.05731781516922	16.951249999999998	58.971492767333984	80.5575958865127	47.884414117253975	Cn1nccc1c2ccc(OCc3ccccc3)c(c2)C(=O)Nc4cccnc4
502	CHEMBL2431078	train	2.4	62.03860484848486	18.0	33.764122009277344	9.6333818231084	30.859027170217647	Cc1noc2[C@H](CC(=O)N)N=C(c3ccccc3)c4c(C)c(C)sc4c12
503	CHEMBL2071097	train	2.4	13.411051545065822	8.363999999999999	57.386775970458984	-10.179568934177484	17.24556464533683	O=C(NC1(CC1)C#N)[C@@H]2CCCC[C@H]2C(=O)N3CCN(CC3)c4nc5CCOCc5s4
504	CHEMBL3623019	train	2.4	9.5201742036349	20.133477407407405	18.17724609375	8.886271725097913	14.179292357472555	CNC(=O)C1Cc2ccccc2N1C(=O)COc3ccc(C)cc3
505	CHEMBL516551	test	2.4	52.52305789923429	20.0	68.23872375488281	97.92490964148053	59.67167282389941	C[C@@H]1CN(Cc2ccc(cc2)c3ccccc3CN(C)C(=O)Cc4onc(C)c4)C[C@H](C)N1
506	CHEMBL1818455	train	2.4	48.97770172672672	20.11111111111111	7.013896465301514	46.943431019676126	30.76153508070387	Cc1cc(C)n(CC23CNCC[C@@]2(C3)c4ccc(Cl)c(Cl)c4)n1
507	CHEMBL469345	train	2.4	4.847690895927116	7.646000000000001	15.535862922668457	-16.497229247658517	2.883081142734264	CN1C(=O)COc2c(CCN3CCN(CC3)c4cccc5nc(C)ccc45)cccc12
508	CHEMBL1631007	train	2.4	64.36751134059108	28.0	54.98237228393555	7.877959016297839	38.806960660206116	C[C@H](Oc1ccc(cc1C(=O)N2Cc3ccc(Cl)cc3C2)S(=O)(=O)C)C(F)(F)F
509	CHEMBL1940310	test	2.5	15.245815247249777	12.709999999999999	-7.381342887878418	4.870588812801535	6.361265293043223	CC(=O)N1CCC(CC1)NC(=O)c2ccc(Oc3ccc(cc3)C#C[C@]4(O)CN5CCC4CC5)cc2
510	CHEMBL370387	test	2.5	21.991454854973973	20.5	17.261402130126953	11.738755936423258	17.872903230381045	Nc1nc2nc(SCc3cccc(F)c3F)nc(O)c2s1
511	CHEMBL1940314	train	2.5	27.72897943849277	10.25774647887324	35.719539642333984	8.45227858326217	20.539636035740543	O[C@]1(CN2CCC1CC2)C#Cc3ccc(Oc4ccc(cc4)C(=O)NC5CCS(=O)(=O)CC5)cc3
512	CHEMBL3427276	train	2.5	57.73337266343729	25.753061224489798	22.051681518554688	25.322811016870453	32.715231605838056	CS(=O)(=O)CCc1c(CN2C(=O)N(C3CC3)c4ccncc24)nc5cc(Cl)ccn15
513	CHEMBL1289038	train	2.5	19.272822704861355	10.0	12.446861267089844	6.7315011060260925	12.112796269494323	Brc1ccc2[nH]c(nc2c1)N3CCC4(CC3)CN(C(=O)O4)c5ccccc5
514	CHEMBL1818452	train	2.5	15.584654193616577	15.85	13.805547714233398	22.685363416718193	16.981391331142042	Cc1ccnn1CC23CNCC[C@@]2(C3)c4ccc(Cl)c(Cl)c4
515	hexobarbital	train	2.56	70.39402689873417	26.0	94.73855590820312	75.4934271307083	66.6565024844114	C1CC=C(CC1)C2(C)C(=O)N(C)C(=O)NC2=O
516	CHEMBL1940308	train	2.6	20.070805672014703	17.0	24.4451847076416	-41.695387910483056	4.955150617293311	CN1CCC(CC1)NC(=O)c2ccc(Oc3ccc(cc3)C#C[C@]4(O)CN5CCC4CC5)cc2
517	CHEMBL2382402	train	2.6	30.179004868537113	19.333333333333332	12.486017227172852	0.22118413418134222	15.55488489080616	CC(SC1=NC(=C(C#N)C(=O)N1)c2ccc(Cl)c(Cl)c2)C(=O)Nc3ccc(cc3)S(=O)(=O)N
518	CHEMBL2382401	train	2.6	27.725993379157	17.678947368421053	8.787808418273926	11.188899626206297	16.345412198014568	CC(SC1=NC(=C(C#N)C(=O)N1)c2ccc(Cl)cc2)C(=O)Nc3ccc(cc3)S(=O)(=O)N
519	CHEMBL2431048	train	2.6	202.72575	69.1	206.95123291015625	110.26635737419306	147.2608350710873	Cl.COc1ccccc1OCCNCCCCN2C(=O)C3CCCN3C2=O
520	CHEMBL3623005	train	2.6	7.397916004990833	5.0	2.8464488983154297	3.4198371793926445	4.666050520674727	CNC(=O)C1Cc2ccccc2N1C(=O)COc3ccc(Cl)cc3
521	CHEMBL3105228	train	2.6	80.2051812301915	52.3	116.86559295654297	105.44263073746754	88.7033512310505	Fc1ccc(cc1F)C(=O)N2CCN3C(=O)c4ccccc4[C@@]23c5ccc(Cl)cc5
522	CHEMBL473921	train	2.6	52.606894117183565	18.0	26.07065200805664	42.17870101493437	34.71406178504365	C[C@@H]1CN(Cc2ccc(cc2)c3cccnc3C(=O)N4CCC(CC4)Nc5ccc(F)cc5)C[C@H](C)N1
523	CHEMBL1649675	train	2.6	43.431315931914696	15.746153846153845	22.14740753173828	42.084028704132585	30.85222650348485	CC(=O)Cc1ccc(cc1)n2nc(c3CCCCc23)C(F)(F)F
524	CHEMBL1818445	train	2.6	63.952374999999954	17.3712664	3.824043035507202	49.86597832414199	33.75341568991229	Cc1csc(n1)C23CNCC[C@@]2(C3)c4ccc(Cl)c(Cl)c4
525	CHEMBL1257335	train	2.6	84.74033446850561	57.666666666666664	71.87994384765625	28.955574633846208	60.81062990416868	Cc1ncoc1c2nnc(SCCCNC3CC4CC4(C3)c5ccccc5)n2C
526	CHEMBL1940291	test	2.7	37.408429295734464	15.14436781609196	52.04958724975586	35.92343931395398	35.131455918884065	CN(Cc1onc(C)c1)C(=O)c2ccc(Oc3ccc(cc3)C#C[C@]4(O)CN5CCC4CC5)cc2
527	CHEMBL2397482	train	2.7	124.34614545454546	57.0	116.35957336425781	122.97765764966577	105.17084411711727	CN[C@@H](Cc1ccccc1)C(=O)N[C@@H](Cc2ccccc2)C(=O)N
528	CHEMBL1940287	train	2.7	58.01923727763992	60.0	30.813720703125	40.82947873621349	47.4156091792446	COc1ccc(CNC(=O)c2ccc(Oc3ccc(cc3)C#C[C@]4(O)CN5CCC4CC5)cc2)cc1OC
529	CHEMBL1080472	train	2.7	4.970132624019165	6.542751106259099	5.919365406036377	2.8269193372577597	5.0647921183931	Cc1cccc(C)c1CNc2nc(cc3c(C)c(C)[nH]c23)N4C=CC=CC4=O
530	CHEMBL1242167	train	2.7	42.51838238323068	31.892105263157884	23.992643356323242	6.915001320686806	26.329533080849654	Cc1ccc2c(cccc2n1)N3CCN(CCc4cccc5c4OCc6c(ncn56)C(=O)NC7CCC7)CC3
531	CHEMBL1801460	train	2.7	47.944368531450266	28.02432915921288	32.50689697265625	20.341959294007413	32.204388489331706	Cn1c(CC(=O)NCc2ccc(F)cc2Cl)cnc1c3ccc(F)cc3F
532	perfluorooctanesulfonamide (FOSA)	train	2.75	99.2943	51.1	50.87256622314453	40.53382713590622	60.45017333976269	NS(=O)(=O)C(F)(F)C(F)(F)C(F)(F)C(F)(F)C(F)(F)C(F)(F)C(F)(F)C(F)(F)F
533	CHEMBL2376321	train	2.8	56.2918870068305	19.670444444444374	12.157196044921875	-0.7557791354360645	21.840937090190174	CC[C@]1(C)NC(=O)c2cc(ccc2NC1=O)S(=O)(=O)Nc3ccc(OC(F)F)cc3
534	CHEMBL3787261	train	2.8	53.78174944638809	22.764733333333375	33.326080322265625	57.38907120426039	41.815408576561865	COc1ccc(cc1)c2oc(nn2)C(=O)N3CC(C3)Oc4ccc(CN5CCC(C)(O)C5)cc4
535	CHEMBL3084777	train	2.8	44.97869287030976	23.185	50.82868957519531	79.15581310691071	49.537048888103946	COc1ccccc1c2oc3cccc(C(=O)N[C@@H]4C[C@H]5CCC[C@@H](C4)N5C)c3n2
536	CHEMBL1081504	train	2.8	19.41231824552187	8.604555555555566	19.065467834472656	18.531593739560407	16.403483843777625	Cc1cccc(C)c1CNc2ncnc3c(C)c(C)[nH]c23
537	CHEMBL2382404	train	2.8	22.534477052544077	23.0	5.310879230499268	6.120657883897852	14.241503541735298	CCC(SC1=NC(=C(C#N)C(=O)N1)c2ccc(Cl)cc2)C(=O)Nc3ccc(cc3)S(=O)(=O)N
538	CHEMBL4084470	test	2.8	39.57090106443319	20.76875	32.87746047973633	25.199342433761114	29.604113494482657	Brc1ccc(OCc2ccccc2)c(c1)C(=O)Nc3cccnc3
539	CHEMBL1632210	train	2.8	60.049827588317754	33.0	38.23904037475586	60.12783925071461	47.854176803447054	Cc1ccc2c(cccc2n1)N3CCN(CCc4cccc(NC(=O)c5ccccc5)c4)CC3
540	CHEMBL1242345	train	2.8	38.99379333358324	33.6	32.6751708984375	17.274912767469033	30.635969249872446	Cc1ccc2c(cccc2n1)N3CCN(CCc4cccc5c4OCc6c(ncn56)C(=O)NCC7CC7)CC3
541	CHEMBL3736206	train	2.87	43.68141349679567	27.75	7.133976459503174	36.66034825911093	28.806434553852444	Nc1ncc(cn1)c2nc(nc3N(CCc23)c4ccc(cc4F)C(=O)N5CCOCC5)N6CCOCC6
542	CHEMBL1940309	train	2.9	43.20677908643045	25.0	18.233911514282227	50.658956597986275	34.27491179967474	CS(=O)(=O)N1CCC(CC1)NC(=O)c2ccc(Oc3ccc(cc3)C#C[C@]4(O)CN5CCC4CC5)cc2
543	CHEMBL1940293	train	2.9	5.884196878402153	8.746666666666664	-8.51528549194336	-5.780369798246252	0.08380206371980137	O[C@]1(CN2CCC1CC2)C#Cc3ccc(Oc4ccc(cc4)C(=O)NC5CCCCC5)cc3
544	CHEMBL3628112	train	2.9	60.81957947840396	15.181777777777775	64.70308685302734	58.52085970868639	49.80632595447386	Cc1ccoc1C(=O)Nc2ccc(N3C(=O)c4ccc(Cl)cc4C3=O)c(Cl)c2
545	CHEMBL2386648	test	2.9	48.855395588888875	10.0	-6.285242080688477	5.31207430187294	14.470556952518335	CCN1CCC(n2c(nc3cnc4[nH]ccc4c23)[C@@H](C)O)C(F)(F)C1
546	CHEMBL3427274	train	2.9	96.47591976017287	43.307537537537534	75.60214233398438	59.28327085556557	68.66721762181508	OCCNC(=O)CCc1c(CN2C(=O)N(C3CC3)c4ccncc24)nc5cc(Cl)ccn15
547	CHEMBL496806	train	2.9	50.58343609487758	20.22529145728643	28.070690155029297	8.821884641422498	26.925325587153953	Cc1cccc(C)c1CNc2cc(cn3c(C)c(C)nc23)C4=CNC(=O)NC4=O
548	CHEMBL496400	train	2.9	2.992695604012644	10.0	2.7940025329589844	-12.572217406562483	0.8036201826022862	Cc1cccc(C)c1CNc2cc(cn3c(C)c(C)nc23)N4CCCCC4=O
549	CHEMBL453246	train	2.9	12.552830926866978	7.6	-1.8858060836791992	-4.431523199381666	3.458875410951528	Cc1cccc(C)c1CNc2cc(cn3c(C)c(C)nc23)n4cccn4
550	CHEMBL1649674	train	2.9	61.37279136624993	19.6975	45.64906311035156	38.602704209176984	41.33051467144462	Fc1cc(ccc1CN2CCCC2=O)n3nc(c4CCCCc34)C(F)(F)F
551	CHEMBL1834681	test	2.9	5.900701157480696	2.355188888888889	2.0898308753967285	9.75202837170065	5.02443732336674	Fc1cc(F)cc(NC(=O)CN(C2CCCOC2)C(=O)c3ccc(cc3)c4ccccn4)c1
552	CHEMBL60066	train	3.0	52.98897462037037	25.0	31.320331573486328	6.933521077714526	29.060706817892807	[O-][n+]1cc(ccc1Cl)C(=O)Nc2ccc(F)cc2
553	CHEMBL403963	train	3.0	57.52279999999999	50.0	85.66584014892578	25.46603925294685	54.66366985046815	C(=C\c1nn[nH]n1)/c2ccccc2
554	CHEMBL364714	train	3.0	14.413914977242296	19.5	24.203481674194336	23.37126873413263	20.372166346392316	C[C@@H](C(=O)N)c1ccc(OS(=O)(=O)C(F)(F)F)cc1
555	CHEMBL190243	train	3.0	55.66828136232593	24.0	33.32422637939453	25.75343332691388	34.68648526715859	C[C@@H](C(=O)NCCN1CCCC1)c2ccc(OS(=O)(=O)C(F)(F)F)cc2
556	CHEMBL189475	test	3.0	48.50913747999999	17.5	27.275920867919922	40.045687805961535	33.33268653847036	C[C@@H](C(=O)NS(=O)(=O)C)c1ccc(OS(=O)(=O)C(F)(F)F)cc1
557	CHEMBL372052	test	3.0	6.069155594017092	23.305699481865286	5.906359672546387	5.997979975927195	10.31979868108899	C[C@@H](C(=O)O)c1cccc(c1)C(=O)c2ccccc2
558	CHEMBL3809024	train	3.0	6.971749933779379	21.0	2.955951690673828	2.014890305520777	8.235647982493496	C[C@@H](N)CN(C)c1ccc(Nc2cc(NC3CC3)n4ncc(C#N)c4n2)cc1NC(=O)C
559	CHEMBL1778656	train	3.0	34.99499078652829	21.847761194029854	40.599884033203125	14.28584145668408	27.93211936761134	C[C@@H](Oc1ccc(cc1c2cccc(c2)C#N)C(F)(F)F)C(=O)O
560	CHEMBL1689125	train	3.0	40.11931281203956	24.333333333333332	32.507774353027344	23.542890540500757	30.125827759725247	C[C@@H]1CN(Cc2cc(Cl)ccc2OCC(=O)O)C[C@H](C)N1C(=O)Cc3ccccc3
561	CHEMBL4085514	test	3.0	17.49570551641048	7.936901408450698	28.772811889648438	-0.263155961904049	13.485565713151392	C[C@@H]1N(C(=O)C[C@]1(C)O)c2ccc(C#N)c(Cl)c2
562	CHEMBL75435	train	3.0	8.237461111111122	22.6	7.954780578613281	8.564945830495002	11.839296880054853	C[C@H](C(=O)O)c1cccc(c1)C(=O)c2ccccc2
563	CHEMBL550436	train	3.0	44.80512042673984	17.80494845360833	32.055755615234375	52.1004524218432	36.69156922935643	C[C@H](CO)N1C=Cc2c(NC(=O)Cc3ccc(Cl)c(c3)C(F)(F)F)cccc2C1=O
564	CHEMBL257027	train	3.0	29.11492733228381	20.428527833333312	12.868290901184082	24.952551301105	21.84107434197655	C[C@H](CO)Nc1nc(SCc2ccccc2)nc3NC(=O)Nc13
565	CHEMBL271012	train	3.0	11.994259723487461	15.804908708010347	11.618123054504395	9.815296782954716	12.30814706723923	C[C@H](CO)Nc1nc(SCc2ccccc2F)nc3NC(=O)Sc13
566	CHEMBL402728	train	3.0	41.68424215590063	21.0	21.94974136352539	27.71586877815727	28.08746307439582	C[C@H](CO)Nc1nc(SCc2csc(C)n2)nc3NC(=O)Sc13
567	CHEMBL390191	train	3.0	40.885191142857146	23.0	13.683781623840332	17.352133602277068	23.730276592243634	C[C@H](CO)Nc1nc(SCc2csc(C)n2)nc3nc(N)sc13
568	CHEMBL3809915	train	3.0	5.7467651453410316	16.34230769230769	2.8797547817230225	4.6945621873636245	7.415847451683842	C[C@H](N)CN(C)c1ccc(Nc2cc(NC3CC3)n4ncc(C#N)c4n2)cc1NC(=O)C
569	CHEMBL4084067	train	3.0	3.9777671261253955	3.1942769230769232	3.4213385581970215	4.460885342501982	3.7635669874753304	C[C@H](N[S@@]1(=O)=NC(=O)c2ccccc12)c3ccccc3
570	CHEMBL4102049	train	3.0	4.177180282941631	6.738461538461539	3.472092628479004	4.982880007209958	4.842653614273033	C[C@H](N[S@]1(=O)=NC(=O)c2ccccc12)c3ccccc3
571	CHEMBL1829783	train	3.0	69.72215062423294	28.214729323308266	79.20624542236328	87.01585108422952	66.0397441135335	C[C@H](N1CC[C@](CCO)(OC1=O)c2ccc(F)cc2)c3ccc(cc3)c4ccc(F)cc4F
572	CHEMBL1916287	train	3.0	46.73583703262449	23.0	63.50780487060547	17.62455099029103	37.717048223380246	C[C@H](NC(=O)c1c(C)nn(c1NS(=O)(=O)c2cccnc2)c3ccc(F)cc3)C(C)(C)C
573	CHEMBL1934421	train	3.0	49.28430616595967	23.921597510373445	52.121456146240234	23.968486025475872	37.323961462012306	C[C@H](NC(=O)c1c(C)nn(C2CCN(CC(F)(F)F)CC2)c1NS(=O)(=O)c3ccc(C)cc3)C(C)(C)C
574	CHEMBL1934419	test	3.0	39.9664804099964	30.085417757009342	28.31548309326172	16.839973773527614	28.80183875844877	C[C@H](NC(=O)c1c(C)nn(C2CCS(=O)(=O)CC2)c1NS(=O)(=O)c3ccc(C)cc3)C(C)(C)C
575	CHEMBL3940724	train	3.0	17.405779946892686	20.695238095238103	10.517824172973633	17.59290293836211	16.55293628836663	C[C@H](NC(=O)c1noc(C)n1)[C@H](Oc2ccc3c(cnn3c4ccc(F)cc4)c2)c5ccccc5
576	CHEMBL3977631	train	3.0	50.925149319280564	25.0	56.11058807373047	30.43440969003183	40.617536770760715	C[C@H](NS(=O)(=O)C1CC1)[C@H](Oc2ccc3c(cnn3c4ccc(F)cc4)c2)c5ccc(cc5)S(=O)(=O)C
577	CHEMBL1689133	train	3.0	43.76804671502535	19.138827586206894	47.28202819824219	21.90858892865733	33.024372857032944	C[C@H](Oc1ccc(Cl)cc1CN2CCN([C@@H](C)C2)C(=O)Cc3ccc(Cl)cc3)C(=O)O
578	CHEMBL1689135	test	3.0	28.854007614932502	12.759533799533804	5.7652587890625	31.365621947235375	19.686105537691045	C[C@H]1CN(Cc2cc(Cl)ccc2CC(=O)O)CCN1C(=O)Cc3ccc(Cl)cc3
579	CHEMBL1689137	train	3.0	27.084028100826178	20.680531914893614	33.30538558959961	46.712368275355786	31.945578470168797	C[C@H]1CN(Cc2cc(Cl)ccc2CC(=O)O)CCN1S(=O)(=O)Cc3ccccc3
580	CHEMBL1689136	train	3.0	36.08338205366747	24.51303030303031	28.24053382873535	43.76170190484903	33.14966202257054	C[C@H]1CN(Cc2cc(Cl)ccc2CCC(=O)O)CCN1C(=O)Cc3ccccc3
581	CHEMBL1689134	train	3.0	31.8070251501821	21.625	11.420395851135254	20.076759205794225	21.232295051777896	C[C@H]1CN(Cc2cc(Cl)ccc2OC(C)(C)C(=O)O)CCN1S(=O)(=O)c3ccccc3
582	CHEMBL1689128	train	3.0	7.833197302941773	15.68358490566038	8.771051406860352	12.964072684377635	11.312976574960034	C[C@H]1CN(Cc2cc(Cl)ccc2OCC(=O)O)CCN1C(=O)Cc3ccc(Cl)cc3
583	CHEMBL1689127	train	3.0	4.876745795365	20.0	3.4643073081970215	-0.7859880706820723	6.888766258219987	C[C@H]1CN(Cc2cc(Cl)ccc2OCC(=O)O)CCN1C(=O)Cc3ccc(F)cc3
584	CHEMBL1689130	train	3.0	19.323865817683714	16.254999999999995	10.247852325439453	13.835232739482286	14.915487720651361	C[C@H]1CN(Cc2cc(Cl)ccc2OCC(=O)O)CCN1C(=O)Cc3cccc(Cl)c3
585	CHEMBL1689126	test	3.0	16.674384023950243	10.009553947368428	0.13041383028030396	18.686053681648556	11.375101370811883	C[C@H]1CN(Cc2cc(Cl)ccc2OCC(=O)O)CCN1C(=O)Cc3ccccc3
586	CHEMBL4075638	train	3.0	58.93337619013519	19.642857142857142	39.56011199951172	30.846650135783754	37.24574886707195	C[C@H]1Cn2cc(cc2C(=O)N1Cc3cccc(C)n3)c4nc(Nc5ccnn5C)ncc4C
587	CHEMBL1900528	test	3.0	8.850246550534342	7.8	7.966507911682129	10.325279022925088	8.73550837128539	C[N+]1(C)[C@@H]2C[C@H](C[C@H]1[C@@H]3O[C@H]23)OC(=O)C(O)(c4cccs4)c5cccs5
588	CHEMBL1201335	train	3.0	50.712469384798524	22.0	58.98729705810547	33.49419438205193	41.29849020623898	C[N+]1(C)CCC(C1)OC(=O)C(O)(C2CCCC2)c3ccccc3
589	CHEMBL15770	train	3.0	33.80788509360698	9.5	2.462785482406616	32.16127413171058	19.482986176931043	C[S+]([O-])c1ccc(\C=C/2\C(=C(CC(=O)O)c3cc(F)ccc23)C)cc1
590	CHEMBL315708	train	3.0	64.21988333333333	27.38999999999997	59.06637191772461	29.742369281924802	45.104656133245676	c1ccc(cc1)c2[nH]nc3ccccc23
591	CHEMBL3809288	train	3.0	27.23525180618188	20.0	6.498700141906738	4.945364611660931	14.669829139937388	CC(=O)Nc1cc(Nc2cc(NC3CC3)n4ncc(C#N)c4n2)ccc1N5CC[C@@H](N)C5
592	CHEMBL3810252	test	3.0	6.611567038426397	17.78	3.8140928745269775	5.649407056982902	8.463766742484069	CC(=O)Nc1cc(Nc2cc(NC3CC3)n4ncc(C#N)c4n2)ccc1N5CC[C@H](N)C5
593	CHEMBL3808817	train	3.0	5.792922824551486	19.83636363636364	3.1096997261047363	1.1497718979989888	7.4721895212547125	CC(=O)Nc1cc(Nc2cc(NC3CC3)n4ncc(C#N)c4n2)ccc1N5CCC[C@@H](N)C5
594	CHEMBL3809526	train	3.0	5.751441007810931	8.0	3.147792339324951	4.629272316319704	5.382126415863897	CC(=O)Nc1cc(Nc2cc(NC3CC3)n4ncc(C#N)c4n2)ccc1N5CCC[C@H](N)C5
595	CHEMBL1917449	test	3.0	82.63169706796717	21.898749999999964	58.25173568725586	2.2272702063573644	41.25236324039509	CC(=O)Nc1cccc2c1c(c(C)n2CC(=O)O)S(=O)(=O)c3ccc(Cl)cc3
596	CHEMBL956	test	3.0	21.11928883644133	21.0	23.10938835144043	30.887843623271493	24.029130202788313	CC(C(=O)O)c1ccc(cc1)C(=O)c2cccs2
597	CHEMBL1917421	train	3.0	47.61216464621212	12.669488372093015	26.663345336914062	73.16419951967413	40.02729946872333	CC(C(=O)O)n1c(C)c(Sc2ccc(Cl)cc2)c3cc(Cl)ccc13
598	CHEMBL914	train	3.0	150.59608288912656	77.525	80.28373718261719	98.19909602277545	101.6509790236298	CC(C)(C(=O)O)c1ccc(cc1)C(O)CCCN2CCC(CC2)C(O)(c3ccccc3)c4ccccc4
599	CHEMBL1951575	train	3.0	93.99967585921326	28.0	77.36605834960938	124.54087853066083	80.97665318487087	CC(C)(C)NC(=O)c1ccc(Oc2cc(F)c(CC(=O)O)cc2Cl)c(NS(=O)(=O)c3ccc(cc3Cl)C4CC4)c1
600	CHEMBL714	train	3.0	43.32648816816819	27.0	36.183528900146484	-7.905632628485725	24.65109610995724	CC(C)(C)NCC(O)c1ccc(O)c(CO)c1
601	CHEMBL2059909	train	3.0	3.661600000000001	4.0	3.7939963340759277	6.562878206811735	4.504618635221916	CC(C)(C)NS(=O)(=O)c1cncc(c1)c2ccc3nc(N)nn3c2
602	CHEMBL153370	train	3.0	3.2888405882352942	3.4323333333333337	2.9128715991973877	3.18961646517127	3.2059154964843213	CC(C)C[C@H](NC(=O)N1CCOCC1)C(=O)NCC#N
603	CHEMBL379866	train	3.0	3.8924193979223403	3.918947368421051	3.391653299331665	1.4914113335923909	3.173607849816862	CC(C)c1nnc2ccc(cn12)c3ocnc3c4cc(F)ccc4F
604	CHEMBL1164729	test	3.0	3.4278382352941184	3.0312903225806447	3.2301223278045654	2.7464032649788757	3.108913537664551	CC(C)COc1ccc(cc1C#N)c2nc(C)c(s2)C(=O)O
605	CHEMBL1257850	test	3.0	3.8967813226628447	3.6	3.6766915321350098	2.1562194421961705	3.3324230742485064	CC(C)N1CCC(CC1)Oc2ccc3c(c2)cc4C(=O)N[C@@H](C)Cn34
606	CHEMBL244936	test	3.0	3.7898166666666664	4.0	3.239335298538208	1.8694855797892678	3.2246593862485358	CC(C)N1CCC[C@H](CN2C(=Nc3ccc(cc3C2=O)c4ccc(Cl)cc4)C)C1
607	CHEMBL2031466	test	3.0	3.7408738095238077	3.5	3.2824997901916504	2.2155602641235923	3.184733465959763	CC(C)NC(=O)c1ccc(C)c(c1)N2C=Nc3ccc(cc3C2=O)N4CCN(C)CC4
608	CHEMBL98760	test	3.0	3.5401352941176483	3.5	3.828561305999756	6.74492687006752	4.4034058675462315	CC(C)NC(=O)c1ccc2c(Nc3ccc(Cl)cc3)nc(nc2c1)N4CCOCC4
609	CHEMBL423	train	3.0	4.412929411764706	3.8	1.9243391752243042	24.985742797259878	8.78075284606222	CC(C)NCC(O)COc1ccc(CCOCC2CC2)cc1
610	CHEMBL254370	train	3.0	3.333803571428571	4.0	3.383944272994995	1.5523626178487504	3.0675276155680793	CC[C@@H](NC1=C(Nc2cccc(C(=O)N(C)C)c2O)C(=O)C1=O)c3ccccc3
611	CHEMBL216981	train	3.0	3.4206231601731605	3.0	3.375295877456665	2.29811454620625	3.023508395959019	CC[C@@H](NC1=C(Nc2cccc(C(=O)N(C)C)c2O)C(=O)C1=O)c3oc(C)cc3
612	CHEMBL1144	train	3.0	3.7928905882352932	3.9	4.061659812927246	4.118353050014182	3.9682258627941804	CC[C@H](C)C(=O)O[C@H]1C[C@H](O)C=C2C=C[C@H](C)[C@H](CC[C@@H](O)C[C@@H](O)CC(=O)O)[C@@H]12
613	CHEMBL2036958	train	3.0	3.8789999999999996	3.025	3.602576732635498	20.669508267292606	7.794021249982026	CC1(CCCC2=CC(=O)OC3=C2C(=O)NC(=O)N3)CC1
614	CHEMBL1110	train	3.0	3.9731700000000005	3.90625	3.6896915435791016	13.71265360512277	6.320441287175468	Cc1[nH]cnc1CN2CCc3c(C2=O)c4ccccc4n3C
615	CHEMBL591589	train	3.0	3.8549023809523812	4.0	3.689537286758423	3.1513496464500723	3.673947328540219	CC1=C(C)C(=NNC1=O)Cc2ccc(F)c(c2)C(=O)N3CCN(CC3)C(=O)[C@@]4(C)CCN4
616	CHEMBL70972	train	3.0	3.322750369220152	4.0	3.596010446548462	3.7706473972076497	3.672352053244066	CC1=C(C)C(=O)C(=C(C)C1=O)C(CCCCCC(=O)O)c2ccccc2
617	CHEMBL1917450	train	3.0	4.0672	3.4	4.255146026611328	9.024662992467647	5.186752254769743	Cc1c(c2c(NS(=O)(=O)C)cccc2n1CC(=O)O)S(=O)(=O)c3ccc(Cl)cc3
618	CHEMBL1917447	train	3.0	3.3650690476190475	3.66	3.2908337116241455	3.4969757107769923	3.4532196175050465	Cc1c(c2cc(F)ccc2n1CC(=O)O)S(=O)(=O)c3ccc(Cl)cc3
619	CHEMBL2181808	train	3.0	3.421666666666667	3.0	3.8395068645477295	0.39816454883995805	2.6648345200135886	Cc1c(CC(=O)O)c2cc(F)ccc2n1Cc3nc4ccccc4s3
620	CHEMBL560993	train	3.0	3.3646666666666674	3.0	3.381762981414795	2.8548946344286352	3.1503310706275247	Cc1c(Cc2ccc3ccccc3n2)c4cc(F)ccc4n1CC(=O)O
621	CHEMBL2158790	train	3.0	3.2370000000000005	3.0	3.268545627593994	1.8520612042267148	2.839401707955177	Cc1c(Cl)c(Cl)ccc1OC2CCN(CC3CCN(CC3)[C@@](C)(Cc4ccc(F)cc4)C(=O)O)CC2
622	CHEMBL2158784	train	3.0	3.1816999999999998	3.1606382978723393	3.702251672744751	3.0358804779015833	3.2701176121296682	Cc1c(Cl)c(Cl)ccc1OC2CCN(CC3CCN(CC3)[C@@H](Cc4ccc(F)cc4)C(=O)O)CC2
623	CHEMBL2207283	train	3.0	3.395	3.0	3.533338785171509	3.378499404602625	3.3267095474435333	Cc1c(Cl)ccc(OC2CCN(C[C@H](O)CNC(=O)C3=CNC(=O)c4ccc(cc34)S(=O)(=O)C)CC2)c1Cl
624	CHEMBL2207660	test	3.0	3.1678571428571423	3.4	4.55098295211792	1.546579955753286	3.166355012682087	Cc1c(Cl)ccc(OC2CCN(C[C@H](O)CNC(=O)c3c[nH]nc3C(F)(F)F)CC2)c1Cl
625	CHEMBL2158783	test	3.0	3.01	3.2786944444444446	2.8125967979431152	1.9035458900453848	2.751209283108236	Cc1c(Cl)ccc(OC2CCN(CC3CCN(CC3)[C@@H](Cc4ccc(F)cc4)C(=O)O)CC2)c1Cl
626	CHEMBL1917427	train	3.0	3.43302962962963	3.5	3.3947293758392334	2.8253507629749683	3.288277442110958	Cc1c(F)ccc2c1c(Sc3ccc(Cl)cc3)c(C)n2CC(=O)O
627	CHEMBL1917456	train	3.0	3.083	3.8	4.543715000152588	1.3994869997947212	3.206550499986827	Cc1c(Oc2ccc(Cl)cc2)c3c(NS(=O)(=O)C)cccc3n1CC(=O)O
628	CHEMBL1917454	test	3.0	3.167307692307693	3.0	2.9152438640594482	3.2671788224779514	3.0874325947112733	Cc1c(Oc2ccc(Cl)cc2)c3cc(F)ccc3n1CC(=O)O
629	CHEMBL1917432	train	3.0	3.420785714285714	3.378947368421053	3.3396246433258057	3.593817153388752	3.4332937198553313	Cc1c(Sc2ccc(Cl)cc2)c3c(cccc3n1CC(=O)O)S(=O)(=O)C
630	CHEMBL1917431	train	3.0	3.120283823529412	3.306935483870968	3.1919312477111816	3.3964564948023828	3.253901762478486	Cc1c(Sc2ccc(Cl)cc2)c3cc(ccc3n1CC(=O)O)S(=O)(=O)C
631	CHEMBL1917419	train	3.0	3.0278814255919517	3.3	3.476900339126587	3.2907897143960674	3.2738928697786513	Cc1c(Sc2ccc(Cl)cc2)c3cc(Cl)ccc3n1CC(=O)O
632	CHEMBL1917426	train	3.0	3.0	3.1606382978723393	3.147029161453247	3.4451552513194725	3.188205677661265	Cc1c(Sc2ccc(Cl)cc2)c3cc(F)ccc3n1CC(=O)O
633	CHEMBL1917430	train	3.0	3.088179899976185	3.040298507462686	3.58880352973938	3.049038975855857	3.191580228258527	Cc1c(Sc2ccc(Cl)cc2)c3ccc(cc3n1CC(=O)O)S(=O)(=O)C
634	CHEMBL1526762	train	3.0	3.0433999999999997	3.033333333333333	1.622725009918213	16.07679939564993	5.9440644347253695	Cc1cc(C)nc(SCC(=O)N)n1
635	CHEMBL2207663	train	3.0	3.3144999999999993	3.0	3.3056747913360596	3.019984616624274	3.160039851990083	Cc1cc(Cl)ccc1OC2CCN(C[C@H](O)CNC(=O)C3=CNC(=O)C=C3C(F)(F)F)CC2
636	CHEMBL2207659	train	3.0	3.1168666666666667	3.0	1.6769932508468628	3.7055044434645503	2.87484109024452	Cc1cc(Cl)ccc1OC2CCN(C[C@H](O)CNC(=O)c3c[nH]nc3C(F)(F)F)CC2
637	CHEMBL2158780	train	3.0	3.005	4.0	3.2205984592437744	6.175961369153127	4.100389957099225	Cc1cc(Cl)ccc1OC2CCN(CC3CCN(CC3)[C@@H](Cc4ccc(F)cc4)C(=O)O)CC2
638	CHEMBL2158793	test	3.0	3.1359999999999997	3.309090909090909	2.914363145828247	1.3702613148886214	2.682428842451944	Cc1cc(F)ccc1OC2CCN(CC3CCN(CC3)[C@@](C)(Cc4ccc(F)cc4)C(=O)O)CC2
639	CHEMBL2158781	train	3.0	3.023	3.0043103448275863	4.820101261138916	2.985458733274919	3.4582175848103556	Cc1cc(F)ccc1OC2CCN(CC3CCN(CC3)[C@@H](Cc4ccc(F)cc4)C(=O)O)CC2
640	CHEMBL1852508	test	3.0	3.6956333333333338	3.9538461538461545	3.721247911453247	3.693056596146826	3.76594599869489	Cc1cc(nn1C[C@H](O)CN)c2ccc(Cl)c(c2)C(=O)NCC3(O)CCCCCC3
641	CHEMBL390674	test	3.0	3.251375	3.0589999999999997	4.866365909576416	2.8206295666208345	3.4993426190493127	Cc1cc(Oc2ccc3OCOc3c2)nc(Oc4ccc(cc4)n5ccnc5)n1
642	CHEMBL2158792	train	3.0	3.2709999999999995	3.0	2.4298477172851562	7.04476476161452	3.9364031197249187	Cc1cc(OC2CCN(CC3CCN(CC3)[C@@](C)(Cc4ccc(F)cc4)C(=O)O)CC2)ccc1Cl
643	CHEMBL2158782	train	3.0	3.8739999999999997	3.0	3.274738073348999	3.9411212617644305	3.522464833778357	Cc1cc(OC2CCN(CC3CCN(CC3)[C@@H](Cc4ccc(F)cc4)C(=O)O)CC2)ccc1Cl
644	CHEMBL1789327	train	3.0	3.805379477124183	3.1	3.042217254638672	3.241650199040156	3.297311732700753	Cc1ccc(C#N)c(S[C@H](CCN)c2ccccc2)n1
645	CHEMBL2171047	train	3.0	3.0610000000000004	3.032911392405063	2.7512266635894775	3.4369919248749246	3.0705324952173663	Cc1ccc(cc1)S(=O)(=O)NC(=O)N2CCC(CC2)N3CCC(CC3)Oc4ccc(Cl)c(C)c4Cl
646	CHEMBL2171046	train	3.0	3.005	3.0	3.0098984241485596	3.1791355655272504	3.0485084974189522	Cc1ccc(cc1)S(=O)(=O)NC(=O)N2CCC(CC2)N3CCC(CC3)Oc4ccc(Cl)cc4Cl
647	CHEMBL2171050	train	3.0	3.01	3.3	3.0147948265075684	3.4170193004437404	3.185453531737827	Cc1ccc(cc1)S(=O)(=O)NC(=O)N2CCC(CC2)N3CCC(CC3)Oc4ccc(F)c(F)c4
648	CHEMBL1777822	test	3.0	3.1441323529411767	3.23	3.240936517715454	2.856367751147575	3.1178591554510513	Cc1ccc(cc1c2cc(ccc2OCC(=O)O)C(F)(F)F)C#N
649	CHEMBL1782167	train	3.0	3.7295190476190476	3.0	3.3870058059692383	0.5041483335055326	2.655168296773455	Cc1ccc(cc1c2ccc(nc2)C(=O)NCC3CC3)C(=O)NC4CC4
650	CHEMBL1290746	train	3.0	3.835985526315789	3.4	3.7446486949920654	4.101968938179196	3.7706507898717625	Cc1ccc(cc1NC(=O)c2cnn(c2N)c3ccccc3F)C(=O)Nc4ccon4
651	CHEMBL1917445	test	3.0	3.2432608695652174	3.090909090909091	2.93233323097229	3.4925668265767893	3.189767504505847	Cc1ccc2c(c1)c([S+]([O-])c3ccc(Cl)cc3)c(C)n2CC(=O)O
652	CHEMBL211677	train	3.0	3.3500128205128203	3.961428571428571	3.330537796020508	3.1524830558535935	3.4486155609538733	Cc1ccc2c(c1)c(c(C)n2CC(=O)O)c3cc(C)nc4ccccc34
653	CHEMBL213495	train	3.0	3.544600000000001	3.6177777777777775	3.298323392868042	3.532280810723946	3.4982454953424416	Cc1ccc2c(c1)c(c(C)n2CC(=O)O)c3ccnc4c(cccc34)C#N
654	CHEMBL213494	train	3.0	3.3618071428571437	4.0	3.3575832843780518	3.663150269208022	3.5956351741108046	Cc1ccc2c(c1)c(c(C)n2CC(=O)O)c3ccnc4c(cccc34)S(=O)(=O)C
655	CHEMBL213854	train	3.0	3.234283333333334	4.0	3.4927899837493896	3.20036282983394	3.481859036729166	Cc1ccc2c(c1)c(c(C)n2CC(=O)O)c3ccnc4c(F)cccc34
656	CHEMBL214304	train	3.0	3.4621666666666666	3.6	3.5083465576171875	3.5016867955972018	3.518050004970264	Cc1ccc2c(c1)c(c(C)n2CC(=O)O)c3ccnc4cc(ccc34)C(F)(F)F
657	CHEMBL1917443	train	3.0	3.4495338235294115	3.3	3.495190143585205	3.0967988481501907	3.3353807038162016	Cc1ccc2c(c1)c(Sc3ccc(cc3)S(=O)(=O)C)c(C)n2CC(=O)O
658	CHEMBL1420171	train	3.0	3.113214758925285	3.1730158730158733	2.684382438659668	4.0642014128563195	3.2587036208642868	Cc1ccc2c(c1)c(Sc3ccccc3)c(CC(=O)O)n2C
659	CHEMBL1917442	train	3.0	3.1929833333333333	3.2044303797468343	2.949871778488159	4.041823282436408	3.347277193501184	Cc1ccc2c(c1)c(Sc3ccccc3Cl)c(C)n2CC(=O)O
660	CHEMBL2158772	test	3.0	3.77	3.309090909090909	3.361365795135498	3.275999463310082	3.429114041884122	Cc1ccccc1C[C@H](N2CCC(CN3CCC(CC3)Oc4ccc(Cl)c(Cl)c4)CC2)C(=O)O
661	CHEMBL2171038	train	3.0	3.134	3.3	3.0029094219207764	3.8606861733580344	3.3243988988197026	Cc1ccccc1S(=O)(=O)NC(=O)N2CCC(CC2)N3CCC(CC3)Oc4ccc(Cl)c(Cl)c4
662	CHEMBL1689122	train	3.0	3.2084428571428565	3.0	3.277932643890381	2.832755970090451	3.079782867780922	CC1CN(CCN1Cc2cc(Cl)ccc2OCC(=O)O)S(=O)(=O)c3ccccc3
663	CHEMBL244184	train	3.0	3.726583779357897	3.5	3.4069464206695557	6.586248489310217	4.304944672334417	Cc1cnc(Oc2ccc(cc2)n3ccnc3)nc1Oc4ccc5OCOc5c4
664	CHEMBL53366	train	3.0	3.3846202585649645	3.8	6.2640838623046875	3.1206827261656755	4.142346711758831	Cc1nccn1CCC(C(=O)N)(c2ccccc2)c3ccccc3
665	CHEMBL1204759	train	3.0	3.4175666666666666	3.1095238095238096	3.84389328956604	3.45318385175969	3.4560419043790516	Cc1nn(c(NC(=O)NS(=O)(=O)c2ccc(Cl)cc2)c1C#N)c3ccccc3
666	CHEMBL453	train	3.0	3.2594499999999993	3.072972972972973	3.330862522125244	1.7209765011700249	2.8460654990670604	Cc1noc(NS(=O)(=O)c2ccc(N)cc2)c1C
667	CHEMBL2324355	train	3.0	3.636657142857144	3.0	3.974058151245117	3.278249924901992	3.4722413047510634	Cc1nocc1C(=O)Nc2ccc(c(N)n2)c3ccccc3OC(F)(F)F
668	CHEMBL594684	train	3.0	3.2514499999999997	3.25	4.378680229187012	3.4221490065799065	3.5755698089417294	Cc1onc(NS(=O)(=O)c2ccc(Cl)cc2)c1
669	CHEMBL2086402	train	3.0	3.7051999999999996	3.9	4.7443037033081055	2.0202023633347097	3.5924265166607037	CCC(=O)CN1C(=O)c2c(OC)c(C(=O)NC3CCN(CCO)CC3)n(C)c2c4ccccc14
670	CHEMBL1916266	train	3.0	3.3876338235294123	3.3428571428571425	3.6164004802703857	2.9414407459409313	3.3220830481494676	CCC(CC)NC(=O)c1cnn(c1NS(=O)(=O)c2ccc(C)cc2)c3ccccn3
671	CHEMBL1916260	train	3.0	3.451071428571429	3.0	7.889936923980713	2.5393964695371802	4.22010120552233	CCC(CC)NC(=O)c1cnn(c1NS(=O)(=O)C2CCCC2)c3ccccc3
672	CHEMBL1789148	test	3.0	3.0821000000000005	3.2	1.9910749197006226	5.4518688133177395	3.4312609332545905	CCC(CCNC)Oc1cc(Cl)ccc1C#N
673	CHEMBL2376325	train	3.0	4.019329545454546	3.197435897435897	3.747087240219116	2.0387666977449155	3.2506548452136186	CCC1(C)NC(=O)c2cc(ccc2NC1=O)S(=O)(=O)Nc3ccc(Cl)cc3
674	CHEMBL1778643	train	3.0	3.1785137254901965	4.0	7.233503341674805	7.367590511909892	5.444901894768723	CCc1ccc(OCC(=O)O)c(c1)c2ccc(cc2)S(=O)(=O)C
675	CHEMBL373351	train	3.0	3.500715384615384	3.0897959183673467	7.588320255279541	10.981759964365231	6.290147880656876	CCc1nc2c(N)nc3ccccc3c2n1CC(C)(C)O
676	CHEMBL413065	train	3.0	3.4200333333333326	3.5	3.359827756881714	1.3479028248177136	2.90694097875819	CCc1nc2c(N)nc3ccccc3c2n1CC(C)C
677	CHEMBL1083637	train	3.0	3.578368181818183	3.5391891891891887	1.882933259010315	3.6625735052807626	3.1657660338246125	CCc1nc2c(N)nc3ccccc3c2n1Cc4ccccc4
678	CHEMBL642	train	3.0	3.50299642857143	3.3	1.6846781969070435	0.03758241235098252	2.1313142594573637	CCCC(=O)Nc1ccc(OCC(O)CNC(C)C)c(c1)C(=O)C
679	CHEMBL1518	train	3.0	3.0833999999999997	3.02	5.655419826507568	10.602351144308084	5.590292742703913	CCCC1=CC(=O)NC(=S)N1
680	CHEMBL1194759	train	3.0	3.3588	4.700000000000001	8.220327377319336	16.683427893591247	8.240638817727646	CCCC1CCCCC(=N1)N
681	CHEMBL1017	test	3.0	3.6039999999999996	3.3754761904761836	3.527665376663208	5.239042008695444	3.936545893958709	CCCc1nc2c(C)cc(cc2n1Cc3ccc(cc3)c4ccccc4C(=O)O)c5nc6ccccc6n5C
682	CHEMBL1082983	train	3.0	3.307182051282051	3.0	7.11483097076416	3.8723179937905985	4.323582753959203	CCCCc1nc2c(N)nc3ccccc3c2n1CC(C)(C)O
683	CHEMBL192307	train	3.0	3.2973375000000003	3.0588235294117645	4.676490783691406	4.308698225781587	3.8353375097211897	CCCCc1nc2c(N)nc3ccccc3c2n1CC(C)C
684	CHEMBL1082376	train	3.0	3.6216285714285728	3.4380952380952383	11.784746170043945	19.93361553127929	9.694521377711762	CCCCCCc1nc2c(N)nc3ccccc3c2n1Cc4ccccc4
685	CHEMBL589973	train	3.0	3.775	3.7	3.9975738525390625	6.5594634223023895	4.5080093187103625	CCCCNC(=O)c1ccc(Oc2ccc(CC(=O)O)cc2OC)c(NS(=O)(=O)c3ccc(Cl)cc3Cl)c1
686	CHEMBL1089518	train	3.0	3.404027097998619	4.0	3.721559524536133	3.7068987619439833	3.7081213461196834	CCCCOc1nc(N)c2NC(=O)N(Cc3cccc(CC(=O)O)c3)c2n1
687	CHEMBL398295	train	3.0	3.575227272727272	4.0	2.351762056350708	2.365412303364435	3.0731004081106037	CCCSc1nc(N[C@@H]2C[C@H]2c3ccccc3)c4nnn([C@@H]5C[C@H](O)[C@@H](O)[C@H]5O)c4n1
688	CHEMBL274713	train	3.0	3.323	3.1	3.4640748500823975	8.57051508166293	4.614397482936331	CCCSc1nc(N[C@@H]2C[C@H]2c3ccccc3)c4nnn([C@@H]5C[C@H](OCCO)[C@@H](O)[C@H]5O)c4n1
689	CHEMBL212731	train	3.0	3.1532999999999998	3.2073333333333336	4.748677730560303	4.699907383223468	3.952304611779276	CCN(C1CCN(CC[C@H](c2ccc(cc2)S(=O)(=O)C)c3cccc(F)c3)CC1)C(=O)Cc4ccc(cc4)S(=O)(=O)C
690	CHEMBL198758	train	3.0	3.3279999999999994	3.5	3.1417226791381836	11.979484627517076	5.487301826663815	CCN(C1CCN(CCC(c2ccccc2)c3ccc(cc3)C#N)CC1)C(=O)Cc4ccc(cc4)S(=O)(=O)C
691	CHEMBL370552	train	3.0	3.2119999999999997	4.0	18.13408660888672	42.66085830887159	17.001736229439576	CCN(C1CCN(CCC(c2ccccc2)c3ccc(NC(=O)C(C)(C)C)cc3)CC1)C(=O)Cc4ccc(cc4)S(=O)(=O)C
692	CHEMBL198497	test	3.0	3.141	3.0392156862745097	2.0140204429626465	-5.966210051261572	0.557006519493896	CCN(C1CCN(CCC(c2ccccc2)c3ccc(NC(=O)C)cc3)CC1)C(=O)Cc4ccc(cc4)S(=O)(=O)C
693	CHEMBL198114	train	3.0	3.066	3.0	5.375172138214111	-5.797063911586811	1.4110270566568248	CCN(C1CCN(CCC(c2ccccc2)c3ccc(NS(=O)(=O)C)cc3)CC1)C(=O)Cc4ccc(cc4)S(=O)(=O)C
694	CHEMBL182380	train	3.0	3.5667	4.0	-2.1832423210144043	2.3653575907892144	1.9372038174437025	CCN(C1CCN(CCC(c2ccccc2)c3ccccc3)CC1)C(=O)NCc4ccc(cc4)S(=O)(=O)C
695	CHEMBL1951896	test	3.0	3.0669999999999997	3.1	2.7946512699127197	7.714748016371585	4.169099821571076	CCN(C1CCN(CCC(N2CCN(CC2)S(=O)(=O)C)c3ccccc3)CC1)C(=O)Cc4ccc(cc4)S(=O)(=O)C
696	CHEMBL4065115	train	3.0	3.7239333333333327	4.0	5.012475490570068	11.858879968200636	6.148822198026009	CCN=S1(=O)NC(=O)c2ccccc12
697	CHEMBL4064952	test	3.0	3.609	3.1492187500000033	28.470544815063477	-3.8502419923693485	7.844630393173533	CCN1C(=O)c2ccccc2S1(=N)=O
698	CHEMBL3605530	train	3.0	3.7095938375350146	3.3	2.310433864593506	3.290390146418374	3.1526044621367237	CCn1c(nc2ccc(cc12)C(F)(F)F)[C@@H](C)NS(=O)(=O)C3CC3
699	CHEMBL3605541	test	3.0	3.567684126984127	3.862337662337662	2.5100247859954834	14.938336864670811	6.219595859997021	CCn1c(nc2ccc(cc12)C(F)(F)F)[C@@H](C)NS(=O)(=O)c3ccccn3
700	CHEMBL1208	train	3.0	3.742400000000001	4.0	3.422635316848755	3.3029695135511554	3.6170012075999773	CCN1N=C(C(=O)O)C(=O)c2cc3OCOc3cc12
701	CHEMBL4089277	train	3.0	3.4520333333333326	4.0	4.492916107177734	-3.56147321753332	2.0958690557444366	CCNC1=NS(=O)(=O)c2ccccc12
702	CHEMBL437526	train	3.0	3.5270000000000006	4.0	6.013241291046143	7.5244217697753335	5.266165765205369	CCO[C@@H]1OC(=O)C[C@@H]1NC(=O)[C@@H]2CCCN3N2C(=O)[C@H](CCC3=O)NC(=O)c4nccc5ccccc45
703	CHEMBL1399574	train	3.0	3.7637476190476207	3.1	3.01399564743042	-0.9838737434315401	2.223467380761625	CCOc1ccc(NC(=O)CCc2c(C)nc3nc(C)nn3c2C)cc1
704	CHEMBL1770482	train	3.0	3.5929157894736834	3.919782608695652	3.876105546951294	2.9426195659303533	3.582855877762746	CCOc1ccc2oc(C(=O)NC(CS(=O)(=O)C)c3nc4ccccc4[nH]3)c(C)c2c1
705	CHEMBL1016	train	3.0	3.579492344497608	3.243661971830985	3.077207565307617	3.7509899793452557	3.4128379652453664	CCOc1nc2cccc(C(=O)O)c2n1Cc3ccc(cc3)c4ccccc4c5nnn[nH]5
706	CHEMBL383322	test	3.0	3.029149104859335	3.0392156862745097	3.331355094909668	2.749381105901912	3.0372752479863565	CCOCc1nc2c(N)nc3ccccc3c2n1CC(C)(C)O
707	CHEMBL1778649	train	3.0	3.0019772727272724	3.0	2.704827070236206	3.11030072323253	2.954276266549002	CCS(=O)(=O)c1ccc(c(C)c1)c2cc(ccc2O[C@@H](C)C(=O)O)C(F)(F)F
708	CHEMBL1778648	train	3.0	3.0009285714285716	3.4	3.1086654663085938	3.2291235180172424	3.1846793889386023	CCS(=O)(=O)c1ccc(c(C)c1)c2cc(ccc2O[C@H](C)C(=O)O)C(F)(F)F
709	CHEMBL1778653	train	3.0	3.109477272727273	3.0	3.222675085067749	2.970575386190683	3.075681935996426	CCS(=O)(=O)c1ccc(c(C)c1)c2cc(ccc2OCC(=O)N)C(F)(F)F
710	CHEMBL1778639	train	3.0	3.0043616787439613	3.4	3.204697847366333	3.2956949611464097	3.2261886218141758	CCS(=O)(=O)c1ccc(c(C)c1)c2cc(ccc2OCC(=O)O)C(F)(F)F
711	CHEMBL1778645	train	3.0	3.0130588235294122	3.649107142857143	3.1811938285827637	3.416574277795885	3.3149835181913008	CCS(=O)(=O)c1ccc(c(C)c1)c2cc(Cl)ccc2OCC(=O)O
712	CHEMBL1778655	train	3.0	3.1259285714285716	3.4	3.1086654663085938	3.2291235180172424	3.2159293889386023	CCS(=O)(=O)c1ccc(c(Cl)c1)c2cc(ccc2O[C@H](C)C(=O)O)C(F)(F)F
713	CHEMBL1778638	train	3.0	3.07	3.1	3.1800107955932617	3.5647174235873766	3.2286820547951596	CCS(=O)(=O)c1ccc(c(Cl)c1)c2cc(ccc2OCC(=O)O)C(F)(F)F
714	CHEMBL1778644	train	3.0	3.030330588235294	3.9	3.335266351699829	3.0121759373949857	3.319443219332527	CCS(=O)(=O)c1ccc(c(F)c1)c2cc(Cl)ccc2OCC(=O)O
715	CHEMBL1761322	test	3.0	4.0809999999999995	3.1953488372093046	3.0991997718811035	4.650449892477001	3.7564996253918523	CCS(=O)(=O)CCCC12CCC(CC1)(CC2)c3nnc(c4ccccc4C(F)(F)F)n3C
716	CHEMBL1917459	train	3.0	3.349741071428572	3.4	5.7894182205200195	3.5419099888941155	4.020267320210676	CCS(=O)(=O)Nc1cccc2c1c(Oc3ccc(Cl)cc3)c(C)n2CC(=O)O
717	CHEMBL3912651	train	3.0	3.5172	4.0	3.249337911605835	3.2283145269969418	3.498713109650694	Cl.C[C@]1(COCCCCOC[C@H](NC(=O)[C@@H]2CCCN2C(=O)CNC1=O)C(=O)O)NCCc3ccccc3
718	CHEMBL3799561	train	3.0	3.633795555555555	4.0	3.278834819793701	3.2834633400452717	3.5490234288486318	Cl.NC(=O)C1=CC(=CN(Cc2cccc(Cl)c2)C1=N)Cl
719	CHEMBL1779503	train	3.0	3.547988453159042	3.4	3.193711280822754	2.723157403729057	3.2162142844277133	Clc1ccc(cc1C(=O)NCCc2ccccc2)N3N=CC(=O)NC3=O
720	CHEMBL2107729	train	3.0	3.7062916666666657	3.028571428571429	3.9609792232513428	3.974483754154067	3.6675815181608757	Clc1ccc(NS(=O)(=O)c2ccc(Cl)s2)c(c1)C(=O)Nc3ccc(cc3)S(=O)(=O)N4CCOCC4
721	CHEMBL2171025	train	3.0	3.5130000000000017	3.8833333333333333	3.704073905944824	2.7598751779433397	3.4650706043053745	Clc1ccc(OC2CCN(CC2)C3CCN(CC3)C(=O)c4ccc(cc4)C5=NOC(=O)N5)cc1Cl
722	CHEMBL2171044	train	3.0	3.049	3.0	3.2128005027770996	3.6147227261734014	3.219130807237625	Clc1ccc(OC2CCN(CC2)C3CCN(CC3)C(=O)NS(=O)(=O)c4cccc(c4)C#N)cc1Cl
723	CHEMBL2171033	train	3.0	3.0869999999999993	3.0	3.674002170562744	7.168317903553747	4.232330018529122	Clc1ccc(OC2CCN(CC2)C3CCN(CC3)C(=O)NS(=O)(=O)c4ccccc4)cc1Cl
724	CHEMBL2171039	train	3.0	3.1510000000000002	3.3	3.0029094219207764	3.8606861733580344	3.328648898819703	Clc1ccc(OC2CCN(CC2)C3CCN(CC3)C(=O)NS(=O)(=O)c4ccccc4Cl)cc1Cl
725	CHEMBL2171215	train	3.0	3.109	3.4	4.994395732879639	1.3760877024616263	3.2198708588353164	Clc1ccc(OC2CCN(CC2)C3CCN(CC3)C(=O)NS(=O)(=O)Cc4ccccc4)cc1Cl
726	CHEMBL1519272	train	3.0	3.6314045977011493	3.0	10.270026206970215	0.49819925851600105	4.349907515796841	Clc1ccccc1S(=O)(=O)NC(=O)c2ccc[nH]2
727	CHEMBL2010849	train	3.0	3.352	3.9	3.667200803756714	3.3372850477992135	3.5641214628889815	CN([C@@H]1CCN(Cc2ccc(nc2)C(F)(F)F)C[C@@H]1F)C(=O)Cc3ccc(cc3)n4cnnn4
728	CHEMBL3590124	train	3.0	3.6246006493506497	3.0	3.5604796409606934	4.123023363324517	3.5770259134089653	CN(C)[C@@H]1CC[C@H](CC1)Nc2ncc(Cl)c(Nc3ccccc3NC(=O)C=C)n2
729	CHEMBL1924034	train	3.0	3.6422375000000016	3.973809523809524	3.574704170227051	12.54620038454549	5.934237894645516	CN(C)C(C)(C(=O)OC1CC[N+](C)(C)CC1)c2ccccc2
730	CHEMBL1409708	train	3.0	3.6829499999999995	3.1	2.55782413482666	0.16042915246697007	2.3753008218234073	CN(C)c1ccnc2sc(C(=O)N)c(N)c12
731	CHEMBL551813	test	3.0	3.6843	3.5	3.480452060699463	4.93030231062413	3.8987635928308984	CN(C)c1nc(Cc2ccc(NC(=O)c3ccc(cc3)C(F)(F)F)cc2)nc(N(C)C)c1CC(=O)O
732	CHEMBL505	train	3.0	3.3500999999999994	4.0	0.9216538667678833	-0.8627906153871615	1.8522408128451804	CN(C)CCC(c1ccc(Cl)cc1)c2ccccn2
733	CHEMBL1778633	test	3.0	3.373	3.3750000000000004	3.347430944442749	3.1633632242781777	3.314698542180232	CN(c1ccc(c(C)c1)c2cc(ccc2OCC(=O)O)C(F)(F)F)S(=O)(=O)C
734	CHEMBL2010831	train	3.0	3.5378555555555544	3.197435897435897	3.6388351917266846	3.0709795364434336	3.361276545290392	CN(C1CCN(Cc2ccc(cc2)C(F)(F)F)CC1)C(=O)Cc3ccc(cc3)S(=O)(=O)C
735	CHEMBL180334	train	3.0	3.8150714285714282	3.973809523809524	8.995083808898926	8.162140535694858	6.236526324243684	CN(C1CCN(CCC(c2ccccc2)c3ccccc3)CC1)C(=O)Cc4ccc(F)cc4
736	CHEMBL272282	train	3.0	3.5285898293863	3.630784313725491	2.918196439743042	3.6015071130289273	3.4197694239709397	CN1C(=N)N(CC(=O)c2ccc(Cl)cc2)c3ccccc13
737	CHEMBL370657	test	3.0	4.576999999999999	3.5	7.933424949645996	4.214598355995615	5.0562558264104025	Cn1c(nnc1C23CCC(CC2)(CC3)c4noc(n4)c5ccc(F)cc5)c6ccccc6C(F)(F)F
738	CHEMBL4079515	train	3.0	3.4624999999999995	3.0227272727272716	4.539255619049072	7.767595813073633	4.698019676212494	Cn1c2CCNC(=O)c2cc1c3ccnc(NC4CCOCC4)n3
739	CHEMBL3261921	test	3.0	3.8757920465155764	3.5	1.6607389450073242	6.847388484258317	3.970979868945304	CN1Cc2cc(ccc2C1=O)c3ccc(C[C@H](NC(=O)[C@@H]4CCCCN4)C#N)cc3
740	CHEMBL3261928	test	3.0	3.857897971962678	4.0	4.030817031860352	1.5159696149030175	3.351171154681512	CN1Cc2ccc(cc2C1=O)c3ccc(C[C@H](NC(=O)C4(N)CCOCC4)C#N)cc3
741	CHEMBL9967	train	3.0	3.707062820512821	4.0	2.279513359069824	-9.136488312512451	0.21252196676754842	CN1CCN(CC(=O)N2c3ccccc3C(=O)Nc4cccnc24)CC1
742	CHEMBL2031229	test	3.0	3.3227777777777767	3.196470588235296	3.4785614013671875	5.351563023832873	3.8373431978032837	CN1CCN(CC1)c2ccc3N=CN(C(=O)c3c2)c4cc(NC(=O)c5ccccc5F)ccc4C
743	CHEMBL2031237	train	3.0	3.010685137085137	4.0	3.161876916885376	1.9375379822923877	3.027525009065725	CN1CCN(CC1)c2ccc3N=CN(C(=O)c3c2)c4cc(NC(=O)c5cncs5)ccc4C
744	CHEMBL2031236	train	3.0	3.003797619047619	3.4	3.2589571475982666	1.7041706225368731	2.8417313472956898	CN1CCN(CC1)c2ccc3N=CN(C(=O)c3c2)c4cc(NC(=O)c5cscn5)ccc4C
745	CHEMBL2031235	train	3.0	3.1479642857142864	3.4	3.2589571475982666	1.5397777930684842	2.8366748065952594	CN1CCN(CC1)c2ccc3N=CN(C(=O)c3c2)c4cc(NC(=O)c5oncc5)ccc4C
746	CHEMBL4101902	train	3.0	3.21	3.5	2.578533887863159	1.8980871159169646	2.7966552509450313	Cn1nc(nc1C2(CC2)c3ccccc3)c4cnc(N)c(n4)c5ccc(C(=O)N)c(F)c5
747	CHEMBL4091680	train	3.0	3.507199999999999	3.9099999999999993	3.319793939590454	2.0847020716070594	3.205424002799378	Cn1nc(nc1C2(CC2)c3ccccc3)c4cnc(N)c(n4)c5ccc(cc5)C(=O)N
748	CHEMBL4091640	train	3.0	3.7697272727272737	3.5105769230769233	3.659977912902832	5.433906556018655	4.093547166181421	Cn1nc(nc1C2(CC2)c3ccccc3)c4cnc(N)c(n4)c5cn[nH]c5
749	CHEMBL1790041	train	3.0	3.4881250000000006	3.1882142857142854	7.547397613525391	6.259810450917938	5.120886837539404	CNC(=C[N+](=O)[O-])NCCSCc1oc(CN(C)C)cc1
750	CHEMBL1917435	test	3.0	3.4113366423304643	3.4	3.3967082500457764	3.2517770768928953	3.364955492317284	CNC(=O)c1cccc2c1c(Sc3ccc(Cl)cc3)c(C)n2CC(=O)O
751	CHEMBL1645494	train	3.0	3.4743642857142856	3.3516935483870998	2.9431188106536865	4.378684193634363	3.5369652095973585	CNC(=O)Cc1ccc2C(=O)C=C(Nc2c1)c3cccnc3
752	CHEMBL2059910	train	3.0	3.6820289473684213	3.1095238095238096	4.687422752380371	3.6469933747841354	3.781492221014184	CNC(=O)Nc1nc2ccc(cn2n1)c3cncc(c3)S(=O)(=O)NC(C)(C)C
753	CHEMBL1789224	train	3.0	3.4590805555555564	3.5105769230769233	3.5124671459198	3.1151645246670543	3.3993222873048334	CNCC[C@@H](Oc1cc(ccc1C#N)C(F)(F)F)c2ccccc2
754	CHEMBL295467	train	3.0	3.5106214285714294	4.0	8.045919418334961	12.51210630959305	7.017161789124859	CNCCC(Oc1ccccc1OC)c2ccccc2
755	CHEMBL445	train	3.0	3.574199999999999	3.1	3.311000347137451	-3.531495265276921	1.6134262704651323	CNCCC=C1c2ccccc2CCc3ccccc13
756	CHEMBL128	test	3.0	3.152288235294118	3.0	6.2953619956970215	4.276839832700961	4.181122515923025	CNS(=O)(=O)Cc1ccc2[nH]cc(CCN(C)C)c2c1
757	CHEMBL3263994	test	3.0	3.667640476190477	3.9764705882352938	3.2939813137054443	3.197230866274107	3.53383081110133	CNS(=O)(=O)Nc1cccc(CC2=C(C)c3ccc(OC(=O)N(C)C)nc3OC2=O)c1
758	CHEMBL1290284	train	3.0	3.2969	3.2625	4.7944536209106445	-1.990399786484123	2.3408634586066306	COc1cc(cc(OC)c1O)C(=O)OCCCCNC(=N)N
759	CHEMBL22	train	3.0	3.317727272727272	3.0227272727272716	3.2489726543426514	3.9290081301851427	3.379608832495584	COc1cc(Cc2cnc(N)nc2N)cc(OC)c1OC
760	CHEMBL2147475	train	3.0	3.3179999999999996	4.0	3.185929298400879	2.65760938048461	3.290384669721372	COc1cc(ccc1OC[C@H](OP(=O)(O)O)C2CC2)N3C=Nc4cc(sc4C3=O)c5ccc(Cl)cc5
761	CHEMBL506	train	3.0	3.4222555555555556	3.0005309734513275	3.9389302730560303	3.978685438553699	3.585100560154153	COc1cc(NC(C)CCCN)c2ncccc2c1
762	CHEMBL2171036	train	3.0	3.011	3.0	3.177515745162964	1.7088815226378158	2.7243493169501947	COc1ccc(cc1)S(=O)(=O)NC(=O)N2CCC(CC2)N3CCC(CC3)Oc4ccc(Cl)c(Cl)c4
763	CHEMBL1917444	train	3.0	3.355159848484849	3.4	3.4089062213897705	3.531059679058245	3.4237814372332163	COc1ccc(Sc2c(C)n(CC(=O)O)c3ccc(C)cc23)cc1
764	CHEMBL213029	test	3.0	3.7293294970161974	3.3139999999999996	3.4157521724700928	3.4967066513687897	3.48894708021377	COc1ccc2c(c1)c(CC(=O)O)c(C)n2c3ccnc4cc(Cl)ccc34
765	CHEMBL154	train	3.0	3.435345454545455	3.9349999999999996	3.2589733600616455	5.364465602968811	3.9984461043939774	COc1ccc2cc(ccc2c1)[C@H](C)C(=O)O
766	CHEMBL1917448	train	3.0	3.3975456140350877	3.2	3.2525806427001953	4.100560195098244	3.4876716129583816	COc1cccc(c1)S(=O)(=O)c2c(C)n(CC(=O)O)c3ccc(C)cc23
767	CHEMBL8232	test	3.0	3.2115972222222218	4.0	0.9722934365272522	6.7795888982785	3.7408698892569934	COc1cccc(Oc2cncnc2O)c1
768	CHEMBL2171040	test	3.0	3.052	3.1953488372093046	4.518428802490234	-1.4160621741096533	2.3374288663974716	COc1ccccc1S(=O)(=O)NC(=O)N2CCC(CC2)N3CCC(CC3)Oc4ccc(Cl)c(Cl)c4
769	CHEMBL1800528	train	3.0	3.5130999999999997	3.0	2.6386096477508545	2.219611596969531	2.842830311180096	COc1ccnc(CCc2nc3c(C)ccnc3[nH]2)c1
770	CHEMBL1738840	train	3.0	3.411073921568627	3.29978947368421	2.4679856300354004	4.1882735267569995	3.341780638011309	COc1ccnc(CCc2nc3cccnc3[nH]2)c1
771	CHEMBL114500	test	3.0	3.6576500000000003	3.0	4.103018283843994	3.183568729406916	3.4860592533127277	COc1ccnc(NC2CCN(CC2)C(=O)c3ccc(cc3)C#N)c1
772	CHEMBL112747	train	3.0	3.944788888888888	3.0588235294117645	3.8955819606781006	4.253731070750642	3.7882313624323487	COc1ccnc(NC2CCN(CC2)C(=O)c3ccccc3)c1
773	CHEMBL2011441	train	3.0	3.842947058823529	4.0	4.1743669509887695	2.9616905108305187	3.7447511301607044	COc1nc(Br)cnc1NS(=O)(=O)c2ccc(Cl)s2
774	CHEMBL4060050	train	3.0	3.6318202020202026	3.4	2.663010597229004	4.377018844008484	3.5179624108144227	COCCN1[C@@H](C)Cc2[nH]c(cc2C1=O)c3ccnc(Nc4ccnn4C)n3
775	CHEMBL4098608	test	3.0	4.435143162393168	3.5	3.277399778366089	3.4735442245537005	3.671521791328239	COCCN1[C@@H](C)Cn2cc(cc2C1=O)c3nc(Nc4ccnn4C)ncc3C
776	CHEMBL4090886	train	3.0	3.533095823529412	4.0	3.3454999923706055	2.0135236273640778	3.2230298608160237	COCCN1CCn2cc(cc2C1=O)c3nc(Nc4ccnn4C)ncc3C
777	CHEMBL452273	train	3.0	3.862238095238096	3.076923076923077	3.5307388305664062	2.7207015971641395	3.2976503999729294	COCCNCc1ccc(cc1)c2cc(C(=O)N)c(NC(=O)N)s2
778	CHEMBL210884	train	3.0	3.7455357936507956	3.0	1.843980073928833	3.2841562245948337	2.9684180230436157	COCCOc1nc(N)c2NC(=O)N(Cc3ccccc3)c2n1
779	CHEMBL1778637	train	3.0	3.2735511111111104	3.5	2.7658517360687256	3.361023213556666	3.225106515184126	CS(=O)(=O)c1ccc(c(Cl)c1)c2cc(ccc2OCC(=O)O)C(F)(F)F
780	CHEMBL1778621	train	3.0	3.1221666666666668	3.98	4.695914268493652	5.986409021598797	4.446122489189779	CS(=O)(=O)c1ccc(cc1)c2cc(ccc2OCC(=O)O)C(F)(F)F
781	CHEMBL2325503	test	3.0	3.629966666666667	3.1291666666666664	3.2624809741973877	8.820449912983781	4.710516055128625	CS(=O)(=O)c1ccc(nc1)c2nnc(\C=C\c3oc(nn3)c4ccc(cc4)C#N)n2c5ccccc5Cl
782	CHEMBL1778619	train	3.0	3.323837931034482	3.4	3.5496914386749268	5.1950342070129425	3.8671408941805874	CS(=O)(=O)c1ccc(OCC(=O)O)c(c1)c2ccccc2
783	CHEMBL2207670	train	3.0	3.276	3.0	3.1837234497070312	1.6277425983887197	2.7718665120239376	CS(=O)(=O)c1ccc2C(=CNC(=O)c2c1)C(=O)NC[C@@H](O)CN3CCC(CC3)Oc4ccc(C#N)c(Cl)c4
784	CHEMBL3261927	train	3.0	3.5898360902255644	3.7077272727272725	3.026350736618042	3.47630115452501	3.4500538135239722	CS(=O)(=O)c1cccc(c1)c2ccc(C[C@H](NC(=O)C3(N)CCOCC3)C#N)cc2
785	CHEMBL440405	train	3.0	3.0367789473684206	3.2044303797468343	3.3484838008880615	3.5762953531124317	3.291497120278937	CS(=O)(=O)NC(=O)CCCc1c([nH]c2ccc(cc12)C#N)c3ccc(F)cc3
786	CHEMBL652	train	3.0	3.682454545454545	3.4	3.6781210899353027	0.5066090577505815	2.8167961732851077	FC(F)(F)COc1ccc(OCC(F)(F)F)c(c1)C(=O)NCC2CCCCN2
787	CHEMBL2164552	test	3.0	4.023931304347829	3.095038759689923	4.620385646820068	2.59982120414352	3.584794228750335	Fc1cc(cc(c1)c2onc(n2)c3ccc(cn3)C#N)C#N
788	CHEMBL1092926	train	3.0	3.4629999999999996	3.0	2.252216339111328	6.989231189697368	3.926111882202174	Fc1cc(cc(F)c1CN2CCOCC2)c3cccc4ncc(nc34)c5cnn(c5)C6CCNCC6
789	CHEMBL3093583	train	3.0	3.4274285714285715	3.9	5.288075923919678	1.802966631614976	3.6046177817408065	Fc1cc(NC(=O)C2=CC=CN(C2=O)c3ccccc3)ccc1Oc4ccc5nc(NC(=O)C6CC6)cn5n4
790	CHEMBL119385	train	3.0	3.7885732864357875	3.95	3.6463236808776855	5.0097725547881895	4.0986673805254155	Fc1ccc(SC2=NN3C=NC(=O)C(=C3C=C2)c4c(Cl)cccc4Cl)c(F)c1
791	CHEMBL945	train	3.0	3.4429	3.02	2.4448447227478027	-0.7094633060844919	2.0495703541658274	NC(=N)NC(=O)c1nc(Cl)c(N)nc1N
792	CHEMBL578288	train	3.0	3.3312	3.100000000000001	6.7829484939575195	4.845324991248978	4.514868371301624	NC(=NC#N)c1sc(Nc2ccccc2)nc1N
793	CHEMBL257167	train	3.0	3.3004999999999995	3.3	3.0786287784576416	4.110941837831189	3.4475176540722074	NC(=O)Nc1sc(cc1C(=O)N)c2ccc(F)cc2
794	CHEMBL4069780	train	3.0	3.037	3.957142857142857	-1.7692139148712158	11.202835299784983	4.106941060514156	NC1=NS(=O)(=O)c2ccccc12
795	CHEMBL203567	train	3.0	3.0082773572411416	3.4	3.306276559829712	2.5323087941930686	3.0617156778159806	Nc1c(cnn1c2ccc(F)cc2)C(=O)c3cccc(OC[C@@H](O)CO)c3
796	CHEMBL205133	train	3.0	3.010225490196079	3.3545882352941176	3.4822921752929688	1.7811477935336826	2.907063423579212	Nc1c(cnn1c2ccc(F)cc2)C(=O)c3cccc(OC[C@H](O)CO)c3
797	CHEMBL700	train	3.0	3.149246143790849	3.1499999999999995	3.7031657695770264	5.30292187768681	3.8263334477636715	Nc1ccc(cc1)S(=O)(=O)Nc2ccccn2
798	CHEMBL1778620	test	3.0	3.0970882352941174	3.0	2.4451093673706055	3.7182492428137337	3.0651117113696142	Nc1ccc(OCC(=O)O)c(c1)c2ccccc2
799	CHEMBL2030560	train	3.0	3.4273153846153837	3.033333333333333	3.60554838180542	3.3090419048440074	3.3438097511495357	Nc1nc2ccc(cc2[nH]1)C(=O)c3ccccc3
800	CHEMBL305513	train	3.0	5.380290588235291	3.1528753993610077	5.2195329666137695	-6.771748673547575	1.7452375701656233	Nc1nc2ccccc2[nH]1
801	CHEMBL373067	test	3.0	3.2659999999999996	3.0	2.2022008895874023	6.701289396502738	3.7923725715225354	Nc1nc2nc(SCc3ccccc3)nc(O)c2s1
802	CHEMBL1529362	train	3.0	7.917099999999998	4.133333333333332	4.763428688049316	-1.1400635674775819	3.918449613476266	Nc1nnc(s1)c2ccccc2
803	CHEMBL1272232	test	3.0	3.397694234750757	3.0	3.1069343090057373	4.399134518516344	3.4759407655682093	Nc1oc2cc(Cl)cc(C(=O)N[C@@H]3CN4CCC3CC4)c2n1
804	CHEMBL1789186	train	3.0	3.4638865826330534	3.2625	3.256579875946045	1.5294801679766574	2.8781116566389393	NCC[C@@H](Oc1cc(Cl)c(F)cc1C#N)c2ccccc2
805	CHEMBL1789328	test	3.0	3.611584646464646	3.0	3.6925103664398193	4.6531444029263955	3.739309853957715	NCC[C@@H](Oc1ccc(Cl)cc1C#N)c2ccccc2
806	CHEMBL1789187	train	3.0	3.6200981060606057	3.0304347826086957	3.058929204940796	0.14793065427402602	2.464348186971031	NCC[C@@H](Oc1nc(ccc1C#N)C(F)(F)F)c2oncc2
807	CHEMBL1084863	train	3.0	3.486072222222223	3.007142857142857	3.278794527053833	-0.6733112760654837	2.274674582588357	NS(=O)(=O)c1ccc(Nc2nccc(n2)c3ccccc3)cc1
808	CHEMBL2207282	test	3.0	3.3876999999999997	3.421825396825396	2.1556191444396973	0.7773221003136606	2.4356166603946887	NS(=O)(=O)c1ccc2C(=CNC(=O)c2c1)C(=O)NC[C@@H](O)CN3CCC(CC3)Oc4ccc(Cl)c(Cl)c4
809	CHEMBL257830	train	3.0	3.0227	3.414285714285714	3.1483256816864014	3.5427226463632664	3.2820085105838457	NS(=O)(=O)NC(=O)CCCc1c([nH]c2ccc(cc12)C#N)c3ccc(F)cc3
810	CHEMBL4086555	test	3.0	3.0185000000000004	3.0	3.219801425933838	-9.470853248102953	-0.05813795554227896	NS1(=O)=NC(=O)c2ccccc12
811	CHEMBL1807872	train	3.0	3.6581999999999995	3.439833333333333	2.297590732574463	1.9572718586156834	2.83822398113087	O[C@@H](CNCCCOCCNCCc1cccc(Cl)c1)c2ccc(O)c3NC(=O)Sc23
812	CHEMBL1201753	train	3.0	3.801730400645107	4.0	3.7059810161590576	3.8073127077926094	3.8287560311491937	O[C@H](C[C@H](O)\C=C\c1c(nc2ccccc2c1c3ccc(F)cc3)C4CC4)CC(=O)O
813	CHEMBL2208434	train	3.0	3.053927969348659	3.0	1.9885532855987549	3.5341690311895437	2.8941625715342396	O[C@H](CNC(=O)C1=CC(=O)Nc2ccccc12)CN3CCC(CC3)Oc4ccc(Cl)c(Cl)c4
814	CHEMBL2208431	train	3.0	3.200892857142857	3.0068783068783067	3.6236588954925537	3.033477572161882	3.2162269079189	O[C@H](CNC(=O)C1=NNC(=O)c2ccccc12)CN3CCC(CC3)Oc4ccc(Cl)c(Cl)c4
815	CHEMBL2208430	train	3.0	3.2354095238095244	3.0	3.588223457336426	3.0931689348059126	3.229200478987966	O[C@H](CNC(=O)c1c[nH]c2ccccc12)CN3CCC(CC3)Oc4ccc(Cl)c(Cl)c4
816	CHEMBL2207658	train	3.0	3.2340595238095244	3.0068783068783067	3.847055196762085	4.43343117244691	3.630356049974206	O[C@H](CNC(=O)c1c[nH]nc1C(F)(F)F)CN2CCC(CC2)Oc3ccc(Cl)c(Cl)c3
817	CHEMBL2208429	test	3.0	3.022	3.3139999999999996	2.3585073947906494	2.856259131891744	2.887691631670598	O[C@H](CNC(=O)c1n[nH]c2ccccc12)CN3CCC(CC3)Oc4ccc(Cl)c(Cl)c4
818	CHEMBL2208432	train	3.0	3.3775977142857143	3.5	5.842017650604248	2.3820508167021845	3.775416545398037	O[C@H](CNC(=O)N1C(=O)Nc2ccccc12)CN3CCC(CC3)Oc4ccc(Cl)c(Cl)c4
819	CHEMBL3261922	train	3.0	3.7097397759103643	3.4	3.1541194915771484	0.6269980069392173	2.7227143186066827	O[C@H]1CCN[C@@H](C1)C(=O)N[C@@H](Cc2ccc(cc2)c3ccc(cc3)C#N)C#N
820	CHEMBL552512	train	3.0	3.610969859943977	4.0	1.914480447769165	14.064935279243937	5.897596396739269	O=C(CC1CCCCCC1)Nc2cccc3C(=O)N(C=Cc23)[C@H]4CCNC4
821	CHEMBL1975242	train	3.0	3.6957379310344822	3.1771794871794876	1.3663480281829834	-1.6949898792402713	1.6360688917891704	O=C(Nc1nc2C(=O)NC=Nc2s1)c3ccccc3
822	CHEMBL4073707	test	3.0	3.638	4.0	4.874710559844971	1.3845191073327447	3.474307416794429	O=C1N=S(=O)(Nc2ccccc2)c3ccccc13
823	CHEMBL4094313	train	3.0	4.215366666666665	3.595999999999999	5.837202072143555	8.133108204547002	5.445419235839305	O=C1N=S(=O)(NCc2ccccc2)c3ccccc13
824	CHEMBL1892766	train	3.0	3.3309	3.2625	4.584137439727783	2.546867314455163	3.4311011885457368	O=C1NC(=O)C(=CN1Cc2occc2)C#N
825	CHEMBL4080944	train	3.0	3.029420258564964	3.6177777777777775	0.8693448305130005	3.222088368065661	2.6846578087303508	O=C1NCCc2[nH]c(cc12)c3ccnc(NC4CCOCC4)n3
826	CHEMBL4072622	train	3.0	3.061029349889876	3.0	2.395293951034546	2.466884996770643	2.7308020744237664	O=C1NCCn2cc(cc12)c3ccnc(NC4CCOCC4)n3
827	CHEMBL310671	train	3.0	22.711333333333332	5.0	-1.9624810218811035	21.806118698430787	11.888742752470755	O=C1NS(=O)(=O)c2ccccc12
828	CHEMBL1565910	test	3.0	3.6077000000000004	3.0	1.864781379699707	0.5239219160566229	2.2491008239390826	O=S1(=O)N=C(NCc2ccccc2)c3ccccc13
829	CHEMBL2158836	train	3.0	3.0	3.0	3.184406042098999	2.316532275291469	2.875234579347617	OC(=O)[C@@H](Cc1ccccc1)N2CCC(CN3CCC(CC3)Oc4ccc(Cl)c(Cl)c4)CC2
830	CHEMBL2158771	train	3.0	3.3497000000000003	3.0	2.8193674087524414	4.75815591074206	3.4818058298736254	OC(=O)[C@H](Cc1ccc(cc1)C#N)N2CCC(CN3CCC(CC3)Oc4ccc(Cl)c(Cl)c4)CC2
831	CHEMBL2158838	test	3.0	3.75	3.1291666666666664	3.134310722351074	2.545378150794829	3.1397138849531423	OC(=O)[C@H](Cc1ccc(Cl)cc1)N2CCC(CN3CCC(CC3)Oc4ccc(Cl)c(Cl)c4)CC2
832	CHEMBL2158778	train	3.0	3.153	3.0068783068783067	2.81101655960083	3.490314399151907	3.115302316407761	OC(=O)[C@H](Cc1ccc(F)cc1)N2CCC(CN3CCC(CC3)Oc4ccc(Cl)cc4)CC2
833	CHEMBL2158779	train	3.0	3.1	3.012820512820512	4.912743091583252	2.985458733274919	3.502755584419671	OC(=O)[C@H](Cc1ccc(F)cc1)N2CCC(CN3CCC(CC3)Oc4ccc(Cl)cc4Cl)CC2
834	CHEMBL2158835	train	3.0	3.0	3.5434782608695654	3.065948963165283	2.9141695325333403	3.1308991891420472	OC(=O)[C@H](Cc1ccccc1)N2CCC(CN3CCC(CC3)Oc4ccc(Cl)c(Cl)c4)CC2
835	CHEMBL2364624	test	3.0	3.3170000000000006	3.5	-0.5071449279785156	14.829445183817095	5.284825063959644	OC(=O)C[C@@H]1CC[C@H](CC1)c2ccc(cc2)c3ccc(Nc4ccc(nc4)C(F)(F)F)cn3
836	CHEMBL44793	test	3.0	3.5554576949620427	3.5	3.6868810653686523	10.226219919284775	5.242139669903867	OC(=O)c1[nH]c2cc(Cl)cc(Cl)c2c1\C=C\C(=O)Nc3ccccc3
837	CHEMBL2158824	train	3.0	3.1470000000000002	3.3636363636363638	2.547358274459839	3.1168937307353652	3.043722092207892	OC(=O)c1ccc(cc1)N2CCC(CN3CCC(CC3)Oc4ccc(Cl)c(Cl)c4)CC2
838	CHEMBL2158833	test	3.0	3.0	3.2900000000000005	2.303621530532837	19.519254046870998	7.0282188943509585	OC(=O)c1ccc(CN2CCC(CN3CCC(CC3)Oc4ccc(Cl)c(Cl)c4)CC2)cc1
839	CHEMBL2171024	train	3.0	3.0860000000000003	3.5434782608695654	3.6004295349121094	2.5405979171717252	3.19262642823835	OC(=O)c1cccc(c1)C(=O)N2CCC(CC2)N3CCC(CC3)Oc4ccc(Cl)c(Cl)c4
840	CHEMBL2158832	train	3.0	3.1198	3.4	3.5140559673309326	3.6116739532542828	3.4113824801463037	OC(=O)c1cccc(CN2CCC(CN3CCC(CC3)Oc4ccc(Cl)c(Cl)c4)CC2)c1
841	CHEMBL2171023	train	3.0	3.2104138888888896	3.0	3.3217289447784424	2.9286628753176918	3.115201427246256	OC(=O)c1ccccc1C(=O)N2CCC(CC2)N3CCC(CC3)Oc4ccc(Cl)c(Cl)c4
842	CHEMBL564737	train	3.0	3.2942309523809525	3.0	3.3220479488372803	3.2942256963804986	3.227626149399683	OC(=O)c1ccccc1c2ccc(Cl)c(c2)C(=O)NCC3(O)CCCCCC3
843	CHEMBL2158831	train	3.0	3.0470000000000006	3.0	2.875375747680664	2.6266573084537264	2.8872582640335978	OC(=O)c1ccccc1CN2CCC(CN3CCC(CC3)Oc4ccc(Cl)c(Cl)c4)CC2
844	CHEMBL2158827	test	3.0	3.02	3.421825396825396	2.4703545570373535	3.3234897273886785	3.0589174203128575	OC(=O)Cc1ccc(cc1)N2CCC(CN3CCC(CC3)Oc4ccc(Cl)c(Cl)c4)CC2
845	CHEMBL2158826	train	3.0	3.113	3.1333333333333333	3.4129040241241455	-0.8511917566576119	2.2020114001999667	OC(=O)Cc1cccc(c1)N2CCC(CN3CCC(CC3)Oc4ccc(Cl)c(Cl)c4)CC2
846	CHEMBL2158825	test	3.0	3.04	3.23	0.8597272634506226	6.063563046062637	3.2983225773783147	OC(=O)Cc1ccccc1N2CCC(CN3CCC(CC3)Oc4ccc(Cl)c(Cl)c4)CC2
847	CHEMBL2058529	train	3.0	3.308506858076564	3.8	3.6163907051086426	5.157117417857478	3.970503745260671	OC(=O)CCc1ccc(OCc2cc(Cl)ccc2c3ccccc3)cc1
848	CHEMBL1773254	train	3.0	3.3819955555555565	3.0	4.493253707885742	4.039808071837747	3.7287643338197616	OC(=O)CCc1ccc(OCc2cccc(Br)c2)cc1
849	CHEMBL361812	test	3.0	3.6545725274725283	3.96	3.0990867614746094	2.7754080015661926	3.3722668226283328	OC(=O)CCn1c2CC[C@H](Cc2c3ccccc13)NS(=O)(=O)c4ccc(F)cc4
850	CHEMBL3188597	train	3.0	3.681696078431372	3.0217391304347827	4.06352424621582	4.577921708949794	3.836220291007942	OC(=O)CCNc1cc(nc(n1)c2ccccn2)N3CCc4ccccc4CC3
851	CHEMBL1778616	train	3.0	3.4192613445378144	3.2044303797468343	3.3330349922180176	3.702576426793139	3.4148257858239512	OC(=O)COc1ccc(Br)cc1c2ccccc2
852	CHEMBL1778628	test	3.0	3.2097756862745097	3.4	3.141019821166992	4.286190255118621	3.5092464406400308	OC(=O)COc1ccc(cc1c2cccc(c2)C#N)C(F)(F)F
853	CHEMBL1778612	train	3.0	3.1370272727272726	3.0591666666666666	3.5271387100219727	2.7269491277324853	3.1125704442870994	OC(=O)COc1ccc(cc1c2ccccc2)[N+](=O)[O-]
854	CHEMBL1778614	train	3.0	3.3887666666666667	3.4	3.56196665763855	5.1950342070129425	3.8864418828295397	OC(=O)COc1ccc(cc1c2ccccc2)C(F)(F)F
855	CHEMBL1778630	test	3.0	3.2340902319902325	3.6	3.429738998413086	12.834692794662105	5.774630506266356	OC(=O)COc1ccc(cc1c2ccccc2c3ccccc3)C(F)(F)F
856	CHEMBL1778636	train	3.0	3.2650613445378154	3.4478571428571425	3.475620746612549	2.3745207390767136	3.140764993271055	OC(=O)COc1ccc(Cl)cc1c2cccc(c2)C#N
857	CHEMBL1689116	train	3.0	3.5633703284950373	4.0	3.420379877090454	2.5580609212496865	3.3854527817087945	OC(=O)COc1ccc(Cl)cc1CN2CCC(CC2)S(=O)(=O)c3ccccc3
858	CHEMBL1689114	train	3.0	3.3040056022408972	3.0227272727272716	3.389113187789917	3.2456265639407484	3.2403681566747085	OC(=O)COc1ccc(Cl)cc1CN2CCCN(CC2)S(=O)(=O)c3ccccc3
859	CHEMBL2171022	train	3.0	3.205	3.072972972972973	4.785266876220703	0.9229539821003534	2.9965484578235073	OC(=O)COc1cccc(c1)C(=O)N2CCC(CC2)N3CCC(CC3)Oc4ccc(Cl)c(Cl)c4
860	CHEMBL1000	test	3.0	3.3407269005847944	3.055263157894737	3.506531000137329	3.7766482362324107	3.419792323712318	OC(=O)COCCN1CCN(CC1)C(c2ccccc2)c3ccc(Cl)cc3
861	CHEMBL2023265	test	3.0	3.4878514831573666	3.0312903225806447	2.823814630508423	3.44137073816406	3.1960817936026236	OC(=O)CSCC(=O)Nc1nc(cs1)c2ccc(F)cc2
862	CHEMBL62136	train	3.0	4.2094	4.50425925925926	4.393826007843018	8.550522981468035	5.414502062142578	OC(c1ccc(cc1)N(CC(F)(F)F)S(=O)(=O)c2ccccc2)(C(F)(F)F)C(F)(F)F
863	CHEMBL249584	train	3.0	3.362016666666666	3.0	4.9557204246521	5.799717539307351	4.279363657656529	OC[C@H]1C[C@H]([C@H](O)[C@@H]1O)n2nnc3c(N[C@@H]4C[C@H]4c5ccccc5)nc(SCCC(F)(F)F)nc23
864	CHEMBL560423	train	3.0	3.6811627450980398	3.0	3.9090137481689453	4.164199222965238	3.6885939290580554	OC1(CNC(=O)c2cc(ccc2Cl)N3N=CC(=O)NC3=O)CCCCCC1
865	CHEMBL512504	train	3.0	3.627734126984127	3.0	2.1356253623962402	3.5422804560629153	3.0764099863608205	OC1=C(C#N)C(=O)Nc2scc(c3ccc(cc3)c4ccccc4O)c12
866	CHEMBL239767	test	3.0	3.374164809081527	3.211666666666667	4.342255592346191	0.3791110232473059	2.826799522835423	Oc1cc(ccc1NC(=O)Nc2ccccc2Br)[N+](=O)[O-]
867	CHEMBL1614705	train	3.0	3.73028193277311	3.439833333333333	3.3244829177856445	2.8693137226217464	3.3409779766284586	OCC(=O)N1CCC(CC1)c2[nH]nc(c3ccc(Cl)cc3F)c2c4ccncn4
868	CHEMBL272842	train	3.0	3.1770000000000005	4.0	3.364595651626587	1.9335002200371525	3.118773967915935	OCc1ccc(OC2CCN(CC3CCN(CC3)[C@@H](Cc4ccccc4)C(=O)O)CC2)cc1Cl
869	CHEMBL560219	train	3.0	3.7917499999999995	3.0921568627450977	2.2626891136169434	0.463252031644744	2.402462002001696	OCCN1C=Cc2c(NC(=O)Cc3ccc(Cl)c(c3)C(F)(F)F)cccc2C1=O
870	CHEMBL361546	test	3.0	3.568739337474119	3.3750000000000004	3.1048483848571777	5.910912230359332	3.989874988172658	ON1C(=O)N(CC2COc3ccccc3O2)c4ccsc4C1=O
871	CHEMBL309339	train	3.0	3.1711	3.0	1.8811224699020386	-1.2575030833112677	1.6986798466476924	ONC(=O)c1ccccc1O
872	CHEMBL435936	train	3.0	3.5832433473389353	3.1000000000000005	4.025493621826172	3.664533667037229	3.593317659050584	COc1cc2CCN(C(=O)Nc3cccc(Cl)c3Cl)c2cc1N4C[C@@H](C)N(C)[C@@H](C)C4
873	CHEMBL417780	test	3.0	3.4526999999999997	3.3750000000000004	3.9890143871307373	4.554430173062254	3.842786140048248	COc1ncc(CC2=CN(CC(=O)N3CCN(CC3)c4ccc(Cl)cc4)C(=NC2=O)SCc5ccc(F)cc5)cn1
874	CHEMBL3415629	test	3.0	3.729862877930613	3.1953488372093046	3.0391407012939453	10.176260765007711	5.035153295360393	C[C@@]1(CCN(C1=O)c2ccc(Cl)cc2)Nc3ccc(cc3)C(=O)NO
875	CHEMBL3127508	train	3.0	3.879258913308913	3.0	3.7259650230407715	3.5422158997102473	3.5368599590149827	CC(C)(O)Cn1cc(cn1)S(=O)(=O)c2ccc(NC(=O)[C@@H]3C[C@H]3c4cccnc4)cc2
876	CHEMBL2349471	train	3.0	3.5036030303030294	3.3516935483870998	3.4048593044281006	2.630570375409942	3.222681564632043	CC1(C)Cc2ccc(cc2[C@@]3(COC(=N3)N)C1)c4cncnc4
877	CHEMBL4073390	train	3.0	3.6145749999999985	4.0	3.353163480758667	2.7758420609682104	3.435895135431719	Cc1onc(c1)[C@](C)(O)C#Cc2cc3c(cc2F)C4CC(C4)n5cc(nc35)C(=O)N
878	CHEMBL3805372	train	3.0	5.5878000000000005	4.0	3.483778476715088	-4.969855423817295	2.0254307632244486	CCC[C@H]1N(CCC[C@@]1(Oc2csc(c2)C(F)(F)F)C(=O)N3CCN(CC3)c4ccccc4OCCCC(=O)O)C(=O)c5cnccc5C(F)(F)F
879	CHEMBL213642	train	3.0	3.4521428571428565	3.5	3.267465591430664	4.904971183140191	3.781144907928428	CN(C)C1CCN(C1)c2ccc(cn2)C3=COc4cc(Oc5ccc(F)cc5)ccc4C3=O
880	CHEMBL2349468	train	3.0	3.529000000000001	3.4323333333333337	3.259676694869995	3.1174330708335405	3.3346107747592173	CN1C(=N[C@@]2(CC(C)(C)Cc3ccc(cc23)c4cccc(c4)C#N)C1=O)N
881	CHEMBL2349469	train	3.0	3.30875	4.0	3.1063668727874756	3.06568762780458	3.370201125148014	CN1C(=N[C@@]2(CC(C)(C)Cc3ccc(cc23)c4cccnc4F)C1=O)N
882	CHEMBL2178238	train	3.0	3.1938	3.0	3.3082594871520996	0.5223526752783575	2.506103040607614	CN1C[C@@H]([C@H](C1)c2ccc(\C=C\C(=O)Nc3ccccc3N)cc2)C(=O)Nc4ccc(Br)cc4
883	CHEMBL2393169	train	3.0	3.630851082251082	3.0	3.407362461090088	5.987161743130801	4.0063438216179925	F[C@@H]1CNCC[C@H]1NS(=O)(=O)c2ccc(NC(=O)NCc3cccnc3)cc2
884	CHEMBL2177580	train	3.0	3.6302999999999988	3.0	2.979917287826538	1.3337274424339305	2.735986182565117	Nc1ccccc1NC(=O)\C=C\c2ccc(cc2)[C@H]3CN(Cc4ccccc4)C[C@@H]3C(=O)Nc5ccc(Cl)cc5
885	CHEMBL2393189	train	3.0	3.4824515406162466	4.0	4.636560440063477	4.805330076712791	4.231085514348129	Nc1ncc(CNC(=O)Nc2ccc(cc2)S(=O)(=O)c3ccccc3)cn1
886	CHEMBL2393159	test	3.0	3.558087325206763	3.211666666666667	1.2650761604309082	1.2082507862128868	2.310770234629306	O=C(NCc1cccnc1)Nc2ccc(cc2)S(=O)(=O)N3C[C@@H]4C[C@H]3CO4
887	CHEMBL2393186	train	3.0	3.5700050468463256	3.4	1.2501773834228516	26.059552396668998	8.569933706734544	O=C(NCc1cccnn1)Nc2ccc(cc2)S(=O)(=O)c3ccccc3
888	CHEMBL2158820	train	3.0	3.000892857142857	3.251612903225806	3.1113924980163574	2.7823246646865	3.0365557307678803	OC(=O)[C@@H](N1CCC(CN2CCC(CC2)Oc3ccc(Cl)c(Cl)c3)CC1)c4ccccc4
889	CHEMBL2158821	test	3.0	3.0	3.3139999999999996	2.152225971221924	3.059915414496268	2.881535346429548	OC(=O)[C@H](N1CCC(CN2CCC(CC2)Oc3ccc(Cl)c(Cl)c3)CC1)c4ccccc4
890	CHEMBL2158819	train	3.0	3.0	3.0	3.0768799781799316	4.3193555924650635	3.349058892661249	OC(=O)C(N1CCC(CN2CCC(CC2)Oc3ccc(Cl)c(Cl)c3)CC1)c4ccccc4
891	CHEMBL2158816	train	3.0	3.116714285714286	3.1700000000000004	3.41047739982605	2.482548080993169	3.044934941633376	OC(=O)C(N1CCCC(CN2CCC(CC2)Oc3ccc(Cl)c(Cl)c3)C1)c4ccccc4
892	CHEMBL2158817	train	3.0	3.04	3.4323333333333337	3.255589485168457	1.0246596088115525	2.6881456068283356	OC(=O)C(N1CCO[C@@H](CN2CCC(CC2)Oc3ccc(Cl)c(Cl)c3)C1)c4ccccc4
893	CHEMBL2037498	train	3.0	3.8188000000000013	3.9	4.078084945678711	5.001805646083543	4.199672647940564	CC[C@@H](C)[C@H]1N([C@@H](C(=O)N(C)C)c2ccc(C)nc2)C(=O)[C@H](NC1=O)C3Cc4ccccc4C3
894	CHEMBL2037501	train	3.0	3.999905555555556	4.0	3.36600661277771	2.8953290262357267	3.565310298642248	CC[C@H](C)[C@H]1N([C@@H](C(=O)N2CCOCC2)c3ccc(C)nc3)C(=O)[C@H](NC1=O)C4Cc5ccccc5C4
895	CHEMBL429736	test	3.0	3.4206222222222227	3.5	2.721698760986328	1.3609807687719602	2.7508254379951276	CC[C@H](C)[C@H]1N([C@@H](C(=O)N2CCOCC2)c3coc(C)n3)C(=O)[C@H](NC1=O)C4Cc5ccccc5C4
896	CHEMBL2037503	train	3.0	3.1827787267080754	3.1000000000000005	3.618101119995117	9.081845461204567	4.74568132697694	CC[C@H](C)[C@H]1N([C@@H](C(=O)NC)c2cc(C)cnc2C)C(=O)[C@H](NC1=O)C3Cc4ccccc4C3
897	CHEMBL1241547	train	3.0	3.7864722222222236	3.912	3.680006742477417	3.818124205461441	3.7991507925402703	Cc1ccc2c(cccc2n1)N3CCN(CCc4cccc5c4OCc6nc(C)cn56)CC3
898	CHEMBL1801372	train	3.0	3.757026302521008	3.3	3.9661946296691895	3.7828250097505522	3.701511485485187	Cc1nc(c2ccc(F)cc2F)n(C)c1CC(=O)NCc3ccc(F)cc3Cl
899	CHEMBL2436565	train	3.0	3.6296999999999997	4.0	6.24073600769043	8.912364004511803	5.695700003050558	Fc1cccc(F)c1C(=O)N2CCC3(CC2)CCN(C3)C(=O)Nc4ccc(OCC(F)(F)F)cc4
900	CHEMBL235018	train	3.0	3.238	3.4323333333333337	2.9197325706481934	6.4275229462953	4.004397212569207	CC(C)C1(C)OC(=NC1=O)NC23CC4CC(CC(O)(C4)C2)C3
901	CHEMBL3827141	train	3.0	3.8832772727272764	3.1942769230769232	3.734905481338501	1.6769323004157926	3.1223479943896235	CCCCc1ccc(cc1)c2nc(C)c(s2)c3ccnc(NN)n3
902	CHEMBL377114	train	3.0	3.839880952380952	3.7	5.723133087158203	-1.4619564183282536	2.9502644053027254	Fc1ccc(cc1)C2CNC(=O)C23CCN(CC3)C4(CCCCC4)c5ccc(F)cc5
903	CHEMBL1917460	test	3.0	3.769568627450981	4.0	1.9668511152267456	8.861879366778282	4.649574777364002	Cc1c(Oc2ccc(Cl)cc2)c3c(cccc3n1CC(=O)O)c4ccccc4
904	CHEMBL1164651	test	3.0	3.8259999999999996	4.0	2.6172502040863037	-1.9618992115734113	2.120337748128223	CCN(C1CCN(CCC(c2ccccc2)c3ccccc3)CC1)C(=O)NCc4cc(F)cc(F)c4
905	CHEMBL1163186	train	3.0	3.4476999999999998	4.0	16.198989868164062	22.46378882431268	11.527619673119185	CCN(C1CCN(CCC(C2CCN(Cc3ccc4ccccc4n3)CC2)c5ccc(F)cc5)CC1)C(=O)NCc6ccc(cc6)S(=O)(=O)C
906	CHEMBL1861752	train	3.0	3.1842000000000006	4.0	8.595453262329102	5.068859610964878	5.212128218323495	COC\C(=N\O)\c1ccc(OC)cc1
907	CHEMBL1860484	train	3.0	3.3895000000000004	3.1	5.912275314331055	13.257377425935328	6.4147881850665955	O\N=C(/NC1CCCCC1)\c2cccnc2
908	CHEMBL1209444	train	3.0	3.498833333333333	4.0	4.486873149871826	1.9659748693145151	3.4879203381299186	OC(=O)c1cccc(c1)C(=O)N2C[C@H]3CN(CC[C@H](NC(=O)C4CCCC4)c5ccccc5)C[C@H]3C2
909	CHEMBL411315	test	3.0	4.6629611111111124	3.8530327868852448	3.614436149597168	0.39400191151550734	3.131107989777258	OC(=O)CN1C(=O)[C@@]2(CC(=O)N(Cc3cccc(Cl)c3)C2=O)c4cc(Cl)ccc14
910	CHEMBL409714	train	3.0	3.301309523809524	3.0	2.25614595413208	2.8253084529744728	2.8456909827290193	OC(=O)CN1C(=O)[C@@]2(CN(Cc3cc(Cl)ccc3F)C(=O)C2)c4cc(Cl)ccc14
911	CHEMBL260241	train	3.0	3.803991304347826	3.2999999999999994	3.559802770614624	2.3884382431555897	3.26305807952951	OC(=O)CN1C(=O)C2(CC(=O)N(Cc3ccc(F)c(F)c3)C2=O)c4cc(Cl)ccc14
912	prednisone	train	3.0	3.5382608695652173	3.4	3.6872966289520264	2.940952720897196	3.39162755485361	OCC(=O)[C@]1(O)[C@]2(C)C(CC1)C3C(C(=O)C2)[C@]4(C)C(=CC(=O)C=C4)CC3
913	CHEMBL203125	train	3.02	8.434199999999999	3.0	0.7153860330581665	0.43912448458826187	3.147177629411607	ON(CCCP(=O)(O)O)C=O
914	CHEMBL4087945	train	3.1	3.693185370250666	3.3	2.0170035362243652	4.343008278928012	3.338299296350761	Cc1cc(C2CCCN(C2)C(=O)c3ccc4ncccc4c3)n5ncnc5n1
915	CHEMBL1784340	train	3.1	3.5751063492063504	3.4	6.935191631317139	3.9780159742452286	4.472078488692179	Cc1onc(C)c1CCC2CCN(CC2)S(=O)(=O)CC3(CCOCC3)N(O)C=O
916	CHEMBL3261483	train	3.1	3.6334750000000002	4.0	1.2281949520111084	2.5139189301080513	2.84389722052979	Clc1cc2C(=O)N(CCn3ncc(c1)c23)[C@@H]4CN5CCC4CC5
917	CHEMBL3628113	train	3.1	3.6410635186433353	3.988888888888889	4.021810054779053	2.2353432191665323	3.4717764203694523	Cc1ccoc1C(=O)Nc2ccc(N3C(=O)c4cccc(F)c4C3=O)c(Cl)c2
918	CHEMBL3603868	train	3.1	3.912120965309202	4.0	4.151401042938232	2.504543075175319	3.6420162708556885	CC(C)N(C(C)C)C(=O)n1cnc(S[C@@H]2C[C@H]3CC[C@@H]2C3)n1
919	CHEMBL1632218	train	3.1	3.2037999999999993	3.0	2.763871431350708	-2.332629822400408	1.6587604022375748	Cc1ccc2c(cccc2n1)N3CCN(CCc4cccc(NC(=O)c5csc(C)n5)c4)CC3
920	CHEMBL1242257	train	3.1	3.5439999999999974	3.0	2.685349941253662	-1.5065157181652136	1.9307085557721113	Cc1ccc2c(cccc2n1)N3CCN(CCc4cccc5c4OCc6c(ncn56)C(=O)NC7CCCC7)CC3
921	theophylline	train	3.1	3.6237499999999985	4.0	6.9294233322143555	-2.7786483747828803	2.943631239357868	Cn1c(=O)c2c(ncn2)n(C)c1=O
922	methylene chloride	train	3.15	165.75020000000004	20.839999999999993	227.5426483154297	249.71693656328523	165.96244621967872	ClCCl
923	CHEMBL4074744	train	3.2	3.956000000000003	3.1095238095238096	3.772732734680176	2.6261783288096967	3.3661087182534213	Cc1cc([C@@H]2CN(CC(F)(F)C2)C(=O)c3ccc(F)c(Br)c3)n4ncnc4n1
924	CHEMBL3681244	train	3.2	3.282999999999999	3.4	4.207019805908203	1.8564707019383437	3.1866226269616367	Cc1nc2cc(ccc2[nH]1)n3ncc(C(=O)c4cc5ccc(cc5[nH]4)c6ccccc6)c3N
925	CHEMBL3127122	train	3.2	3.1415	3.2062500000000003	3.118635654449463	1.4398567311211061	2.7265605963926425	NC1=NC(=CC(=O)N1)c2cccc(OC(F)(F)F)c2
926	CHEMBL469374	test	3.2	3.5557444444444446	3.5	3.6119401454925537	2.4746100937396935	3.285573670919173	CN1C(=O)COc2c(CCN3CCN(CC3)c4cc(F)cc5nc(C)ccc45)cccc12
927	CHEMBL504290	train	3.23	8.616299999999999	4.0	5.610041618347168	3.6166551109323697	5.460749182319884	CC(=O)O[C@@]12CO[C@@H]1C[C@H](O)[C@]3(C)[C@@H]2[C@H](OC(=O)c4ccccc4)[C@]5(O)C[C@H](OC(=O)[C@H](O)[C@@H](NC(=O)OC(C)(C)C(F)F)c6ccccc6)C(=C([C@@H](O)C3=O)C5(C)C)C
928	CHEMBL1784343	train	3.3	3.3654545454545466	3.1	3.1548964977264404	3.9518655382290238	3.3930541453525027	Cc1onc(C)c1CCC2CCN(CC2)S(=O)(=O)CC3(CCC3)N(O)C=O
929	CHEMBL3746480	test	3.3	3.2605076923076926	3.4	2.5344767570495605	2.925249889816905	3.0300585847935397	OC(=O)C1(CCC1)Sc2ccnc3ccc(cc23)C(F)(F)F
930	CHEMBL2386633	test	3.3	4.29161035196688	3.4729545454545456	3.6062421798706055	3.5991006208889345	3.7424769245452416	C[C@@H](O)c1nc2cnc3[nH]ccc3c2n1[C@@H]4CC[C@H](CC4)C#N
931	CHEMBL2386629	train	3.3	3.6298631422924914	3.4	3.4917495250701904	3.026948867089083	3.387140383612941	C[C@@H](O)c1nc2cnc3[nH]ccc3c2n1[C@@H]4CC[C@H](CC4)NCC(F)(F)F
932	CHEMBL3623014	test	3.3	3.637672670807454	3.0	4.370037078857422	2.151386684831713	3.2897741086241474	CNC(=O)C1Cc2ccccc2N1C(=O)COc3ccc(Cl)c(F)c3
933	CHEMBL2436967	test	3.3	3.3146999999999998	3.0	3.5386452674865723	2.8221625958864953	3.1688769658432667	O=C1NC=Cc2c(NC3CCCC3C#N)ncnc12
934	CHEMBL447822	train	3.3	3.4568218739495795	4.0	3.9314751625061035	2.4885699032430453	3.469216734924682	Cc1cccc(C)c1CNc2cc(cn3c(C)c(C)nc23)c4ccccn4
935	CHEMBL3828222	train	3.3	3.782319614723084	3.0	3.5986435413360596	2.483957601819771	3.2162301894697287	CCCCc1ccc(cc1)c2nc(C)c(s2)c3ccnc(N)n3
936	CHEMBL93484	train	3.31	3.4655666666666662	3.100000000000001	1.0532524585723877	9.294141987009269	4.228240278062081	CC1N=C(N)N=C(N)N1c2ccc(Cl)cc2
937	CHEMBL3086112	train	3.4	3.457947731092437	3.29978947368421	3.4284157752990723	3.216950169299406	3.3507757873437813	CC1(C)CCC(CC1)NC(=O)c2cc3c(F)cc(F)cc3[nH]2
938	CHEMBL1784361	train	3.4	3.65986049019608	3.1000000000000005	2.9971065521240234	1.430791979071022	2.7969397553477817	Cc1ccncc1CCC2CCN(CC2)S(=O)(=O)CC3(CCOCC3)N(O)C=O
939	CHEMBL1093726	train	3.4	3.4756749999999994	3.8	3.3280293941497803	3.1652750986393015	3.4422448731972706	CCOC(=O)C1=C(Nc2cc(OC)ccc2C1=O)c3cccc(Cl)c3
940	CHEMBL3318947	train	3.4	3.837499999999999	3.378947368421053	3.546485662460327	3.1737606419911177	3.4841734182181243	Cl.CCOC[C@@H](CC(C)C)NC(=O)[C@@H]1CNC[C@@H]([C@@H]1O)C(=O)N(C2CC2)c3ccc(cn3)C(C)C
941	CHEMBL3318928	train	3.4	3.608185714285713	3.8	4.184618949890137	3.117373963948229	3.6775446570310195	Cl.CCOC[C@@H](CC(C)C)NC(=O)[C@@H]1CNC[C@@H](C1)C(=O)N(C2CC2)c3ccc(cn3)C(C)C
942	CHEMBL3601397	test	3.4	3.345	3.4729545454545456	2.979966402053833	3.566931765229955	3.3412131781845833	COc1cc2CC(=O)N([C@@H](c3ccc(Cl)cc3)c2cc1OC(C)C)c4ccc(cc4)N(C)C[C@@H]5CC[C@H](CC5)N6CCNC(=O)C6
943	CHEMBL3127114	train	3.4	3.4285231361231365	3.3999999999999995	13.163012504577637	3.993123802120949	5.996164860705431	NC1=NC(=C(Cl)C(=O)N1)c2ccc(OCC3CCOC3)c(c2)C#N
944	CHEMBL2382403	train	3.4	3.6770571428571426	3.9	3.743091583251953	2.919160371486153	3.5598272743988124	CC(SC1=NC(=C(C#N)C(=O)N1)c2ccc(Cl)c(F)c2)C(=O)Nc3ccc(cc3)S(=O)(=O)N
945	CHEMBL1081870	train	3.4	3.7312732467532475	4.0	-0.27627062797546387	5.530701654915875	3.2464260684234145	Cc1cccc(C)c1CNc2nccc3c2nc(C)n3C
946	CHEMBL1085672	test	3.4	3.54024	3.2288095238095242	3.190899610519409	5.975794236158756	3.9839358426219222	Clc1cccc(c1)N2CCN(CC3CCCCN3)C2=O
947	CHEMBL480219	train	3.4	3.307	4.0	2.8190760612487793	1.8260691723452687	2.988036308398512	C[C@@H]1CN(Cc2ccc(cc2)n3ccnc3C(=O)N4CCC(CC4)Nc5cccc(F)c5)C[C@H](C)N1
948	CHEMBL413059	train	3.4	10.392199999999997	3.0	3.4402382373809814	3.082321764110449	4.978690000372857	C[C@H](CCC(=O)N)[C@H]1CC[C@H]2[C@@H]3[C@@H](C[C@@H]4CC5(CC[C@]4(C)[C@H]3C[C@H](OC(=O)C)[C@]12C)OOC6(CCC(CC6)C(=O)N)OO5)OC(=O)C
949	CHEMBL2021582	train	3.4	3.9495	4.0	2.8578691482543945	12.768492392668538	5.893965385230733	CCOC[C@@]1([C@@H]2CCC[C@H]12)c3ccc(Cl)c(Cl)c3
950	CHEMBL3094122	train	3.4	3.7418000000000005	3.6936062573099435	2.773144006729126	2.6131906493153667	3.2054352283386094	CN1C(=O)C=Cc2cc(COc3ccc4CCN(CCc4c3)C5CCC5)ccc12
951	CHEMBL1770953	test	3.41	13.356400000000034	3.7666666666666666	4.620536804199219	-0.1912551285354987	5.3880870855826055	CC(=O)O[C@@]12CO[C@@H]1C[C@H](O)[C@]3(C)[C@@H]2[C@H](CC(=O)c4ccccc4)[C@]5(O)C[C@H](OC(=O)[C@H](O)[C@@H](NC(=O)OC(C)(C)C(F)F)c6ccc(F)cc6)C(=C([C@@H](O)C3=O)C5(C)C)C
952	CHEMBL4101072	train	3.5	3.719895851370852	4.0	7.263584136962891	1.6453403426200897	4.157205082738458	Cc1cccc(CN2CCn3cc(cc3C2=O)c4nc(Nc5ccnn5C)ncc4C)n1
953	CHEMBL1778652	test	3.5	3.018666666666667	3.4	3.58247709274292	3.1217295875112603	3.280718336730212	CCS(=O)(=O)c1ccc(c(C)c1)c2cc(ccc2CCC(=O)O)C(F)(F)F
954	CHEMBL253293	train	3.5	4.075388888888888	3.9	3.8902387619018555	3.5790370742379567	3.8611661812571754	FC(F)(F)c1cc(NC(=O)NC2CCN(CCC3CCS(=O)(=O)C3)CC2)cc(c1)C(F)(F)F
955	CHEMBL1778635	test	3.5	3.1681323529411767	3.23	3.240936517715454	2.8338700943512265	3.1182347412519644	OC(=O)COc1ccc(cc1c2cc(ccc2F)C#N)C(F)(F)F
956	CHEMBL2419515	train	3.5	3.708954545454546	3.5434782608695654	2.5854740142822266	6.004999884080789	3.960726676171782	Cc1ccc(cn1)S(=O)(=O)c2ccc(CNC(=O)N3Cc4ccncc4C3)cc2
957	CHEMBL2431051	test	3.5	4.222500000000003	4.0	6.8241729736328125	11.485703709120315	6.633094170688283	Cl.CCOc1ccccc1OCCNCCCCN2C(=O)C3CCCN3C2=O
958	CHEMBL469098	train	3.5	4.118999999999995	4.0	7.506227970123291	3.931571359703628	4.889199832456729	C[C@@H]1CN(Cc2ccc(cc2)c3cccnc3C(=O)N4CCC(CC4)Nc5cccc(c5)C#N)C[C@H](C)N1
959	CHEMBL471047	train	3.5	3.763215909090909	4.0	3.9671266078948975	1.5956766674754916	3.3315047961153246	C[C@H]1CN(CCN1CCc2cccc3N(C)C(=O)COc23)c4cccc5nc(C)ccc45
960	CHEMBL1631545	train	3.5	4.00245	3.862142857142857	3.1972908973693848	-4.787801196087709	1.568520639606133	Cc1ccc2c(cccc2n1)N3CCN(CCc4cccc(c4)n5cccn5)CC3
961	CHEMBL1594422	train	3.5	3.673988235294118	3.9176190476190476	3.649341583251953	3.2263148755374034	3.6168159354256306	CN(C)C(=O)c1ccc(cc1)n2nc(c3CCCCc23)C(F)(F)F
962	CHEMBL3288752	train	3.6	3.5087657894736837	3.9	3.248607873916626	3.239737129738587	3.474277698282224	CC1=CC2=NN(Cc3cc(ccc3Cl)[C@@H]4O[C@H](CO)[C@@H](O)[C@H](O)[C@H]4O)C(=O)N2C=C1Cl
963	CHEMBL3291337	train	3.6	3.5614000000000003	4.0	1.8053793907165527	-0.18957247602813845	2.294301728672104	CN1N(C(=O)C2=C1[C@]3(C)CC[C@H]2C3(C)C)c4ccccc4
964	CHEMBL3127132	train	3.6	3.2844909085419407	3.2810810810810813	3.2247350215911865	3.9627101850547657	3.4382542990672436	CNC1=NC(=C(C#N)C(=O)N1)c2ccc(OCC(C)C)c(c2)C#N
965	CHEMBL3261926	train	3.6	3.3034488811249134	3.5	9.327313423156738	2.239201940730371	4.592491061253006	NC1(CCOCC1)C(=O)N[C@@H](Cc2ccc(cc2)c3ccc(cc3)C#N)C#N
966	CHEMBL1689109	train	3.6	3.028295238095238	3.17375	3.3692123889923096	3.3090021527980844	3.220064944971408	OC(=O)COc1ccc(Cl)cc1CN2CCN(CC2)S(=O)(=O)c3ccccc3
967	CHEMBL2386630	train	3.6	3.6937114973262055	4.0	3.441293478012085	5.912524183248834	4.261882289646781	C[C@@H](O)c1nc2cnc3[nH]ccc3c2n1[C@@H]4CC[C@H](CC4)NCC(F)F
968	CHEMBL3781675	test	3.6	3.695	3.1953488372093046	3.6695151329040527	3.716739189764517	3.5691507899694686	Cc1cc(Cl)ccc1[C@H]2COC(=N2)N
969	CHEMBL2010880	train	3.6	3.7310654970760226	3.1499999999999995	3.4987425804138184	0.43058596771332824	2.7025985113007924	C(N1CCCCC1)c2cccc3[nH]c(nc23)c4ccccc4
970	CHEMBL231184	train	3.6	3.702965277777778	3.6177777777777775	3.4658114910125732	3.4844303047089618	3.5677462128192725	Cc1ccc(cc1C(=O)O)n2c(C)ccc2c3cc(Cl)ccc3OCc4ccc(F)cc4
971	CHEMBL1784359	train	3.7	3.9315	4.0	3.1208620071411133	0.826782145828005	2.9697860382422796	CS(=O)(=O)c1ccc(CCC2CCN(CC2)S(=O)(=O)CC3(CCOCC3)N(O)C=O)c(c1)C4CC4
972	CHEMBL1940311	train	3.7	3.871000000000001	4.0	24.820100784301758	22.23792374450235	13.732256132201027	O[C@]1(CN2CCC1CC2)C#Cc3ccc(Oc4ccc(cc4)C(=O)NC5CCN(CC5)C(=O)C6CC6)cc3
973	CHEMBL1784364	test	3.8	3.405083333333331	3.4	3.5440258979797363	1.4014617615143665	2.9376427482068586	Cc1cccnc1CCC2CCN(CC2)S(=O)(=O)CC3(CCOCC3)N(O)C=O
974	CHEMBL1643883	test	3.8	3.354862222222223	3.3754761904761836	6.595930576324463	-0.12659486313152626	3.299918531472836	Cn1nc2CN([C@H]3CN4CCC3CC4)C(=O)c5cccc1c25
975	CHEMBL2385096	train	3.8	3.7833588235294133	3.5105769230769233	3.5191709995269775	3.9848870429787393	3.6994984472780135	C[C@@H](O)c1nc2cnc3[nH]ccc3c2n1[C@H]4CC[C@H](C4)NCC(F)(F)F
976	CHEMBL2349470	test	3.8	3.2134000000000005	3.3139999999999996	3.3475210666656494	3.0565767747864467	3.232874460363024	CN1C(=N[C@@]2(CC(C)(C)Cc3ccc(cc23)c4cncnc4)C1=O)N
977	CHEMBL1289618	test	3.8	3.4701	3.5	3.115554094314575	4.095845184040352	3.545374819588732	CN1C(=O)C=Cc2c(CCN3CCN(CC3(C)C)c4cccc5nc(C)ccc45)cccc12
978	CHEMBL1171975	train	3.8	3.620557921318448	3.1	6.905594825744629	2.503045669057007	4.032299604030021	C(C1CNCCN1c2ccc3[nH]ncc3c2)c4ccccc4
979	CHEMBL1940296	train	3.9	3.66449761904762	3.0	1.9006922245025635	1.6955010758914826	2.565172729860416	CNC(=O)c1ccc(Oc2ccc(cc2)C#C[C@]3(O)CN4CCC3CC4)cc1
980	CHEMBL1934417	train	3.9	4.2174999999999985	3.7	5.233842849731445	7.888874075429127	5.260054231290143	COCCC(C)n1nc(C)c(C(=O)N[C@@H](C)C(C)(C)C)c1NS(=O)(=O)c2ccc(C)cc2
981	CHEMBL3318415	train	3.9	3.341497254901961	3.8	3.591060161590576	3.5978193093509834	3.58259418146088	OC1=C(Sc2ccccc2Cl)C(=O)CC(C1)c3ccccc3
982	CHEMBL1834688	train	3.9	3.5563052359405303	3.0	0.61236172914505	3.2292288190822434	2.599473946041956	Fc1cc(F)cc(NC(=O)CN(C2CCOC2)C(=O)c3ccc(cc3)c4ccccn4)c1
983	CHEMBL2013195	train	3.9	3.457525814536341	4.0	4.275404930114746	2.2914534175802905	3.5060960405578445	Oc1ccc2[nH]c(nc2c1CN3CCCCC3)c4ccccc4
984	fipronil	train	3.95	3.549	3.3516935483870998	3.382664442062378	3.4915923295473252	3.4437375799992007	N#CC1C(S(=O)C(F)(F)F)=C(N)N(N=1)C2=C(Cl)C=C(C(F)(F)F)C=C2Cl
985	CHEMBL2326864	train	3.98	3.307951984126985	3.1882142857142854	3.2951104640960693	3.5774678832836884	3.342186154305257	CC(=O)Nc1nc(CCc2ccc(NC(=N)N)cc2)cs1
986	CHEMBL1539037	train	3.98	3.8769809523809537	3.0217391304347827	3.1327595710754395	-0.034993723684391326	2.499121482551696	COc1ccc(NC(=O)CCc2c(C)nc3nc(C)nn3c2C)cc1
987	CHEMBL1504335	train	4.0	3.7387255555555567	3.4	4.554519176483154	4.561892704066318	4.063784359026258	C(N1CCN(Cc2oc(nn2)c3ccccc3)CC1)c4ccccc4
988	CHEMBL1257458	train	4.0	3.5830397435897434	3.55	3.258574962615967	2.790292966663	3.2954769182171773	C[C@@H](N1[C@@H]2CC[C@H]1C[C@@H](C2)Oc3cccc(c3)C(=O)N)c4ccc(C)nc4
989	CHEMBL2335905	train	4.0	3.7592999999999996	3.1000000000000005	3.5276219844818115	0.738451851569179	2.781343459012748	C[C@@H](NC1=CC(=O)NCC1)c2ccc(Nc3ncc4cc(ccc4n3)c5ccncc5)cc2
990	CHEMBL402986	train	4.0	3.6030438842203556	3.0	3.709583282470703	3.9341415049142703	3.5616921679013323	C[C@H](CO)Nc1nc(SCc2ccccc2)nc3NC(=O)Sc13
991	CHEMBL3736345	test	4.0	3.8392847730530355	3.5	3.57171630859375	2.5773365370238372	3.372084404667656	CC(C)(C)n1nnc2CC(CCc12)n3cnc(n3)c4ccc(F)cc4
992	CHEMBL2337977	train	4.0	3.6260499999999998	3.7752	3.5882060527801514	2.9993005194861824	3.497189143066583	CC(C)(C)NC(=O)NCCN1CC(C1)NC(=O)c2cc(Cl)cc(Cl)c2
993	CHEMBL375166	train	4.0	3.419475	3.306935483870968	3.41043758392334	3.5456183384877242	3.420616601570508	CC(C)CN1C(=O)N(C)C(=O)c2c1sc(Cc3c(C)n[nH]c3C)c2C(=O)N4C[C@H](O)CO4
994	CHEMBL2011115	train	4.0	3.7769750000000006	3.0	3.7949068546295166	3.7087405241112554	3.5701555946851933	CC(C)N1Cc2c(NCc3ccc(OC(F)(F)F)cc3)nc(nc2C1=O)N4CCN(CC4)C(=O)C
995	CHEMBL497031	train	4.0	3.979969696969698	3.5	3.745417594909668	3.41952588538429	3.6612282943159142	CC(C)N1CCC(CC1)Oc2ccc3c(c2)cc(C(=O)N4CCC(F)(F)CC4)n3C(C)C
996	CHEMBL1257964	train	4.0	3.6673008417508424	3.4	3.8170197010040283	-1.0108501765804223	2.468367591543612	CC(C)N1CCC(CC1)Oc2ccc3c(c2)cc4C(=O)NC[C@H](C)n34
997	CHEMBL3124968	train	4.0	3.9998329714403247	4.0	3.8578665256500244	6.861284098519978	4.679745898902582	CC(C)N1CCN(CC1)C(=O)[C@H]2CC23CCN(CC3)C4CCOCC4
998	CHEMBL3127698	train	4.0	4.0004	4.0	3.859647750854492	2.8609274807192344	3.680243807893431	CC(C)N1CCN(CC1)C(=O)C2CC23CCN(CC3)C4CCOCC4
999	CHEMBL3127679	train	4.0	3.8545666666666665	4.0	3.329439640045166	12.021760661104329	5.80144174195404	CC(C)N1CCN(CC1)C(=O)C2CC3(CCN(CC3)C4CCOCC4)C2
1000	CHEMBL1779195	train	4.0	4.023688095238091	3.1606382978723393	2.997594118118286	4.140288562110816	3.580552268334883	CC1(C)c2cc(OCCNC(=O)N)ccc2C(=O)c3c1[nH]c4cc(ccc34)C#N
1001	CHEMBL1917428	train	4.0	3.231375	3.0	3.2539596557617188	3.3055550252593497	3.197722420255267	Cc1c(Sc2ccc(Cl)cc2)c3c(C#N)c(Cl)ccc3n1CC(=O)O
1002	CHEMBL1020	train	4.0	3.3777239215686268	3.961428571428571	3.192922830581665	2.253977775499524	3.196513274769597	Cc1ccc(cc1)C(=O)c2ccc(CC(=O)O)n2C
1003	CHEMBL212777	train	4.0	3.2115000000000005	3.0588235294117645	3.2218260765075684	3.301698313850955	3.1984619799425724	Cc1ccc2c(c1)c(c(C)n2CC(=O)O)c3ccnc4cc(Cl)ccc34
1004	CHEMBL1743245	train	4.0	3.8604290616246506	3.8830487499999995	3.509472131729126	-0.11786898550896995	2.7837702394612016	Cc1ccccc1\N=N\c2ccc(NC(=O)c3ccnn3C)c(C)c2
1005	CHEMBL1081646	test	4.0	3.2018863777089788	3.0	3.198425054550171	2.7104491218732516	3.0276901385331003	CCCN(CCC)c1cc(ncn1)C(=O)Nc2ccc(O)cc2
1006	CHEMBL1939744	train	4.0	3.836385714285714	4.1	4.650418758392334	1.4408245201312293	3.506907248202319	CCN(C)C(=O)c1ccc(cc1)[C@@H](N2CCN(CCCOC)CC2)c3cccc(NC(=O)C4CC4)c3
1007	CHEMBL211866	test	4.0	3.0669999999999997	3.1	2.748884916305542	7.714748016371585	4.157658233169282	CCN(C1CCN(CC[C@@H](c2ccccc2)c3ccc(cc3)S(=O)(=O)C)CC1)C(=O)Cc4ccc(cc4)S(=O)(=O)C
1008	CHEMBL180184	test	4.0	3.7465999999999995	3.5	-4.553567409515381	1.8636878120885774	1.1391801006432989	CCN(C1CCN(CCC(c2ccccc2)c3ccccc3)CC1)C(=O)NCc4ccccc4
1009	CHEMBL5	train	4.0	3.7079999999999984	3.1	3.101332902908325	2.7462243346613007	3.163889309392406	CCN1C=C(C(=O)O)C(=O)c2ccc(C)nc12
1010	CHEMBL1783278	train	4.0	3.655131410256411	4.0	3.5051803588867188	2.415103078226126	3.393853711842314	CCN1Cc2nc3c(c(F)ccc3c(N)c2C1=O)c4cc(OC)ccc4OC
1011	CHEMBL1783274	train	4.0	3.4430103386809265	3.0357142857142856	3.5470335483551025	3.947389407653979	3.4932868951010736	CCNC(=O)c1nnc2c(c(F)ccc2c1N)c3cc(OC)ccc3OC
1012	CHEMBL350563	test	4.0	3.4202999999999997	3.2012500000000004	4.220969200134277	7.821588154584587	4.666026838679716	CCO\N=C(\C1CCN(CC1)C2(C)CCN(CC2)C(=O)c3c(Cl)cncc3Cl)/c4ccc(Br)cc4
1013	CHEMBL112246	train	4.0	3.230795555555556	3.0	3.3697495460510254	3.162108943378408	3.1906635112462474	CCOC(=O)N1CCC(CC1)Nc2cc(OC)ccn2
1014	CHEMBL1939750	train	4.0	3.6623190476190466	3.0	4.664610385894775	3.2236497352241913	3.637644792184503	CCOC(=O)Nc1cccc(c1)[C@H](N2CCN(Cc3c[nH]c(C)n3)CC2)c4ccc(cc4)C(=O)N(C)CC
1015	CHEMBL1778647	train	4.0	3.2310000000000003	3.378947368421053	3.365466594696045	2.9670876329787967	3.2356253990239736	CCS(=O)(=O)c1ccc(c2cc(Cl)ccc2OCC(=O)O)c(c1)C(F)(F)F
1016	CHEMBL3216799	train	4.0	3.6598999999999977	3.7	3.937358856201172	9.10693084284452	5.101047424761422	Cl.Cl.CN[C@@H](C)C(=O)N[C@@H](C1CCC(F)(F)CC1)C(=O)N2C[C@H]3C[C@@H](O)CN3C[C@H]2C(=O)N[C@@H]4CCOc5ccccc45
1017	CHEMBL3086072	train	4.0	3.566149999999999	3.0	4.789510726928711	3.3783804373436808	3.6835102910680977	Cl.CN(C)C(=O)Oc1cc2OC(=O)C(=C(C)c2cc1Cl)Cc3cccc(NS(=O)(=O)NCCN)c3
1018	CHEMBL2094588	train	4.0	3.452581818181818	3.4	6.125668525695801	23.250275335734038	9.057131419902914	Clc1ccc(cc1)C(=O)CN2C3=NCCN3c4ccccc24
1019	CHEMBL1290217	train	4.0	3.3834598136645955	3.0	8.047797203063965	3.399058095385115	4.457578778028418	Clc1ccc(N2CCN(CC2)C(=O)COCc3cnccn3)c(Cl)c1
1020	CHEMBL1289348	test	4.0	3.7339222222222226	3.9	5.852290153503418	3.3807230175397844	4.216733848316356	Clc1ccnc(c1)N2CCN(CC2)C(=O)COCc3ccncc3
1021	CHEMBL2010848	test	4.0	3.0	3.3754761904761836	3.330118417739868	3.050190930014877	3.188946384557732	CN([C@@H]1CCN(Cc2ccc(cn2)C(F)(F)F)C[C@@H]1F)C(=O)Cc3ccc(cc3)n4cnnn4
1022	CHEMBL1223872	train	4.0	3.4129915584415587	3.0	9.732992172241211	9.00360103208884	6.287396190692903	CN(C)C(=O)N[C@@H]1CC[C@H](CCN2[C@@H]3CC[C@H]2C[C@H](C3)Oc4cccc(c4)C(=O)N)CC1
1023	CHEMBL3810318	test	4.0	3.8074205882352943	3.196470588235296	4.292558670043945	1.7656462060127955	3.2655240131318326	CN(C)CCCN(C)c1ccc(Nc2cc(NC3CC3)n4ncc(C#N)c4n2)cc1NC(=O)C
1024	CHEMBL3236368	train	4.0	4.010006088356089	4.0	3.033445358276367	3.3530106269216193	3.599115518388519	CN[C@@H](C)C(=O)N[C@H]1CCC[C@H]2C[C@H]3CCN(CC(C)c4ccccc4)C[C@H]3N2C1=O
1025	CHEMBL3236369	train	4.0	3.783875	3.1000000000000005	3.0289411544799805	-0.04718900076275715	2.466406788429306	CN[C@@H](C)C(=O)N[C@H]1CCC[C@H]2C[C@H]3CCN(CCc4c[nH]c5ccccc45)C[C@H]3N2C1=O
1026	CHEMBL3236080	train	4.0	4.157899675324675	3.3	4.109811782836914	3.7695759074266206	3.8343218413970526	CN[C@@H](C)C(=O)N[C@H]1CCC[C@H]2C[C@H]3CCN(CCc4ccc(C)cc4)C[C@H]3N2C1=O
1027	CHEMBL3236367	train	4.0	3.714867819598702	3.0	3.643547773361206	2.939447757973539	3.324465837733362	CN[C@@H](C)C(=O)N[C@H]1CCC[C@H]2C[C@H]3CCN(CCc4ccc(cc4)[N+](=O)[O-])C[C@H]3N2C1=O
1028	CHEMBL3236073	train	4.0	3.977750475912976	3.6177777777777775	3.8085033893585205	3.8257959890236197	3.8074569080182235	CN[C@@H](C)C(=O)N[C@H]1CCC[C@H]2C[C@H]3CCN(CCc4ccc(F)cc4)C[C@H]3N2C1=O
1029	CHEMBL3236076	test	4.0	3.9878713818860865	3.5	3.7935993671417236	2.9297351898127353	3.5528014847101366	CN[C@@H](C)C(=O)N[C@H]1CCC[C@H]2C[C@H]3CCN(CCc4ccc(OC)cc4)C[C@H]3N2C1=O
1030	CHEMBL3236075	train	4.0	4.011556349206349	3.0113636363636362	3.741060256958008	4.079800602583925	3.7109452112779793	CN[C@@H](C)C(=O)N[C@H]1CCC[C@H]2C[C@H]3CCN(CCc4cccc(OC)c4)C[C@H]3N2C1=O
1031	CHEMBL3236072	train	4.0	4.03914567752509	4.0	4.015069007873535	3.2382677595873046	3.823120611246482	CN[C@@H](C)C(=O)N[C@H]1CCC[C@H]2C[C@H]3CCN(CCc4ccccc4F)C[C@H]3N2C1=O
1032	CHEMBL3236074	train	4.0	3.8911212454212465	3.0	3.8843791484832764	5.424971056214099	4.050117862529655	CN[C@@H](C)C(=O)N[C@H]1CCC[C@H]2C[C@H]3CCN(CCc4ccccc4OC)C[C@H]3N2C1=O
1033	CHEMBL2207665	train	4.0	3.2418928571428567	3.0	3.3967835903167725	3.7469713314335005	3.3464119447232825	CN1C=C(C(=O)NC[C@@H](O)CN2CCC(CC2)Oc3ccc(Cl)c(Cl)c3)C(=CC1=O)C(F)(F)F
1034	CHEMBL2326472	test	4.0	3.645005590062114	3.9	-12.484781265258789	0.8593340527057328	-1.0201104056227355	Cn1cc(CN2CCc3cc4nc(N)sc4cc3CC2)cn1
1035	CHEMBL3261923	train	4.0	3.7364298701298706	3.2073333333333336	16.797565460205078	1.9913481591480509	6.4331692057040835	CN1Cc2cc(ccc2C1=O)c3ccc(C[C@H](NC(=O)[C@@H]4C[C@@H](O)CCN4)C#N)cc3
1036	CHEMBL3321972	train	4.0	3.887582142857143	3.919782608695652	3.927536964416504	3.3476839060139927	3.770646405495823	CN1CCC(CC1)c2ccc3nc(Nc4ccc(cn4)C(F)(F)F)[nH]c3c2
1037	CHEMBL3321968	train	4.0	4.005442406204907	3.251612903225806	5.290170669555664	3.526993068524302	4.01855476187767	CN1CCN(CC1)c2cc(Cl)c3nc(Nc4ccc(Br)cn4)[nH]c3c2
1038	CHEMBL3809764	train	4.0	3.619155594405594	3.0	3.5979678630828857	5.585815136070466	3.9507346483897363	CN1CCN(CC1)c2ccc(Nc3cc(NC4CC4)n5ncc(C#N)c5n3)cc2NC(=O)C
1039	CHEMBL2031233	train	4.0	3.7787242063492057	4.0	3.544100046157837	3.0438276571631255	3.5916629774175424	CN1CCN(CC1)c2ccc3N=CN(C(=O)c3c2)c4cc(NC(=O)C5CC5)ccc4C
1040	CHEMBL3321963	train	4.0	3.919707142857143	3.5105769230769233	4.152823448181152	2.9286085560392445	3.627929017538616	CN1CCN(Cc2ccc3nc(Nc4ccc(cn4)C(F)(F)F)[nH]c3c2)CC1
1041	CHEMBL3291063	test	4.0	3.7122403846153866	3.5	4.380642414093018	4.830085511872227	4.105742077645157	Cn1ncc(C(=O)N2[C@@H]3CC[C@H]2C[C@H](C3)Nc4n[nH]c5ccc(F)cc45)c1Cl
1042	CHEMBL3290766	train	4.0	3.7485595238095244	3.3754687500000005	4.368386268615723	2.200884030860068	3.423324643321329	Cn1ncc(C(=O)N2CCC(CC2)NC3=CC(=O)Nc4ccccc34)c1Cl
1043	CHEMBL2158562	train	4.0	3.6954287926764926	3.5	3.543102741241455	3.6926913839670936	3.60780572947126	COc1cc(Cl)c(cc1OC)c2nc(SCC(=O)N(C)C)nc3[nH]cc(C#N)c23
1044	CHEMBL2335908	train	4.0	3.6372159090909095	3.439833333333333	4.014615058898926	3.473328362427476	3.641248165937661	COc1cc2nc(Nc3ccc(cc3)[C@@H](C)NC(=O)C)ncc2cc1c4ccncc4
1045	CHEMBL2011119	train	4.0	3.7230465367965366	3.2044303797468343	3.598750352859497	6.072886986280223	4.149778563920773	COc1ccc(cc1)[C@@H](C)Nc2nc(nc3C(=O)N(Cc23)C(C)C)N4CCN(CC4)C(=O)C
1046	CHEMBL379828	train	4.0	3.265752536231884	3.3516935483870998	3.2353713512420654	3.9420378600407857	3.4487138239754587	COc1ccc2c(c1)c(c(C)n2CC(=O)O)c3ccnc4cc(Cl)ccc34
1047	CHEMBL2163591	test	4.0	3.3713999999999995	3.4	3.2231714725494385	3.0704527939708535	3.266256066630073	CS(=O)(=O)c1cccc2c3CN(CCc3[nH]c12)C(=O)[C@@H]4CCCC[C@H]4C(=O)NC5(CC5)C#N
1048	CHEMBL60088	train	4.0	3.4241999999999995	3.150000000000003	2.419938564300537	0.5814187799979162	2.393889336074614	NC(=N)c1cc2c(I)cccc2s1
1049	CHEMBL1223952	test	4.0	3.985521632956416	3.2288095238095242	3.0208749771118164	8.891614906044396	4.781705259980538	NC(=O)c1cccc(C[C@H]2C[C@H]3CC[C@@H](C2)N3Cc4ccccc4)c1
1050	CHEMBL1258279	train	4.0	3.8170803641456588	3.4	8.006893157958984	2.519690528606959	4.4359160126779	NC(=O)c1cccc(O[C@@H]2C[C@H]3CC[C@@H](C2)N3CC4CCCCC4)c1
1051	CHEMBL3289812	train	4.0	3.3921682900432892	3.0	1.9417176246643066	3.6458823141771934	2.994942057221197	Nc1nc2ccc(OC3CNC3)nc2n1CC(O)c4ccc(cc4Cl)C(F)(F)F
1052	CHEMBL1738761	train	4.0	3.021795555555556	3.100000000000001	2.9903032779693604	3.091240320469716	3.0508347884986584	NCC[C@@H](Oc1cc(Cl)ccc1C#N)c2ccccc2
1053	CHEMBL2208423	train	4.0	3.63195	4.0	3.2598049640655518	2.8148488297203236	3.426650948446469	O[C@H](CNC(=O)c1cccc(c1)C#N)CN2CCC(CC2)Oc3ccc(Cl)c(Cl)c3
1054	CHEMBL3817958	test	4.0	3.575159517720132	3.211666666666667	1.3239452838897705	29.566410246611824	9.419295428722098	O=C([C@@H]1CC=C[C@H]2CN(Cc3ccccc3)C(=O)[C@H]12)N4CCC[C@H]4C#N
1055	CHEMBL3127699	train	4.0	3.8644858333333336	4.0	3.8851592540740967	-5.193279847631154	1.639091309944069	O=C(C1CC12CCN(CC2)C3CCOCC3)N4CCN(CC4)C5CC5
1056	CHEMBL3127675	train	4.0	3.9821666666666653	3.858333333333333	2.343616247177124	-2.9410049171668518	1.8107778325025676	O=C(C1CC2(CCN(CC2)C3CCOCC3)C1)N4CCN(CC4)C5CCC5
1057	CHEMBL3261919	train	4.0	3.358233762838469	3.6	5.475489616394043	9.09282606230795	5.381637360385115	O=C(N[C@@H](Cc1ccc(cc1)c2ccc(cc2)C#N)C#N)[C@@H]3CCCCN3
1058	CHEMBL2158841	train	4.0	3.0	3.4	3.237650156021118	2.8457744936164557	3.1208561624093933	OC(=O)[C@H](Cc1ccc(F)cc1)N2CCC(CN3CCC(CC3)Oc4ccc(Cl)c(Cl)c4)CC2
1059	CHEMBL2158839	train	4.0	3.305	3.0	3.4208953380584717	3.3317180338270243	3.2644033429713737	OC(=O)[C@H](Cc1ccccc1F)N2CCC(CN3CCC(CC3)Oc4ccc(Cl)c(Cl)c4)CC2
1060	CHEMBL2158834	test	4.0	3.1270000000000007	3.1953488372093046	3.816558361053467	3.2586963221625562	3.349400880106332	OC(=O)c1cccnc1N2CCC(CN3CCC(CC3)Oc4ccc(Cl)c(Cl)c4)CC2
1061	CHEMBL2326695	train	4.0	3.801279477124183	4.0	4.0293989181518555	7.032821318867602	4.71587492853591	OCC[C@@]1(CCCCNC1)c2ccc(Cl)c(Cl)c2
1062	CHEMBL2321991	train	4.0	3.999966666666667	3.465098039215686	4.191576957702637	3.1753894553953708	3.70800777974509	OCC[C@@]1(CCCNC1)c2ccc(Cl)c(Cl)c2
1063	CHEMBL2321992	train	4.0	3.9960071428571435	4.0	4.133088111877441	4.149734220114091	4.069707368712169	OCC[C@]1(CCCNC1)c2ccc(Cl)c(Cl)c2
1064	CHEMBL57049	train	4.0	3.2822999999999998	3.3516935483870998	3.04728364944458	4.955578345529579	3.6592138858403147	CN1C=C(CC2=CN(CC(=O)N3CCN(CC3)c4ccc(Cl)cc4)C(=NC2=O)SCc5ccc(F)cc5)C=NC1=O
1065	CHEMBL2419518	train	4.0	3.5813443248272194	3.4323333333333337	3.3972275257110596	3.2457580184377695	3.4141658005773454	CC(C)n1cc(cn1)S(=O)(=O)c2ccc(CNC(=O)N3Cc4ccncc4C3)cc2
1066	CHEMBL2012955	train	4.0	4.0130714141414146	3.1606382978723393	3.997103691101074	4.612017963451431	3.945707841641565	Cc1nc2c(Cl)cccc2n1c3ccc(s3)C(=O)NC4CC4
1067	CHEMBL2012953	train	4.0	4.0011431746031745	3.632135922330097	3.9132118225097656	1.2541605372101845	3.2001628641633055	Cc1nc2c(F)cccc2n1c3ccc(s3)C(=O)NC4CC4
1068	CHEMBL2012951	train	4.0	3.7469687134502925	3.4	3.1058363914489746	4.6814020347411605	3.733551784910107	Cc1nc2c(OC(F)F)cccc2n1c3ccc(s3)C(=O)NC4CC4
1069	CHEMBL2012948	train	4.0	3.614203391812866	3.251612903225806	3.786872625350952	3.1218557841770176	3.44363617614166	Cc1nc2cc(ccc2n1c3ccc(s3)C(=O)NC4CC4)C(F)(F)F
1070	CHEMBL2012954	train	4.0	3.94700440824535	4.0	4.2037506103515625	3.2285800506351277	3.84483376730801	Cc1nc2ccc(F)cc2n1c3ccc(s3)C(=O)NC4CC4
1071	CHEMBL3684912	train	4.0	3.48855	3.4058333333333333	2.930269479751587	12.172860293803666	5.499378276722147	CCc1cc(Cl)ccc1[C@H]2COC(=N2)N
1072	CHEMBL3262595	test	4.0	3.305213357110726	3.3139999999999996	3.457014322280884	3.391035628858131	3.366815827062435	CN(C)CCNC(=O)c1cc(F)cc(c1)c2ccc3ncnc(N)c3n2
1073	CHEMBL2012950	train	4.0	3.7240639393939396	3.17375	4.8174920082092285	3.7781013933363887	3.8733518352348892	COc1cccc2c1nc(C)n2c3ccc(s3)C(=O)NC4CC4
1074	CHEMBL2387222	train	4.0	3.9077345543345556	3.8714285714285714	0.4946839213371277	2.5519770374453246	2.7064560211363946	F[C@@H]1C[C@@H]1C(=O)Nc2cc(NC(=O)c3c(F)cccc3Cl)ccn2
1075	CHEMBL2393173	train	4.0	3.2796950738916255	3.0	3.918898582458496	1.2225352192376637	2.8552822188969462	O[C@H]1CCC[C@@H](C1)NS(=O)(=O)c2ccc(NC(=O)NCc3cccnc3)cc2
1076	CHEMBL2393163	train	4.0	3.750537662337663	3.9	6.5085673332214355	7.9595104587028125	5.5296538635654775	O=C(NCc1cccnc1)Nc2ccc(cc2)S(=O)(=O)N3CCC4(CCNC4)CC3
1077	CHEMBL2037500	train	4.0	3.0041999999999995	3.072972972972973	3.364856719970703	3.95407426821475	3.3490259902896065	CC[C@@H](C)[C@H]1N([C@@H](C(=O)N2CCOCC2)c3ccc(C)nc3)C(=O)[C@H](NC1=O)C4Cc5ccccc5C4
1078	CHEMBL210803	train	4.0	3.988957142857142	4.0	6.03370475769043	1.9372229383965904	3.9899712097360407	Cc1ccc(cc1F)N2CC[C@H](C2)NC(=O)Nc3ccccc3Br
1079	CHEMBL2037497	train	4.0	3.6743000000000006	3.0	3.4136087894439697	3.0425667460415835	3.2826188838713883	Cc1ccc(cn1)[C@@H](N2[C@H](CC(C)(C)C)C(=O)N[C@H](C3Cc4ccccc4C3)C2=O)C(=O)N5CCOCC5
1080	CHEMBL207617	train	4.0	3.9771960784313722	4.0	3.9735054969787598	4.679692650531853	4.157598556485496	Cc1cccc(c1)N2CC[C@H](C2)NC(=O)Nc3ccccc3Br
1081	CHEMBL2037512	train	4.0	3.213	3.988888888888889	3.770540952682495	3.76295203408663	3.6838454689145035	CCC(CC)[C@H]1N([C@@H](C(=O)NC)c2ccc(C)nc2)C(=O)[C@H](NC1=O)C3Cc4ccccc4C3
1082	CHEMBL215324	train	4.0	3.741315476190477	4.1	4.69343900680542	-1.140722279071512	2.8485080509810965	CN1CCCc2ccc(NC(=O)c3ccc(nc3)c4ccccc4)cc12
1083	CHEMBL381086	train	4.0	4.0026392857142845	4.0	4.540053844451904	3.500200927424076	4.010723514397566	Fc1ccc(cc1F)N2CC[C@H](C2)NC(=O)Nc3ccccc3Br
1084	CHEMBL207618	train	4.0	3.9821711872441288	3.9625000000000004	3.985994338989258	8.829334991441604	5.190000129418747	Fc1cccc(c1)N2CC[C@H](C2)NC(=O)Nc3ccccc3Br
1085	CHEMBL1258110	train	4.0	3.6696363636363634	3.1942769230769232	4.880259990692139	11.452520217626295	5.79917337375793	O=C1O[C@@]2(CC[C@@H](CNc3nc(cs3)c4ccccn4)CC2)CN1c5ccccn5
1086	CHEMBL1094192	test	4.0	3.599656330311566	3.0	3.8560352325439453	3.4592642832808562	3.478738961534092	CC(C)\N=C\1/S\C(=C/c2ccc(O)c(Cl)c2)\C(=O)N1c3ccccc3
1087	CHEMBL1097801	train	4.0	3.6440239495798328	3.0	3.92400860786438	8.162778257127961	4.682702703643043	CC(C)\N=C\1/S\C(=C/c2ccc(OCCO)cc2)\C(=O)N1c3ccccc3
1088	CHEMBL3313969	train	4.0	3.2660003952569174	3.15	4.0698699951171875	1.368805628000797	2.9636690045937253	Cc1ccncc1c2cc(F)c3c(CCc4nnc(C)n34)c2
1089	CHEMBL1095833	train	4.0	3.9943983766233764	3.3725000000000027	3.6859469413757324	5.5005476168800245	4.138348233719784	CCC\N=C\1/S\C(=C/c2ccc(OC[C@@H](O)CO)c(Cl)c2)\C(=O)N1c3ccccc3C
1090	CHEMBL1097184	train	4.0	3.992873809523809	3.0	3.4320383071899414	3.774404877115451	3.5498292484573004	CCC\N=C\1/S\C(=C/c2ccc(OCC(O)CO)c(Cl)c2)\C(=O)N1c3ccccc3C
1091	CHEMBL1096873	test	4.0	3.587944047619047	3.3754761904761836	3.4082674980163574	18.721192830992706	7.273220141776074	CCC\N=C\1/S\C(=C/c2ccc(OCCO)c(Cl)c2)\C(=O)N1c3ccccc3C
1092	CHEMBL537203	train	4.0	3.8638181818181807	3.0	3.618290424346924	17.282537077789872	6.941161420988744	Cl.Fc1ccc(cc1)C2CNC(=O)C23CCN(CC3)C4(CCCCC4)c5ccsc5
1093	CHEMBL1917429	train	4.0	3.3781775432900427	3.2810810810810813	3.5087125301361084	3.50835058623835	3.4190804351863955	Cc1c(Sc2ccc(Cl)cc2)c3cc(Cl)c(cc3n1CC(=O)O)C#N
1094	CHEMBL1165720	train	4.0	3.3729999999999993	3.9	4.089486122131348	2.7702035998604018	3.5331724304979373	CCN(C1CCN(CCC(c2ccccc2)c3ccccc3)CC1)C(=O)NCc4cc(F)ccc4F
1095	CHEMBL1668262	train	4.0	4.0033	4.0	-0.06825911998748779	-0.5658554680630027	1.8422963529873773	COc1ccc(c(Cl)n1)c2nc3cc(F)c(F)cc3n2[C@@H](C4CCCCC4)C(=O)N[C@@H]5CC[C@H](CC5)C(=O)O
1096	CHEMBL261847	train	4.0	3.2567738095238092	3.0	3.115452766418457	2.9370465606455287	3.0773182841469486	OC(=O)CN1C(=O)C2(CC(=O)N(Cc3cc(F)cc(F)c3)C2=O)c4cc(Cl)ccc14
1097	CHEMBL669	train	4.07	3.6633	3.1	1.4281890392303467	-4.92643141333414	0.8162644064740519	CN(C)CCC=C1c2ccccc2C=Cc3ccccc13
1098	diazepam	train	4.07	3.5574869565217386	4.0	6.220644950866699	4.1421396354072595	4.480067885698924	C1=CC=C(C=C1)C2C3C(=CC=C(Cl)C=3)N(C)C(=O)CN=2
1099	CHEMBL3127130	train	4.1	3.378030588235294	3.1	2.9716641902923584	4.074165636606799	3.3809651037836126	CC(C)COc1ccc(cc1C#N)C2=C(C#N)C(=O)NC(=N2)N
1100	CHEMBL3321871	train	4.1	3.9293519225872173	3.465098039215686	3.0836341381073	0.4750286301212454	2.7382781825078624	CN1CCN(CC1)c2ccc3nc(Nc4ccc(Br)cn4)[nH]c3c2
1101	CHEMBL3353410	train	4.1	3.7969722222222213	4.0	3.391786575317383	2.3272391742098706	3.3789994929373686	COc1cc(N(C)CCN(C)C)c(NC(=O)C=C)cc1Nc2nccc(n2)c3cn(C)c4ccccc34
1102	CHEMBL2431146	train	4.1	3.6634	3.1	2.523499011993408	41.05214482698833	12.584760959745434	Cl.O=C1C2CCCN2C(=O)N1CCCCNCCOc3ccccc3
1103	CHEMBL1649673	test	4.1	3.7888027950310565	3.3	3.2559168338775635	1.6594779009962006	3.0010493824762055	CC(=O)NCc1ccc(cc1)n2nc(c3CCCCc23)C(F)(F)F
1104	CHEMBL1242904	train	4.1	3.582857142857143	3.4	3.8416712284088135	-0.07264421448901316	2.6879710391942355	Cc1ccc2c(cccc2n1)N3CCN(CCc4cccc5c4OCc6nccn56)CC3
1105	CHEMBL1531981	test	4.17	3.6998644270584498	3.0392156862745097	4.002167701721191	2.605545096795392	3.336698227962386	Cc1oc(cc1C(=O)Nc2cccc(c2)C(=O)O)c3ccccc3
1106	CHEMBL1766779	train	4.17	3.4923588235294125	3.4	4.4116973876953125	10.387523574551393	5.42289494644403	CS(=O)(=O)c1ccc(cc1)c2cnc(N)c(n2)C(=O)Nc3ccccc3
1107	CHEMBL1779194	train	4.2	3.9408666666666665	3.308333333333333	5.12271785736084	6.7723988872152345	4.786079186144018	CC(=O)NCCOc1ccc2C(=O)c3c([nH]c4cc(ccc34)C#N)C(C)(C)c2c1
1108	CHEMBL3676329	test	4.2	3.711607516339869	4.0	3.524447202682495	3.1731431505749943	3.6022994673993396	Cc1nc2cc(ccc2[nH]1)n3ncc(C(=O)c4cc5ccc(Br)cc5[nH]4)c3N
1109	CHEMBL1934268	train	4.2	3.7127396825396817	4.50425925925926	5.5790605545043945	0.4424114562576597	3.5596177381402487	CCn1nc(C)c(C(=O)N[C@@H](C)C(C)(C)C)c1NS(=O)(=O)c2ccc(C)cc2
1110	CHEMBL3934547	train	4.2	4.244444444444439	4.0	3.4755301475524902	1.392605713079556	3.2781450762691215	Nc1c(cnn1c2ccc3nc[nH]c3c2)C(=O)c4cc5ccccc5[nH]4
1111	CHEMBL2070951	train	4.2	3.6273166666666663	3.041772151898734	6.218206882476807	5.243717339560141	4.532753260150587	O=C(NC1(CC1)C#N)[C@@H]2CCCC[C@H]2C(=O)N3CCN(CC3)c4nc5cnccc5s4
1112	CHEMBL2386647	test	4.2	3.6873333333333345	4.0	11.345466613769531	3.552783087375752	5.646395758619654	C[C@@H](O)c1nc2cnc3[nH]ccc3c2n1C4CCN(CCC#N)CC4
1113	CHEMBL2402729	test	4.2	4.163000000000001	3.4	4.050156593322754	0.8027956064735179	3.103988049949068	CC(C)(C)C[C@@H]1N[C@H]([C@H](c2cccc(Cl)c2F)[C@@]1(C#N)c3ccc(Cl)cc3F)C(=O)Nc4ccn(CC(C)(C)O)n4
1114	CHEMBL4088737	test	4.2	3.7786285714285732	3.0	4.451737403869629	11.828279624393472	5.764661399922918	CC(C)c1cc([nH]n1)C(=O)N2CC[C@H](C2)NC(=O)C3CC3
1115	CHEMBL2206059	train	4.2	3.6324000000000014	4.0	3.2814249992370605	2.0085070619663457	3.2305830153008515	CS(=O)(=O)NCc1nc2cnc3[nH]ccc3c2n1[C@@H]4C[C@H]5CC[C@@H]4C5
1116	CHEMBL3684915	train	4.2	3.5641999999999996	4.0	3.6096742153167725	16.05783159292035	6.807926452059281	NC1=N[C@H](CO1)c2ccc(Cl)cc2C3CC3
1117	CHEMBL399656	train	4.2	3.5825000000000005	4.0	-0.7293714284896851	8.218237423421046	3.7678414987328406	CCNc1cc(cc(c1)C(=O)N[C@@H](Cc2ccccc2)[C@H](O)CNCc3cnn(CC)c3)N4CCCCS4(=O)=O
1118	CHEMBL4062668	train	4.3	3.4223999388292854	3.1000000000000005	3.6975533962249756	2.8424599238870094	3.265603314735318	Cc1cc([C@@H]2CN(CC(F)(F)C2)C(=O)c3cc(C)c(F)c(F)c3)n4ncnc4n1
1119	CHEMBL1784338	train	4.3	3.639421212121213	3.1	3.523695468902588	7.810695672215624	4.518453088309856	Cc1cc(CCC2CCN(CC2)S(=O)(=O)CC3(CCOCC3)N(O)C=O)c(C)cn1
1120	CHEMBL1824673	train	4.3	3.483840627917834	3.4	3.900692939758301	3.9801429995811284	3.6911691418143158	CCCc1cc(ccn1)c2nc(cs2)c3ccc(NS(=O)(=O)C)cc3
1121	CHEMBL2386634	train	4.3	3.5030000000000014	3.558333333333333	3.498721122741699	1.6735074031814108	3.058390464814111	C[C@@H](O)c1nc2cnc3[nH]ccc3c2n1[C@@H]4CC[C@@H](CC4)C#N
1122	CHEMBL556506	train	4.3	3.431658823529412	4.0	4.379587173461914	-6.158152943665077	1.4132732633315623	C[C@H](C1=C(CCN(C)C)Cc2ccccc12)c3cnccn3
1123	CHEMBL3623043	train	4.3	3.4021000000000003	3.027654320987655	2.5994715690612793	4.478645090995489	3.3769677452611058	CNC(=O)C1Cc2c(F)c(F)c(F)cc2N1C(=O)COc3ccc(Cl)cc3
1124	CHEMBL2402737	train	4.3	4.1748999999999965	3.3516935483870998	4.054162502288818	4.328747904581443	3.977375988814339	COc1cc(ccc1NC(=O)[C@@H]2N[C@@H](CC(C)(C)C)[C@@](C#N)([C@H]2c3cccc(Cl)c3F)c4ccc(Cl)cc4F)C(=O)O
1125	CHEMBL1834683	train	4.3	4.040428787878787	4.2	6.2456464767456055	3.5267365295626236	4.503202948546754	CCC(C)N(CC(=O)Nc1cc(F)cc(F)c1)C(=O)c2ccc(cc2)c3ccccn3
1126	metoprolol	train	4.3	4.208099999999999	3.425	3.3267509937286377	20.420580337367397	7.8451078327740085	COCCC1C=CC(OCC(CNC(C)C)O)=CC=1
1127	CHEMBL3941474	train	4.4	4.149057142857136	3.6333333333333333	3.6577188968658447	1.476255339472028	3.2290911781320855	Nc1c(cnn1c2ccc3[nH]ccc3c2)C(=O)c4cc5ccccc5[nH]4
1128	CHEMBL3262590	train	4.4	3.378566666666667	3.0386363636363636	1.5529634952545166	4.286698515404129	3.0642162602404186	Nc1ncnc2ccc(nc12)c3ccnc(F)c3
1129	CHEMBL463881	train	4.4	3.387000000000001	4.0	1.9803000688552856	3.294207984477516	3.1653770133332007	C[C@@H]1CN(Cc2ccc(cc2)c3cccnc3C(=O)N4CCC(CC4)Nc5cccc(F)c5)C[C@H](C)N1
1130	CHEMBL1649654	train	4.4	3.743550396825397	3.9	4.124340057373047	5.575340170028922	4.335807656056842	CN(CCc1ccccc1)C(=O)c2ccc(cc2)n3nc(c4CCCCc34)C(F)(F)F
1131	CHEMBL2031559	test	4.47	3.631433747412009	3.3750000000000004	4.03678560256958	5.054656140028158	4.024468872502437	FC(F)(F)c1cc(C(=O)Nc2cccc(c2)c3nnn[nH]3)c4nc[nH]c4c1
1132	CHEMBL252502	test	4.5	3.6079000000000003	3.4	3.0850932598114014	3.199373681150947	3.323091735240587	CC(=O)N1CCC(CN2CCC(CC2)NC(=O)Nc3cc(cc(c3)C(F)(F)F)C(F)(F)F)CC1
1133	CHEMBL3233043	train	4.5	3.7911476190476185	3.0217391304347827	5.67238712310791	2.7768111216281426	3.8155212485546137	CN[C@@H](C)C(=O)N[C@H]1CCC[C@H]2C[C@H]3CCN(CCc4ccccc4)C[C@H]3N2C1=O
1134	CHEMBL1272072	test	4.5	3.61387977915804	3.196470588235296	4.03214168548584	-6.008266538685861	1.2085563785483289	O=C(N[C@@H]1CN2CCC1CC2)c3cccc4oc(nc34)C5CC5
1135	CHEMBL2164673	test	4.5	3.1935104575163393	3.095038759689923	3.3739471435546875	16.186170048514185	6.462166602318784	O=C(NCC#N)[C@@H]1CCCC[C@H]1C(=O)N2CCC=CC2
1136	CHEMBL2386640	train	4.5	3.3980478114478117	3.4380952380952383	3.4265432357788086	4.643248540005728	3.726483706331897	C[C@@H](O)c1nc2cnc3[nH]ccc3c2n1C4CCCCC4
1137	CHEMBL2165603	train	4.5	3.2875	3.9349999999999996	-0.1540660262107849	0.6221079807132681	1.922635488625621	Clc1cc(Cl)cc(c1)S(=O)(=O)CC2=CC(=O)NN2
1138	CHEMBL1084132	train	4.5	3.3179000000000003	3.0	6.382162094116211	7.0277563272991985	4.9319546053538525	C(C1CCCCN1)N2CCN(C2)c3ccccc3
1139	CHEMBL1209685	train	4.5	3.9759264444444438	4.0	3.441409111022949	1.271615041711028	3.172237649294605	C[C@H](NC(=O)[C@H]1NCC[C@@H]1O)c2ccc(cc2)c3noc(CCC4CCCCC4)n3
1140	CHEMBL1090089	train	4.57	3.4798393055555557	3.5	3.6109461784362793	3.577244911413967	3.5420075988514506	CN1C(=O)C(=Cc2cnc(NC(CCO)CCO)nc12)Oc3ccc(F)cc3F
1141	CHEMBL2431079	train	4.6	3.5820480158730157	3.0	3.587407112121582	3.417566022603602	3.3967552876495497	Cc1noc2[C@H](CC(=O)N)N=C(c3ccc(cc3)C#N)c4c(C)c(C)sc4c12
1142	CHEMBL3601323	test	4.6	3.5769000000000006	3.3754761904761836	3.848430633544922	2.328037324102919	3.282211037031006	COc1cc2CC(=O)N([C@@H](c3ccc(Cl)cc3)c2cc1OC(C)C)c4ccc(cc4)N(C)C[C@@H]5CC[C@H](CC5)N(C)C
1143	CHEMBL4065992	train	4.6	3.667824170274171	3.632135922330097	3.5439224243164062	3.7186535444657465	3.6406340153466052	COCCN1[C@H](C)Cc2[nH]c(cc2C1=O)c3nc(Nc4ccnn4C)ncc3C
1144	CHEMBL2386652	test	4.6	4.391	3.2786944444444446	3.872318744659424	3.2166111482629804	3.6896560843417125	C[C@@H](O)c1nc2cnc3[nH]ccc3c2n1[C@@H]4CCCOC4
1145	CHEMBL3427277	test	4.6	3.5568	3.196470588235296	1.1565184593200684	0.416073009464878	2.0814655142550604	CCS(=O)(=O)CCc1c(CN2C(=O)N(C3CC3)c4ccncc24)nc5cc(Cl)ccn15
1146	CHEMBL2431042	train	4.6	3.5217	4.0	5.41263484954834	23.88613656526201	9.205117853702587	Cl.CCc1ccccc1OCCNCCCCN2C(=O)C3CCCN3C2=O
1147	CHEMBL3415446	train	4.6	3.326251984126986	3.8	3.1470088958740234	-1.9810720535614648	2.0730472066098864	ONC(=O)c1ccc(NC2CCN(C2=O)c3ccccc3)cc1
1148	CHEMBL510311	train	4.67	6.142400000000008	3.138333333333333	2.8071510791778564	-2.556390714696663	2.3828734244536336	CC(=O)O[C@@]12CO[C@@H]1C[C@H](O)[C@]3(C)[C@@H]2[C@H](OC(=O)c4cccc(F)c4)[C@]5(O)C[C@H](OC(=O)[C@H](O)[C@@H](NC(=O)OC(C)(C)C(F)F)c6ccccc6)C(=C([C@@H](O)C3=O)C5(C)C)C
1149	CHEMBL3236071	train	4.7	3.8637504759129757	3.5434782608695654	3.6839160919189453	3.8232995494276616	3.728611094532287	CN[C@@H](C)C(=O)N[C@H]1CCC[C@H]2C[C@H]3CCN(CCc4ccc(Br)cc4)C[C@H]3N2C1=O
1150	CHEMBL1940313	train	4.7	3.478999999999998	4.0	2.8151793479919434	-2.237128931126637	2.014262604216326	O[C@]1(CN2CCC1CC2)C#Cc3ccc(Oc4ccc(cc4)C(=O)NC5CCN(CC5)C6CC6)cc3
1151	CHEMBL1689112	train	4.7	3.522069047619048	3.0	3.1822264194488525	3.438245461724157	3.2856352321980147	OC(=O)COc1ccc(cc1CN2CCN(CC2)C(=O)c3ccccc3)C(F)(F)F
1152	CHEMBL445990	train	4.7	3.4939	3.1	3.2739436626434326	7.0069498236083945	4.218698371562956	Oc1noc2cc(Cl)ccc12
1153	CHEMBL244084	test	4.7	3.2862499999999994	3.1291666666666664	1.4912424087524414	1.7717548431696126	2.4196034796471797	Cc1oc(nc1)c2ccc3CCN(CCCSc4nnc(c5cccc6nc(C)ccc56)n4C)CCc3c2
1154	CHEMBL1221913	test	4.7	3.3629759018759016	3.3750000000000004	-2.636704206466675	23.983524679599306	7.021199093752133	FC(F)CN1C[C@@H]([C@H](C1)C(=O)Nc2ccc(cc2F)N3C=CC=CC3=O)C(=O)Nc4ccc(Cl)cn4
1155	CHEMBL1801370	train	4.7	3.5986047619047623	3.3754687500000005	2.863293409347534	1.2972813496038218	2.7836620677140296	Cc1nc(c2ccccc2)n(C)c1CC(=O)NCc3ccc(F)c(F)c3F
1156	diphenhydramine	test	4.73	3.1645999999999996	4.0	5.776398181915283	-0.8840725655315669	3.0142314040959293	CN(C)CCOC(C1=CC=CC=C1)C2=CC=CC=C2
1157	dimethylformamide (DMF)	train	4.75	14.08736666666667	3.15	0.9168139696121216	64.49957754613536	20.663439545603538	O=CN(C)C
1158	CHEMBL190	test	4.79	3.0860882352941186	3.1492187500000033	3.828970432281494	5.165913639830094	3.8075477643514275	CN1C(=O)N(C)c2[nH]cnc2C1=O
1159	CHEMBL4071576	train	4.8	3.4728271929824563	3.3516935483870998	4.052799224853516	4.700219160468491	3.8943847816728905	C[C@@H]1Cn2cc(cc2C(=O)N1Cc3cccc(C)n3)c4nc(Nc5ccnn5C)ncc4C
1160	CHEMBL3321873	test	4.8	4.019835125019911	3.211666666666667	4.480416297912598	2.3191401571659744	3.507764561691288	CN1CCN(CC1)c2ccc3nc(Nc4ccc(C)cn4)[nH]c3c2
1161	CHEMBL3290767	train	4.8	3.6276571910820086	3.9	3.8606784343719482	2.4374849957397626	3.4564551552984297	Cn1ncc(C(=O)N2CCC(CC2)NC3=CC(=O)Nc4ccc(F)cc34)c1Cl
1162	CHEMBL1940288	train	4.8	3.399999999999998	3.243661971830985	5.657844066619873	0.3984414971082382	3.1749868838897735	COc1cc(CNC(=O)c2ccc(Oc3ccc(cc3)C#C[C@]4(O)CN5CCC4CC5)cc2)cc(OC)c1
1163	CHEMBL2170872	test	4.8	3.7665571428571427	3.4729545454545456	3.749377727508545	3.2378772874567185	3.556691675819238	COc1cc2NC(=C(C(=O)OCCO)C(=O)c2cc1F)c3cccc(Oc4ccccc4)c3
1164	CHEMBL1915112	test	4.8	3.745999999999999	3.1291666666666664	1.983916997909546	7.054544011485137	3.9784069190153373	Cl.OC(COc1ccccc1C(=O)CCc2ccc(F)cc2)CN3CCN(CC3)C(c4ccccc4)c5ccccc5
1165	CHEMBL3593777	train	4.8	3.5003503968253966	4.0	3.7179739475250244	3.942705967936631	3.790257578071763	NC(=O)c1cnc2[nH]ccc2c1N[C@@H]3CCN(C[C@@H]3F)c4ccc(cn4)C#N
1166	CHEMBL492720	train	4.8	3.5467597402597404	3.4	2.7518250942230225	3.7027791134243127	3.350340986976769	Cc1cc(Nc2ccc(c(F)c2)C(F)(F)F)n3ncnc3n1
1167	CHEMBL1784347	train	4.9	3.962183333333331	3.1000000000000005	3.808356761932373	6.0951767069348115	4.2414292005501295	Cc1onc(C)c1CCC2CCN(CC2)S(=O)(=O)CC3(CCS(=O)(=O)CC3)N(O)C=O
1168	CHEMBL1783268	test	4.9	3.5334575187969928	3.862337662337662	3.5136654376983643	3.1652938930148715	3.5186886279619727	COc1ccc(OC)c(c1)c2cccc3c(N)c4C(=O)N(C)Cc4nc23
1169	CHEMBL1223819	train	4.9	3.3238000000000003	3.4	4.56662654876709	1.2537737599624654	3.136050077182389	FC(F)(F)C1=Nc2ncccc2C(=O)N1
1170	CHEMBL1688458	train	4.9	3.436799318394024	3.6177777777777775	1.9393658638000488	-0.6057780836904199	2.0970412190703573	OC(=O)CCc1ccc(OCc2cccc(Oc3ccccc3)c2)cc1
1171	CHEMBL2402731	train	4.9	4.241000000000005	3.9	3.0133581161499023	3.3592159961174533	3.62839352806684	CC(C)(C)C[C@@H]1N[C@H]([C@H](c2cccc(Cl)c2F)[C@@]1(C#N)c3ccc(Cl)cc3F)C(=O)Nc4ccc(cc4)C(=O)O
1172	CHEMBL2419601	train	4.9	3.8038000000000007	3.1000000000000005	3.8306360244750977	3.5236560540449826	3.56452301963002	CC(C)(C)n1cc2OC3(CCN(CC3)C(=O)c4ccc5[nH]ncc5c4)CC(=O)c2n1
1173	CHEMBL3740844	test	4.9	3.6577190415296563	4.0	3.479559898376465	7.432685714513268	4.642491163604848	CC(C)N1C[C@@H]2[C@@H](CNC(=O)c3nc(C(C)C)n4ccccc34)[C@@H]2C1
1174	CHEMBL3359265	train	4.9	4.096999999999997	3.9	3.03344464302063	3.9914576758501985	3.7554755797177064	CC(C)n1ncc2CC3(CCN(CC3)C(=O)c4ccc5nc(C)[nH]c5c4)CC(=O)c12
1175	CHEMBL465244	train	4.9	3.675842857142858	3.5	-1.5765314102172852	-5.125921949835276	0.11834737427257402	C[C@@H]1CN(Cc2ccc(cc2)c3ccccc3CN(C)C(=O)COc4ccccc4)C[C@H](C)N1
1176	CHEMBL1632217	train	4.9	3.487	3.2044303797468343	8.570535659790039	-1.188301834953822	3.5184160511457625	Cc1ccc2c(cccc2n1)N3CCN(CCc4cccc(NC(=O)c5cnccn5)c4)CC3
1177	CHEMBL521889	test	4.9	3.5040652492435123	3.8530327868852448	11.059822082519531	2.2345976357460993	5.162879438598597	Cc1cccc(C)c1CNc2cc(cn3c(C)c(C)nc23)N4CCNC4=O
1178	CHEMBL552373	test	4.9	3.7966485825768435	3.196470588235296	3.183708906173706	4.275565978402134	3.613098513846995	FC(F)(F)C1CCN(CCN2CCN(C2=O)c3cccc(c3)C#N)CC1
1179	CHEMBL1163538	train	4.93	3.9084547619047614	4.0	1.8233402967453003	2.8597746403894098	3.147892424759868	Fc1ccc(cc1)C(=O)C2CCN(CC2)C(=O)c3ccc(cc3)c4ccccc4
1180	CHEMBL3787109	test	5.0	3.5196499766573286	3.8386086956521726	1.772451400756836	2.0682984070054173	2.7997521200179385	C[C@@H](N1C=Cc2ncccc2C1=O)c3nnc4c(F)cc(cn34)c5cnn(C)c5
1181	CHEMBL3220244	train	5.0	3.7776363636363635	3.15	2.8783891201019287	-1.5531121582627183	2.0632283313688933	C[C@@H]1CN(CCN1c2ncc(OCc3ccncc3C#N)cn2)C(=O)OC4COC4
1182	CHEMBL233263	train	5.0	3.5559296296296306	3.6714285714285713	6.887788772583008	4.087912252872905	4.5507648066285284	C[C@H](CO)Nc1nc(SCc2occc2)nc3nc(N)sc13
1183	CHEMBL1916288	train	5.0	4.195266666666666	3.0	3.7152209281921387	3.6768821034246324	3.646842424570859	C[C@H](NC(=O)c1c(C)nn(c1NS(=O)(=O)c2ccc(cc2)C#N)c3ccc(F)cc3)C(C)(C)C
1184	CHEMBL1934420	train	5.0	4.308399999999997	3.9	4.00461483001709	2.5021827170926962	3.678799386777446	C[C@H](NC(=O)c1c(C)nn(C2CCN(C)CC2)c1NS(=O)(=O)c3ccc(C)cc3)C(C)(C)C
1185	CHEMBL4100278	train	5.0	4.124647619047619	4.0	3.6108057498931885	18.041696815795852	7.444287546184165	C[C@H]1[C@@H](O)CC(=O)N1c2ccc(C#N)c(Cl)c2C
1186	CHEMBL1689119	train	5.0	3.220309523809523	3.0	3.453385591506958	2.7186908950211186	3.0980965025844	C[C@H]1CN(Cc2cc(Cl)ccc2OCC(=O)O)CCN1S(=O)(=O)c3ccccc3
1187	CHEMBL2338409	train	5.0	3.828193921568628	4.0	3.6020689010620117	4.2079175884797815	3.9095451027776056	CC(C)(C)NC(=O)NCCN1CCC(CNC(=O)c2cc(Cl)cc(Cl)c2)C1
1188	CHEMBL2338406	train	5.0	4.031528571428572	3.0	3.4629735946655273	3.7057804479142393	3.5500706535020847	CC(C)(C)NC(=O)NCCN1CCC(CNC(=O)c2cc(Cl)cc(Cl)c2)CC1
1189	CHEMBL2057371	train	5.0	3.6399999999999992	3.3	3.4504613876342773	3.6345003397102023	3.5062404318361198	CC(C)(C)NS(=O)(=O)c1cncc(c1)c2ccc3nc(NC(=O)NCC(=O)N4CCCC4)nn3c2
1190	CHEMBL2057372	train	5.0	3.7029999999999994	3.4	0.9539929628372192	1.7764032916192944	2.4583490636141283	CC(C)(C)NS(=O)(=O)c1cncc(c1)c2ccc3nc(NC(=O)NCC(=O)N4CCOCC4)nn3c2
1191	CHEMBL1257376	train	5.0	3.805928787878787	3.5	3.0974104404449463	3.6524383712692083	3.513944399898236	CC(C)N1CCC(CC1)Oc2ccc3c(c2)cc4C(=O)N(Cc5ccc(F)cc5)CCn34
1192	CHEMBL2376320	train	5.0	4.493157142857141	3.4	4.07851505279541	3.434560420855536	3.851558154127022	CC[C@]1(C)NC(=O)c2cc(ccc2NC1=O)S(=O)(=O)Nc3ccc(cc3)C(F)(F)F
1193	CHEMBL2376303	train	5.0	3.3367233918128654	3.8	2.887843370437622	4.138676921955332	3.5408109210514547	CC[C@]1(C)NC(=O)c2cc(ccc2NC1=O)S(=O)(=O)Nc3ccc(F)cc3F
1194	CHEMBL4101232	train	5.0	3.8564499999999997	3.4	8.978195190429688	0.9140984227048005	4.287185903283622	CC[C@H]1[C@H](O)[C@H](C)N(C1=O)c2ccc(C#N)c(Cl)c2
1195	CHEMBL196707	train	5.0	3.3821736111111114	3.9	2.474484920501709	4.235339429393756	3.4979994902516443	Cc1c(CC(=O)O)c2cc(F)ccc2n1S(=O)(=O)c3ccc(cc3)S(=O)(=O)C
1196	CHEMBL1478592	train	5.0	3.170833333333333	3.3	1.671931505203247	2.4201651068729597	2.640732486352385	Cc1c(sc2ncnc(O)c12)C(=O)Nc3ccccc3
1197	CHEMBL1956499	train	5.0	3.642192121212121	3.1606382978723393	4.513448715209961	3.4595525301073895	3.6939579161004525	Cc1cc(Nc2ccc(cc2)C(F)(F)F)n3nc(CCO)nc3n1
1198	CHEMBL1738786	train	5.0	3.828000000000001	3.5	3.6717114448547363	3.1564365231451257	3.539036991999966	Cc1cc(Nc2ccc(cc2)C(F)(F)F)n3nc(nc3n1)C(C)(F)F
1199	CHEMBL1956290	test	5.0	4.902	3.4	3.853477716445923	2.9088768415866295	3.766088639508138	Cc1cc(Nc2ccc(cc2)C(F)(F)F)n3nc(nc3n1)C(F)(F)F
1200	CHEMBL1956278	train	5.0	4.05106236606531	3.9942857142857147	3.865558385848999	3.1092416958012863	3.7550370405003273	Cc1cc(Nc2ccc(cc2)C(F)(F)F)n3nc(nc3n1)C4CC4
1201	CHEMBL1956285	train	5.0	5.477267460317461	5.861702127659575	8.341377258300781	3.6494262140959983	5.832443265093454	Cc1cc(Nc2ccc(cc2)S(F)(F)(F)(F)F)n3nc(nc3n1)C(C)(F)F
1202	CHEMBL1956291	train	5.0	6.7278911239332935	5.8075	4.006521224975586	3.9983337728386883	5.135061530436892	Cc1cc(Nc2ccc(cc2)S(F)(F)(F)(F)F)n3nc(nc3n1)C(F)(F)F
1203	CHEMBL1956279	test	5.0	44.62900171958221	8.310951476793253	20.456235885620117	12.609708262782368	21.501474336194487	Cc1cc(Nc2ccc(cc2)S(F)(F)(F)(F)F)n3nc(nc3n1)C4CC4
1204	CHEMBL2041978	train	5.0	13.760671532125565	9.3	37.90802764892578	23.670308135022783	21.159751829018532	Cc1ccc(cn1)c2cc(cnc2N)c3ccc(cc3)S(=O)(=O)C
1205	CHEMBL209689	test	5.0	58.22559278860028	18.0	130.21592712402344	74.86724078719537	70.32719017495478	Cc1ccc2c(c1)c(c(C)n2CC(=O)O)c3ccnc4c(C)cccc34
1206	CHEMBL1917461	train	5.0	17.162641390829062	10.0	20.453754425048828	-1.8332466911864496	11.44578728117286	Cc1ccc2c(n1)c(Sc3ccc(Cl)cc3)c(C)n2CC(=O)O
1207	CHEMBL1956288	test	5.0	21.022250054582337	14.062853185595596	18.660490036010742	0.8288439563936387	13.643609308145578	CCC(F)(F)c1nc2nc(C)cc(Nc3ccc(cc3)C(F)(F)F)n2n1
1208	CHEMBL1956289	test	5.0	61.22119773396541	9.0	22.27629852294922	4.989069213828295	24.371641367685733	CCC(F)(F)c1nc2nc(C)cc(Nc3ccc(cc3)S(F)(F)(F)(F)F)n2n1
1209	CHEMBL2376322	test	5.0	55.815480500812235	17.53518518518517	54.9500732421875	74.22199975728756	50.630684671368115	CCC1(C)NC(=O)c2cc(ccc2NC1=O)S(=O)(=O)Nc3ccccc3
1210	CHEMBL2376327	test	5.0	59.252327020398035	22.0	28.054615020751953	20.881214010201727	32.54703901283793	CCC1(C)NC(=O)c2cc(ccc2NC1=O)S(=O)(=O)Nc3ccccc3Cl
1211	CHEMBL1956264	train	5.0	19.40069264730642	9.0	15.837137222290039	41.46594221050544	21.425943020025475	CCc1nc2nc(C)cc(Nc3ccc(cc3)C(F)(F)F)n2n1
1212	CHEMBL1956265	train	5.0	27.602432914397465	12.605031446540865	22.077659606933594	19.7280809622321	20.503301232526006	CCc1nc2nc(C)cc(Nc3ccc(cc3)S(F)(F)(F)(F)F)n2n1
1213	CHEMBL3808860	train	5.0	51.86431886465385	24.005769230769236	60.973854064941406	23.529940982567982	40.09347078573312	CCN(CCN)c1ccc(Nc2cc(NC3CC3)n4ncc(C#N)c4n2)cc1NC(=O)C
1214	CHEMBL3402538	train	5.0	31.03586818515225	25.0	37.03669738769531	32.131688053713226	31.301063406640196	CCn1c(C)nnc1C(C)NS(=O)(=O)c2ccc(Cl)cc2
1215	CHEMBL3605521	train	5.0	42.161500623059744	15.339999999999998	31.347644805908203	30.552108742360407	29.850313542832087	CCn1c(nc2cc(ccc12)C(=O)N)[C@@H](C)NS(=O)(=O)c3ccc(Cl)cc3
1216	CHEMBL3605524	test	5.0	56.642702192173545	23.926393442622942	57.55695724487305	51.30174615441375	47.35694975852083	CCn1c(nc2ccc(cc12)S(=O)(=O)C)[C@@H](C)NS(=O)(=O)c3ccc(Cl)cc3
1217	CHEMBL2070615	train	5.0	47.83773441966826	23.5	55.77800369262695	42.60394059796233	42.429919677564385	CCNC(=O)Nc1ncc(s1)c2cc(nc(n2)c3cnccn3)c4c(C)cc(OC)cc4C
1218	CHEMBL2171078	train	5.0	139.58223657295252	50.11999999999995	152.41427612304688	154.48475349863986	124.1503165486598	CCOC(=O)C1=C(Nc2cc(OC)ccc2C1=O)c3cccc(c3)c4ccccc4
1219	CHEMBL2011122	train	5.0	59.71834784234437	31.0	30.401966094970703	36.87265095705305	39.49824122359203	CCOc1ccc(cc1)[C@H](Nc2nc(nc3C(=O)N(Cc23)C(C)C)N4CCN(CC4)C(=O)C)C(F)(F)F
1220	CHEMBL1956473	test	5.0	6.130325765076533	7.1305555555555555	5.729108810424805	3.981430632060094	5.742855190779246	CCOc1nc2nc(C)cc(Nc3ccc(cc3)S(F)(F)(F)(F)F)n2n1
1221	CHEMBL2171035	train	5.0	6.959393838430162	25.416666666666668	0.9795017242431641	-5.978265764305577	6.844324116258605	Clc1ccc(cc1)S(=O)(=O)NC(=O)N2CCC(CC2)N3CCC(CC3)Oc4ccc(Cl)c(Cl)c4
1222	CHEMBL1290183	train	5.0	57.24971439291981	18.0	103.8935317993164	108.68141282077114	71.95616475325184	Clc1cccc(CN2CCC3(CC2)CCN(CC3)C(=O)c4ccccc4)c1
1223	CHEMBL2010844	train	5.0	65.43423373246686	26.8	49.23862075805664	3.752713969210984	36.30639211493362	CN([C@H]1CCN(Cc2ccc(cc2)C(F)(F)F)C[C@H]1F)C(=O)Cc3ccc(cc3)n4cnnn4
1224	CHEMBL100391	train	5.0	56.86950748798329	22.41594705882353	40.52467346191406	82.43568055419227	50.56145214072829	CN(C)CC(O)COc1ccc(Nc2ncc(Cl)c(Nc3ccccc3)n2)cc1
1225	CHEMBL2010838	train	5.0	13.783385557729078	20.92916666666667	19.747100830078125	-6.314202368165491	12.036362671577097	CN(C1CCN(Cc2ccc(cn2)C(F)(F)F)CC1)C(=O)Cc3ccc(cc3)n4cnnn4
1226	CHEMBL2441576	train	5.0	47.922727589285714	24.0	103.52616882324219	31.775825796969386	51.80618055237433	Cn1cc(N)c(n1)C(=O)N2N=C3CCCC[C@@H]3[C@@]2(O)C(F)(F)F
1227	CHEMBL2031464	train	5.0	38.41339355931209	18.0	18.734275817871094	41.07645649027765	29.056031466865207	CN1CCN(CC1)c2ccc3N=CN(C(=O)c3c2)c4cc(ccc4C)C(=O)NC5CCC5
1228	CHEMBL2042002	train	5.0	38.434723693013474	17.978386342756192	51.45894241333008	42.34778682892265	37.5549598195056	CNC(=O)c1ccc(cc1)c2cc(cnc2N)c3ccc(cc3)S(=O)(=O)C
1229	CHEMBL3961163	train	5.0	41.62748509468107	20.0	50.86819839477539	75.5925132082175	47.02204917441849	COc1cc(c(F)cc1N2C(=O)C=Cc3cc(ccc23)S(=O)(=O)Nc4ccon4)c5ccc(F)c(C)c5
1230	CHEMBL3921528	train	5.0	64.77077950861438	27.866666666666703	48.180519104003906	31.111290471630124	42.982313937728776	COc1cc(c(F)cc1N2C(=O)C=Cc3cc(ccc23)S(=O)(=O)Nc4ccon4)c5cccc(OC(F)F)c5
1231	CHEMBL3937744	train	5.0	30.48443258636273	20.249636192893433	36.24087905883789	36.887892626691865	30.96571011619648	COc1cc(ccc1Cl)c2cc(OC)c(cc2F)N3C(=O)C=Cc4cc(ccc34)S(=O)(=O)Nc5ncccn5
1232	CHEMBL3979498	train	5.0	54.65724716852404	22.37357798165138	17.30304527282715	13.100952492833757	26.85870572895908	COc1cc(ccc1N2C(=O)C=Cc3cc(ccc23)S(=O)(=O)Nc4ncccn4)c5cccc(c5)C(F)(F)F
1233	CHEMBL211631	train	5.0	56.21473434047105	19.964464285714275	69.56414794921875	97.47155736535994	60.80372598519101	COc1cccc2c(ccnc12)c3c(C)n(CC(=O)O)c4ccc(C)cc34
1234	CHEMBL3787004	train	5.0	36.586411294487036	23.54626865671637	29.743131637573242	18.799274133982912	27.168771430689894	COc1cnc2C=CN([C@H](C)c3nnc4c(F)cc(cn34)c5cnn(C)c5)C(=O)c2c1
1235	CHEMBL3785374	train	5.0	44.672844669635076	20.0	47.62991714477539	44.692060200216766	39.24870550365681	COc1cnc2C=CN([C@H](C)c3nnc4ccc(cn34)c5cnn(C)c5)C(=O)c2c1
1236	CHEMBL2041992	train	5.0	23.850012260443638	10.0	26.659198760986328	17.942726311314956	19.61298433318623	CS(=O)(=O)c1ccc(cc1)c2cnc(N)c(c2)c3ccc(cc3)C#N
1237	CHEMBL2042003	train	5.0	22.689828623791776	9.27364864864865	29.334754943847656	-1.4415590511784928	14.964168291277398	CS(=O)(=O)c1ccc(cc1)c2cnc(N)c(c2)c3ccc(cc3)C(=O)N
1238	CHEMBL2041993	train	5.0	38.49723589751125	29.0	25.846588134765625	3.2828799443041796	24.156675994145264	CS(=O)(=O)c1ccc(cc1)c2cnc(N)c(c2)c3ccc(cc3)S(=O)(=O)C
1239	CHEMBL3087375	train	5.0	66.2926720261258	56.0	85.27776336669922	74.18260471775392	70.43826002764473	FC(F)(F)c1ccc(NC(=O)C[N+]23CCC(CC2)[C@H](C3)OC(=O)C4(CCCCCC4)C5=CC=CC5)cn1
1240	CHEMBL193240	train	5.0	64.2726104620106	20.44736842105263	56.6552619934082	57.117359525967345	49.62315010060969	FC(F)Oc1ccc(cc1OCC2CC2)C(=O)Nc3c(Cl)cncc3Cl
1241	CHEMBL3093581	train	5.0	72.92494080122488	60.79814814814816	67.9708251953125	53.23604033182036	63.73248861912648	Fc1cc(NC(=O)C2=CC=CN(C2=O)c3ccccc3)ccc1Oc4ccc5nc(NC(=O)C6CC6)cn5c4
1242	CHEMBL1078685	test	5.0	61.58595547619048	28.0	29.654760360717773	27.216833805482135	36.614387410597594	N#Cc1cc(ccn1)c2n[nH]c(n2)c3ccncc3
1243	CHEMBL591931	train	5.0	43.42095306818182	19.82000000000001	44.97563171386719	46.53959459790995	38.68904484498974	NC(=N)c1cc2c(cccc2s1)c3ccccc3
1244	CHEMBL3347689	test	5.0	51.41024710319363	19.82295617529876	24.189537048339844	11.09212813008674	26.628717114229744	NC(=O)c1cccc(c1)c2ccc3c(c2)sc4c(N)ncnc34
1245	CHEMBL3289804	train	5.0	33.80578333045259	23.916353685445987	19.09818458557129	27.47048082224313	26.07270060592825	Nc1nc2cnccc2n1CC(O)c3ccc(Cl)cc3Cl
1246	CHEMBL3347507	train	5.0	60.49087225919913	22.0	42.34580993652344	20.20277336247425	36.25986388954921	Nc1ncnc2c3ccc(cc3sc12)c4cccc(c4)c5nn[nH]n5
1247	CHEMBL1807823	train	5.0	64.58352380837789	27.84	49.51275634765625	31.61698438272383	43.3883161346895	O[C@@H](CNCCSCCCNCCc1ccccc1)c2ccc(O)c3NC(=O)Sc23
1248	CHEMBL2069806	test	5.0	44.49118715345601	19.25	41.33858871459961	50.17514202100235	38.81372947226449	O=C(NC1CCCCC1)c2oc(CS(=O)(=O)c3ccccc3)nn2
1249	CHEMBL2069802	train	5.0	90.46487306865927	28.0	92.02943420410156	90.96666930815925	75.36524414523002	O=C(NCc1ccncc1)c2oc(CS(=O)(=O)c3ccccc3)nn2
1250	CHEMBL313907	test	5.0	63.7607087558609	19.050000000000004	42.743465423583984	75.35843328256627	50.22815186550279	O=S(=O)(Nc1nc(nn1Cc2ccccc2)c3ccccc3)c4ccccc4
1251	CHEMBL2158837	test	5.0	46.059002390292726	18.695080831408777	3.2092838287353516	41.63012210631928	27.398372289189034	OC(=O)[C@H](Cc1ccccc1Cl)N2CCC(CN3CCC(CC3)Oc4ccc(Cl)c(Cl)c4)CC2
1252	CHEMBL3752893	test	5.0	44.80020700057869	24.0	45.41756057739258	51.549037772050994	41.44170133750556	OC(=O)CCNc1nc(cc(n1)c2nccs2)N3CCc4ccccc4CC3
1253	CHEMBL3754555	train	5.0	89.24983456446196	52.0	57.56786346435547	62.19269528104124	65.25259832746467	OC(=O)CCNc1nc(cc(n1)n2cc3ccccc3n2)N4CCc5ccccc5CC4
1254	CHEMBL1689115	test	5.0	26.54855115276752	9.0	1.0365747213363647	0.37926474580255803	9.24109765497661	OC(=O)COc1ccc(Cl)cc1CN2CCCN(CC2)S(=O)(=O)Cc3ccccc3
1255	CHEMBL1689111	train	5.0	28.978753527992193	19.0	35.436405181884766	25.349110021467833	27.1910671828362	OC(=O)COc1ccc(Cl)cc1CN2CCN(CC2)S(=O)(=O)Cc3ccccc3
1256	CHEMBL2430737	train	5.0	35.07633310623346	14.47419414893617	21.736228942871094	39.67967299133082	27.741607297342888	C[C@@H](Nc1nc(cnc1N)c2cccc(c2)C(=O)O)c3ccccc3
1257	CHEMBL3604499	train	5.0	38.554775585519195	22.337209302325583	26.306365966796875	37.85900830199616	31.264339789159457	CC(C)(C)c1ccc(cc1)S(=O)(=O)Nc2ccc(Cl)cc2c3nccnc3NCCO
1258	CHEMBL3814736	train	5.0	39.715231244762855	8.05	12.495988845825195	4.733901876879968	16.248780491867006	CC(C)(C)c1ccc(Cn2c(cc3ncc(Cl)cc23)C(=O)O)cc1
1259	CHEMBL1783736	train	5.0	36.6831732120599	8.0	50.86994934082031	67.41322225209477	40.74158620124375	Cc1ccc(NC(=O)[C@H](CC2CCCC2)N3C=CC(=CC3=O)S(=O)(=O)C)nc1
1260	CHEMBL2393167	train	5.0	13.49355139380757	14.320149435215956	7.2404937744140625	-2.385978954405978	8.167053912257902	CC1CCN(CCN1)S(=O)(=O)c2ccc(NC(=O)NCc3cccnc3)cc2
1261	CHEMBL1270959	train	5.0	11.040158900817111	8.2	-1.546757698059082	-10.007500319354238	1.9214752208509478	Cc1cnc(NC(=O)[C@H](CC2CCCC2)N3C=CC(=CC3=O)S(=O)(=O)C)cn1
1262	CHEMBL2012957	train	5.0	24.793465152777788	10.0	23.580730438232422	51.71408787277707	27.52207086594682	Cc1nc2c(Br)cccc2n1c3ccc(s3)C(=O)NC4CC4
1263	CHEMBL2012962	train	5.0	50.440556906836875	10.0	1.6128653287887573	5.901988276549154	16.988852628043695	Cc1nc2c(Cl)cc(F)cc2n1c3ccc(s3)C(=O)NC4CC4
1264	CHEMBL3623137	train	5.0	28.646855775014032	18.0	11.848098754882812	21.80483622808916	20.0749476894965	CCC(=O)N1CC(C1)NC(=O)c2cnc(N)c3nc(ccc23)c4cccc(F)c4
1265	CHEMBL4094822	train	5.0	51.95000210087398	20.734711111111114	25.8784122467041	56.443358392075815	38.751620962691256	CCOC(=O)C1=C(CN2CCO[C@H](C)[C@H]2C(=O)O)NC(=N[C@H]1c3ccc(F)cc3Br)c4nccs4
1266	CHEMBL1783749	train	5.0	51.9005415642309	22.0	75.32511138916016	90.8231422271073	60.01219879512459	CCS(=O)(=O)C1=CC(=O)N(C=C1)[C@@H](CC2CCOCC2)C(=O)Nc3ccc(C)cn3
1267	CHEMBL3297766	train	5.0	48.32582272412427	25.0	41.78989791870117	75.34358871554511	47.61482733959264	CN(C)C1CCN(C[C@@H](NC(=O)C[C@H]2CNC(=O)c3cc(cn23)c4cccc(Cl)c4)C5CCCCC5)CC1
1268	CHEMBL480816	test	5.0	51.699026002555485	24.0	9.92000675201416	26.90161854447786	28.130162824761875	CN(C)CCN1CCn2c(c3ccccc3C1)c(C4CCCCC4)c5ccc(cc25)C(=O)O
1269	CHEMBL2177587	train	5.0	7.35664313847509	8.065909090909086	3.6324620246887207	-6.52235117001454	3.1331657710145895	CN1C[C@@H]([C@H](C1)c2ccc(\C=C\C(=O)Nc3ccccc3N)cc2)C(=O)Nc4ccc(Cl)cc4
1270	CHEMBL2178231	train	5.0	6.656136793078802	9.348038461538462	2.806879997253418	-8.581150813594315	2.5574761095690914	CN1C[C@@H]([C@H](C1)c2ccc(\C=C\C(=O)Nc3ccccc3N)cc2)C(=O)Nc4ccc(F)cc4
1271	CHEMBL3814811	train	5.0	41.14141791637085	27.76721893491124	30.144004821777344	10.581312389057002	27.40848851552911	COCC(C)(C)c1ccc(Cn2c(cc3ncc(Cl)cc23)C(=O)O)cc1
1272	CHEMBL4066996	train	5.0	12.29532101442586	20.779097715827348	7.5182576179504395	5.457731661777939	11.512602002495397	F[C@@H]1C[C@H](N(C1)S(=O)(=O)c2ccc(F)cc2)C(=O)NCc3cc(ncn3)c4ccc(nc4)C(F)(F)F
1273	CHEMBL2393171	test	5.0	8.740665148869066	16.187837837837836	-1.2939424514770508	3.7104812859301024	6.836260455289988	N[C@@H]1CC[C@H](CC1)NS(=O)(=O)c2ccc(NC(=O)NCc3cccnc3)cc2
1274	CHEMBL3606021	train	5.0	37.785670245844656	18.599999999999998	37.18461608886719	24.39756357549137	29.4919624775508	NC(=O)c1cc(F)cc2CN(C3CCN(CC3)C4CCC(F)(F)CC4)C(=O)c12
1275	CHEMBL2393183	train	5.0	10.277784470762676	10.613413513513512	8.644903182983398	9.992857167167454	9.882239583606761	Nc1ccc(CNC(=O)Nc2ccc(cc2)S(=O)(=O)c3ccccc3)cn1
1276	CHEMBL2419525	train	5.0	49.11206068484353	20.0	25.984590530395508	24.43930197450367	29.88398829743568	O=C(NCc1ccc(cc1)S(=O)(=O)C2CCN(CC2)C3CCOCC3)N4Cc5ccncc5C4
1277	CHEMBL2393187	train	5.0	11.340790714651064	17.316605940594076	3.4474055767059326	10.331958608020095	10.609190209992791	O=C(NCc1cnccn1)Nc2ccc(cc2)S(=O)(=O)c3ccccc3
1278	CHEMBL1963307	train	5.0	132.92210752310905	85.0	114.50872039794922	154.76043345497834	121.79781534400915	OC(COc1ccc(F)cc1C(=O)CCc2ccccc2)CN3CCN(CC3)C(c4ccccc4)c5ccccc5
1279	CHEMBL1215250	test	5.0	45.09857607843138	17.5	59.1106071472168	24.249258011815247	36.48961030936586	CC(C)[C@@H](NP(=O)(OC[C@H]1OC(C)(C)O[C@H]1C(=O)NO)Oc2ccccc2)C(=O)OC(C)(C)C
1280	CHEMBL2037504	train	5.0	27.75018557172044	18.0	24.00240707397461	30.41235193952656	25.0412361463054	CC[C@H](C)[C@H]1N([C@@H](C(=O)N(C)C)c2cc(C)cnc2C)C(=O)[C@H](NC1=O)C3Cc4ccccc4C3
1281	CHEMBL2037511	train	5.0	38.901930597388045	20.0	8.872967720031738	-4.406776466049992	15.842030462842448	CC[C@H](C)[C@H]1N([C@@H](C(=O)N2CCOCC2)c3ccc(C)nc3C)C(=O)[C@H](NC1=O)C4Cc5ccccc5C4
1282	CHEMBL2037509	train	5.0	10.10455811781698	25.363636363636363	6.5025715827941895	4.656525552233301	11.656822904120208	CC[C@H](C)[C@H]1N([C@@H](C(=O)NC)c2ccc(C)nc2C)C(=O)[C@H](NC1=O)C3Cc4ccccc4C3
1283	CHEMBL396883	train	5.0	56.19006546956115	23.492292968749997	37.01167297363281	54.88818607012663	42.895554370517644	CC(C)C1(C)OC(=NC1=O)NC2CCCCCC2
1284	CHEMBL237798	train	5.0	61.75620414285714	22.0	38.10373306274414	73.03810126223769	48.72450961695974	CC1(OC(=NC1=O)NC2C3CC4CC(CC2C4)C3)C(F)(F)F
1285	CHEMBL401048	train	5.0	26.06831231365005	26.0	24.380268096923828	83.21251619458756	39.91527415129036	CCC1(CC)OC(=NC1=O)NC23CC4CC(CC(O)(C4)C2)C3
1286	CHEMBL200141	train	5.0	64.94411120151914	19.0	45.8265380859375	50.43996245598506	45.05265293586043	CCCN1CNC(=O)C12CCN(CC2)[C@@H]3CCCC[C@@]3(O)c4ccccc4
1287	CHEMBL498185	train	5.0	35.62239234451876	22.13050640692637	33.625030517578125	36.71820564819369	32.024033729304236	CC(C)(O)Cn1cc(cn1)-c1ccc2c(c1)N(CCO2)c1nc2c(s1)C(=O)NC(C)(C)C2
1288	CHEMBL1784577	train	5.0	28.692125046702312	18.0	39.193668365478516	51.76250241382264	34.41207395650087	Cc1cc(Nc2cc(F)c(c(F)c2)C(F)(F)F)n3ncnc3n1
1289	CHEMBL1784589	train	5.0	60.494887401709406	23.0	47.77440643310547	34.114276086468294	41.34589248032079	Cc1cc(NC2Cc3ccccc3C2)n4ncnc4n1
1290	CHEMBL1784567	test	5.0	66.46187712470078	18.170873638676845	0.6874828934669495	7.161876755347216	23.12052760304795	Cc1cc(Nc2ccc(cc2)S(F)(F)(F)(F)F)n3ncnc3n1
1291	CHEMBL1784566	train	5.0	27.65038046367521	12.669488372093015	28.354957580566406	32.946659041417306	25.405371364437986	Cc1cc(Nc2ccc(SC(F)(F)F)cc2)n3ncnc3n1
1292	CHEMBL2408160	train	5.0	46.89188333333333	28.0	109.1659164428711	19.583289043347573	50.910272204888	Cc1cc(nn1C)C(=O)Nc2ccc(cn2)C#N
1293	CHEMBL1163185	train	5.0	103.07031887749676	55.0	117.56707000732422	74.17059235639088	87.45199531030298	CCN(C1CCN(CCC(C2CCN(Cc3cccnc3)CC2)c4ccc(F)cc4)CC1)C(=O)NCc5ccc(cc5)S(=O)(=O)C
1294	CHEMBL2036757	train	5.0	78.41882032736055	19.0	36.16632080078125	55.50045578475438	47.27139922822404	Clc1ccc(NC(=O)N2CCN(C[C@@H]3CCCN(C3)C4CC4)CC2)cc1Cl
1295	CHEMBL1651390	train	5.0	52.39569489857042	29.0	76.3282241821289	21.935949742487235	44.914967205796636	CN(C)CCNC1COc2ccccc2c3c(C4CCCCC4)c5ccc(cc5n3C1)C(=O)O
1296	CHEMBL1860146	train	5.0	133.26714583333336	20.0	138.2284393310547	-5.8198528308213	71.41893308339169	N=C(NC1CCCCC1)c2ccccc2c3ccccc3
1297	CHEMBL1861897	train	5.0	38.719309999999986	21.1	54.0286750793457	72.4999973049541	46.58699559607495	O\N=C(/CNC1CCCCC1)\c2ccccc2
1298	CHEMBL1861979	test	5.0	33.36301403081566	20.89026483516481	19.388446807861328	15.646319079054994	22.3220111882242	O\N=C(/NC1CCCCC1)\c2c(F)cccc2F
1299	CHEMBL1858782	test	5.0	124.46606178201661	16.97355805243444	81.6600112915039	91.74495090226182	78.7111455070542	O\N=C(/NCC1CC1)\c2ccccc2c3ccccc3
1300	CHEMBL1668240	train	5.0	22.70278004586372	32.33477299610891	26.30909538269043	11.236163018830695	23.14570286087344	OC(=O)[C@@H]1CC[C@H](CC1)NC(=O)[C@H](C2CCCCC2)n3c(nc4cc(F)c(F)cc34)c5ccc(Cl)cc5
1301	CHEMBL260672	train	5.0	3.189315829245725	6.8	1.4012150764465332	0.2646671070178279	2.913799503177522	OC(=O)CN1C(=O)[C@@]2(CC(=O)N(Cc3cc(Cl)ccc3F)C2=O)c4cc(Cl)ccc14
1302	CHEMBL2164671	train	5.1	24.044666666666682	18.67808219178082	18.51042366027832	-3.5551911792904427	14.419495334858844	CN(C)C(=O)[C@@H]1CCCC[C@H]1C(=O)NCC#N
1303	CHEMBL3545308	train	5.1	49.79843842557767	28.0	59.34048080444336	50.95375136298533	47.02316764825159	COc1cc(ccc1Nc2ncc(c(Nc3cccc(NC(=O)C=C)c3)n2)C(F)(F)F)N4CCN(CC4)C(=O)C
1304	CHEMBL4074311	train	5.1	45.012442890348105	26.627352941176472	64.37594604492188	38.320494808802316	43.58405917131219	COCCN1CCc2[nH]c(cc2C1=O)c3ccnc(Nc4ccnn4C)n3
1305	CHEMBL2011780	test	5.1	64.88918134561405	29.563580882352927	129.17864990234375	118.93295174556886	85.64109096896989	CC1(C)C[C@H](O)C[C@](C)(CNc2cc(cc(c2)S(=O)(=O)N)C(F)(F)F)C1
1306	CHEMBL2431038	test	5.1	100.85100542173917	50.0	182.5466766357422	119.36473236151507	113.1906036047491	Cl.O=C1C2CCCN2C(=O)N1CCCCNCCOc3cccc4ccccc34
1307	CHEMBL4101126	test	5.1	68.39295146017315	30.0	23.586463928222656	20.409864354203755	35.59731993564989	O=C(Nc1cccnc1)c2cc(ccc2OCc3ccccc3)c4ccncc4
1308	CHEMBL1090090	train	5.13	46.77945726066198	30.0	79.25186920166016	83.56346292677884	59.898697347275245	NC(=O)N(c1ccc(C(=O)N)c(n1)c2ccc(F)cc2F)c3c(F)cccc3F
1309	CHEMBL168899	test	5.13	48.701694590643285	19.2	33.8343505859375	70.1002519768131	42.959074288348475	OB1N(C(=O)Nc2ccccc12)c3ccccc3
1310	CHEMBL1682942	train	5.2	11.416447024018202	8.4	8.127500534057617	9.182662407231627	9.281652491326861	CC[C@H](NC(=O)c1c(C[S@@+](C)[O-])c(nc2ccccc12)c3ccccc3)c4ccccc4
1311	CHEMBL3233046	train	5.2	38.784624598103825	22.266666666666666	41.463993072509766	28.42201891480892	32.734325813022295	CN[C@@H](C)C(=O)N[C@H]1CCC[C@H]2C[C@H]3CCN(CCc4ccc(cc4)C(F)(F)F)C[C@H]3N2C1=O
1312	CHEMBL2386635	train	5.2	37.92919767098962	7.0	28.163869857788086	-10.567576228761528	15.631372825004046	C[C@@H](O)c1nc2cnc3[nH]ccc3c2n1[C@@H]4CC[C@@H](CC#N)CC4
1313	CHEMBL2386636	train	5.2	54.490586708971456	19.658169014084507	14.598566055297852	61.45164765785769	37.54974235905287	C[C@@H](O)c1nc2cnc3[nH]ccc3c2n1[C@@H]4CC[C@@H](CCC#N)CC4
1314	CHEMBL2386650	train	5.2	41.229290164886585	21.1	13.898111343383789	45.366088040626124	30.398372387224125	C[C@@H](O)c1nc2cnc3[nH]ccc3c2n1[C@@H]4CCCN(C4)C(=O)CC(F)(F)F
1315	CHEMBL3763358	test	5.2	72.26398273545789	21.333333333333332	85.71017456054688	85.46470682817703	66.19304936437878	COCCOc1cc2c(ncnc2cc1OC)n3nc(nc3N)c4ccccn4
1316	CHEMBL1835891	train	5.2	15.07800111800446	5.925000000000003	60.35224914550781	34.55643317412932	28.977920859410396	Fc1cc(F)cc(NC(=O)CN(C2CCCCC2)C(=O)c3ccc(cc3)c4ccccn4)c1
1317	CHEMBL503146	test	5.21	13.326567622914121	6.819090909090908	9.05688190460205	17.116409068399854	11.579737376251733	CC(=O)O[C@@]12CO[C@@H]1C[C@H](O)[C@]3(C)[C@@H]2[C@H](OC(=O)c4ccccc4)[C@]5(O)C[C@H](OC(=O)[C@H](O)[C@@H](NC(=O)OC(C)(C)C(F)(F)F)c6ccccc6)C(=C([C@@H](O)C3=O)C5(C)C)C
1318	CHEMBL1939560	train	5.25	76.76301509325396	23.0	71.73514556884766	86.18378626570303	64.42048673195116	C[C@@H](N(CC1CCS(=O)(=O)CC1)C(=O)Cc2ccc(c(F)c2)C(F)(F)F)C3=Nc4ncccc4C(=O)N3c5ccc(Cl)cc5
1319	CHEMBL1460615	train	5.25	26.93711874031	11.958100069930067	23.808948516845703	15.586282807832397	19.57261253372954	OC1CS(=O)(=O)CC1N2CCC(CC2)c3ccccc3
1320	CHEMBL3739863	train	5.3	46.50534292662347	19.634086956521738	11.494397163391113	10.257058987179304	21.972721508428908	[O-][N+](=O)c1cc(cc2nc(sc12)C3=N[C@@H](CO3)C(=O)N4CCCC4)C(F)(F)F
1321	CHEMBL3127115	train	5.3	20.883375577984367	19.13335877862596	2.6430516242980957	17.603510758675966	15.065824184896098	Cc1cc(cc(C#N)c1OCC2CCOC2)C3=C(Cl)C(=O)NC(=N3)N
1322	CHEMBL1221852	train	5.3	29.165393992893247	20.174	33.75095748901367	22.148952310817773	26.309825948181174	CCS(=O)(=O)N1C[C@@H]([C@H](C1)C(=O)Nc2ccc(cc2F)N3C=CC=CC3=O)C(=O)Nc4ccc(Cl)cn4
1323	CHEMBL177611	train	5.3	31.19128555801415	22.0	26.590341567993164	20.097481983376863	24.969777277346047	Clc1ccc(cc1)C(=O)N[C@H]2CN3CCC2CC3
1324	CHEMBL2382337	train	5.3	33.34234418327624	18.5	36.07097625732422	26.197440507406988	28.527690237001863	NS(=O)(=O)c1ccc(NC(=O)CSC2=NC(=C(C#N)C(=O)N2)c3ccc(Cl)cc3)cc1
1325	CHEMBL214268	train	5.3	13.11398064874134	17.056769874476988	13.540648460388184	20.52418122522983	16.05889505220909	O=C(N[C@H]1CN2CCC1CC2)c3cc4ccoc4cn3
1326	CHEMBL379302	train	5.3	6.9902125080741735	7.922222222222221	8.512676239013672	8.51183039499221	7.984235341075569	O=C(N[C@H]1CN2CCC1CC2)c3ccc4ccoc4c3
1327	CHEMBL378471	train	5.3	5.96542088643236	9.514444444444443	5.508017063140869	7.361170555347178	7.087263237341213	O=C(N[C@H]1CN2CCC1CC2)c3ccc4occc4c3
1328	CHEMBL2386638	train	5.3	18.418493906060597	8.0	32.645172119140625	16.299988453218848	18.84091361960502	OCCc1nc2cnc3[nH]ccc3c2n1C4CCCCC4
1329	CHEMBL465095	train	5.3	31.915591223964146	30.329999999999995	42.11246871948242	42.44905354093537	36.701778371095486	COc1cc(ccc1CN2C[C@@H](C)N[C@@H](C)C2)c3cccnc3C(=O)N4CCC(CC4)Nc5ccc(F)cc5
1330	CHEMBL1165640	test	5.3	29.470334752441303	22.0	19.94413948059082	24.817905250880333	24.058094870978113	[O-][N+](=O)c1cccc(c1)C(=O)N2CCC(CC2)C(=O)c3ccc(F)cc3
1331	CHEMBL2172212	train	5.33	103.20115284313724	31.0	181.07261657714844	180.41681985175734	123.92264731801076	NCCCN1C(=O)c2cc(N)ccc2C3=C1c4ccccc4C3=O
1332	CHEMBL284275	test	5.37	26.932435032051277	20.0	19.171892166137695	12.595598008680092	19.674981301717267	COc1ccc(Cc2c(N)n[nH]c2N)cc1
1333	CHEMBL3681317	train	5.4	34.24942319267008	18.779410170940174	23.126667022705078	13.677338630612702	22.45820975423201	Cc1nc2cc(ccc2[nH]1)n3ncc(C(=O)c4cc5ccc(cc5[nH]4)S(=O)(=O)C)c3N
1334	CHEMBL2431082	test	5.4	23.71426250501603	8.187933838951295	9.637079238891602	5.84502281250649	11.846074598841355	Cc1noc2[C@H](CC(=O)N)N=C(c3ccc(N)nc3)c4c(C)c(C)sc4c12
1335	CHEMBL1829174	train	5.5	82.72010180835285	54.0	56.37067794799805	80.03651747602572	68.28182430809416	Cc1cc(OCCCS(=O)(=O)C)cc(C)c1c2cccc(COc3ccc4[C@H](CC(=O)O)COc4c3)c2
1336	CHEMBL2431090	train	5.5	65.35538367414584	50.36666666666667	75.10636901855469	81.09206213816822	67.98012037438386	Cc1noc2[C@H](CC(=O)N)N=C(c3ccc(Cl)cc3)c4c(C)c(C)sc4c12
1337	CHEMBL1459588	train	5.5	65.29733100000001	30.0	68.89820861816406	49.24157604048629	53.35927891466259	CCCCCOc1ccc(cc1)C(=O)NC(C(C)C)C(=O)O
1338	CHEMBL1173055	train	5.5	26.35123011477266	9.72000000000001	29.94451904296875	34.27324813053707	25.072249322069624	CNCc1ccc(cc1)c2[nH]c3cc(F)cc4C(=O)NCCc2c34
1339	CHEMBL206200	train	5.5	37.955311742532615	24.0	102.1292953491211	32.67085744027958	49.18886613298332	COCCNc1nc(N)c2nc(O)n(Cc3ccccc3)c2n1
1340	CHEMBL518229	train	5.5	19.759346056405178	19.95	4.908274173736572	27.141486727139522	17.93977673932032	C[C@@H]1CN(Cc2ccc(cc2F)c3cccnc3C(=O)N4CCC(CC4)Nc5ccc(F)cc5)C[C@H](C)N1
1341	CHEMBL214350	train	5.6	63.23660425492286	23.0	58.28847885131836	142.534869621571	71.76498818195306	Cc1ccc2c(c1)c(c(C)n2CC(=O)O)c3ccnc4c(cccc34)C(F)(F)F
1342	CHEMBL1940286	train	5.6	35.53025455731687	27.0	29.48537254333496	26.927329592583217	29.735739173308765	COc1ccc(CNC(=O)c2ccc(Oc3ccc(cc3)C#C[C@]4(O)CN5CCC4CC5)cc2)nc1
1343	CHEMBL1956295	train	5.6	20.860901882987957	18.598676470588234	15.148697853088379	21.212108259969824	18.9550961166586	COCc1nc2nc(C)cc(Nc3ccc(cc3)S(F)(F)(F)(F)F)n2n1
1344	CHEMBL2386632	train	5.6	38.65670641685889	18.0	14.147446632385254	5.1648135337673855	18.992241645752884	C[C@@H](O)c1nc2cnc3[nH]ccc3c2n1[C@H]4CC[C@@H](C4)NCC(F)(F)F
1345	CHEMBL2386637	train	5.6	14.750708797619039	8.3	15.659143447875977	10.68735827820174	12.34930263092419	OCc1nc2cnc3[nH]ccc3c2n1C4CCCCC4
1346	CHEMBL1092774	test	5.7	57.54613833608226	25.799999999999997	55.65431594848633	70.20849894454462	52.3022383072783	CCOC(=O)C1=C(Nc2cc(OC)ccc2C1=O)c3cccc(OC)c3
1347	CHEMBL2171079	test	5.7	73.51044167056926	24.0	58.56012725830078	141.67173139373332	74.43557508065084	CCOC(=O)C1=C(Nc2cc(OC)ccc2C1=O)c3cccc(OCC)c3
1348	CHEMBL4086507	train	5.7	38.441136205254445	20.59550295857981	44.6439094543457	50.843785701945606	38.63108358003139	COCCN1[C@H](C)Cn2cc(cc2C1=O)c3nc(Nc4ccnn4C)ncc3C
1349	CHEMBL3826999	test	5.7	33.309156068158266	12.759533799533804	-1.1056926250457764	-9.666008407850283	8.824247208699003	CNCCNc1cc(nc2ccccc12)N3CCN(CC3)C(=O)C(C)(C)c4ccccc4
1350	CHEMBL1288170	train	5.7	53.82512700340623	19.367611940298517	52.40644836425781	47.73369887274113	43.33322154517592	CC(C)(C(=O)Nc1ccc(N2CCC(CC2)NCC3CC3)c(Cl)c1)c4ccccc4
1351	CHEMBL2158785	test	5.75	65.83338294146955	19.95	52.82040786743164	60.78504037532956	49.84720779605769	Cc1c(Cl)c(ccc1OC2CCN(CC3CCN(CC3)[C@@H](Cc4ccc(F)cc4)C(=O)O)CC2)C#N
1352	CHEMBL2325719	train	5.75	29.177777903164387	21.86761403508773	34.41316223144531	17.01123816502295	25.617448083680095	Cc1ccc2[nH]ccc2c1c3nc(cc(n3)C4(CC4)S(=O)(=O)C)N5CCOCC5
1353	CHEMBL12	test	5.75	43.771678972222226	19.0	24.052202224731445	6.226397321821432	23.262569629693775	CN1C(=O)CN=C(c2ccccc2)c3cc(Cl)ccc13
1354	CHEMBL451	test	5.75	51.238529645171674	20.64320000000001	62.6945915222168	37.24450525915225	42.95520660663518	CNC1=Nc2ccc(Cl)cc2C(=[N+]([O-])C1)c3ccccc3
1355	CHEMBL499248	train	5.75	77.92207333333334	23.50952380952381	26.299739837646484	20.455395228787076	37.04668305232268	CC(=O)O[C@@]12CO[C@@H]1C[C@H](O)[C@]3(C)[C@@H]2[C@H](OC(=O)c4cccc(F)c4)[C@]5(O)C[C@H](OC(=O)[C@H](O)[C@@H](NC(=O)OC(C)(C)C(F)(F)F)c6ccccc6)C(=C([C@@H](O)C3=O)C5(C)C)C
1356	dexamethasone	train	5.77	123.37683803418805	57.0	96.13258361816406	58.88028485848661	83.84742662770968	OCC(=O)[C@]1(O)[C@]2(C)[C@@H](C[C@@H]1C)[C@H]3[C@@]([C@@H](O)C2)(F)[C@]4(C)C(=CC(=O)C=C4)CC3
1357	CHEMBL2386641	train	5.8	13.312708063725497	8.0	9.865918159484863	10.532882627605307	10.427877212703915	CC(C)(O)c1nc2cnc3[nH]ccc3c2n1C4CCCCC4
1358	CHEMBL2386346	train	5.8	51.20221525862068	26.0	46.20841979980469	64.63627422926807	47.01172732192336	CCOc1cc(ccc1C2=N[C@@](C)(c3ccc(Cl)cc3)[C@](C)(N2C(=O)N4CCN(CCCS(=O)(=O)C)CC4)c5ccc(Cl)cc5)C(C)(C)C
1359	CHEMBL3798234	train	5.8	42.66695114716267	18.0	46.783931732177734	22.231715736855644	32.420649654049015	Nc1cccnc1C(=O)Nc2ccc(N3C(=O)c4ccccc4C3=O)c(Cl)c2
1360	CHEMBL1242623	train	5.8	14.012095313101916	54.13777777777778	7.311291694641113	2.4363775614202448	19.474385586735263	Cc1ccc2c(cccc2n1)N3CCN(CCc4cccc5c4OCc6c(ncn56)C(=O)N7CCCCC7)CC3
1361	CHEMBL1834685	train	5.8	85.99892224116519	15.68358490566038	113.69538879394531	103.61130045888386	79.74729909991369	COCC(C)N(CC(=O)Nc1cc(F)cc(F)c1)C(=O)c2ccc(cc2)c3ccccn3
1362	CHEMBL3297762	train	5.9	9.45228154189052	12.643693229166695	10.983716011047363	6.565119381294677	9.911202540849814	CN1CCN(C[C@@H](NC(=O)C[C@H]2CNC(=O)c3cc(cn23)c4cccc(Cl)c4)C5CCCCC5)CC1
1363	CHEMBL2022671	train	6.0	28.697613774444445	18.805223880597016	18.956802368164062	20.46665606268881	21.731574021473584	C[C@@H]1[C@H](O)[C@@](CO)(O[C@H]1N2C=CC(=NC2=O)N)N=[N+]=[N-]
1364	CHEMBL4071751	train	6.0	40.68497501146304	19.0	78.14713287353516	31.90771834706208	42.434956558015074	C[C@H]1[C@@H](O)CC(=O)N1c2ccc(C#N)c(Cl)c2
1365	CHEMBL2337980	train	6.0	46.649328684761905	9.5	21.500244140625	10.94582870774452	22.14885038328286	CC(C)(C)NC(=O)NCCN1CCC(O)(CNC(=O)c2cc(Cl)cc(Cl)c2)CC1
1366	CHEMBL441550	train	6.0	49.68675510160129	20.0	62.05339813232422	41.7752045821082	43.37883945400843	CC(C)N1C(=O)N(C)C(=O)c2c1sc(Cc3ccccc3C(F)(F)F)c2C(=O)N4CCS(=O)(=O)C4
1367	CHEMBL2011113	train	6.0	38.236888910946945	23.575913978494643	48.7039680480957	64.35526216642045	43.71800827598943	CC(C)N1Cc2c(NCc3ccc(Cl)cc3)nc(nc2C1=O)N4CCN(CC4)C(=O)C
1368	CHEMBL1257965	train	6.0	74.06469982041148	20.06875	21.511415481567383	79.00441979222036	48.66232127354981	CC(C)N1CCC(CC1)Oc2ccc3c(c2)cc4C(=O)N(CC5CC5)[C@H](C)Cn34
1369	CHEMBL2207664	train	6.0	43.32318616124339	26.0	99.09146881103516	156.4780878094461	81.22318569543117	Cc1c(Cl)ccc(OC2CCN(C[C@H](O)CNC(=O)C3=CNC(=O)C=C3C(F)(F)F)CC2)c1Cl
1370	CHEMBL1643194	train	6.0	39.60669119250204	24.87082706766916	51.16204833984375	35.865979248605065	37.876386462155004	Cc1cc(CN2Cc3ccccc3C2C(=O)Nc4ccc(Cl)cc4Cl)ccc1OCC(=O)O
1371	CHEMBL2171048	test	6.0	20.33705284212858	15.98709677419355	21.691055297851562	18.762775347401174	19.194495065393717	Cc1ccc(cc1)S(=O)(=O)NC(=O)N2CCC(CC2)N3CCC(CC3)Oc4ccc(Cl)cc4C
1372	CHEMBL1916278	train	6.0	46.26776247692241	21.0	60.291900634765625	7.771741246175222	33.83285108946581	Cc1ccc(cc1)S(=O)(=O)Nc2c(C(=O)NC3CCOCC3)c(C)nn2c4ccccc4
1373	CHEMBL3120300	train	6.0	42.63826871980677	23.0	68.17927551269531	61.43516847485351	48.8131781768389	CCc1cnc(s1)c2ccc(C)cc2NC(=O)O[C@@H]3C[C@@H]4[C@@H](C3)C(=O)N(C)CCCC\C=C/[C@@H]5C[C@]5(NC4=O)C(=O)NS(=O)(=O)C6CC6
1374	CHEMBL1224402	train	6.0	20.56594829926595	21.0	16.988271713256836	22.38128132712124	20.23387533491101	CCCC1(CCNC1)C(=O)c2cc(F)c3[nH]ccc3c2
1375	CHEMBL1086473	train	6.0	38.46097151553413	22.0	12.874971389770508	11.28492755810643	21.15521761585277	CCCCc1nc2c(N)nc3ccccc3c2n1Cc4ccccc4
1376	CHEMBL2022128	train	6.0	120.26552023809523	87.0	72.70565032958984	119.36161570433464	99.83319656800492	CCCCCS(=O)(=O)NC(=O)\C=C\c1ccc(OCCCS(=O)(=O)C)cc1Oc2ncc(cc2Cl)C(F)(F)F
1377	CHEMBL401158	train	6.0	52.428400855823135	51.0	71.27251434326172	98.8543320608595	68.38881181498608	CCCCNc1nc(SCCC)nc2c1nnn2[C@@H]3C[C@H](CO)[C@@H](O)[C@H]3O
1378	CHEMBL1778631	train	6.0	63.050590744444456	21.0	136.8652801513672	90.78509024145133	77.92524028431575	CCCCOc1ccccc1c2cc(ccc2OCC(=O)O)C(F)(F)F
1379	CHEMBL1163803	train	6.0	96.55082559027777	50.0	93.64578247070312	146.86284199697064	96.76486251448789	CCN(C1CCN(CCC(c2ccccc2)c3ccccc3)CC1)C(=O)NCc4c(F)cccc4F
1380	CHEMBL339457	train	6.0	73.42850455391604	22.98	68.34182739257812	107.01660503101864	67.9417342443782	CCN(CC)C(=O)c1ccc(cc1)C(=C2CCNCC2)c3cccc(F)c3
1381	CHEMBL426823	train	6.0	119.32062873376624	30.0	144.31886291503906	135.9001663353969	107.38491449605056	CCOc1oc2cc(OCCC3CCN(CC3)c4ccc(C)nn4)ccc2n1
1382	CHEMBL3093579	test	6.0	76.1495417981759	34.875	88.94442749023438	61.132114958813524	65.27527106180595	Cl.CC1=CC=C(C(=O)Nc2ccc(Oc3ccc4nc(NC(=O)C5CC5)cn4c3)c(F)c2)C(=O)N1c6ccccc6
1383	CHEMBL4074038	train	6.0	83.47567299498749	65.0	132.6709747314453	101.53542173697413	95.67051736585172	Clc1ccc(CN2C(=O)n3ncnc3c4c5CCN(Cc5sc24)C(=O)C6CC6)cc1
1384	CHEMBL2171043	train	6.0	16.48212816913179	21.90909090909091	27.922916412353516	16.49675451351628	20.702722501023125	Clc1cccc(c1)S(=O)(=O)NC(=O)N2CCC(CC2)N3CCC(CC3)Oc4ccc(Cl)c(Cl)c4
1385	CHEMBL2010845	test	6.0	10.185308316073833	10.279725274725275	5.129761219024658	3.9881787936538466	7.395743400869404	CN([C@@H]1CCN(Cc2ccc(cc2)C(F)(F)F)C[C@@H]1F)C(=O)Cc3ccc(cc3)n4cnnn4
1386	CHEMBL2010851	train	6.0	46.31895409625774	23.09807692307692	31.209758758544922	24.674059051502613	31.325212207345547	CN([C@@H]1CCN(Cc2ccc(cc2)C(F)(F)F)C[C@@H]1F)C(=O)Cc3ccc(cc3)S(=O)(=O)C
1387	CHEMBL452529	train	6.0	37.2325942	20.0	50.11113739013672	19.141389281479885	31.62128021790415	CN(C)CCCOc1ccc(cc1)c2cc(C(=O)N)c(NC(=O)N)s2
1388	CHEMBL2031238	train	6.0	42.337101025560926	22.0	45.294776916503906	69.66598718093098	44.82446628074895	CN1CCN(CC1)c2ccc3N=CN(C(=O)c3c2)c4cc(NC(=O)c5cocc5)ccc4C
1389	CHEMBL2010834	train	6.0	34.84189829863019	19.0	44.691593170166016	42.90886729061655	35.360589689853185	CNC(=O)c1ccc(CC(=O)N(C)C2CCN(Cc3ccc(cc3)C(F)(F)F)CC2)cc1
1390	CHEMBL3263996	test	6.0	29.3519456988124	22.0	19.87628936767578	26.400877522876943	24.40727814734128	CNS(=O)(=O)Nc1cc(CC2=C(C)c3ccc(OC(=O)N(C)C)cc3OC2=O)ccn1
1391	CHEMBL2086805	train	6.0	44.19538387044077	32.695	34.628501892089844	20.100815600566346	32.90492534077424	COc1c2C(=O)N(CC(=O)c3ccccc3)c4ccccc4c2n(C)c1C(=O)NC5CCN(CCO)CC5
1392	CHEMBL416	train	6.0	80.50884983333336	30.0	69.10969543457031	46.901086387580236	56.62990791387098	COc1c2OC(=O)C=Cc2cc3ccoc13
1393	CHEMBL2165017	test	6.0	43.749919941524986	21.0022627152318	28.74806022644043	46.04265351553348	34.885724099682676	COc1ccc(Nc2ncc(CN3CCN(CC3)S(=O)(=O)C)cc2c4nc(C)nc(N)n4)cn1
1394	CHEMBL1934416	train	6.0	86.6308953030303	21.0	133.9698028564453	92.0078953598336	83.4021483798273	COCC(C)n1nc(C)c(C(=O)N[C@@H](C)C(C)(C)C)c1NS(=O)(=O)c2ccc(C)cc2
1395	CHEMBL2207671	train	6.0	39.184205104188734	25.23678160919537	29.529394149780273	17.68182424118909	27.90805127608837	CS(=O)(=O)c1ccc2C(=CNC(=O)c2c1)C(=O)NC[C@@H](O)CN3CCC(CC3)Oc4ccc(Cl)c(Cl)c4
1396	CHEMBL2207662	test	6.0	39.00654772297146	24.35875	73.2471694946289	-0.2409973366397913	34.092867470240144	O[C@H](CNC(=O)C1=CNC(=O)C=C1C(F)(F)F)CN2CCC(CC2)Oc3ccc(Cl)c(Cl)c3
1397	CHEMBL2207656	train	6.0	23.896371361065686	13.222222222222221	51.868080139160156	35.40739265823986	31.09851659517198	O[C@H](CNC(=O)C1=CNC(=O)c2c(F)cccc12)CN3CCC(CC3)Oc4ccc(Cl)c(Cl)c4
1398	CHEMBL3786346	train	6.0	7.262774667157281	19.321243523316063	2.835202693939209	2.1632009906151284	7.89560546875692	O=C(N1CC(C1)Oc2ccc(CN3CC4(CCCO4)C3)cc2)c5oc(nn5)c6ccccc6
1399	CHEMBL3787166	test	6.0	88.93806919545852	34.0	74.2305908203125	126.72877080021593	80.97435770399673	O=C(N1CCC(CC1)Oc2ccc(CN3CCCC3)cc2)c4noc(n4)c5ccccc5
1400	CHEMBL1082811	train	6.0	57.450231400964306	20.94436464088398	34.88777160644531	77.1112060734711	47.59839343044118	O=C1NC(=NC(=C1C#N)c2ccccc2)SCc3ccccc3
1401	CHEMBL2158769	test	6.0	43.44331864253243	15.14436781609196	26.504274368286133	64.74004139366909	37.458000555144906	OC(=O)[C@H](Cc1ccccc1C#N)N2CCC(CN3CCC(CC3)Oc4ccc(Cl)c(Cl)c4)CC2
1402	CHEMBL2158823	train	6.0	33.896489555960905	9.474109589041095	11.407454490661621	-3.000901603398365	12.944288008066316	OC(=O)c1cccc(c1)N2CCC(CN3CCC(CC3)Oc4ccc(Cl)c(Cl)c4)CC2
1403	CHEMBL1778640	train	6.0	50.200595571082246	18.0	74.19322967529297	47.9872559647728	47.59527030278701	OC(=O)COc1ccc(cc1c2ccc3c(CCS3(=O)=O)c2)C(F)(F)F
1404	CHEMBL1778618	train	6.0	29.058874209523815	22.2	6.9627299308776855	40.098824934380865	24.580107268695592	OC(=O)COc1ccc(cc1c2ccccc2)C#N
1405	CHEMBL2207281	train	6.0	48.969334343536204	23.0	35.678314208984375	35.14978036644661	35.6993572297418	OCCNS(=O)(=O)c1ccc2C(=CNC(=O)c2c1)C(=O)NC[C@@H](O)CN3CCC(CC3)Oc4ccc(Cl)c(Cl)c4
1406	CHEMBL3651953	train	6.0	60.725507278354755	18.0	52.58890914916992	40.06228624752575	42.84417566876261	C[C@@H]1C[C@H](N)C[C@@H](C1)c2ccncc2NC(=O)c3ccc(F)c(n3)c4ccccc4F
1407	CHEMBL3676300	train	6.0	24.728109019591393	18.0	21.46297264099121	28.06972600777081	23.065201917088352	C[C@@H]1C[C@H](N)C[C@@H](C1)c2ccncc2NC(=O)c3csc(n3)c4c(F)cccc4F
1408	CHEMBL2419522	train	6.0	49.80818101190512	19.0	34.1795539855957	6.052764958893603	27.260124989098607	CC(=O)N1CCC(CC1)S(=O)(=O)c2ccc(CNC(=O)N3Cc4ccncc4C3)cc2
1409	CHEMBL2178578	train	6.0	32.05298328723286	18.725	35.61126708984375	68.76851810545638	38.789442120633254	CC(C)(C)c1ccc(cc1)S(=O)(=O)Nc2ccc(Cl)cc2C(=O)c3ccn(=O)cc3
1410	CHEMBL2398085	test	6.0	14.560999984989786	21.663958810068753	1.6244369745254517	4.862260260090383	10.677914007418593	CC(C)NS(=O)(=O)c1ccc(nc1)c2c(C#N)c3ccc(OC(F)(F)F)cc3n2C4CCC4
1411	CHEMBL2012946	train	6.0	20.52838903204685	11.808333333333335	22.984176635742188	10.887702482199618	16.552150370830496	Cc1cccc2nc(C)n(c3ccc(s3)C(=O)NC4CC4)c12
1412	CHEMBL2393170	train	6.0	52.01908177116095	25.717102729729767	70.03375244140625	22.63986647764974	42.60245085498668	CCN1CC[C@@H](NS(=O)(=O)c2ccc(NC(=O)NCc3cccnc3)cc2)[C@@H](F)C1
1413	CHEMBL2393182	train	6.0	16.265343617636344	10.0	9.157747268676758	16.51801110511063	12.985275497855934	Clc1ccc(CNC(=O)Nc2ccc(cc2)S(=O)(=O)c3ccccc3)cn1
1414	CHEMBL378309	test	6.0	27.687194710091894	22.0	25.699796676635742	23.57068812379918	24.739419877631704	CN[C@@H]1CCN(C1)c2ccc(cn2)N3N=Cc4cc(ccc4C3=O)c5ccc(cc5)C(F)(F)F
1415	CHEMBL2178237	train	6.0	65.67415586947725	27.336190476190477	76.56419372558594	87.6519514713124	64.30662288564152	CN1C[C@@H]([C@H](C1)c2ccc(\C=C\C(=O)Nc3ccccc3N)cc2)C(=O)Nc4ccc(cc4)C(F)(F)F
1416	CHEMBL2178239	train	6.0	7.827777654884138	8.201403508771918	26.927112579345703	30.484495463935524	18.36019730173432	CN1C[C@@H]([C@H](C1)c2ccc(\C=C\C(=O)Nc3ccccc3N)cc2)C(=O)Nc4cccc(F)c4
1417	CHEMBL2177586	test	6.0	10.254882747131283	17.75512820512821	14.311556816101074	4.999578844287641	11.830286653162052	CN1C[C@@H]([C@H](C1)c2ccc(\C=C\C(=O)Nc3ccccc3N)cn2)C(=O)Nc4ccc(Cl)cc4
1418	CHEMBL2017281	train	6.0	50.732233310143585	19.37188721804513	34.4100456237793	-1.8308068913828006	25.6708398151463	COc1cc2c(Nc3cccc4cccnc34)c(cnc2cc1c5c(C)onc5C)C(=O)N
1419	CHEMBL2414533	train	6.0	29.83445952119684	21.54468668246443	34.59042739868164	18.271240493931504	26.0602035240686	COc1ccc(cc1)c2cccn3nc(Nc4ccc(cc4)C(=O)O)nc23
1420	CHEMBL2178222	train	6.0	54.71145190476189	27.0	49.25838851928711	106.52273175488278	59.37314304473294	COCCN1C[C@@H]([C@H](C1)c2ccc(\C=C\C(=O)Nc3ccccc3N)cc2)C(=O)Nc4ccc(Cl)cc4
1421	CHEMBL3355472	train	6.0	63.882570102348375	21.0	40.545467376708984	29.503709629880536	38.73293677723448	CS(=O)(=O)Cn1cnc2c(nc(cc12)c3cccc4[nH]ccc34)N5CCOCC5
1422	CHEMBL2419519	train	6.0	25.747237222517242	11.933250000000001	42.42216491699219	37.77017785165397	29.46820749779085	FC1(F)CCC(CC1)S(=O)(=O)c2ccc(CNC(=O)N3Cc4ccncc4C3)cc2
1423	CHEMBL3265331	train	6.0	64.83820393403458	21.0	41.096656799316406	78.95033427227281	51.47129875140595	NC1=N[C@]2(CO1)[C@@H]3CCOC[C@H]3Oc4ccc(cc24)c5cccnc5F
1424	CHEMBL3127522	train	6.0	24.128155909290335	9.825131639722864	15.531482696533203	19.873811798874247	17.33964551110516	Nc1ccc(cn1)[C@@H]2C[C@H]2C(=O)Nc3ccc(cc3)S(=O)(=O)c4ccccc4
1425	CHEMBL2419516	train	6.0	18.734964825485495	16.342881526104446	12.749091148376465	26.062840300062213	18.472444450007153	Nc1ccc(cn1)S(=O)(=O)c2ccc(CNC(=O)N3Cc4ccncc4C3)cc2
1426	CHEMBL3623136	test	6.0	34.76621691504432	10.455172413793104	19.996871948242188	7.114623571307914	18.08322121209688	Nc1ncc(C(=O)N[C@@H]2C[C@H](O)C2)c3ccc(nc13)c4cccc(F)c4
1427	CHEMBL2419520	train	6.0	15.050855700859685	19.771428571428572	10.338314056396484	22.167980232124542	16.832144640202323	O=C(NCc1ccc(cc1)S(=O)(=O)C2CCOCC2)N3Cc4ccncc4C3
1428	CHEMBL2419536	train	6.0	34.949713559122685	19.57840909090909	15.086684226989746	-1.9812284775953148	16.908394599856553	O=C(NCc1ccc(cc1)S(=O)(=O)N2CCC(CC2)N3CCCC3)N4Cc5ccncc5C4
1429	CHEMBL2393165	train	6.0	36.92422949422305	19.0	18.52745819091797	37.723127818901155	28.043703876010547	O=C(NCc1cccnc1)Nc2ccc(cc2)S(=O)(=O)N3CCCNCC3
1430	CHEMBL2391567	test	6.0	19.338176866872843	23.0	15.697193145751953	1.536054364062478	14.892856094171819	O=C(NCc1cccnc1)Nc2ccc(cc2)S(=O)(=O)N3CCOCC3
1431	CHEMBL2393188	train	6.0	11.340790714651064	17.316605940594076	3.8608145713806152	10.331958608020095	10.712542458661462	O=C(NCc1cncnc1)Nc2ccc(cc2)S(=O)(=O)c3ccccc3
1432	CHEMBL3127514	train	6.0	29.51236035992361	22.0	24.269954681396484	53.704211482327956	32.37163163091201	O=S(=O)(c1ccccc1)c2ccc(CNC3=NS(=O)(=O)c4cnccc4N3)cc2
1433	CHEMBL2158815	train	6.0	58.77106617641444	21.0	75.35407257080078	139.94364742302503	73.76719654256007	OC(=O)C(N1CCC(CC1)N2CCC(CC2)Oc3ccc(Cl)c(Cl)c3)c4ccccc4
1434	CHEMBL2419529	train	6.0	16.8276047735332	16.616758756906073	4.939471244812012	11.311969128978456	12.423950976057435	OC1CCN(CC1)S(=O)(=O)c2ccc(CNC(=O)N3Cc4ccncc4C3)cc2
1435	CHEMBL2037496	test	6.0	38.99545850516245	23.30388429752066	38.84129333496094	32.84593281622356	33.496642238466904	CN(C)C(=O)[C@H](N1[C@H](CC(C)(C)C)C(=O)N[C@H](C2Cc3ccccc3C2)C1=O)c4ccc(C)nc4
1436	CHEMBL237579	test	6.0	22.277539692141193	8.371428571428572	9.752791404724121	-5.091881211804227	8.827469614122414	CC1(OC(=NC1=O)NC2CCCCCCC2)C(F)(F)F
1437	CHEMBL237106	train	6.0	55.46625507575755	17.5	66.05548095703125	73.12424727732176	53.03649582752764	CCC1(CC)OC(=NC1=O)N[C@@H](C)c2ccccc2C(F)(F)F
1438	CHEMBL235017	train	6.0	46.92159427062938	19.0	33.24168395996094	83.33354402025675	45.624205562711765	O=C1N=C(NC23CC4CC(CC(C4)C2)C3)OC15CCOCC5
1439	CHEMBL1097170	test	6.0	49.55163815069114	25.0	67.37197875976562	56.871315719048404	49.69873315737629	Cc1cc[n+]([O-])c(C)c1C(=O)N2C[C@H]3CN(CC[C@H](NC(=O)C4CCCC4)c5ccccc5)C[C@H]3C2
1440	CHEMBL498383	train	6.0	50.48775334464306	28.0	70.52893829345703	72.04938086705806	55.26651812628954	Cc1nn(c(c1-c1ccc2c(c1)N(CCO2)c1nc2c(s1)C(=O)NC(C)(C)C2)C)CC(C)(C)O
1441	CHEMBL258477	train	6.0	5.304307400794885	10.0	12.283552169799805	2.7025514478650194	7.572602754614927	OC(=O)CN1C(=O)C2(CC(=O)N(Cc3cc(F)ccc3F)C2=O)c4cc(Cl)ccc14
1442	CHEMBL205078	test	6.03	100.97594292398863	28.0	109.78389739990234	77.48327608821755	79.06077910302713	Fc1ccc(Nc2cc(ccn2)c3ccnc(NC(=O)C4CCOCC4)c3)cc1
1443	CHEMBL4084358	train	6.1	94.27841010669452	27.0	45.711448669433594	60.33561405570522	56.831368207958334	Clc1ccc(CN2C(=O)n3ncnc3c4c5CCN(Cc5sc24)C6COC6)cc1
1444	CHEMBL3758770	test	6.1	88.450500897902	25.038489065420567	72.76335144042969	124.0054023044675	77.56443592705494	COc1cc(ccc1c2cc3c(N[C@H](C)c4ccccc4)ncnc3s2)C(=O)NCCN(C)C
1445	CHEMBL2181502	train	6.1	14.122984836889934	17.56918660287084	10.998363494873047	0.555215326178798	10.811437565203153	COc1ccc(cn1)c2cc(cnc2N)c3ccc(cc3)C(F)(F)F
1446	CHEMBL2441577	test	6.1	24.25367132361428	7.428355555555562	41.57316589355469	-12.333063659547308	15.230532278294305	Nc1occ(n1)C(=O)N2N=C3CCCC[C@@H]3[C@@]2(O)C(F)(F)F
1447	CHEMBL2143829	train	6.1	18.123024553483305	21.900000000000002	12.52390193939209	18.11275388348317	17.66492009408964	COc1cc2ncnc(c2cc1OC)n3nc(nc3N)c4ccccn4
1448	CHEMBL1835888	test	6.1	60.06164238482289	20.85157142857143	74.98150634765625	56.92062887127367	53.20383725808106	Fc1cc(F)cc(NC(=O)CN(C2CCCCC2)C(=O)c3ccc(cc3)n4ccnc4)c1
1449	CHEMBL46	train	6.13	40.687869714519145	15.740170909090907	35.38755416870117	45.86250624514638	34.419525259364406	Cc1nccn1CC2CCc3c(C2=O)c4ccccc4n3C
1450	CHEMBL318021	train	6.17	55.43330730618403	27.0	35.208194732666016	36.486274757765834	38.53194419915397	CC(CCc1cccc(OCc2ccc3ccccc3n2)c1)CC(=O)O
1451	CHEMBL256668	train	6.18	13.48816374918343	9.212121212121213	8.718345642089844	12.571199479455936	10.997457520712606	C[C@H](CO)Nc1nc(SCc2cccc(F)c2F)nc3NC(=O)C=Nc13
1452	CHEMBL3775940	train	6.2	33.64929117349036	10.0	43.45142364501953	39.602049411145735	31.675691057413907	COc1cc2ncnc(Nc3c(C)c(O)ccc3F)c2cc1OC
1453	CHEMBL522325	train	6.2	49.52807712550608	9.0	38.49321365356445	87.67205168648047	46.17333561638775	Cc1cc(Nc2ccc(C#N)c(c2)C(F)(F)F)n3ncnc3n1
1454	CHEMBL3236386	train	6.3	93.7671018740715	23.472105263157893	88.05043029785156	59.232454481076914	66.13052297903947	CN[C@@H](C)C(=O)N[C@H]1CCC[C@H]2C[C@H]3CCN(C[C@H]3N2C1=O)C(=O)Oc4ccccc4
1455	CHEMBL4088284	train	6.3	38.84167135116022	18.930590027700852	33.45439147949219	47.56829856643272	34.698737856196495	COCCN1[C@H](C)Cc2[nH]c(cc2C1=O)c3ccnc(Nc4ccnn4C)n3
1456	CHEMBL550175	train	6.31	35.65599707507706	18.959090909090907	39.41426467895508	39.90885930872227	33.484552992961326	C[C@@H]1CN(CCN1S(=O)(=O)c2ccc(cc2Cl)C(=O)N)c3ccc(F)cc3C(F)(F)F
1457	CHEMBL782	train	6.31	106.21887994871796	8.355	79.30340576171875	90.51136764166138	71.09716333802452	CCCCNC(=O)NS(=O)(=O)c1ccc(C)cc1
1458	CHEMBL35	train	6.31	32.64917980682894	19.5	14.972947120666504	30.004464050081	24.28164774439411	NS(=O)(=O)c1cc(C(=O)O)c(NCc2occc2)cc1Cl
1459	CHEMBL2017259	train	6.31	108.20213952380954	61.39999999999999	79.75267028808594	153.35873138666446	100.67838529963998	O=C(Nc1ccc(nc1)n2ccnc2)c3ccc(cc3)C#N
1460	CHEMBL1689110	train	6.33	39.10492789811976	20.0	13.753642082214355	11.801538855817247	21.16502720903784	OC(=O)COc1ccc(cc1CN2CCN(CC2)S(=O)(=O)c3ccccc3)C(F)(F)F
1461	CHEMBL244277	train	6.4	106.86678415857997	21.0	60.5512580871582	65.98537093043052	63.600853294042174	Cc1oc(nc1)c2ccc3CCN(CCCSc4nnc(c5cccn5C)n4C)CCc3c2
1462	CHEMBL1784342	test	6.5	42.34806368900636	24.55	21.999929428100586	23.524490744647547	28.105620965438625	Cc1onc(C)c1CCC2CCN(CC2)S(=O)(=O)CC3(CCN(CC3)S(=O)(=O)C)N(O)C=O
1463	CHEMBL382435	train	6.5	17.920001271182528	21.939999999999994	7.053077697753906	16.202441197626033	15.778880041640615	CCN(C1CCN(CC[C@H](c2ccc(cc2)S(=O)(=O)C)c3cc(F)cc(Cl)c3)CC1)C(=O)Cc4ccc(cc4)S(=O)(=O)C
1464	CHEMBL3236381	train	6.5	92.71360523362382	21.564444444444444	85.22023010253906	85.13244419468842	71.15768099382393	CN[C@@H](C)C(=O)N[C@H]1CCC[C@H]2C[C@H]3CCN(C[C@H]3N2C1=O)C(=O)Cc4ccccc4
1465	CHEMBL3601554	train	6.5	40.396401879238326	22.6	57.88337707519531	6.453050143267611	31.833207274425316	CCC(CC)Nc1ncnc2c(OC)c(OC)c(OC)cc12
1466	CHEMBL3298889	train	6.5	44.23495740385251	16.871185922746776	37.310707092285156	13.230740907297632	27.91189783154552	NC[C@@H](NC(=O)C[C@H]1CNC(=O)c2cc(cn12)c3ccnc(F)c3)c4ccccc4
1467	CHEMBL238146	test	6.5	48.22501141880248	23.0	29.85741424560547	16.058874387366444	29.2853250129436	CCc1cccc(C)c1CNc2cc(cn3c(C)c(C)nc23)C(=O)N
1468	CHEMBL1860389	train	6.5	85.06254640148337	17.409375	102.35107421875	82.48266723688563	71.82641571427975	O\N=C(/Nc1ccccc1)\c2ccccc2c3ccccc3
1469	CHEMBL4065588	test	6.6	55.5471094276115	21.0	8.595070838928223	45.40160088356396	32.63594528752592	Cc1cc([C@H]2CN(CC(F)(F)C2)C(=O)c3ccc(F)c(Br)c3)n4ncnc4n1
1470	CHEMBL3236081	test	6.6	25.75832762606286	17.0	33.32301330566406	44.675099670865606	30.189110150648133	CN[C@@H](C)C(=O)N[C@H]1CCC[C@H]2C[C@H]3CCN(CCc4ccc(Cl)cc4)C[C@H]3N2C1=O
1471	CHEMBL2011777	test	6.6	35.31464488882355	13.615820895522402	18.799585342407227	51.186981409817534	29.72925813414268	CC1(C)C[C@H](O)C[C@](C)(CNc2cccc(c2)S(=O)(=O)N)C1
1472	CHEMBL2402734	train	6.6	38.37097547247547	27.0	27.252487182617188	37.4423034628844	32.51644152949426	COc1cc(NC(=O)[C@@H]2N[C@@H](CC(C)(C)C)[C@@](C#N)([C@H]2c3cccc(Cl)c3F)c4ccc(Cl)cc4F)ccc1C(=O)O
1473	CHEMBL2403317	test	6.6	46.41034754785935	20.0	57.87701416015625	91.12115774499557	53.85212986325279	COc1ccnc(Oc2ccc3N(Cc4c(F)cc(F)cc4F)C=NC(=O)c3c2)c1C(F)(F)F
1474	CHEMBL1241548	train	6.6	41.19588469031026	15.633689839572229	0.3804876208305359	87.33344495389899	36.135876776153005	Cc1ccc2c(cccc2n1)N3CCN(CCc4cccc5c4OCc6nc(C)c(C)n56)CC3
1475	CHEMBL1078595	train	6.6	56.6441597359731	19.98169014084507	41.495975494384766	13.972484051959015	33.023577355790486	O=S(=O)(Nc1ccc2CCN(Cc3cc[nH]n3)CCc2c1)c4ccc(nc4)N5CCOCC5
1476	CHEMBL1340633	train	6.61	67.11105412068089	33.0	57.84381866455078	58.889844106444535	54.21117922291905	COc1cc(ccc1Nc2ccccc2C(=O)O)c3ccc(Nc4ccccc4C(=O)O)c(OC)c3
1477	CHEMBL206229	train	6.67	100.54002253959482	61.04210526315789	100.8560562133789	66.72016416627159	82.2895870456008	CC(C)CN1C(=O)N(C)C(=O)c2c(SC(C)C)c(Cc3ccccc3C(F)(F)F)sc12
1478	CHEMBL3236387	train	6.7	161.83688445559827	19.26378723404253	185.39422607421875	161.1131732082668	131.9020177430316	CN[C@@H](C)C(=O)N[C@H]1CCC[C@H]2C[C@H]3CCN(C[C@H]3N2C1=O)C(=O)Nc4ccccc4
1479	CHEMBL4095097	train	6.7	63.769670997150534	32.6	62.616737365722656	100.02913790403277	64.7538865667265	COc1ccc(CN2C(=O)n3ncnc3c4c2sc5CN(CC6CCOCC6)CC(F)(F)c45)cc1
1480	CHEMBL1956294	test	6.7	8.2080657343498	14.348455197368423	7.762027740478516	8.56221655032085	9.720191305629397	COCc1nc2nc(C)cc(Nc3ccc(cc3)C(F)(F)F)n2n1
1481	CHEMBL2178259	test	6.7	37.53100591960344	17.0	71.9569320678711	30.124814098417534	39.15318802147302	CC(C)n1cc(NC(=O)c2cnn3cccnc23)c(n1)c4cccc(Cl)c4
1482	CHEMBL3297761	train	6.7	11.863582518876765	25.0	6.361881732940674	9.955264172470292	13.295182106071934	CN1CCN(C[C@@H](NC(=O)C[C@H]2CNC(=O)c3cc(cn23)c4cccc(F)c4)C5CCCCC5)CC1
1483	CHEMBL2070946	train	6.76	36.03080153639128	18.0	21.79477310180664	-4.959346661776826	17.716556994105275	O=C(NC1(CC1)C#N)[C@@H]2CCCC[C@H]2C(=O)N3CCN(CC3)c4ncc(C#N)s4
1484	CHEMBL3236078	test	6.8	17.68857480370631	19.221384615384622	2.2876555919647217	-10.920384544765781	7.069307616572468	CN[C@@H](C)C(=O)N[C@H]1CCC[C@H]2C[C@H]3CCN(CCc4ccccc4C)C[C@H]3N2C1=O
1485	CHEMBL3127128	train	6.8	61.79689583333333	25.0	86.20724487304688	80.93201360933054	63.48403857892769	NC1=NC(=CC(=O)N1)c2ccc(OCCCCO)cc2
1486	CHEMBL559478	train	6.8	51.83558116914683	25.0	36.36018753051758	132.0137600506946	61.30238218758975	Brc1ccc(OC(=O)N2CCN3CCC2CC3)cc1
1487	CHEMBL465948	train	6.8	66.0870559885456	28.400719999999993	111.77530670166016	39.82863573964084	61.52292960746165	C[C@@H]1CN(Cc2ccc(cc2)c3ccccc3CN(C)C(=O)CS(=O)(=O)c4ccccc4)C[C@H](C)N1
1488	CHEMBL1683447	train	6.9	74.63072411543565	54.0	86.92524719238281	90.68187445070629	76.55946143963119	C[C@@H](C[C@@](C)(CS(=O)(=O)N1CCC(CCc2ccc(Cl)cc2Cl)CC1)N(O)C=O)c3ncc(F)cn3
1489	CHEMBL3127127	test	6.9	23.055360818181825	10.0	11.837839126586914	12.637864210363535	14.382766038783068	CC(C)(C)COc1ccc(cc1)C2=CC(=O)NC(=N2)N
1490	CHEMBL3236079	train	6.9	36.40815182844591	17.5	16.7946720123291	24.14721292685106	23.71250919190652	CN[C@@H](C)C(=O)N[C@H]1CCC[C@H]2C[C@H]3CCN(CCc4cccc(C)c4)C[C@H]3N2C1=O
1491	CHEMBL1080982	train	6.9	49.92434961202814	22.0	41.312294006347656	53.61749956487119	41.713535795811744	Cc1cccc(C)c1CNc2nc(cc3c(C)c(C)n(CCO)c23)N4CCOCC4=O
1492	CHEMBL2382405	train	6.9	52.05809032584531	29.0	43.05668258666992	6.630652065183605	32.68635624442471	CCC(SC1=NC(=C(C#N)C(=O)N1)c2cccc(OC)c2)C(=O)Nc3ccc(cc3)S(=O)(=O)N
1493	CHEMBL1271644	train	6.9	30.085550986151258	25.0	60.59315490722656	52.591974459404845	42.06767008819567	Cn1nc(C(=O)N)c2CCc3cnc(Nc4cc(ccc4OC(F)(F)F)N5CCNCC5)nc3c12
1494	CHEMBL4073812	train	6.9	37.293116049483814	20.0	39.37510681152344	56.82071189735235	38.372233689589905	CNC(=O)c1c[nH]c2cnc(cc12)N3CCCc4cc(c5cnn(C)c5)c(cc34)C(F)F
1495	CHEMBL1649669	train	6.9	71.479465439121	24.9	73.3587875366211	40.21110077001279	52.48733843643872	Fc1cc(ccc1CC(=O)N2CCCC2)n3nc(c4CCCCc34)C(F)(F)F
1496	CHEMBL1290004	train	6.9	78.68105289250813	33.6	127.0096435546875	55.16370051125995	73.6135992396139	O=C(N1CCCCC1)c2ccccc2N3Cn4c(ccc4c5ccccc5)C3=O
1497	CHEMBL2070938	train	6.91	38.6687992835956	19.0	34.49386215209961	28.389552843402367	30.138053569774396	O=C(NC1(CC1)C#N)[C@@H]2CCCC[C@H]2C(=O)N3CCN(CC3)c4nccs4
1498	CHEMBL1214	test	6.92	59.975714715919466	37.916666666666664	63.99638366699219	49.12606171941531	52.75370669224841	CC1(C)S[C@@H]2[C@H](NC(=O)C(C(=O)O)c3ccccc3)C(=O)N2[C@H]1C(=O)O
1499	CHEMBL1088752	train	6.92	42.89268106254856	22.0	45.152305603027344	8.904908395741739	29.737473765329412	Cc1c(F)cc(cc1c2ccc(cn2)C(=O)NCC(C)(C)C)C(=O)NC3CC3
1500	CHEMBL1770373	train	7.0	64.82704004329004	9.0	58.01405715942383	5.282166039533222	34.28081581056177	C(c1ccccc1)c2ncc3CCNCCc3n2
1501	CHEMBL4071302	train	7.0	8.711671752573345	8.5	-2.5767569541931152	-6.976056556249158	1.914714560532768	C(CC1CCNCC1)Oc2ccc(cc2)[C@@H]3CC[C@@]4(CC3)OOC5(O4)C6CC7CC(CC5C7)C6
1502	CHEMBL4063456	train	7.0	25.630811562750583	15.132509505703434	15.533488273620605	31.23960572349182	21.88410376639161	C(CN1CCC1)Oc2ccc(cc2)[C@@H]3CC[C@@]4(CC3)OOC5(O4)C6CC7CC(CC5C7)C6
1503	CHEMBL4085085	train	7.0	66.85614584150353	7.192113035714286	59.96757888793945	64.53865871059693	49.63862411893855	C(CN1CCCC1)Oc2ccc(cc2)[C@@H]3CC[C@@]4(CC3)OOC5(O4)C6CC7CC(CC5C7)C6
1504	CHEMBL4072076	train	7.0	29.753458876479517	17.0	29.96435546875	62.10825397756408	34.7065170806984	C(CN1CCNCC1)Oc2ccc(cc2)[C@@H]3CC[C@@]4(CC3)OOC5(O4)C6CC7CC(CC5C7)C6
1505	CHEMBL4099838	train	7.0	29.795957849574332	18.0	1.3906444311141968	35.99600049662055	21.29565069432727	C(COc1ccc(cc1)[C@@H]2CC[C@@]3(CC2)OOC4(O3)C5CC6CC(CC4C6)C5)OC7CCNCC7
1506	CHEMBL4070246	train	7.0	23.350705385013057	22.600000000000012	70.4536361694336	-5.8143250803656175	27.64750411852026	C(Oc1ccc(cc1)[C@@H]2CC[C@@]3(CC2)OOC4(O3)C5CC6CC(CC4C6)C5)C7CCNCC7
1507	CHEMBL3605454	train	7.0	67.4646332649749	57.559230769230766	107.4773178100586	114.4698634823385	86.74276133165068	C[C@H](C1CCN(C)CC1)n2c(C)c(C(=O)NCC3=C(C)C=C(C)NC3=O)c4ccccc24
1508	CHEMBL1934422	train	7.0	31.54738712835956	21.0	6.101864814758301	15.633380521682012	18.57065811619997	C[C@H](NC(=O)c1c(C)nn(C2CCOCC2)c1NS(=O)(=O)c3ccc(C)cc3)C(C)(C)C
1509	CHEMBL1689129	train	7.0	19.428032401115782	13.753099236641225	10.875387191772461	8.987359063726677	13.260969473314036	C[C@H]1CN(Cc2cc(Cl)ccc2OCC(=O)O)CCN1C(=O)Cc3ccccc3Cl
1510	CHEMBL1221702	train	7.0	40.222266666666656	30.0	42.11415481567383	23.369754949671353	33.92654410800296	C[C@H]1CN=C(N)c2sccc2O1
1511	CHEMBL466296	train	7.0	67.8651	20.0	47.1380500793457	57.649439912454966	48.16314749795016	C1Cc2nc[nH]c2CC1c3ccccc3
1512	CHEMBL1916238	train	7.0	12.99883113859649	8.0	25.26270294189453	45.08318261217765	22.836179173167167	CC(=O)N[C@@H]1C(C)(C)[C@@H](Oc2ccc(C#N)c(C)c2)C1(C)C
1513	CHEMBL1916236	train	7.0	45.43093503901895	17.5	52.87177658081055	54.28548438625568	42.522049001521296	CC(=O)N[C@@H]1C(C)(C)[C@@H](Oc2ccc(C#N)c(c2)C#N)C1(C)C
1514	CHEMBL252258	train	7.0	54.099407799042616	28.984615384615385	53.67850112915039	43.937455727736484	45.17499501013622	CC(=O)N1C2CCCC1C=C(CN3C4CCC3CC(C4)NC(=O)Nc5cc(F)cc(c5)C(F)(F)F)C2
1515	CHEMBL1800166	test	7.0	71.83590353896102	23.6	52.1153450012207	59.02817726547194	51.64485645141342	CC(C)(C)Cc1nc2cc(ccc2n1CC3CC3)S(=O)(=O)C(C)(C)CO
1516	CHEMBL1800165	train	7.0	89.45650238095239	55.7	122.42501068115234	78.6501564598129	86.55791738047941	CC(C)(C)Cc1nc2cc(ccc2n1CC3CC3)S(=O)(=O)CC(C)(C)O
1517	CHEMBL2337981	train	7.0	53.034220000000005	29.0	35.51417541503906	41.34097434739061	39.72234244060742	CC(C)(C)NC(=O)NCCN1CCC(CO)(CNC(=O)c2cc(Cl)cc(Cl)c2)CC1
1518	CHEMBL4093865	train	7.0	38.79232888376597	20.0	39.817928314208984	19.333350843434868	29.485902010352458	CC(C)(CN)Oc1ccc(cc1)[C@@H]2CC[C@@]3(CC2)OOC4(O3)C5CC6CC(CC4C6)C5
1519	CHEMBL4066300	train	7.0	19.37533524883281	18.0	15.339377403259277	-4.630709668016487	12.0210007460189	CC(C)(N)CCOc1ccc(cc1)[C@@H]2CC[C@@]3(CC2)OOC4(O3)C5CC6CC(CC4C6)C5
1520	CHEMBL1782375	train	7.0	50.964678576006236	34.194444444444436	34.152122497558594	47.117420843820696	41.60716659045749	CC(C)[C@@]1(CC[C@H](C1)N2CCC3COCCC23)C(=O)N4CCN(CC4)c5cc(ccn5)C(F)(F)F
1521	CHEMBL3221826	train	7.0	18.122829976037163	11.958100069930067	13.918295860290527	24.449981937246385	17.112301960876035	CC(C)c1cc2N(Cc3ccccc3)C(=O)Nc2c(N)n1
1522	CHEMBL1078169	train	7.0	58.56537003170704	30.0	61.79075241088867	27.16843335957676	44.38113895054312	CC(C)CN([C@H]1CCNC1)C(=O)c2ccccc2C(C)C
1523	CHEMBL558651	train	7.0	24.789390085072174	20.780909090909088	23.45805549621582	5.725138496500585	18.68837329217442	CC(C)CN([C@H]1CCNC1)C(=O)c2ccccc2Oc3ccccc3
1524	CHEMBL383696	train	7.0	91.76136122923513	55.0	151.78414916992188	80.37393856166887	94.72986224020647	CC(C)CN1C(=O)N(C)C(=O)c2c(SC3CCCC3)c(Cc4ccccc4C(F)(F)F)sc12
1525	CHEMBL1258079	train	7.0	59.91160480161502	19.0	41.538818359375	50.68809225414361	42.78462885378341	CC(C)N1CCC(CC1)Oc2cc3cc4C(=O)N(CC5CC5)C[C@H](C)n4c3cc2Br
1526	CHEMBL1257729	train	7.0	24.93122238654408	15.740170909090907	34.03831481933594	2.6463741789650683	19.339020573484	CC(C)N1CCC(CC1)Oc2ccc3c(c2)cc4C(=O)N[C@H](C)Cn34
1527	CHEMBL3408523	train	7.0	41.397606299172764	36.65	37.12214660644531	-7.900734948436836	26.817254489295312	CC1=CSC(OCC(F)(F)F)(C2=NOC(=O)N12)c3ccc(Br)cc3
1528	CHEMBL3221820	train	7.0	42.96957634333471	18.65	27.901628494262695	1.5781373707802828	22.77483555209442	Cc1cc(N)c2NC(=O)N(Cc3ccccc3)c2n1
1529	CHEMBL3221817	train	7.0	42.96957634333471	18.65	26.780424118041992	1.5781373707802828	22.494534458039244	Cc1cc2N(Cc3ccccc3)C(=O)Nc2c(N)n1
1530	CHEMBL1760437	train	7.0	12.491780597573374	8.0	7.988009929656982	1.0975614288835007	7.394337989028465	Cc1ccc(CN2C(=O)Nc3c(N)nc(cc23)C(F)(F)F)cn1
1531	CHEMBL1760580	train	7.0	42.31147674009449	16.17367864942521	30.614782333374023	37.211062637696386	31.57775009014753	Cc1ccc(CN2C(=O)Nc3c(N)nc(cc23)c4occn4)cn1
1532	CHEMBL184012	test	7.0	34.44214156721998	30.33	39.278602600097656	17.239200521202687	30.32248617213008	Cc1ccc(NC(=O)c2ccnc(c2)N3CCOCC3)cc1NC(=O)c4ccc(OCc5ccccn5)cc4
1533	CHEMBL378730	test	7.0	53.56995680288599	12.759533799533804	93.24771881103516	66.40175401648895	56.49474085748598	Cc1ccc2c(c1)c(c(C)n2CC(=O)O)c3ccnc4c(Cl)cccc34
1534	CHEMBL1917446	train	7.0	53.480541857528635	19.331570247933875	29.667116165161133	2.3799712100527226	26.21479987016909	Cc1ccc2c(c1)c(c(C)n2CC(=O)O)S(=O)(=O)c3ccc(Cl)cc3
1535	CHEMBL1760444	train	7.0	10.417469953013107	17.86846153846154	8.407092094421387	8.471931180773423	11.291238691667363	Cc1nc(CN2C(=O)Nc3c(N)nc(cc23)C(F)(F)F)cs1
1536	CHEMBL3221818	train	7.0	42.05367634333472	18.5	19.40140151977539	3.4266316715348366	20.84542738366124	Cc1nc(N)c2CC(=O)N(Cc3ccccc3)c2n1
1537	CHEMBL3221819	test	7.0	18.04877653065521	19.0	18.916412353515625	22.40500370593832	19.59254814752729	Cc1nc(N)c2NC(=O)N(Cc3ccccc3)c2c1C
1538	CHEMBL150245	train	7.0	44.97603085313864	19.0	2.3814616203308105	8.967195151341999	18.83117190620286	Cc1nc(N)c2nc(O)n(Cc3ccccc3)c2n1
1539	CHEMBL2376312	train	7.0	35.81884255569375	21.0	16.072296142578125	15.543771360238233	22.108727514627528	CCC1(C)NC(=O)c2cc(ccc2N(C)C1=O)S(=O)(=O)Nc3ccc(Cl)cc3
1540	CHEMBL3814799	train	7.0	135.8970708333333	31.0	142.8251495361328	157.51743052897754	116.80991272461091	CCCc1cc(ccc1Oc2ccc(C(=O)CN3C(=O)NC(C)(C3=O)c4ccc(OC(C)C)cn4)c(O)c2)C(O)(C(F)(F)F)C(F)(F)F
1541	CHEMBL1080069	train	7.0	30.052646363636356	22.600000000000012	21.31395721435547	26.729311988123712	25.173978891528886	CCCN([C@H]1CCNC1)C(=O)c2cccc(Cl)c2Cl
1542	CHEMBL563117	test	7.0	48.271943985240426	16.92070707070707	12.60560417175293	8.467789541456265	21.566511192289173	CCN([C@H]1CCNC1)C(=O)c2ccccc2Oc3ccccc3
1543	CHEMBL478834	test	7.0	80.98918585428257	25.0	46.29282760620117	86.94825249666732	59.807566489287765	CCOC(=O)N(Cc1ccccc1c2ccccc2)[C@H]3CCNC3
1544	CHEMBL551471	train	7.0	18.31336474124621	10.0	17.00345802307129	0.6047581574411793	11.48039523043967	CCOc1ccccc1C(=O)N(CC2CCC2)[C@H]3CCNC3
1545	CHEMBL1956472	train	7.0	28.61086180786617	17.78	26.837228775024414	27.958444789545414	25.296633843109	CCOc1nc2nc(C)cc(Nc3ccc(cc3)C(F)(F)F)n2n1
1546	CHEMBL2011124	train	7.0	35.73927370641342	25.0	25.466615676879883	31.172459882686457	29.34458731649494	CCOc1ncc(cc1F)[C@@H](C)Nc2nc(nc3C(=O)N(Cc23)C(C)C)N4CCN(CC4)C(=O)C
1547	CHEMBL1800179	train	7.0	64.9224553030303	26.0	100.56977081298828	60.13643313190618	62.90716481198119	CCS(=O)(=O)c1ccc2c(c1)nc(n2CCOC(F)(F)F)C(C)(C)C
1548	CHEMBL4075337	train	7.0	10.951400568654298	10.0	10.523529052734375	12.446513422447374	10.980360760959012	Cl.Cl.CN1CCC(CC1)Nc2nc(Nc3ccc(F)c(Cl)c3)nc4ccccc24
1549	CHEMBL4069899	train	7.0	91.28951544991982	25.60438144329895	23.958890914916992	-1.2957753804933398	34.8892531069106	Cl.Cl.CN1CCN(CCNc2nc(Nc3ccc(F)c(Cl)c3)nc4ccccc24)CC1
1550	CHEMBL3114828	train	7.0	60.171192783901645	28.7	38.33607864379883	15.410139200353848	35.65435265701358	Cl.Cn1cc(CCN)c2C(=O)C3=C(NC=CS3(=O)=O)C(=O)c12
1551	CHEMBL3114829	train	7.0	23.445732110714292	23.101195219123426	0.9403431415557861	64.68642595207638	28.04342410586747	Cl.CNCCc1cn(C)c2C(=O)C3=C(C(=O)c12)S(=O)(=O)C=CN3
1552	CHEMBL1080968	test	7.0	51.67411149404585	21.00826086956522	44.58340072631836	25.788837764805375	35.763652713683705	Clc1cccc(C(=O)N(C2CCCC2)[C@H]3CCNC3)c1Cl
1553	CHEMBL2010850	test	7.0	54.377867108776535	20.0	55.70476531982422	12.23800851574165	35.580160236085604	CN([C@@H]1CCN(Cc2nc3cc(F)ccc3s2)C[C@@H]1F)C(=O)Cc4ccc(cc4)n5cnnn5
1554	CHEMBL1946621	train	7.0	91.79324942456704	33.0	74.93704986572266	118.12859509630901	79.46472359664968	CN(C)C(=O)c1ccc(cc1)C(=C2CCN(Cc3cscn3)CC2)c4ccccn4
1555	CHEMBL3086064	train	7.0	39.00121856989265	22.0	6.121885776519775	23.610114946430706	22.683304823210783	CN(C)C(=O)Oc1cc2OC(=O)C(=C(C)c2cc1Cl)Cc3cccc(NS(=O)(=O)N)c3
1556	CHEMBL256970	train	7.0	69.90607543951064	24.165625000000002	65.5567626953125	60.499711565353955	55.03204367504428	CN(C)Cc1cnc(C)cc1Oc2ccc(Cl)cc2C
1557	CHEMBL1800653	test	7.0	54.00937179122048	29.0	43.06196212768555	20.90355990050013	36.74372345485154	CN(C)CCn1c(CC(C)(C)C)nc2cc(ccc12)S(=O)(=O)CC(C)(C)O
1558	CHEMBL2010836	train	7.0	15.881527320566493	18.0	20.606430053710938	16.703935449411837	17.797973205922318	CN(C1CCN(Cc2ccc(cc2)C(F)(F)F)CC1)C(=O)Cc3ccc(cc3)n4cnnn4
1559	CHEMBL3103192	test	7.0	34.07627423723187	25.0	24.5867919921875	15.91692651103508	24.894998185113614	CN(CCN)c1ccc(Nc2cc(NC3CC3)n4ncc(C#N)c4n2)cc1NC(=O)C
1560	CHEMBL4069295	train	7.0	134.8803464422664	28.0	149.6476593017578	121.16949489433256	108.42437515958919	CN1C(=O)C2=C(N(CC(=O)Nc3ccc(nc3)c4ccccc4)CCC2)C1=O
1561	CHEMBL4104257	train	7.0	99.57591130597496	28.16388888888891	132.22940063476562	57.080747791833126	79.26248715536565	CN1C(=O)C2=C(N(CC(=O)Nc3ccc(nn3)c4cccnc4)CCC2)C1=O
1562	CHEMBL508084	test	7.0	52.97048100924078	20.136363636363637	64.09430694580078	64.79814471734444	50.49982407718741	Cn1cc(cn1)c2ccccc2[C@@H]3Cc4nccn4C3
1563	CHEMBL2031241	test	7.0	44.071075667662114	18.0	26.916322708129883	66.16780354267502	38.788800479616754	CN1CCN(CC1)c2ccc3N=CN(C(=O)c3c2)c4cc(ccc4C)C(=O)Nc5nccs5
1564	CHEMBL2031227	test	7.0	42.5880043589124	27.75	46.96833801269531	61.173904634624826	44.62006175155813	CN1CCN(CC1)c2ccc3N=CN(C(=O)c3c2)c4cc(NC(=O)c5ccc(cc5)C#N)ccc4C
1565	CHEMBL3786768	train	7.0	56.483030318138525	26.0	73.56791687011719	62.479839340352406	54.63269663215203	Cn1nc(cc1c2ccccc2)C(=O)N3CCC(CC3)Oc4ccc(CN5CCCC5)cc4
1566	CHEMBL2181482	test	7.0	22.056304104708733	10.042133598971718	9.632569313049316	32.71864905061836	18.612414016837032	CNC(=O)c1ccc(cc1)c2cnc(N)c(c2)c3ccc(OC)nc3
1567	CHEMBL273208	test	7.0	47.0907124915447	23.49273452722075	47.692405700683594	35.03296987867166	38.32720564953018	CNCc1cnc(C)cc1Oc2ccccc2Oc3ccccc3
1568	CHEMBL3263995	train	7.0	43.152200606678406	23.0	14.550537109375	34.18781997671166	28.722639423191268	CNS(=O)(=O)Nc1cccc(CC2=C(C)c3ccc(OC(=O)N(C)C)cc3OC2=O)n1
1569	CHEMBL1782572	train	7.0	19.627114292914534	29.0	24.046018600463867	36.78414265725221	27.364318887657653	CO[C@@H]1COCC[C@@H]1N[C@@H]2CC[C@](C2)(C(C)C)C(=O)N3CCN(CC3)c4cc(cnn4)C(F)(F)F
1570	CHEMBL1782567	train	7.0	17.684257584517784	28.81794871794872	24.205373764038086	27.129760710641033	24.459335194286407	CO[C@@H]1COCC[C@@H]1N[C@@H]2CC[C@](C2)(C(C)C)C(=O)N3CCN(CC3)c4ccnc(c4)C(F)(F)F
1571	CHEMBL403080	train	7.0	38.28574725	20.0	21.691282272338867	3.8348575354510483	20.95297176444748	COc1cc(Cl)ccc1Oc2cc(C)ncc2CN(C)C
1572	CHEMBL3125036	train	7.0	32.54514195619896	56.0	33.41938781738281	62.82994033143522	46.198617526254246	COc1cc(Oc2ccc(cc2C=C)C(NC(=O)NC(C)(C)C)C(=O)Nc3cccc(c3)C(=O)NS(=O)(=O)c4ccc(cc4)C(F)(F)F)nc(n1)c5ccccc5
1573	CHEMBL4074904	train	7.0	34.59438392219063	18.0	48.826629638671875	75.2817190426622	44.17568315088118	COc1cc2nc(Nc3ccc(F)cc3)nc(NCc4ccccc4)c2cc1OC
1574	CHEMBL1760662	train	7.0	93.2699490842489	23.574999999999996	65.81462860107422	65.6152655842853	62.068710817402106	COc1ccc(cc1Cn2c(cc3cc(ccc23)C#N)C(=O)NCC(C)(C)O)C(F)(F)F
1575	CHEMBL3125005	test	7.0	9.538283888698292	9.4	18.023889541625977	8.542281423845377	11.376113713542413	COc1ccc(cn1)c2cc(ccc2N)c3ccc(cc3)S(=O)(=O)C
1576	CHEMBL2181499	train	7.0	21.747238248757814	9.558080474934052	11.28345012664795	5.4785728132778955	12.016835415904428	COc1ccc(cn1)c2cc(cnc2N)c3ccc(c(F)c3)S(=O)(=O)C
1577	CHEMBL2181479	train	7.0	14.057173693122088	14.320149435215956	1.9106166362762451	24.923274977184896	13.802803685449796	COc1ccc(cn1)c2cc(cnc2N)c3ccc(cc3)C(=O)N
1578	CHEMBL2181486	train	7.0	27.335128426991187	18.0	16.839527130126953	22.2210902220152	21.098936444783334	COc1ccc(cn1)c2cc(cnc2N)c3ccc(cc3)C(=O)N4CCN(C)CC4
1579	CHEMBL2181487	test	7.0	29.41299069171297	14.560400000000005	26.562108993530273	9.2416012259071	19.94427522778759	COc1ccc(cn1)c2cc(cnc2N)c3ccc(cc3)C(=O)N4CCOCC4
1580	CHEMBL2181483	test	7.0	47.50910077709806	19.05	43.52600860595703	17.058771841326983	31.78597030609552	COc1ccc(cn1)c2cc(cnc2N)c3ccc(cc3)C(=O)NCCCO
1581	CHEMBL2181485	train	7.0	65.30484625703967	20.666666666666668	56.534820556640625	74.0008945385615	54.12680700472711	COc1ccc(cn1)c2cc(cnc2N)c3ccc(cc3)C(=O)NCCN4CCCC4
1582	CHEMBL2181478	train	7.0	11.650183970995188	16.17280868167205	6.727581977844238	21.74275706455119	14.073332923765665	COc1ccc(cn1)c2cc(cnc2N)c3ccc(cc3)C(=O)O
1583	CHEMBL2181494	test	7.0	7.898526241564415	9.04	3.7394022941589355	9.100661330389958	7.444647466528327	COc1ccc(cn1)c2cc(cnc2N)c3ccc(cc3)S(=O)(=O)N
1584	CHEMBL2181500	train	7.0	57.3418251839838	23.0	59.08536148071289	21.101525123125967	40.132177946955665	COc1ccc(cn1)c2cc(cnc2N)c3ccc(cc3C(F)(F)F)S(=O)(=O)C
1585	CHEMBL2181498	train	7.0	20.7864115704908	9.593692307692303	17.016319274902344	30.13482205728041	19.382811302591463	COc1ccc(cn1)c2cc(cnc2N)c3ccc(NS(=O)(=O)C)cc3
1586	CHEMBL2181480	train	7.0	21.863352668424277	17.978386342756192	15.729801177978516	21.586183877698037	19.289431016714254	COc1ccc(cn1)c2cc(cnc2N)c3cccc(c3)C(=O)N
1587	CHEMBL3124999	train	7.0	31.337163477607387	8.603053435114504	61.637821197509766	92.76085876128927	48.584724217880236	COc1ccc(cn1)c2cc(cnc2NCCCCN)c3ccc(cc3)S(=O)(=O)C
1588	CHEMBL3124978	train	7.0	9.477719186333378	8.0	9.276161193847656	8.221998496877239	8.743969719264568	COc1ccc(cn1)c2cc(nnc2N)c3ccc(cc3)S(=O)(=O)C
1589	CHEMBL3124979	train	7.0	46.08107466160176	16.934687499999992	12.543180465698242	7.011953789375009	20.642724104168753	COc1ccc(cn1)c2csc3c(cnc(N)c23)c4ccc(cc4)S(=O)(=O)C
1590	CHEMBL2018954	test	7.0	51.611394775861115	24.92	33.519309997558594	27.882933901873013	34.48340966882318	COc1ccc(COc2nc(Br)cnc2NS(=O)(=O)c3ccc(C)cc3)cc1OCCN(C)C
1591	CHEMBL2031224	train	7.0	32.138903050132605	24.0	31.147050857543945	12.619988203982983	24.976485527914882	COc1ccccc1C(=O)Nc2ccc(C)c(c2)N3C=Nc4ccc(cc4C3=O)N5CCN(C)CC5
1592	CHEMBL1537460	train	7.0	65.04745893114602	30.0	61.7448844909668	82.81067589282029	59.90075482873328	COc1ccccc1C(=O)Nc2ccc(Cc3ccncc3)cc2
1593	CHEMBL511577	train	7.0	140.0554700769231	25.990000000000006	160.6537628173828	146.33423166681385	118.25836614027995	COCc1ccccc1C2Cc3nccn3C2
1594	CHEMBL466876	train	7.0	87.1753740703081	21.0	31.116924285888672	129.2264091274182	67.12967687090375	COCc1ccccc1C2CCc3nc[nH]c3C2
1595	CHEMBL2022748	train	7.0	30.475860005847952	23.0	27.738365173339844	33.364861793065465	28.644771743063316	COCCCS(=O)(=O)NC(=O)CCc1ccc(OCCOC)cc1Oc2ncc(cc2Cl)C(F)(F)F
1596	CHEMBL3785094	train	7.0	54.72804285910256	23.66829268292683	40.63587951660156	54.072287663971956	43.27612568065073	COCCOc1cnc2C=CN([C@H](C)c3nnc4ccc(cn34)c5onc(C)c5)C(=O)c2c1
1597	CHEMBL2041991	test	7.0	7.503095175771963	10.0	11.604674339294434	5.955551365982631	8.765830220262258	CS(=O)(=O)c1ccc(cc1)c2cnc(N)c(c2)c3ccc(cc3)C(F)(F)F
1598	CHEMBL2041981	train	7.0	9.83042817588377	8.988235294117647	1.0797680616378784	-5.312433101667971	3.6464996074928315	CS(=O)(=O)c1ccc(cc1)c2cnc(N)c(c2)c3ccc(CO)nc3
1599	CHEMBL2041979	train	7.0	8.06611244982452	8.836363636363636	6.502412796020508	14.696622124065316	9.525377751568495	CS(=O)(=O)c1ccc(cc1)c2cnc(N)c(c2)c3ccc(F)nc3
1600	CHEMBL2041985	train	7.0	27.096107346202107	20.59550295857981	27.318334579467773	12.454874621338519	21.866204876397052	CS(=O)(=O)c1ccc(cc1)c2cnc(N)c(c2)c3cccc(c3)C(F)(F)F
1601	CHEMBL3124980	train	7.0	26.210566451914097	17.937142857142856	27.399141311645508	1.7747473880415954	18.33039950218601	CS(=O)(=O)c1ccc(cc1)c2cnc(N)c(n2)c3ccc(nc3)C(F)(F)F
1602	CHEMBL256982	train	7.0	34.53050612020201	20.99545454545454	2.474245071411133	6.645626320951292	16.161458014504746	CS(=O)(=O)Nc1c(Cl)ccc2C(CCCc12)c3ncc[nH]3
1603	CHEMBL3261920	train	7.0	37.81323248026846	18.979743589743652	27.398134231567383	18.820737526835835	25.752961957103835	CSc1cc(ccc1C#N)c2ccc(C[C@H](NC(=O)[C@@H]3CCCCN3)C#N)cc2
1604	CHEMBL541196	train	7.0	46.51103760232387	22.14390909090907	51.395957946777344	69.4070756395693	47.3644950698949	CSc1ccccc1C(=O)N(C2CCC2)[C@H]3CCNC3
1605	CHEMBL564059	train	7.0	46.03532840736456	24.666666666666668	21.4455509185791	66.28648561725629	39.608507902466656	CSc1ccccc1C(=O)N(CC2CCC2)[C@H]3CCNC3
1606	CHEMBL3221830	test	7.0	31.088367179936082	15.893014396551752	55.40883255004883	36.57502932369706	34.74131086255843	FC(F)(F)c1cc2N(Cc3ccccc3)C(=O)Nc2cn1
1607	CHEMBL562533	train	7.0	34.669444620754184	8.299999999999992	31.222803115844727	18.543569726887885	23.183954365871696	FC(F)(F)c1ccccc1C(=O)N([C@H]2CCNC2)c3ccccc3
1608	CHEMBL560673	train	7.0	41.034301105733014	15.771560283687949	66.91981506347656	69.84445137186593	48.392531956190865	FC(F)(F)c1ccccc1C(=O)N(C2CCC2)[C@H]3CCNC3
1609	CHEMBL552338	test	7.0	20.723242100243507	18.8	6.107294082641602	14.4778601069627	15.027099072461953	FC(F)(F)c1ccccc1C(=O)N(CC2CCC2)[C@H]3CCNC3
1610	CHEMBL564934	train	7.0	42.19921006694787	19.0	45.529029846191406	16.556325935666273	30.82114146220139	FC(F)(F)c1ccccc1C(=O)N(CC2CCCC2)[C@H]3CCNC3
1611	CHEMBL560999	train	7.0	43.87261839276658	24.360313653136533	39.232975006103516	30.906828760262073	34.593183953067175	FC(F)(F)c1ccccc1CN([C@H]2CCNC2)C(=O)C3CCC3
1612	CHEMBL491758	train	7.0	88.9395179666667	32.0	89.18439483642578	102.02298392945185	78.03672418313609	Fc1cnc(Nc2ccccc2)nc1Nc3ccccc3
1613	CHEMBL466046	train	7.0	6.972284095238096	22.0	6.937741756439209	7.02340351825227	10.733357342482392	N#Cc1ccccc1[C@@H]2Cc3nccn3C2
1614	CHEMBL467916	train	7.0	7.051128571428571	23.0	6.973117828369141	7.053953645050652	11.019550011212091	N#Cc1ccccc1C2Cc3nccn3C2
1615	CHEMBL4101597	train	7.0	7.960607321479503	15.132509505703434	7.109234809875488	4.390514307541462	8.648216486149972	N[C@@H]1CC[C@@H](CC1)Oc2ccc(cc2)[C@@H]3CC[C@@]4(CC3)OOC5(O4)C6CC7CC(CC5C7)C6
1616	CHEMBL4077597	train	7.0	9.233126479427682	8.2910447761194	6.971948146820068	7.206689654724306	7.925702264272864	N[C@@H]1CC[C@H](CC1)Oc2ccc(cc2)[C@@H]3CC[C@@]4(CC3)OOC5(O4)C6CC7CC(CC5C7)C6
1617	CHEMBL282625	train	7.0	134.76063727066673	22.4850746268657	93.10830688476562	65.84190845222113	79.0489818086298	NC(=N)c1cc2c(\C=C\c3ccc4OCOc4c3)cccc2s1
1618	CHEMBL4082552	test	7.0	37.660956094647155	20.19099099099099	29.21311378479004	15.357708731106413	25.60569240038365	NC(=O)C1CCN(CCOc2ccc(cc2)[C@@H]3CC[C@@]4(CC3)OOC5(O4)C6CC7CC(CC5C7)C6)CC1
1619	CHEMBL108	train	7.0	71.76324310784314	30.0	52.93927764892578	38.4229025551041	48.281355827968255	NC(=O)N1c2ccccc2C=Cc3ccccc13
1620	CHEMBL3221823	test	7.0	11.777798460362328	17.05284604761905	14.989459991455078	-9.354148697537529	8.616488950474732	NC1=CC(=NC2=C(Cc3ccccc3)C(=O)NN12)C4CC4
1621	CHEMBL2024167	train	7.0	9.063895181316271	16.754556163522032	5.238458156585693	15.667778456107957	11.681171989382989	Nc1ccc(CN2C(=O)Nc3c(N)nc(cc23)C(F)(F)F)cn1
1622	CHEMBL4077302	train	7.0	85.73211395382397	26.0	59.94395446777344	33.614540066522096	51.32265212202987	NC1CCN(CC1)S(=O)(=O)c2ccc(cc2)[C@@H]3CC[C@@]4(CC3)OOC5(O4)C6CC7CC(CC5C7)C6
1623	CHEMBL2024165	train	7.0	48.66905742719644	22.4	29.05926513671875	20.889413157364686	30.25443393031997	Nc1nc(cc2N(Cc3ccc(nc3)C(F)(F)F)C(=O)Nc12)C(F)(F)F
1624	CHEMBL1760434	train	7.0	19.27037897618263	7.326931432806342	2.312100410461426	-5.965057664348237	5.736088288775541	Nc1nc(cc2N(Cc3ccccc3)C(=O)Nc12)C(F)(F)F
1625	CHEMBL2181297	train	7.0	12.694466056186023	22.75	17.846569061279297	11.062187434102102	16.088305637891857	Nc1ncc(cc1c2ccc(nc2)C(F)(F)F)c3ccc(cc3)C(=O)N4CCNCC4
1626	CHEMBL2181488	train	7.0	8.94366660135272	17.2	5.186336040496826	6.649866733423515	9.494967343818265	Nc1ncc(cc1c2ccc(nc2)C(F)(F)F)c3ccc(cc3)C(=O)N4CCOCC4
1627	CHEMBL3124983	train	7.0	11.9808859932562	22.75	8.939212799072266	7.729288088409682	12.849846720184537	Nc1ncc(nc1c2ccc(cc2)C(F)(F)F)c3ccc(cc3)C(=O)N4CCOCC4
1628	CHEMBL3124982	train	7.0	19.604189039458138	23.720000000000006	16.25774383544922	5.663319270304851	16.311313036303055	Nc1ncc(nc1c2ccc(nc2)C(F)(F)F)c3ccc(cc3)C(=O)N4CCOCC4
1629	CHEMBL3221829	train	7.0	44.0109577579365	19.309852173913068	17.049055099487305	65.98201576474206	36.587970199019736	Nc1nccc2N(Cc3ccccc3)C(=O)Nc12
1630	CHEMBL4091290	train	7.0	17.196273108635477	11.794379767441862	11.71862506866455	0.9385281727306516	10.411951529368135	NCCCCCOc1ccc(cc1)[C@@H]2CC[C@@]3(CC2)OOC4(O3)C5CC6CC(CC4C6)C5
1631	CHEMBL4064284	train	7.0	11.882598429081659	7.62962962962963	21.302600860595703	-1.5954843939186365	9.804836131347088	NCCCCOc1ccc(cc1)[C@@H]2CC[C@@]3(CC2)OOC4(O3)C5CC6CC(CC4C6)C5
1632	CHEMBL4101605	train	7.0	12.439213714309247	8.538461538461538	4.414890766143799	0.3549371754379361	6.43687579858813	NCCCOc1ccc(cc1)[C@@H]2CC[C@@]3(CC2)OOC4(O3)C5CC6CC(CC4C6)C5
1633	CHEMBL4074912	train	7.0	25.628228257425157	8.0	16.60073471069336	33.36052329864654	20.897371566691263	NCCOc1ccc(cc1)[C@@H]2CC[C@@]3(CC2)OOC4(O3)C5CC6CC(CC4C6)C5
1634	CHEMBL4069135	train	7.0	32.22098797350034	11.574788321167908	8.185629844665527	0.8138441895867772	13.198812582230138	NCCOCCOc1ccc(cc1)[C@@H]2CC[C@@]3(CC2)OOC4(O3)C5CC6CC(CC4C6)C5
1635	CHEMBL4074019	test	7.0	38.1376339236605	18.0	23.266948699951172	-4.594175519867265	18.702601775936103	O[C@@H]1CC[C@H](CC1)NCCCOc2ccc(cc2)[C@@H]3CC[C@@]4(CC3)OOC5(O4)C6CC7CC(CC5C7)C6
1636	CHEMBL2208422	train	7.0	78.53073101615695	22.09675324675325	35.78179931640625	95.14017344411937	57.887364255858955	O[C@H](CNS(=O)(=O)c1cccc(c1)C#N)CN2CCC(CC2)Oc3ccc(Cl)c(Cl)c3
1637	CHEMBL402658	train	7.0	52.87815594175546	27.0	126.81256103515625	64.18764384931195	67.71959020655592	O=C(COc1cccc2ncnc(Nc3ccc4c(cnn4Cc5ccccn5)c3)c12)N6CCOCC6
1638	CHEMBL564935	train	7.0	28.84454692535029	21.773302491103262	53.98471450805664	40.51872276868588	36.28032167329902	O=C(N([C@H]1CCNC1)c2ccccc2)c3ccccc3Oc4ccccc4
1639	CHEMBL561878	train	7.0	42.382061685969305	26.0	19.779207229614258	28.55098425091545	29.178063291624753	O=C(N(C1CCC1)[C@H]2CCNC2)c3ccccc3Oc4ccccc4
1640	CHEMBL549584	train	7.0	10.960193257424129	10.31	8.166997909545898	10.524877172804873	9.990517084943725	O=C(N(CC1CCC1)[C@H]2CCNC2)c3ccccc3Oc4ccccc4
1641	CHEMBL521509	test	7.0	80.95635492166655	29.526315789473685	44.84965515136719	95.05913975189293	62.59786640360009	O=C(NC1CC1)C2=CN(c3cccc(c3)C#Cc4cccnc4)c5ncccc5C2=O
1642	CHEMBL3604140	test	7.0	84.28805422943724	60.0	71.61800384521484	122.4989614020129	84.60125486916624	O=C(Nc1ccc2ccccc2n1)c3cc[nH]n3
1643	CHEMBL3978380	train	7.0	74.44185711455324	42.70611940298507	63.87785720825195	48.26597192350775	57.32295141232451	O=C(NCc1cccc(c1)c2ccc(CS(=O)(=O)CC3=NNC(=O)N3)cc2)C4=Nc5ccccc5C(=O)N4
1644	CHEMBL2158777	train	7.0	87.68631857506794	25.0	83.39241790771484	61.138227386845976	64.3042409674072	OC(=O)[C@H](Cc1cccc(c1)C(F)(F)F)N2CCC(CN3CCC(CC3)Oc4ccc(Cl)c(Cl)c4)CC2
1645	CHEMBL3221821	train	7.0	50.688087020881746	16.166666666666668	45.28025436401367	62.36947220534481	43.626120064226726	OC1=NC(=CC2=C(Cc3ccccc3)C(=O)NN12)C4CC4
1646	CHEMBL291535	test	7.0	42.80052931157424	26.0	67.83331298828125	79.71734557941082	54.08779696981657	Cc1ncc(CC2=CN(CC(=O)N3CCN(CC3)c4ccc(Cl)cc4)C(=NC2=O)SCc5ccc(F)cc5)cn1
1647	CHEMBL56954	train	7.0	79.40561681329464	32.36960317460317	82.92379760742188	86.62416290795512	70.3307951258187	COc1ncc(CC2=CN(CC(=O)N3CCN(CC3)c4ccc(Cl)c(Cl)c4)C(=NC2=O)SCc5ccc(F)cc5)cn1
1648	CHEMBL2402736	train	7.0	25.869287472139504	9.87575	5.119250297546387	6.0863868432613035	11.737668653236797	CC(C)(C)C[C@@H]1N[C@H]([C@H](c2cccc(Cl)c2F)[C@@]1(C#N)c3ccc(Cl)cc3F)C(=O)Nc4ccc(cc4F)C(=O)O
1649	CHEMBL3357387	train	7.0	38.27652073267342	24.127276995305113	24.089696884155273	45.04755892005962	32.885263383048354	CC(C)(C)Cc1nc2cc(ccc2n1CC3(O)CCOCC3)S(=O)(=O)C4CN(C4)C(=O)N
1650	CHEMBL4083572	train	7.0	42.64942712406887	19.52	27.80917739868164	21.809578314904627	27.947045709413786	CC(C)c1cc([nH]n1)C(=O)N2CCC(C2)c3cc(cc(C)n3)c4cnn(C)c4
1651	CHEMBL2180068	train	7.0	28.61255919279281	24.0	27.23735237121582	12.126671538259298	22.994145775566984	CC(N1CC(C1)Oc2ncccn2)C3=Nc4c(cnn4C5CCOCC5)C(=O)N3
1652	CHEMBL577477	train	7.0	57.72179505195645	20.0	22.834238052368164	20.00371244451875	30.13993638721084	Cc1c(nn(c2ccc(Cl)cc2Cl)c1c3ccc(Cl)cc3)c4cn(cn4)C5CCOCC5
1653	CHEMBL1234899	train	7.0	36.409298521256666	19.0	30.80884552001953	31.061822218441083	29.319991564929317	Cc1nc2cc(OC(F)(F)F)ccc2n1c3ccc(s3)C(=O)NC4CC4
1654	CHEMBL4061060	test	7.0	57.14427878499202	32.50905402597404	16.2834415435791	31.554661958254346	34.37285907819987	CCOC(=O)C1=C(CN2CCOC[C@H]2C(=O)O)NC(=N[C@H]1c3ccc(F)cc3Br)c4nccs4
1655	CHEMBL2387224	train	7.0	51.472451142533856	20.5	50.52964782714844	33.929236610670934	39.107833895088305	Clc1cccc(Cl)c1C(=O)Nc2ccnc(NC(=O)C3CC3)c2
1656	CHEMBL3357382	train	7.0	52.9314135590125	21.666666666666668	60.40073776245117	52.842822126155376	46.960410028571424	CN(C)CCn1c(CC(C)(C)C)nc2cc(ccc12)S(=O)(=O)C3CN(C)C3
1657	CHEMBL3234675	train	7.0	39.19467588227722	22.0	34.96977233886719	2.9076782010481805	24.768031605548146	CN(C)CCn1c(CC(C)(C)C)nc2cc(ccc12)S(=O)(=O)C3CN(C3)C(=O)N
1658	CHEMBL2178240	train	7.0	18.420365740531786	7.358333333333334	11.278390884399414	19.949613409337932	14.251675841900617	CN1C[C@@H]([C@H](C1)c2ccc(\C=C\C(=O)Nc3ccccc3N)cc2)C(=O)Nc4cccc(Cl)c4
1659	CHEMBL2178230	train	7.0	12.13915202297521	17.0	21.728771209716797	30.82218173420163	20.42252624172341	CN1C[C@@H]([C@H](C1)c2ccc(\C=C\C(=O)Nc3ccccc3N)cc2)C(=O)Nc4ccccc4
1660	CHEMBL3357384	train	7.0	50.93379849426375	21.454545454545453	62.717315673828125	39.24114295686969	43.58670064487675	CN1CC(C1)S(=O)(=O)c2ccc3c(c2)nc(CC(C)(C)C)n3CC4CCN(CC4)C(=O)C
1661	CHEMBL2177122	test	7.0	37.008737787160776	17.0	-2.6348659992218018	34.979450737402196	21.588330631335293	Cn1cc(NC(=O)c2cnn3cccnc23)c(n1)c4c(Cl)cccc4Cl
1662	CHEMBL3692450	train	7.0	35.861674750901706	23.914428571428573	27.173974990844727	37.89428787764064	31.21109154770391	CNC(=O)c1c(nc2c3cc(ccc3OCCn12)C#C[C@@](C)(O)c4cc(C)on4)C(=O)N
1663	CHEMBL1738857	train	7.0	40.319850681338956	26.0	30.234333038330078	48.08177547198271	36.15898979791294	COc1cc2cncnc2cc1OCCc3ccc4ccccc4n3
1664	CHEMBL521089	train	7.0	122.05099383658009	31.0	61.295310974121094	120.88389068777758	83.8075488746197	COc1ccc2c(CN(C)CCn3c2c(C4CCCCC4)c5ccc(cc35)C(=O)O)c1
1665	CHEMBL4096004	train	7.0	13.2122446887766	21.0	5.716330528259277	8.983394562227003	12.22799244481572	F[C@H]1C[C@H](N(C1)S(=O)(=O)c2ccc(F)cc2)C(=O)NCc3cc(ncn3)c4ccc(nc4)C(F)(F)F
1666	CHEMBL2012963	train	7.0	32.98768315467533	15.135624934210517	16.853790283203125	25.133375900369522	22.527618568114626	Fc1cc(Cl)c2ncn(c3ccc(s3)C(=O)NC4CC4)c2c1
1667	CHEMBL2322778	train	7.0	42.995190622181546	18.64	47.34384536743164	8.45941308967738	29.35961226982264	NC(=O)c1ccc2c(OCCc3cc(sc23)c4ncnn4c5ccc(F)cc5F)c1
1668	CHEMBL2322770	test	7.0	29.656226718795548	11.199256505576189	5.1128764152526855	11.58778173020004	14.389035342456117	NC(=O)c1ccc2c(OCCc3cc(sc23)c4ncnn4CC(F)(F)F)c1
1669	CHEMBL3606018	train	7.0	18.662082858364425	11.761900000000008	0.5949082970619202	-2.8058783447847	7.053253202660413	NC(=O)c1cccc2CN(C3CCN(CC3)C4CCC(F)(F)CC4)C(=O)c12
1670	CHEMBL3623138	train	7.0	52.989367844183626	20.0	57.72509002685547	49.20173878578738	44.979049164206614	Nc1ncc(C(=O)NC2CN(C2)C(=O)C3CC3)c4ccc(nc14)c5cccc(F)c5
1671	CHEMBL3262594	train	7.0	36.149190481095	17.6	6.99863338470459	50.308402105610625	27.764056492852554	Nc1ncnc2ccc(nc12)c3cc(F)cc(NCCN4CCCC4)c3
1672	CHEMBL3127520	test	7.0	10.35377651955468	18.535699334565557	8.70826530456543	4.780872038190036	10.594653299218924	O=C(Nc1ccc(cc1)S(=O)(=O)c2ccccc2)[C@@H]3C[C@H]3c4cccnc4
1673	CHEMBL2419521	test	7.0	10.499084377002864	16.862	6.299462795257568	7.478071986940283	10.284654789800179	O=C(NCc1ccc(cc1)S(=O)(=O)C2CCCOC2)N3Cc4ccncc4C3
1674	CHEMBL2393161	train	7.0	28.951415688867886	21.57530243243238	17.279359817504883	23.335851853677635	22.785482448120696	O=C(NCc1cccnc1)Nc2ccc(cc2)S(=O)(=O)N3CC4(COC4)C3
1675	CHEMBL2393162	train	7.0	30.130721994432164	20.245170238663498	-0.1473127007484436	15.231125269459229	16.364926200451613	O=C(NCc1cccnc1)Nc2ccc(cc2)S(=O)(=O)N3CCC4(CCCN4)CC3
1676	CHEMBL3353594	train	7.0	40.3146841108597	18.7	61.62092971801758	73.29007907124554	48.48142322503071	OC(=O)c1ccc(cc1)S(=O)(=O)N(Cc2ccc(cc2)C(F)(F)F)c3ncc(cc3Cl)C(F)(F)F
1677	CHEMBL3353609	train	7.0	34.96650123301092	20.970079522862832	22.016538619995117	33.729499441076534	27.920654704236355	OC(=O)c1ccc(cc1)S(=O)(=O)N(Cc2ccc(cc2)C(F)(F)F)c3ncc(Cl)cc3Cl
1678	CHEMBL3353603	train	7.0	84.28618298993604	31.267441860465116	63.3824348449707	60.492429711362	59.857122351683465	OC(=O)c1ccc(cc1)S(=O)(=O)N(Cc2ccc(cc2)C3(CC3)C#N)c4ncc(cc4Cl)C(F)(F)F
1679	CHEMBL3353599	train	7.0	21.229330599930936	19.857142857142858	-0.16257703304290771	-6.766287392780334	8.539402257812638	OC(=O)c1ccc(cc1)S(=O)(=O)N(Cc2ccc(F)c(c2)C(F)(F)F)c3ncc(cc3Cl)C(F)(F)F
1680	CHEMBL3353608	train	7.0	36.14158426518625	20.0	51.307960510253906	59.62237629441334	41.76798026746337	OC(=O)c1ccc(cc1)S(=O)(=O)N(Cc2ccc(F)c(c2)C(F)(F)F)c3ncc(Cl)cc3Cl
1681	CHEMBL3353598	train	7.0	21.78689126641427	19.0	7.533199310302734	9.414428490385898	14.433629766775727	OC(=O)c1ccc(cc1)S(=O)(=O)N(Cc2ccc(F)cc2)c3ncc(cc3Cl)C(F)(F)F
1682	CHEMBL3353597	train	7.0	41.79089206349206	21.031428571428574	-25.635526657104492	-7.162369230352625	7.506106186865878	OC(=O)c1ccc(cc1)S(=O)(=O)N(Cc2ccc(OC(F)(F)F)cc2)c3ncc(cc3Cl)C(F)(F)F
1683	CHEMBL3353593	train	7.0	30.150244950965654	17.854761904761943	31.206993103027344	55.82481628789087	33.75920406166145	OC(=O)c1ccc(cc1)S(=O)(=O)N(Cc2cccc(c2)C(F)(F)F)c3ncc(cc3Cl)C(F)(F)F
1684	CHEMBL3353596	train	7.0	20.646686412404247	28.0	24.04945945739746	19.020840076574135	22.92924648659396	OC(=O)c1ccc(cc1)S(=O)(=O)N(Cc2cccc(OC(F)(F)F)c2)c3ncc(cc3Cl)C(F)(F)F
1685	CHEMBL3353583	test	7.0	22.75850548117946	10.623965517241379	10.644611358642578	13.915747336291044	14.485707423338614	OC(=O)c1ccc(cc1)S(=O)(=O)N(Cc2ccccc2)c3ncc(cc3F)C(F)(F)F
1686	CHEMBL3353579	train	7.0	148.17774527903467	18.0	139.09317016601562	146.0982950708062	112.84230262896412	OC(=O)c1ccc(cc1)S(=O)(=O)N(Cc2ccccc2)c3ncc(Cl)cc3Cl
1687	CHEMBL3353592	train	7.0	31.705112808261912	28.0	65.85374450683594	53.86667850402364	44.85638395478037	OC(=O)c1ccc(cc1)S(=O)(=O)N(Cc2ccccc2C(F)(F)F)c3ncc(cc3Cl)C(F)(F)F
1688	CHEMBL3353595	train	7.0	46.23089992458976	11.591081081081068	120.17064666748047	55.910207766769865	58.47570885998029	OC(=O)c1ccc(cc1)S(=O)(=O)N(Cc2ccccc2OC(F)(F)F)c3ncc(cc3Cl)C(F)(F)F
1689	CHEMBL3352829	train	7.0	34.494796260211636	23.0	29.658164978027344	59.09671573158228	36.56241924245532	OC(=O)c1ccc(cc1)S(=O)(=O)N(Cc2ccccn2)c3ncc(cc3Cl)C(F)(F)F
1690	CHEMBL3353591	train	7.0	39.25077788496829	22.0	28.406421661376953	42.3115892688766	32.99219720380546	OC(=O)c1ccc(cc1)S(=O)(=O)N(CCN2CCOCC2)c3ncc(cc3Cl)C(F)(F)F
1691	CHEMBL3353571	test	7.0	51.80817131637423	20.0	28.636486053466797	58.45447558703393	39.72478323921874	OC(=O)c1cccc(c1)S(=O)(=O)N(Cc2ccccc2)c3ncc(cc3Cl)C(F)(F)F
1692	CHEMBL479419	train	7.0	101.06904906129104	36.609375	144.28392028808594	97.82173047571472	94.94601870627292	C[C@@H]1CN(Cc2ccc(cc2)c3ccccc3C(=O)N4CCC(CC4)Nc5ccccc5)C[C@H](C)N1
1693	CHEMBL465917	train	7.0	25.42929066511135	22.868325358851674	0.3493567109107971	33.68609180009985	20.583266133743418	C[C@@H]1CN(Cc2ccc(cc2)c3cccnc3C(=O)N4CCC(CC4)Nc5ccc(F)c(F)c5)C[C@H](C)N1
1694	CHEMBL2037510	train	7.0	9.728068237188774	18.33	12.82430648803711	0.6906597637744962	10.393258622250094	CC[C@H](C)[C@H]1N([C@@H](C(=O)N(C)C)c2ccc(C)nc2C)C(=O)[C@H](NC1=O)C3Cc4ccccc4C3
1695	CHEMBL2037506	train	7.0	13.054729072289094	23.630000000000003	2.8488376140594482	4.468311681724125	11.000469592018167	CC[C@H](C)[C@H]1N([C@@H](C(=O)NC)c2cnc(C)cc2C)C(=O)[C@H](NC1=O)C3Cc4ccccc4C3
1696	CHEMBL217579	train	7.0	29.60779181159584	15.357939142857166	42.87958526611328	72.22257207071868	40.01697207282125	CN1CCCc2ccc(NC(=O)c3ccc(cc3)c4ccccc4)cc12
1697	CHEMBL245568	train	7.0	76.43324500792957	20.0	64.8841781616211	66.3043083930595	56.90543289065254	COc1ccc2nccc([C@@H]3CN(C4CCN(Cc5cc6ccccc6[nH]5)CC4)C(=O)O3)c2c1
1698	CHEMBL1289153	train	7.0	21.477213873997474	9.911428571428571	45.126625061035156	10.623209403799576	21.784619227565194	Fc1ccc(cc1)c2ccc3[nH]c(nc3c2)N4CCC5(CC4)CN(C(=O)O5)c6ccccc6
1699	CHEMBL1289039	train	7.0	7.805811628392529	7.306958947368416	-3.826906681060791	4.226917211554235	3.8781952765635967	Fc1ccc2[nH]c(nc2c1)N3CCC4(CC3)CN(C(=O)O4)c5ccccc5
1700	CHEMBL2436586	test	7.0	48.65091773822158	31.0	55.22319030761719	74.59063173095961	52.366184944199595	FC(F)(F)Oc1ccc(NC(=O)N2CCC3(CCN(CC3)C(=O)C4(CC4)C(F)(F)F)C2)cc1
1701	CHEMBL579042	train	7.0	26.118432454999162	10.0	87.5217056274414	-19.91654630366482	25.93089794469394	C[C@@H]1CNCCN1C2=CC(=O)N(C)C(=N2)CCc3ccccc3
1702	CHEMBL1096872	test	7.0	35.374891151522455	21.95955823293169	43.00404357910156	35.39121902624269	33.9324279974496	CCC\N=C\1/S\C(=C/c2ccc(O)c(Cl)c2)\C(=O)N1c3ccccc3C
1703	CHEMBL568437	train	7.0	41.32982381655978	16.871185922746776	45.21177673339844	43.28302318146776	36.67395241354319	CCN1C(=O)C=C(N=C1COc2cc(F)ccc2Cl)N3CCNCC3
1704	CHEMBL576253	train	7.0	35.77553979775529	23.4756536423841	21.67946434020996	17.41669423741189	24.58683800444031	CCN1C(=O)C=C(N=C1COc2cccc(c2)C#N)N3CCNCC3
1705	CHEMBL578365	train	7.0	15.15909028641023	20.79244412955466	10.847793579101562	16.351468232233874	15.78769905682508	CN1C(=NC(=CC1=O)N2CCNCC2)COc3cc(Cl)ccc3C
1706	CHEMBL577832	test	7.0	13.256138744298617	14.020097033898297	-1.0799022912979126	7.494969665384296	8.422825788070824	CN1C(=NC(=CC1=O)N2CCNCC2)COc3cc(F)ccc3C
1707	CHEMBL568741	train	7.0	22.434951763976446	17.989365655976687	28.18903160095215	23.33594623296723	22.987323813468127	CN1C(=NC(=CC1=O)N2CCNCC2)COc3cc(F)ccc3Cl
1708	CHEMBL577039	test	7.0	27.404160325492143	22.0	25.800371170043945	30.525906651401435	26.432609536734383	CN1C(=O)C=C(CCc2cccc(Cl)c2)N=C1N3CCNCC3
1709	CHEMBL577831	train	7.0	16.130124153195606	19.0	15.954136848449707	40.289776353982	22.843509338906827	CN1C(=O)C=C(N=C1CCc2cccc(Cl)c2)N3CCNCC3
1710	CHEMBL568236	train	7.0	83.06540133302089	22.2	25.875713348388672	11.605687613787852	35.68670057379936	CN1C(=O)C=C(N=C1CCc2ccccc2)N3CCNCC3
1711	CHEMBL578994	train	7.0	47.702120370224556	17.989365655976687	12.315011024475098	-5.277886884480689	18.182152541548913	CN1C(=O)C=C(N=C1COc2ccc(Cl)cc2)N3CCNCC3
1712	CHEMBL578564	train	7.0	34.68891793208922	21.54468668246443	57.204742431640625	32.70396494260162	36.53557799719898	CN1C(=O)C=C(N=C1COc2cccc(c2)C#N)N3CCNCC3
1713	CHEMBL572183	train	7.0	13.043499057163693	9.475694444444445	2.0367228984832764	9.623375163689605	8.544822890945255	CN1C(=O)C=C(N=C1COc2cccc(Cl)c2)N3CCNCC3
1714	CHEMBL565735	train	7.0	21.078683432221204	22.089154929577454	3.9683420658111572	22.107582239929695	17.31094066688488	CN1C(=O)C=C(N=C1COc2ccccc2C)N3CCNCC3
1715	CHEMBL1464005	train	7.0	42.042344280092586	23.0	35.16036605834961	85.46435795694914	46.416767073847836	[Br-].CC(C)[N+]1(C)[C@@H]2CC[C@H]1C[C@H](C2)OC(=O)C(CO)c3ccccc3
1716	CHEMBL1092211	train	7.0	65.28531373093173	26.7	73.93189239501953	96.58266173300503	65.62496696473907	C[C@@H]1CN(C[C@H](C)[C@@]1(O)c2ccc(F)c(F)c2)C(=O)[C@@H]3CNC[C@H]3c4ccc(F)cc4F
1717	CHEMBL1649919	train	7.0	66.12742201470414	32.0	22.776439666748047	76.4975041701088	49.35034146289024	CC(=O)N[C@@H](CCN1[C@@H]2CC[C@H]1C[C@H](C2)n3c(C)nc4CCN(Cc34)C(=O)C)c5ccccc5
1718	CHEMBL1916040	train	7.0	21.08960605048778	17.38	27.996482849121094	6.199163161698722	18.1663130153269	Cc1ncc(Cn2nc(c3nc(n[nH]3)C(F)(F)F)c4cccnc24)cn1
1719	CHEMBL1649920	test	7.0	31.290989970758652	19.71759259259259	16.629037857055664	5.53769572930346	18.293829037427592	CCC(=O)N1CCc2nc(C)n([C@H]3C[C@H]4CC[C@@H](C3)N4CC[C@H](NC(=O)C)c5ccccc5)c2C1
1720	CHEMBL1822446	train	7.0	44.32432300372583	20.0	44.93684768676758	91.28969469642365	50.13771634672926	CCNC1(CNC(=O)N2CCC(CC2)c3onc(n3)c4ccc5ccccc5n4)CCCC1
1721	CHEMBL1204062	test	7.0	53.19178310644066	33.9	26.21675682067871	68.37393648422828	45.42061910283691	Cl.C[C@@H]1CN(C[C@H](C)[C@@]1(O)c2ccc(cc2)C(F)(F)F)C(=O)[C@@H]3CN(C[C@H]3c4ccc(F)cc4F)C(C)(C)C
1722	CHEMBL1233524	train	7.0	56.54929808445026	48.64333333333333	112.58357238769531	79.0015943721735	74.1944495444131	CN(C)CCN(C)[C@H]1COc2ccccc2c3c(C4CCCCC4)c5ccc(cc5n3C1)C(=O)O
1723	CHEMBL1649916	train	7.0	55.598345233345874	22.600000000000005	61.821285247802734	71.53126908389416	52.887724891260696	CN1CCc2nc(C)n([C@H]3C[C@H]4CC[C@@H](C3)N4CC[C@H](NC(=O)C)c5ccccc5)c2C1
1724	CHEMBL498587	test	7.0	30.055373303541067	20.901585365853574	23.066757202148438	48.53578391391692	30.639874946364998	COc1ccc(nn1)-c1ccc2c(c1)N(CCO2)c1nc2c(s1)C(=O)NC(C)(C)C2
1725	CHEMBL1083755	train	7.0	58.79305437954122	23.0	50.323768615722656	46.14930994465813	44.5665332349805	CS(=O)(=O)Cn1cc(C2CC2)c(Oc3ccc(cc3)C#N)c1C4CC4
1726	CHEMBL1922905	train	7.0	40.89865184580192	17.893103448275866	26.821447372436523	43.58497269745007	32.29954384099109	FC(F)(F)c1cccc(c1)Oc1ccc(cc1Cl)Nc1ncnc2cc[nH]c12
1727	CHEMBL1916036	train	7.0	31.337825326861424	20.0	17.4532413482666	25.703558564391475	23.623656309879873	FC(F)(F)c1n[nH]c(n1)c2nc(Cc3cncnc3)c4ccccn24
1728	CHEMBL3236384	train	7.05	74.87087932855164	26.139386822810575	56.58709716796875	51.90145023227954	52.37470338790262	CN[C@@H](C)C(=O)N[C@H]1CCC[C@H]2C[C@H]3CCN(C[C@H]3N2C1=O)C(=O)c4ccccc4
1729	CHEMBL1783112	train	7.08	30.428861085522968	8.383535794392513	22.31830406188965	31.582269484242882	23.178242606512004	COc1ccc2nc(C)cc(c2c1)n3cc(CNC(=O)C)nn3
1730	CHEMBL1779198	train	7.1	60.21367847068041	23.0	72.45553588867188	75.5526051085009	57.805454866963295	CC1(C)c2cc(ccc2C(=O)c3c1[nH]c4cc(ccc34)C#N)N5CCC(O)CC5
1731	CHEMBL3236389	train	7.1	60.150401592052624	22.1794078947368	38.47910690307617	40.41038889548091	40.30482632133663	CN[C@@H](C)C(=O)N[C@H]1CCC[C@H]2C[C@H]3CCN(C[C@H]3N2C1=O)S(=O)(=O)c4ccccc4
1732	CHEMBL3589894	test	7.1	22.046688957983193	10.052234332425082	17.333820343017578	26.345243039711864	18.94449666828443	CNC(=O)c1ccc(c(N)n1)c2cc(Cl)cc(Cl)c2Cl
1733	CHEMBL2179097	train	7.1	37.77916656196582	17.4	46.483665466308594	19.621105081298737	30.320984277393286	C[C@@H]1CNC[C@H]1C2=Nc3c(cnn3C4CCOCC4)C(=O)N2
1734	CHEMBL2070605	train	7.2	18.322225914883692	25.506122448979593	3.348513603210449	-9.65919226290423	9.379417426042377	CC(C)n1cc(Cn2nnc3c(N)nc(nc23)C4CC4)cn1
1735	CHEMBL4094575	test	7.2	53.00336957920149	33.0	27.133806228637695	50.5464599730449	40.92090894522102	COc1ccc(CN2C(=O)n3ncnc3c4c5CCN(Cc5sc24)C(=O)C6CC6(F)F)cc1
1736	CHEMBL2070596	train	7.2	72.92766362950341	25.0	45.62031173706055	43.338479272040516	46.72161365965111	COCc1nc(N)c2nnn(CC3CCCCO3)c2n1
1737	CHEMBL1094181	train	7.2	40.88285066960481	27.64	70.70449829101562	71.1353412955981	52.59067256405463	NC(=O)c1c(F)ccc(OCc2nc3ncc(Cl)cc3s2)c1F
1738	CHEMBL2070604	train	7.2	48.017525897967474	16.17280868167205	10.241707801818848	35.74912503171306	27.54529185329286	Nc1nc(nc2c1nnn2Cc3cc(n[nH]3)C4CC4)C5CC5
1739	CHEMBL2070603	train	7.2	34.22785245778387	21.0	5.854452610015869	-5.72092347128019	13.840345399129887	Nc1nc(nc2c1nnn2Cc3ccc(Cl)cc3)C4CC4
1740	CHEMBL2070595	train	7.2	26.83879653392572	19.0	8.629956245422363	36.3318268435114	22.700144905714872	Nc1nc(nc2c1nnn2CC3CCCCO3)C4CC4
1741	CHEMBL2070601	test	7.2	8.0101564196658	21.007351643835616	7.131826877593994	5.4529882288526865	10.400580792487025	Nc1nc(nc2c1nnn2CC3CCCOC3)C4CC4
1742	CHEMBL2070593	train	7.2	71.13223333333332	22.0	86.4671630859375	25.443775793527628	51.26079305319961	Nc1ncnc2c1nnn2CC3CCCCO3
1743	CHEMBL3127701	train	7.2	54.24332201816794	63.5	44.107521057128906	-14.130071625212318	36.93019286252113	O=C(C1CC12CCN(CC2)C3CCOCC3)N4CCN(CC4)C5CCCC5
1744	CHEMBL3747343	train	7.2	40.38651992424243	23.0	34.02789306640625	74.61022839187395	43.00616034563066	OC(=O)C1(CCC1)Sc2ccnc3ccccc23
1745	CHEMBL2011778	test	7.2	25.33950548085606	11.850204081632654	97.77796936035156	49.02949517376529	45.99929352415139	CC1(C)C[C@H](O)C[C@](C)(CNc2cc(F)cc(c2)S(=O)(=O)N)C1
1746	CHEMBL4086408	train	7.2	24.776583810960283	25.0	34.10185241699219	29.34580593212884	28.30606054002033	CC1C=C(C=C(Nc2ccc(cc2)N3CCN(CC3)C4COC4)C1=O)c5ccnc(N6CCn7c8CC(C)(C)Cc8cc7C6=O)c5CO
1747	CHEMBL3262592	train	7.2	11.884412386378287	22.733333333333334	3.521260976791382	14.942283419971158	13.270322529118541	Nc1ncnc2ccc(cc12)c3cc(F)cc(NC(=O)CN4CCCC4)c3
1748	CHEMBL2151326	test	7.24	41.13568150259688	17.293122529644283	10.839713096618652	65.81471755247193	33.77080867033294	COc1cc(Nc2nc3c(cc2F)ncn3[C@@H](CO)c4ccc(F)cn4)n[nH]1
1749	CHEMBL3937635	train	7.3	51.67873437641829	27.64	72.02135467529297	101.97835479174304	63.329610960863576	COc1ccc(cn1)[C@@H](Oc2ccc3c(cnn3c4ccc(F)cc4)c2)[C@H](C)NC(=O)C5CC5
1750	CHEMBL3125000	train	7.3	37.39663801348112	21.0	20.18112564086914	-0.9315772313931032	19.41154660573929	COc1ccc(cn1)c2cc(cnc2I)c3ccc(cc3)S(=O)(=O)C
1751	CHEMBL1643881	test	7.3	15.541186666666674	10.0	10.280712127685547	13.253466931257154	12.268841431402343	O=C1N(Cc2n[nH]c3cccc1c23)[C@H]4CN5CCC4CC5
1752	CHEMBL3262591	train	7.3	26.266192629174487	19.0	47.53287887573242	37.78261100647058	32.64542062784437	CC(=O)Nc1cc(F)cc(c1)c2ccc3ncnc(N)c3c2
1753	CHEMBL2181525	train	7.3	84.12998837964416	19.007518796992507	61.53540802001953	83.88683833785691	62.13993838362828	CCNC(=O)Nc1ccc(cc1)c2nc3CN(CCc3c(n2)N4CCOC[C@@H]4C)c5cccnn5
1754	CHEMBL274737	train	7.355	32.4904581334913	20.887894736842107	31.530994415283203	57.97819626352336	35.72188588728499	CC[C@H](CO)Nc1nc(SCc2ccccc2)nc3nc(N)sc13
1755	CHEMBL1783253	train	7.4	31.798308673517596	19.0	24.056827545166016	18.36062652402934	23.30394068567824	COc1ccc(OC)c(c1)c2cccc3c(N)c(nnc23)C(=O)NC4CC4
1756	CHEMBL3310187	train	7.4	32.17551358866454	20.0	19.207021713256836	13.872096199480547	21.313657875350483	CC(C)(C)C[C@@H]1N[C@H]([C@H](c2cccc(Cl)c2F)[C@]13C(=O)Nc4cc(Cl)ccc34)C(=O)Nc5ccc(cc5F)C#N
1757	CHEMBL1651461	train	7.4	37.453961487355116	10.36282113821138	58.40724182128906	21.293222754337002	31.87931180029814	Cc1cc(NC2=NN(Cc3ccccc3)C(=O)c4ccccc24)n[nH]1
1758	CHEMBL2325697	train	7.41	22.180850524570886	13.245024924242424	18.98236083984375	28.35795027470162	20.691546640839668	C[C@@H]1COCCN1c2cc(nc(n2)c3cccc4[nH]ccc34)C5(CC5)S(=O)(=O)C
1759	CHEMBL243001	train	7.41	144.07436193212246	25.495833333333334	44.62889099121094	159.44276916769016	93.41046385608922	CC(C)N1CCC[C@H](CN2C(=Nc3ccc(Oc4ccc(F)cc4)cc3C2=O)C)C1
1760	CHEMBL1290353	train	7.41	67.05203333333333	32.400000000000006	38.671836853027344	63.69904778007424	50.45572949160873	CCC(NC(=O)Nc1cc(Cl)ccc1Cl)(C(F)(F)F)C(F)(F)F
1761	CHEMBL1934266	train	7.5	67.31940318444447	50.0	36.66555404663086	37.763948721601594	47.93722648816923	CCC(CC)NC(=O)c1c(C)nn(C(C)C)c1NS(=O)(=O)c2ccc(C)cc2
1762	CHEMBL1779512	train	7.5	53.78002294583487	19.26378723404253	23.52928924560547	49.68071763051168	36.563454263998636	COC[C@@H](O)CN1C(=O)C=NN(C1=O)c2ccc(Cl)c(c2)C(=O)NCC3(O)CCCCCC3
1763	CHEMBL3127116	train	7.5	44.78914032684915	18.0	15.254609107971191	47.53731121844836	31.395265163317177	NC1=NC(=C(Cl)C(=O)N1)c2ccc(OCC3CCOC3)c(c2)C(F)(F)F
1764	CHEMBL3310185	train	7.5	51.939756149877056	28.0	50.56755065917969	64.41349159673219	48.730199601447225	CC(C)(C)C[C@@H]1N[C@H]([C@H](c2cccc(Cl)c2F)[C@]13C(=O)Nc4cc(Cl)ccc34)C(=O)Nc5ccc(cc5)C(=O)N
1765	CHEMBL3310188	train	7.5	55.61763955211485	23.0	47.34218215942383	15.34922033593522	35.327260511868474	COc1cc(ccc1c2ccccc2NC(=O)[C@@H]3N[C@@H](CC(C)(C)C)[C@]4([C@H]3c5cccc(Cl)c5F)C(=O)Nc6cc(Cl)ccc46)C(=O)N
1766	CHEMBL3109036	train	7.5	44.03050713955959	26.428571428571427	27.398387908935547	46.24450282876379	36.02549232645759	COc1cc(ccc1NC(=O)[C@@H]2N[C@@H](CC(C)(C)C)[C@]3([C@H]2c4cccc(Cl)c4F)C(=O)Nc5cc(Cl)ccc35)C(=O)N
1767	CHEMBL3805643	train	7.5	48.0493510522474	30.0	75.61851501464844	50.74351238537617	51.102844613068	Fc1cc(F)cc(Cc2ccc3[nH]nc(NC(=O)c4ccc(cc4NC5CCOCC5)N6CCNCC6)c3c2)c1
1768	CHEMBL3353606	train	7.5	12.684053405851405	18.314814814814813	8.856950759887695	8.697781705196192	12.138400171437526	OC(=O)c1ccc(cc1)S(=O)(=O)N(Cc2ccc3occc3c2)c4ncc(cc4Cl)C(F)(F)F
1769	CHEMBL3827971	train	7.5	25.9963932049799	22.0	18.69488525390625	39.384780099610744	26.519014639624224	CCCCc1ccc(cc1)c2nc(C)c(s2)c3ccnc(NC(=N)N(C)C)n3
1770	CHEMBL66089	test	7.59	53.54915715152006	27.0	66.35871887207031	136.31715651104895	70.80625813365984	Nc1ncnc2nc(cc(c3cccc(Br)c3)c12)c4ccc(nc4)N5CCOCC5
1771	CHEMBL476954	train	7.6	33.39348260666843	25.382098765432097	26.59617805480957	33.42040366237697	29.698040772321768	CC(C)C(=O)N(Cc1cccc(Cl)c1Cl)[C@H]2CCNC2
1772	CHEMBL2181491	train	7.6	23.22116147782495	10.073421052631579	24.438201904296875	-6.312975043986843	12.85495234769164	COc1ccc(cn1)c2cc(cnc2N)c3cccc(c3)S(=O)(=O)C
1773	CHEMBL2397489	train	7.6	38.33492271260706	21.54162162162162	83.97425079345703	46.81054300714228	47.665334533707004	N[C@@H](Cc1ccccc1)C(=O)N2CC[C@@H]([C@@H]2C(=O)N)c3ccccc3
1774	CHEMBL2386643	train	7.6	5.234777834550474	7.326829268292684	4.252441883087158	18.036310218221743	8.712589801038014	CC[C@@H](O)c1nc2cnc3[nH]ccc3c2n1C4CCCCC4
1775	CHEMBL1682850	train	7.6	31.512909537210952	20.025903614457835	37.18431854248047	19.265471860365587	26.99715088862871	CN1C(=O)C=C(C=C1N2CCC(O)(CC2)c3ccccc3)c4ccncn4
1776	CHEMBL1682840	train	7.6	30.093544666666677	29.333333333333332	43.166259765625	47.482502636318685	37.518910100485925	CN1C(=O)C=C(C=C1N2CCOCC2)c3ccncn3
1777	CHEMBL1182657	train	7.7	120.56811760255665	44.207467741935474	131.602783203125	160.6696891688833	114.26201442912512	C[N+]1(C)[C@@H]2C[C@@H](C[C@@H]1[C@H]3O[C@@H]23)OC(=O)C(O)(c4cccs4)c5cccs5
1778	CHEMBL1783280	test	7.7	37.745456866739275	22.495280627907007	25.620351791381836	2.415257993143996	22.06908681979303	CCCNC(=O)c1nnc2c(cccc2c1N)c3cnccc3OC
1779	CHEMBL3986273	test	7.7	83.33923322275702	27.0	103.5652847290039	97.90218182626427	77.9516749445063	CN1C=C(C=C(N2CCOCC2)C1=O)c3cc(NC(=O)c4cccc(c4)C(F)(F)F)cnc3C
1780	CHEMBL4062317	train	7.7	45.965445463081636	21.71999999999999	52.203102111816406	41.77749883379311	40.41651160217279	CN1C=C(C=C(N2CCOCC2)C1=O)c3cc(NC(=O)c4ccnc(c4)C(F)(F)F)cnc3C
1781	CHEMBL2164676	train	7.7	38.54621211769897	25.825000000000003	36.78257369995117	65.110102834433	41.56597216302079	O=C(NCC#N)[C@@H]1CCCC[C@H]1C(=O)N2CCN(CC2)c3ccccc3
1782	CHEMBL3781694	train	7.7	42.829141666666644	22.0	18.94105339050293	45.36000594116207	32.28255024958291	Cc1c(F)cccc1[C@H]2COC(=N2)N
1783	CHEMBL1951909	train	7.75	26.236356407363754	18.0	13.83293342590332	4.900973940489503	15.742565943439145	CCN(C1CCN(CC[C@H](N2CCN(CC2)S(=O)(=O)C)c3cc(F)cc(F)c3)CC1)C(=O)Cc4ccc(cc4)S(=O)(=O)C
1784	CHEMBL492529	train	7.75	36.91149667156178	17.0	22.3100643157959	31.26560105948137	26.87179051170976	Cc1cc(Nc2ccc(cc2)C(F)(F)F)n3ncnc3n1
1785	CHEMBL1363924	train	7.76	92.70007013463538	32.0	85.55059814453125	72.16487317124857	70.6038853626038	CCn1c(SCC(=O)Nc2cc(C)on2)nnc1c3cccnc3
1786	CHEMBL1645105	train	7.76	23.7381902020202	19.0	57.845821380615234	15.833624688887818	29.104409067880816	COc1ccc(cn1)c2ccc3nc(N)sc3c2
1787	CHEMBL3086113	train	7.8	51.10795577113997	19.5	43.40604019165039	62.46207287306655	44.11901720896423	FC1(F)CCC(CC1)NC(=O)c2cc3c(Cl)cc(Cl)cc3[nH]2
1788	CHEMBL2178264	train	7.8	64.75306243316963	20.884666666666668	57.220550537109375	57.204529307601746	50.01570223613685	CC(C)(O)Cn1cc(NC(=O)c2cnn3cccnc23)c(n1)c4cccc(Cl)c4
1789	CHEMBL1682837	train	7.8	33.93958102564101	17.8625	20.41765022277832	2.253110757188623	18.61821050140199	CN1C(=O)C=C(C=C1c2ccccc2)c3ccncn3
1790	CHEMBL3262593	train	7.8	15.137092640031604	18.12354523178808	4.383289337158203	10.401542982131811	12.011367547777425	Nc1ncnc2ccc(nc12)c3cc(F)cc(NC(=O)CN4CCCC4)c3
1791	CHEMBL2205509	train	7.9	34.55051173497409	14.43727110091743	55.052490234375	0.3217791731320789	26.090513060849652	CC(C)COc1ccc(cc1C#N)c2cc(O)nc(N)n2
1792	CHEMBL2164675	train	7.9	48.93857203829504	23.5	26.210834503173828	44.32916222773588	35.744642192301185	CN1CCN(CC1)C(=O)[C@@H]2CCCC[C@H]2C(=O)NCC#N
1793	CHEMBL1095097	test	7.9	112.49052815326233	74.0	98.59407806396484	168.30738865554991	113.34799871819428	COC(=O)[C@@H]1CC2=CC(=O)CC[C@]2(C)[C@@]34O[C@@H]3C[C@@]5(C)[C@@H](CC[C@@]56CCC(=O)O6)[C@H]14
1794	CHEMBL4101904	train	7.9	7.998571785714287	52.0	7.972394943237305	8.498374809372184	19.117335384580944	CN1C=C(C=C(Nc2ccc(cn2)N3CCN(CC3)C4COC4)C1=O)c5cncc(N6CCn7c8CCCCc8cc7C6=O)c5CO
1795	CHEMBL2071011	train	7.9	52.76972623011695	26.0	26.894168853759766	13.364293739949467	29.757047205956546	FC(F)(F)Oc1ccc(cc1)c2csc(NC(=O)[C@H]3CCCCN3S(=O)(=O)c4ccc(OC(F)(F)F)cc4)n2
1796	CHEMBL207688	test	7.9	55.93720753237926	5.524760097560992	66.88753509521484	26.131907840321322	38.62035264136911	Cc1ccc(c2cccc(c2)C(=O)O)n1c3cc(Cl)ccc3OCc4ccccc4
1797	CHEMBL1256967	train	7.94	49.197756926090996	24.0	28.212587356567383	62.22936455855288	40.90992721030281	CC1(C)[C@H](NC(=O)\C(=N/OCC2=CC(=O)C(=CN2O)O)\c3csc(N)n3)C(=O)N1OS(=O)(=O)O
1798	CHEMBL580	train	7.94	32.05579713492063	21.63222222222222	26.372425079345703	9.436532873775308	22.374244327565965	OC1N=C(c2ccccc2Cl)c3cc(Cl)ccc3NC1=O
1799	CHEMBL3577886	train	8.0	18.984369532022864	16.442087043478242	34.820858001708984	3.569148758610025	18.45411583395503	C[C@@H](N(Cc1cccc(c1)C(=O)O)C(=O)c2cc3ccccc3nn2)c4ccc(F)cc4
1800	CHEMBL3577885	train	8.0	74.53254161241394	19.0	35.99928665161133	19.59250507566792	37.281083334923295	C[C@@H](N(Cc1cccc(c1)C(=O)O)C(=O)c2cnc3ccccc3c2)c4ccc(F)cc4
1801	CHEMBL2335909	test	8.0	27.35444759555849	21.05681481481481	14.183484077453613	27.497571138248784	22.523079406518924	C[C@@H](NC(=O)C)c1ccc(Nc2ncc3cc(c(Cl)cc3n2)c4ccncc4)cc1
1802	CHEMBL4078214	train	8.0	33.81797624013746	10.0	21.215709686279297	59.628860528054005	31.16563661361769	C[C@@H]1CN([C@@H](CO1)c2ccc(F)cc2)c3ccc4OCC(=O)Nc4n3
1803	CHEMBL4079143	train	8.0	22.525408406371408	18.0	13.937500953674316	4.372069722689653	14.708744770683845	C[C@@H]1CN([C@@H](CO1)c2ccccc2)c3ncc4OCC(=O)Nc4n3
1804	CHEMBL1689120	train	8.0	31.663783328475382	19.404999999999987	11.041943550109863	12.604397364955842	18.678781060885267	C[C@@H]1CN(Cc2cc(Cl)ccc2OCC(=O)O)CCN1S(=O)(=O)c3ccccc3
1805	CHEMBL468711	train	8.0	47.1872695011655	18.0	5.627796173095703	11.781999012471834	20.64926617168326	C1[C@H](Cn2ccnc12)c3ccccc3c4cccnc4
1806	CHEMBL513691	test	8.0	18.100029415584416	18.0	21.548826217651367	18.03751040526424	18.921591509625006	C1[C@H](Cn2ccnc12)c3ccccc3c4cncnc4
1807	CHEMBL1837029	train	8.0	47.34609072406482	22.0	71.5236587524414	59.64477187723294	50.12863033843479	C1CN(CCC1c2nnc3COCc4ccccc4n23)c5ccccn5
1808	CHEMBL1916237	train	8.0	10.297847222222222	17.5	17.876733779907227	-4.413203099241944	10.315344475721876	CC(=O)N[C@@H]1C(C)(C)[C@@H](Oc2ccc(C#N)c(Cl)c2)C1(C)C
1809	CHEMBL1224238	train	8.0	40.57818290949329	25.0	38.10902404785156	27.925538207377368	32.90318629118055	CC(C)(C)CCC1(CCNC1)C(=O)c2cc3ccccc3[nH]2
1810	CHEMBL2419590	train	8.0	65.31047571525406	28.0	51.13576889038086	30.13914593200765	43.646347634410645	CC(C)(C)n1cc2CC3(CCN(CC3)C(=O)c4ccc5[nH]nc(c5c4)C(F)(F)F)NC(=O)c2n1
1811	CHEMBL2419591	train	8.0	22.697732006540033	18.345664885361547	32.321075439453125	15.926236833728806	22.322677291270878	CC(C)(C)n1cc2CC3(CCN(CC3)C(=O)c4ccc5[nH]nc(Cl)c5c4)NC(=O)c2n1
1812	CHEMBL2419603	train	8.0	25.98940094382505	20.0	6.724277973175049	14.544652526574641	16.814582860893683	CC(C)(C)n1cc2CC3(CCN(CC3)C(=O)c4ccc5[nH]ncc5c4)NC(=O)c2n1
1813	CHEMBL2419594	train	8.0	25.085793459958072	24.43125	19.93892478942871	11.118744705197143	20.143678238645983	CC(C)(C)n1cc2CC3(CCN(CC3)C(=O)c4cnc5c(Cl)c[nH]c5c4)NC(=O)c2n1
1814	CHEMBL4084106	train	8.0	37.69966133244728	19.5	7.69059419631958	-23.304379647779403	10.396468970246865	CC(C)(N)c1nc(c[nH]1)c2ccc(OC(F)(F)F)cc2
1815	CHEMBL580910	train	8.0	104.37186485569985	53.0	92.88905334472656	89.04428225230022	84.82630011318166	CC(C)(N)CNC(=O)C[C@@H]1CC[C@@]2(CC1)OOC3(O2)C4CC5CC(CC3C5)C4
1816	CHEMBL4081835	train	8.0	50.09743776974381	31.0	22.065725326538086	13.751623098750477	29.22869654875809	CC(C)(O)CNCCCOc1ccc(cc1)[C@@H]2CC[C@@]3(CC2)OOC4(O3)C5CC6CC(CC4C6)C5
1817	CHEMBL2419605	train	8.0	48.13639457398227	24.5	31.208885192871094	50.01537719845205	38.465164241326356	CC(C)n1cc2CC3(CCN(CC3)C(=O)c4cc(C)c5[nH]nc(C)c5c4)NC(=O)c2n1
1818	CHEMBL1257487	train	8.0	29.998165917766485	16.692039735099303	19.777748107910156	91.71123726356088	39.54479775608421	CC(C)N1CCC(CC1)Oc2ccc3c(c2)cc4C(=O)N(Cc5ccncc5)CCn34
1819	CHEMBL2419609	train	8.0	23.394174081498218	14.605777777777778	19.78339958190918	9.09616976577253	16.719880301739426	CC(C)n1ncc2CC3(CCN(CC3)C(=O)c4cc(C)c5[nH]nc(C)c5c4)NC(=O)c12
1820	CHEMBL1774907	train	8.0	49.866438287924005	33.67857142857143	49.43206787109375	39.302959166757624	43.0700091885867	CC(C)NC(=O)N1Cc2nc(N)nc(c2C1)c3c(Cl)cc(Cl)cc3OCCCC(F)(F)F
1821	CHEMBL2403843	train	8.0	74.28043527312988	29.13695652173913	24.321502685546875	20.41253565130083	37.03785753292918	CC(C)Oc1cc(C2CCN(C)CC2)c(C)cc1Nc3ncc(C)c(Nc4ccccc4S(=O)(=O)C(C)C)n3
1822	CHEMBL1774932	train	8.0	13.723444065452767	20.394039735099337	8.888602256774902	12.499736712607671	13.87645569248367	CC(F)(F)CNC(=O)N1Cc2nc(N)nc(c2C1)c3c(Cl)cc(Cl)cc3OCCn4cc(F)cn4
1823	CHEMBL1738805	test	8.0	51.50582217179837	23.70947611428571	23.87379264831543	30.033295876127486	32.28059670263175	CC(F)(F)CNC(=O)N1Cc2nc(N)nc(c2C1)c3c(Cl)cc(Cl)cc3OCCn4cccn4
1824	CHEMBL3577900	test	8.0	56.900881234254875	17.0	59.46931076049805	51.313438415698386	46.17090760261283	CC[C@@H](N(Cc1cccc(c1)C(=O)O)C(=O)c2cnc3ccccc3c2)c4ccc(F)cc4
1825	CHEMBL1916244	train	8.0	42.25628545048254	20.0	59.1994514465332	27.261369234399325	37.17927653285376	CC1(C)[C@@H](NC(=O)c2cn[nH]c2)C(C)(C)[C@@H]1Oc3ccc(C#N)c(Cl)c3
1826	CHEMBL2386917	train	8.0	30.074157462387358	10.0	37.97683334350586	81.08904156197728	39.785008091967626	CC1=CC=CC2=NC(=CC(=O)N12)Cn3cnc4ccccc34
1827	CHEMBL2386926	train	8.0	17.785982691062873	10.0	6.31129789352417	56.00322549515779	22.525126519936208	CC1=CN2C(=O)C=C(Cn3cnc4ccccc34)N=C2S1
1828	CHEMBL2386925	train	8.0	26.68409821125731	9.825131639722864	17.108154296875	-6.048761369723015	11.89215569453304	CC1=CSC2=NC(=CC(=O)N12)Cn3cnc4ccccc34
1829	CHEMBL1917440	test	8.0	170.86270034843227	31.0	78.87813568115234	131.01073656114096	102.9378931476814	Cc1c(Sc2ccc(Cl)cc2)c3c(cccc3n1CC(=O)O)c4cnccn4
1830	CHEMBL2419604	train	8.0	28.79893731843369	21.0	14.726614952087402	14.935480030080456	19.865258075150386	Cc1cc(cc2c(C)n[nH]c12)C(=O)N3CCC4(CC3)Cc5cn(nc5C(=O)N4)C(C)(C)C
1831	CHEMBL855	train	8.0	116.32540733333335	26.0	83.42167663574219	45.446816171733296	67.7984750352022	Cc1ccc(cc1)\C(=C/CN2CCCC2)\c3ccccn3
1832	CHEMBL1760440	train	8.0	7.583193822253665	10.0	7.264063835144043	4.008760819617872	7.214004619253895	Cc1ccc(CN2C(=O)Nc3c(N)nc(cc23)C(F)(F)F)nn1
1833	CHEMBL1760583	train	8.0	41.286387167921454	18.0	29.71639060974121	45.098877428639994	33.52541380157567	Cc1ccc(CN2C(=O)Nc3c(N)nc(cc23)n4cccn4)cn1
1834	CHEMBL1760587	train	8.0	27.351696660021762	24.0	22.267902374267578	17.813437831420575	22.858259216427477	Cc1ccc(CN2C(=O)Nc3c(N)nc(OCC4CCOCC4)cc23)cn1
1835	CHEMBL1760439	test	8.0	15.271482935331353	18.0	12.95598030090332	19.836467085983756	16.515982580554606	Cc1cccc(CN2C(=O)Nc3c(N)nc(cc23)C(F)(F)F)n1
1836	CHEMBL341087	train	8.0	46.16364442788067	18.0	73.62450408935547	78.38689793237504	54.0437616124028	CC1CN(CCN1)C(=O)c2cc3ccccc3[nH]2
1837	CHEMBL2070735	train	8.0	34.622713149704325	21.428571428571427	42.53308868408203	45.564680320284864	36.03726339566066	Cc1nc(N)c2nnn(C[C@H]3CN(Cc4nccs4)CCO3)c2n1
1838	CHEMBL2375962	test	8.0	41.832381087532234	21.686949640287768	27.022464752197266	15.233716791431076	26.443878067862087	Cc1nc(N)nc2N([C@@H]3CC[C@@H](CC3)OCC(=O)N)C(=O)C(=Cc12)c4cn[nH]c4
1839	CHEMBL2375959	test	8.0	17.891764663259508	23.0	8.275976181030273	10.47496223190247	14.910675769048062	Cc1nc(N)nc2N([C@@H]3CC[C@@H](CC3)OCC(=O)N)C(=O)C(=Cc12)c4cnc5ccccc5c4
1840	CHEMBL2375960	train	8.0	41.38240874396089	16.555555555555557	33.484100341796875	31.297848914194546	30.679978388876965	Cc1nc(N)nc2N([C@@H]3CC[C@@H](CC3)OCC(=O)N)C(=O)C(=Cc12)c4cnn(C)c4
1841	CHEMBL2375953	train	8.0	44.92211222066551	24.5	39.307552337646484	46.209329356019914	38.73474847858298	Cc1nc(N)nc2N([C@@H]3CC[C@H](CC3)OCC(=O)N)C(=O)C(=Cc12)c4cnc5ccccc5c4
1842	CHEMBL2375967	train	8.0	22.764923430556973	20.448689138576768	23.372793197631836	24.02520206985051	22.652901959154022	Cc1nc(N)nc2N([C@@H]3CC[C@H](CC3)OCO)C(=O)C(=Cc12)c4cn[nH]c4
1843	CHEMBL2375965	train	8.0	55.821957680390184	29.0	33.3150749206543	39.76931722671874	39.476587456940806	Cc1nc(N)nc2N([C@@H]3CC[C@H](CC3)OCO)C(=O)C(=Cc12)c4cnc5ccccc5c4
1844	CHEMBL2375966	train	8.0	22.542981161919446	19.71	12.055978775024414	13.707987556126856	17.00423687326768	Cc1nc(N)nc2N([C@@H]3CC[C@H](CC3)OCO)C(=O)C(=Cc12)c4cnn(C)c4
1845	CHEMBL1916412	test	8.0	50.19388223625544	25.1	54.534542083740234	10.805818275283329	35.15856064881976	Cc1nc(O[C@@H]2C(C)(C)[C@@H](NC(=O)c3cnc4ncccn34)C2(C)C)ccc1C#N
1846	CHEMBL1837015	train	8.0	40.738264332194575	23.0	36.3321418762207	-2.3664354762326796	24.42599268304565	Cc1nnc(C2CCN(CC2)c3ccccn3)n1c4ccc(cc4)C#N
1847	CHEMBL1837011	train	8.0	32.55917925451633	20.0	33.882591247558594	7.541160696892174	23.495732799741774	Cc1nnc(C2CCN(CC2)c3ccccn3)n1c4ccccc4
1848	CHEMBL1837018	test	8.0	44.76414351184531	45.09850265625005	56.4478645324707	18.36719939108405	41.16942752291253	Cc1nnc(C2CCN(CC2)c3ccccn3)n1Cc4ccccc4
1849	CHEMBL1760445	train	8.0	7.60712632403311	7.25	16.51790428161621	-1.6330629350844217	7.435491917641225	Cc1occ(CN2C(=O)Nc3c(N)nc(cc23)C(F)(F)F)n1
1850	CHEMBL1760443	test	8.0	7.992622929313024	18.7	7.1912055015563965	11.170992172976447	11.263705150961467	Cc1onc(CN2C(=O)Nc3c(N)nc(cc23)C(F)(F)F)c1
1851	CHEMBL2386928	train	8.0	39.92753500935916	23.0	30.92306137084961	129.4660721602545	55.82916713511582	CCC1=NN2C(=O)C=C(Cn3cnc4ccccc34)N=C2S1
1852	CHEMBL2024169	train	8.0	29.703295345458088	20.27777777777778	39.27405548095703	7.094884226641712	24.08750320770865	CCc1coc(n1)c2cc3N(Cc4ccc(C)nc4)C(=O)Nc3c(N)n2
1853	CHEMBL212689	train	8.0	21.725780313425126	18.0	21.460416793823242	6.324035822991757	16.87755823256003	CCN(C1CCN(CC[C@H](c2ccc(cc2)S(=O)(=O)C)c3cc(F)cc(F)c3)CC1)C(=O)Cc4ccc(cc4)S(=O)(=O)C
1854	CHEMBL2010830	train	8.0	39.6951956970154	22.06	31.313655853271484	44.03282544542829	34.27541924892879	CCN(C1CCN(Cc2ccc(cc2)C(F)(F)F)CC1)C(=O)Cc3ccc(cc3)S(=O)(=O)C
1855	CHEMBL1946619	train	8.0	58.683718819772096	30.632571428571442	60.718109130859375	39.850657156128044	47.47126413383274	CCN(CC)C(=O)c1ccc(cc1)C(=C2CCNCC2)c3ccccn3
1856	CHEMBL331372	train	8.0	57.13783849181792	29.64819277108436	38.73092269897461	19.833431095800318	36.3375962644193	CCNC(=O)[C@H]1O[C@H]([C@H](O)[C@@H]1O)n2cnc3c(N)nc(NCCc4ccc(CCC(=O)O)cc4)nc23
1857	CHEMBL431	train	8.0	66.62378641042636	25.0	44.68829345703125	24.931861491372718	40.310985339707585	CCOC(=O)[C@H](CCc1ccccc1)N[C@@H](C)C(=O)N2CC3(C[C@H]2C(=O)O)SCCS3
1858	CHEMBL1165	train	8.0	81.6586048354174	55.0	87.95423126220703	66.60906261501597	72.8054746781601	CCOC(=O)[C@H](CCc1ccccc1)N[C@@H](C)C(=O)N2Cc3cc(OC)c(OC)cc3C[C@H]2C(=O)O
1859	CHEMBL76098	train	8.0	71.20643673333333	24.958403755868545	28.507230758666992	113.37624761126051	59.512079714782345	CCOC(=O)C[C@H](NC(=O)CCC(=O)Nc1ccc(cc1)C(=N)N)C#C
1860	CHEMBL3124985	train	8.0	38.51149181339664	18.0	24.939220428466797	21.37413969729075	25.70621298478855	CCS(=O)(=O)c1ccc(cc1)c2cnc(N)c(n2)c3ccc(nc3)C(F)(F)F
1861	CHEMBL1800172	train	8.0	41.550393878891484	9.04	49.28019332885742	28.97006901833523	32.21016405652104	CCS(=O)(=O)c1ccc2c(c1)nc(C3CCC3)n2CC4CC4
1862	CHEMBL1800178	train	8.0	47.308625092857156	22.150384615384617	57.929718017578125	-29.15854964559694	24.557544520055743	CCS(=O)(=O)c1ccc2c(c1)nc(n2C3CC3)C(C)(C)C
1863	CHEMBL1800174	test	8.0	16.300486001959058	9.361940700808619	11.551257133483887	15.729269843703227	13.235738419988698	CCS(=O)(=O)c1ccc2c(c1)nc(n2CC3CC3)C4(C)CC4
1864	CHEMBL1800180	test	8.0	57.95517575949829	30.0	62.6594352722168	20.082543018357818	42.674288512518224	CCS(=O)(=O)c1ccc2c(c1)nc(n2CCN(C)C)C(C)(C)C
1865	CHEMBL556539	train	8.0	13.497103788918388	8.222222222222221	8.744280815124512	18.61188478440681	12.268872902667983	CCSc1ccccc1C(=O)N(CC2CCC2)[C@H]3CCNC3
1866	CHEMBL2386919	train	8.0	44.95267318783069	19.863636363636363	21.015295028686523	43.513302602976154	32.33622679578244	ClC1=CN2C(=O)C=C(Cn3cnc4ccccc34)N=C2C=C1
1867	CHEMBL2069800	train	8.0	98.71531014523809	34.00333333333332	132.8888397216797	63.54836827473733	82.28896286874709	Clc1cc(ccn1)c2oc(CSc3nnc(c4ccncc4)n3C5CC5)nn2
1868	CHEMBL1837032	train	8.0	36.57286214761905	25.125	42.7883186340332	29.962768646962985	33.61223735715381	Clc1ccc2COCc3nnc(C4CCN(CC4)c5ccccn5)n3c2c1
1869	CHEMBL2048824	test	8.0	40.276302986938575	30.0	36.339569091796875	43.29447894964588	37.477587757095336	Clc1ccc2nc(CC(=O)N3CCC4(CC3)CN(Cc5ccc(cc5)c6ncccn6)C4)cn2c1
1870	CHEMBL1836889	train	8.0	53.524390536411154	21.024342105263155	38.039188385009766	36.47388453863954	37.2654513913309	CN(C)CCN1CCN(CC1)c2ccc(CN3C(=O)Nc4c(N)nc(cc34)C(F)(F)F)cn2
1871	CHEMBL4075204	train	8.0	38.01597957134843	19.25	22.272571563720703	36.76825783624573	29.076702242828716	CN1C(=O)C2=C(N(CC(=O)Nc3ccc(nn3)c4ccc(C)nc4)CCC2)C1=O
1872	CHEMBL1774920	test	8.0	47.92045065664587	23.145977157360395	63.24543762207031	54.63930433517082	47.23779244281185	CNC(=O)N1Cc2nc(N)nc(c2C1)c3c(Cl)cc(Cl)cc3OCCn4cccn4
1873	CHEMBL469127	train	8.0	44.4364428834074	14.791375528169008	42.994625091552734	19.93938106963064	30.540456143189946	CNS(=O)(=O)CCc1ccccc1[C@@H]2Cc3nccn3C2
1874	CHEMBL1934424	train	8.0	76.44216480079359	53.0	107.58540344238281	106.72956716719092	85.93928385259183	CO[C@@H]1CC[C@@H](CC1)n2nc(C)c(C(=O)N[C@@H](C)C(C)(C)C)c2NS(=O)(=O)c3ccc(C)cc3
1875	CHEMBL4059632	train	8.0	42.88793863067186	30.0	63.798927307128906	31.56703341296217	42.063474837690734	COC[C@@H]1CN([C@@H](CO1)c2ccccc2)c3ccc4OCC(=O)Nc4n3
1876	CHEMBL1780107	train	8.0	86.97847329636592	53.1	34.366966247558594	28.25865639299097	50.67602398422888	COC[C@H]1C[C@H](CN(Cc2nc(oc2C)N3CCOCC3)C1)C(=O)NC[C@H]4CCCO4
1877	CHEMBL3629733	train	8.0	45.08341723501445	24.0	71.13892364501953	49.410700366821125	47.408260311713775	COC1=CN(N=C(C1=O)c2ccnn2c3ccccc3)c4ccc5N(C)C(=O)C6(CCC6)c5c4F
1878	CHEMBL2386921	test	8.0	57.362571451389975	20.0	35.52313995361328	30.112424724789463	35.74953403244818	COC1=CN2C(=O)C=C(Cn3cnc4ccccc34)N=C2C=C1
1879	CHEMBL2335907	train	8.0	38.35267516402544	19.0	36.77536392211914	12.426581219740234	26.638655076471203	COc1cc(cc2cnc(Nc3ccc(cc3)[C@@H](C)NC(=O)C)nc12)c4ccncc4
1880	CHEMBL3758299	test	8.0	10.044086487947558	16.261424324324324	8.485549926757812	9.376000380235208	11.041765279816225	COc1cc(CNC(=O)c2cc(nc(C)n2)c3nnn(C[C@@H]4CO[C@@H](CO)CO4)n3)ccc1F
1881	CHEMBL3759468	train	8.0	39.076424138683755	25.0	8.847704887390137	7.388595810462918	20.078181209134204	COc1cc(CNC(=O)c2cc(nc(C)n2)c3nnn(C[C@H]4CO[C@H](CO)CO4)n3)ccc1F
1882	CHEMBL271636	train	8.0	45.47786264925096	19.670444444444374	55.38262939453125	72.08474471248128	48.153920300176964	COc1cc(F)c2ccc(NC3CCN(CC4=CC5CCCC(C4)N5C(=O)C)CC3)nc2c1
1883	CHEMBL2419595	train	8.0	15.436168979007215	21.0	6.5747785568237305	11.751775704110509	13.690680809985363	COc1cc2cc(ccc2cn1)C(=O)N3CCC4(CC3)Cc5cn(nc5C(=O)N4)C(C)(C)C
1884	CHEMBL1171140	test	8.0	21.885511228956226	22.0	26.352027893066406	27.685526292804656	24.480766353706823	COc1ccc(cc1)c2nc(O[C@@H]3C[C@@H]4N(C3)C(=O)N(C)CCCC\C=C/[C@@H]5C[C@]5(NC4=O)C(=O)NS(=O)(=O)C6CC6)c7ccc(OC)c(C)c7n2
1885	CHEMBL2375964	train	8.0	13.214940611748304	19.0	7.3452582359313965	3.674273794458157	10.808618160534465	COc1ccc(cn1)C2=Cc3c(C)nc(N)nc3N([C@@H]4CC[C@@H](CC4)OCC(=O)N)C2=O
1886	CHEMBL2375958	train	8.0	15.323571530881534	18.49039473684208	8.040664672851562	7.191983864828813	12.261653701350998	COc1ccc(cn1)C2=Cc3c(C)nc(N)nc3N([C@@H]4CC[C@H](CC4)OCC(=O)N)C2=O
1887	CHEMBL2376096	train	8.0	23.980788537498796	19.01391561181437	22.506616592407227	16.30811416626218	20.45235872699564	COc1ccc(cn1)C2=Cc3c(C)nc(N)nc3N([C@@H]4CC[C@H](CC4)OCC(=O)O)C2=O
1888	CHEMBL2181504	train	8.0	29.36966688407325	17.333333333333332	15.50822925567627	4.739150212747001	16.737594921457465	COc1ccc(cn1)c2cc(cnc2N)c3ccc(cc3)n4cncn4
1889	CHEMBL2024166	train	8.0	23.842024905333034	8.0	25.28327178955078	19.50298416704127	19.15707021548127	COc1ccc(CN2C(=O)Nc3c(N)nc(cc23)C(F)(F)F)cn1
1890	CHEMBL2048811	test	8.0	56.172714499665034	42.346871388888886	67.82463836669922	61.382432023056374	56.93166406957738	COc1ccc(OCC(=O)N2CCC3(CC2)CN(Cc4ccc(cc4)c5oc(C)nn5)C3)cc1
1891	CHEMBL1837030	train	8.0	57.934801633333336	25.125	25.643768310546875	57.545104532390326	41.562168619067634	COc1ccc2c(COCc3nnc(C4CCN(CC4)c5ccccn5)n23)c1
1892	CHEMBL2419596	train	8.0	14.98031344248365	19.331570247933875	7.814509391784668	6.141967962588524	12.067090261197679	COc1ccc2ccc(cc2n1)C(=O)N3CCC4(CC3)Cc5cn(nc5C(=O)N4)C(C)(C)C
1893	CHEMBL3914083	train	8.0	41.85731074627064	17.109308536585367	42.18501663208008	24.43542952624748	31.396766360295892	COc1cccc(C(=O)NCC2=C(C)C=C(C)NC2=O)c1Cl
1894	CHEMBL3613705	train	8.0	40.10078233921265	18.983636363636336	32.6814079284668	16.338009094946145	27.02595893156548	COc1cccc(CC(=O)N2Cc3ccc(cc3C2)S(=O)(=O)Nc4cnn(C)n4)c1
1895	CHEMBL3613708	train	8.0	43.84494993374243	20.779097715827348	46.09941101074219	50.709465821665276	40.35823112049431	COc1cccc(CC(=O)N2Cc3ccc(cc3C2)S(=O)(=O)Nc4cnn(n4)C(C)C)c1
1896	CHEMBL3613712	train	8.0	50.04949597797499	26.756953883495157	42.0215950012207	38.20376784966554	39.257953178089096	COc1cccc(CC(=O)N2Cc3ccc(cc3C2)S(=O)(=O)Nc4cnn(n4)C5CC(F)(F)C5)c1
1897	CHEMBL3613711	test	8.0	37.25786701367035	19.0	45.75031280517578	18.831864188362054	30.210011001802044	COc1cccc(CC(=O)N2Cc3ccc(cc3C2)S(=O)(=O)Nc4cnn(n4)C5CCCOC5)c1
1898	CHEMBL3613710	train	8.0	24.412520479577378	23.0	21.876188278198242	46.85900937900114	29.03692953419419	COc1cccc(CC(=O)N2Cc3ccc(cc3C2)S(=O)(=O)Nc4cnn(n4)C5COC5)c1
1899	CHEMBL3758625	train	8.0	68.7902687233086	29.0	43.86274719238281	48.68794261063145	47.58523963158072	COc1cccc(CNC(=O)c2cc(cc(C)n2)c3nnn(C[C@@H]4CC[C@H](CC4)NS(=O)(=O)C)n3)c1
1900	CHEMBL3759287	test	8.0	14.830420136280328	17.05284604761905	11.012787818908691	9.682151550195023	13.144551388250774	COc1cccc(CNC(=O)c2cc(cc(C)n2)c3nnn(C[C@H]4CO[C@H](CO)CO4)n3)c1
1901	CHEMBL3758763	train	8.0	51.736076998699026	24.391666666666666	28.627256393432617	53.955199902776144	39.677549990393615	COc1cccc(CNC(=O)c2cc(cc(C)n2)c3nnn(CC4COCCO4)n3)c1
1902	CHEMBL3758659	train	8.0	32.784610408033885	32.7	7.618805885314941	16.815610564654698	22.47975671450088	COc1cccc(CNC(=O)c2cc(nc(C)n2)c3nnn(C[C@H]4CO[C@H](CO)CO4)n3)c1
1903	CHEMBL2158775	train	8.0	48.04332017954913	28.571428571428573	45.85304641723633	26.261034808778327	37.18220749424809	COc1ccccc1C[C@H](N2CCC(CN3CCC(CC3)Oc4ccc(Cl)c(Cl)c4)CC2)C(=O)O
1904	CHEMBL3892944	train	8.0	15.204054237184273	19.0	12.019013404846191	15.947114316075236	15.542545489526425	COc1cncc(NS(=O)(=O)c2ccccc2C(F)(F)F)c1
1905	CHEMBL2375963	test	8.0	36.30335199318783	21.0022627152318	36.15882110595703	34.078522984529705	31.885739699726592	COc1ncc(cc1F)C2=Cc3c(C)nc(N)nc3N([C@@H]4CC[C@@H](CC4)OCC(=O)N)C2=O
1906	CHEMBL2375957	test	8.0	36.30335199318783	21.0022627152318	36.15882110595703	34.078522984529705	31.885739699726592	COc1ncc(cc1F)C2=Cc3c(C)nc(N)nc3N([C@@H]4CC[C@H](CC4)OCC(=O)N)C2=O
1907	CHEMBL2375968	train	8.0	33.22771545258245	19.0	41.07657241821289	82.8154874986952	44.02994384237264	COc1ncc(cc1F)C2=Cc3c(C)nc(N)nc3N([C@@H]4CC[C@H](CC4)OCO)C2=O
1908	CHEMBL2375961	train	8.0	17.717728535276752	18.49039473684208	14.18409252166748	5.718949104227001	14.027791224503328	COc1ncc(cn1)C2=Cc3c(C)nc(N)nc3N([C@@H]4CC[C@@H](CC4)OCC(=O)N)C2=O
1909	CHEMBL2375956	test	8.0	13.135118711060612	21.0	7.543416500091553	5.682399216294394	11.84023360686164	COc1ncc(cn1)C2=Cc3c(C)nc(N)nc3N([C@@H]4CC[C@H](CC4)OCC(=O)N)C2=O
1910	CHEMBL2375365	train	8.0	38.943825776284754	20.5	42.820030212402344	40.37720444587054	35.66026510863941	COc1ncc(cn1)C2=Cc3c(C)nc(N)nc3N([C@@H]4CC[C@H](CC4)OCO)C2=O
1911	CHEMBL3786005	test	8.0	18.787958857335497	22.0	17.456924438476562	6.2040653259036915	16.112237155428936	COCCOc1cnc2C=CN([C@H](C)c3nnc4ccc(cn34)c5cnn(C)c5)C(=O)c2c1
1912	CHEMBL3924161	train	8.0	56.712173371008404	16.0991515151515	54.5857048034668	11.466525171210655	34.71588871520934	FC(F)(F)c1ccc(NS(=O)(=O)c2ccccc2C(F)(F)F)cn1
1913	CHEMBL3965811	train	8.0	12.077886293784724	8.208880281690142	7.324218273162842	8.122795540354634	8.933445097248086	FC(F)(F)c1ccccc1S(=O)(=O)Nc2cccc(c2)C#N
1914	CHEMBL1080788	test	8.0	38.99061278357918	25.0	22.413110733032227	19.496105104801654	26.474957155353266	FC(F)(F)CN([C@H]1CCNC1)C(=O)c2cccc(Cl)c2Cl
1915	CHEMBL4101680	train	8.0	27.094149332457928	17.6	16.047771453857422	11.920256385947777	18.165544293065782	FC(F)(F)Oc1ccc2c(n[nH]c2c1)c3ccc(cc3)C#N
1916	CHEMBL511211	test	8.0	22.919337035375015	9.114841628959269	89.64756774902344	45.74229347152771	41.85600997122136	Fc1ccc(C2Cc3nccn3C2)c(c1)c4ccn[nH]4
1917	CHEMBL505414	train	8.0	28.783081334040943	17.0	17.985565185546875	22.779915132616797	21.637140413051153	Fc1ccc(C2Cc3nccn3C2)c(c1)c4cncnc4
1918	CHEMBL506744	train	8.0	14.11287543313963	8.0	27.71720314025879	15.631463533198756	16.365385526649295	Fc1ccc(c2cncnc2)c(c1)C3Cc4nccn4C3
1919	CHEMBL3683329	train	8.0	67.58998698084031	20.339073170731762	68.46426391601562	66.63703445761848	55.75758963130154	Fc1ccc(NS(=O)(=O)c2ccc(Oc3ccc(C#N)c(F)c3)c(c2)C#N)nc1
1920	CHEMBL3683299	test	8.0	35.65953973270688	11.199256505576189	23.687145233154297	20.07848789214993	22.656107340896824	Fc1ccc(NS(=O)(=O)c2ccc(Oc3ccc(cc3)C#N)c(c2)C#N)nc1
1921	CHEMBL3683316	test	8.0	69.40069918250481	15.929845132743369	116.82718658447266	92.35357312647027	73.62782600654778	Fc1ccc(NS(=O)(=O)c2ccc(Oc3ccc(cc3Cl)C#N)c(c2)C#N)nc1
1922	CHEMBL467259	train	8.0	34.60122878787879	10.0	26.133285522460938	12.084963951916054	20.704869565563946	Fc1cccc(c2cncnc2)c1C3Cc4nccn4C3
1923	CHEMBL2347108	train	8.0	54.97168654496905	19.0	21.14442253112793	23.525723250497897	29.66045808164872	N[C@H]1Cc2cn(nc2N(O)C1=O)c3ccccc3
1924	CHEMBL1836895	train	8.0	47.57154876972279	21.0	33.320194244384766	39.743469674968615	35.408803172269046	Nc1nc(cc2N(Cc3ccc(NCc4ccccc4)nc3)C(=O)Nc12)C(F)(F)F
1925	CHEMBL1836894	train	8.0	30.698582838141014	19.13335877862596	40.51243591308594	26.73826657568064	29.27066102638339	Nc1nc(cc2N(Cc3ccc(NCCO)nc3)C(=O)Nc12)C(F)(F)F
1926	CHEMBL1774912	test	8.0	28.9674383414169	22.5	15.5541353225708	3.0264560858668785	17.512007437463648	Nc1nc2CN(Cc2c(n1)c3c(Cl)cc(Cl)cc3OCCCC#N)C(=O)NC4CCC4
1927	CHEMBL1774906	train	8.0	69.51554851380511	23.914428571428573	54.78995132446289	52.06954555547966	50.072368491294064	Nc1nc2CN(Cc2c(n1)c3c(Cl)cc(Cl)cc3OCCCC(F)(F)F)C(=O)NCCC#N
1928	CHEMBL1774914	train	8.0	28.64548494051949	19.47692307692308	22.509485244750977	25.00499975472326	23.9092232542292	Nc1nc2CN(Cc2c(n1)c3c(Cl)cc(Cl)cc3OCCCO)C(=O)NC4CCC4
1929	CHEMBL1774930	train	8.0	14.043279436954936	22.37357798165138	9.868093490600586	8.211450345649364	13.624100313714067	Nc1nc2CN(Cc2c(n1)c3c(Cl)cc(Cl)cc3OCCn4cc(F)cn4)C(=O)NCC(F)(F)F
1930	CHEMBL1774922	train	8.0	57.38647472177665	24.0	24.024423599243164	2.4411536472034214	26.96301299205581	Nc1nc2CN(Cc2c(n1)c3c(Cl)cc(Cl)cc3OCCn4cccn4)C(=O)NC5CC5
1931	CHEMBL1774926	test	8.0	50.87460505427684	23.70947611428571	23.126630783081055	31.09583695592077	32.201637226891094	Nc1nc2CN(Cc2c(n1)c3c(Cl)cc(Cl)cc3OCCn4cccn4)C(=O)NCC(F)(F)F
1932	CHEMBL1774925	train	8.0	39.19895600914377	25.0	51.52750015258789	22.63762320041328	34.591019840536234	Nc1nc2CN(Cc2c(n1)c3c(Cl)cc(Cl)cc3OCCn4cccn4)C(=O)NCC(F)F
1933	CHEMBL1807827	train	8.0	20.584772909408024	28.0	20.182636260986328	23.04076383787995	22.952043252068577	O[C@@H](CNCCSCCCNCCc1cccc(Cl)c1)c2ccc(O)c3NC(=O)Sc23
1934	CHEMBL552513	test	8.0	56.08792117243884	18.444444444444443	54.114341735839844	41.659341887363944	42.57651231002177	O[C@@H]1CNC[C@H]1N2C=Cc3c(NC(=O)Cc4ccc(F)c(c4)C(F)(F)F)cccc3C2=O
1935	CHEMBL2207280	train	8.0	24.13911056429349	20.0	6.953056335449219	-8.587842273981764	10.626081156440236	O[C@H](CNC(=O)C1=CNC(=O)c2ccc(F)cc12)CN3CCC(CC3)Oc4ccc(Cl)c(Cl)c4
1936	CHEMBL2208435	train	8.0	62.31370872342161	24.868608695652178	51.76388931274414	40.125345734597865	44.76788811660395	O[C@H](CNC(=O)c1cnnc2ccccc12)CN3CCC(CC3)Oc4ccc(Cl)c(Cl)c4
1937	CHEMBL558853	train	8.0	8.139990428736615	19.0	7.132462978363037	7.205712675913927	10.369541520753396	O=C(N(CC1CCC1)[C@@H]2CCNC2)c3ccccc3Oc4ccccc4
1938	CHEMBL2386924	train	8.0	39.5461825260101	15.804908708010347	64.73250579833984	48.504914322869965	42.14712783880756	O=C1C=C(Cn2cnc3ccccc23)N=C4SC=C(N14)c5ccccc5
1939	CHEMBL2386927	train	8.0	46.349018434343435	25.0	52.5963249206543	32.400343130502826	39.08642162137514	O=C1C=C(Cn2cnc3ccccc23)N=C4SC=CN14
1940	CHEMBL2158840	train	8.0	55.39605783473553	16.725153846153855	36.26428985595703	19.297896470747762	31.920849501898545	OC(=O)[C@H](Cc1cccc(F)c1)N2CCC(CN3CCC(CC3)Oc4ccc(Cl)c(Cl)c4)CC2
1941	CHEMBL2158822	test	8.0	25.10506335548845	18.142857142857142	7.600234031677246	38.96560097891307	22.453438877233978	OC(=O)c1ccccc1N2CCC(CN3CCC(CC3)Oc4ccc(Cl)c(Cl)c4)CC2
1942	CHEMBL1837026	test	8.0	71.87312099506687	20.0	23.90219497680664	55.562087531852434	42.834350875931484	OC(=O)COCc1nnc(C2CCN(CC2)c3ccccn3)n1Cc4ccccc4
1943	CHEMBL4100572	train	8.0	37.81992580252882	18.0	4.118597030639648	4.92794537482458	16.216617051998263	OC1CCN(CCOc2ccc(cc2)[C@@H]3CC[C@@]4(CC3)OOC5(O4)C6CC7CC(CC5C7)C6)CC1
1944	CHEMBL2408123	train	8.0	23.65523649581516	9.0	16.893285751342773	8.795064265543713	14.585896628175412	C[C@@H](CO)Oc1cc(Oc2cnc(nc2)C(=O)N(C)C)cc(c1)C3=NC=CC(=O)N3
1945	CHEMBL2179104	train	8.0	15.871106312828596	14.190000000000001	10.332356452941895	12.825221811878684	13.304671144412294	C[C@@H]1CN(Cc2cnc(C)nc2)C[C@H]1C3=Nc4c(cnn4C5CCOCC5)C(=O)N3
1946	CHEMBL2179105	train	8.0	66.47520718092	19.0	50.0865478515625	99.81284494477927	58.84364999431544	C[C@@H]1CN(Cc2ncccn2)C[C@H]1C3=Nc4c(cnn4C5CCOCC5)C(=O)N3
1947	CHEMBL4077211	train	8.0	58.84713948712029	17.0	49.02903366088867	27.360522604099124	38.05917393802702	C[C@]1(CCSC(=N1)N)c2cc(CNC3(CC3)C#N)c(F)cc2F
1948	CHEMBL4080380	train	8.0	48.61437051894443	22.548076923076927	54.09976577758789	34.173096172599074	39.85882734805208	C[C@]1(CCSC(=N1)N)c2cc(CNC3(COC3)C(F)(F)F)c(F)cc2F
1949	CHEMBL4085715	train	8.0	20.139077746185933	8.136115730337085	9.28624153137207	9.117550607881055	11.669746403944036	C[C@]1(CCSC(=N1)N)c2cc(CNC3CC3)c(F)cc2F
1950	CHEMBL4064148	train	8.0	31.414905089574475	19.0	23.96727180480957	2.9004465931818113	19.320655871891464	C[C@]1(CCSC(=N1)N)c2cc(CNCC3CC3)c(F)cc2F
1951	CHEMBL3330655	train	8.0	32.51622840525597	18.0	19.54990005493164	27.10847571579282	24.29365104399511	C[C@H](CO)CONC(=O)c1ncc2cncn2c1Nc3ccc(I)cc3F
1952	CHEMBL3393442	train	8.0	44.94077625000002	28.0	30.06081199645996	1.9944573348055565	26.249011395316387	C1CN(CCO1)c2ncnc3[nH]cc(c4cnccn4)c23
1953	CHEMBL2178224	train	8.0	39.425771290727056	25.0	21.316362380981445	1.8941732309802233	21.909076725672183	CC(C)(C)N1C[C@@H]([C@H](C1)c2ccc(\C=C\C(=O)Nc3ccccc3N)cc2)C(=O)Nc4ccc(Cl)cc4
1954	CHEMBL1955896	train	8.0	18.536021923937323	18.345664885361547	12.651873588562012	15.537982904456078	16.26788582557924	CC(C)(C)n1cc2OC3(CCN(CC3)C(=O)c4ccc5[nH]cnc5c4)CC(=O)c2n1
1955	CHEMBL4094377	test	8.0	45.25828609952841	19.199999999999992	54.51609802246094	25.53622792183766	36.12765301095675	CC(C)(NCc1cc(c(F)cc1F)[C@]2(C)CCSC(=N2)N)C(F)(F)F
1956	CHEMBL3221407	train	8.0	109.38860714285714	26.0	102.40899658203125	122.61429880397179	90.10297563221505	CC(C)C[C@@H]1NC(=O)[C@H](Cc2ccc(O)cc2)N(C)C(=O)[C@H]3CCCN3C(=O)[C@H](CC(C)C)NC(=O)[C@H](CC(=O)O)N(C)C(=O)[C@@H](CC(C)C)N(C)C1=O
1957	CHEMBL3221396	test	8.0	36.16517028083028	9.0	46.66215515136719	15.662129972163187	26.872363851090164	CC(C)C[C@@H]1NC(=O)[C@H](Cc2ccc(O)cc2)N(C)C(=O)[C@H]3CCCN3C(=O)[C@H](CC(C)C)NC(=O)[C@H](CCCCN)N(C)C(=O)[C@@H](CC(C)C)N(C)C1=O
1958	CHEMBL3221399	train	8.0	61.855887619047614	15.840194690265504	56.544795989990234	63.78096798639321	49.505461571424135	CC(C)C[C@@H]1NC(=O)[C@H](Cc2ccc(O)cc2)N(C)C(=O)[C@H]3CCCN3C(=O)[C@H](CC(C)C)NC(=O)[C@H](CCN4CCCCC4)N(C)C(=O)[C@@H](CC(C)C)N(C)C1=O
1959	CHEMBL1818338	train	8.0	47.92227478179985	19.367611940298517	51.01587677001953	7.494290392943534	31.45001347126536	CC(C)CNCc1ccc(cc1)c2ccccc2S(=O)(=O)NC(C)C
1960	CHEMBL1818230	train	8.0	14.361922901005482	12.5	14.078307151794434	17.39204874667185	14.583069699867941	CC(C)CNCc1ccc(cc1)c2cccnc2S(=O)(=O)N3CCCC3
1961	CHEMBL1818225	train	8.0	26.323838096421145	20.0	24.869762420654297	18.04639552847822	22.309999011388413	CC(C)CNCc1ccc(cc1)c2ncccc2S(=O)(=O)N3CCCC3
1962	CHEMBL1269257	train	8.0	127.29047464772935	74.0	120.98481750488281	68.31312815988652	97.64710507812467	CC(C)N(C(=O)CN1C(=O)[C@H](NC(=O)Nc2cccc(c2)C(=O)O)C(=O)N(c3ccccc3)c4ccccc14)c5ccccc5
1963	CHEMBL1269259	train	8.0	70.4048515475439	33.3	57.543975830078125	75.1040217285703	59.088212276548084	CC(C)N(C(=O)CN1C(=O)C(Nc2cccc(c2)C(=O)O)c3nnc(c4ccccc4)n3c5ccccc15)c6ccccc6
1964	CHEMBL1958371	test	8.0	24.609151465570516	10.384102848101266	28.0507755279541	69.84996170350425	33.22349788628253	CC(C)n1cc2OC3(CCN(CC3)C(=O)c4cc(C)c5[nH]nc(C)c5c4)CC(=O)c2n1
1965	CHEMBL2178211	train	8.0	48.95030610282085	21.0	52.35394287109375	49.49585624410169	42.95002630450408	CC(C)NC(=O)[C@H]1CN(C)C[C@@H]1c2ccc(\C=C\C(=O)Nc3ccccc3N)cc2
1966	CHEMBL2408133	train	8.0	35.19902967560565	16.254999999999995	10.45809555053711	8.17573059215638	17.521963954574783	CC(C)Oc1cc(Oc2ccc(cc2)S(=O)(=O)C)cc(c1)C3=CC=CC(=O)N3
1967	CHEMBL2408111	test	8.0	44.954906977977174	18.0	43.19437026977539	45.75599337113169	37.976317654721065	CC(C)Oc1cc(Oc2ccc(cc2)S(=O)(=O)C)cc(c1)C3=NC(=CC(=O)N3)C
1968	CHEMBL2408110	test	8.0	11.296484869254034	14.849024390243901	29.808015823364258	21.90543879865158	19.464740970378443	CC(C)Oc1cc(Oc2ccc(cc2)S(=O)(=O)C)cc(c1)C3=NC=C(C)C(=O)N3
1969	CHEMBL2408115	train	8.0	30.48496993606362	20.199799056603766	34.10072326660156	22.874098841647722	26.914897775229168	CC(C)Oc1cc(Oc2ccc(cc2)S(=O)(=O)C)cc(c1)C3=NC=C(Cl)C(=O)N3
1970	CHEMBL2408120	train	8.0	22.028543315381615	22.4	27.978723526000977	42.62963842533088	28.75922631667837	CC(C)Oc1cc(Oc2cnc(cn2)C(=O)N(C)C)cc(c1)C3=NC=CC(=O)N3
1971	CHEMBL2408127	test	8.0	34.47357537973665	17.338584474885828	13.753934860229492	15.569637673168012	20.283933097004997	CC(C)Oc1cc(Oc2cnc(nc2)C(=O)N(C)C)cc(c1)C3=NC=C(C)C(=O)N3
1972	CHEMBL2408119	test	8.0	9.36950814445638	18.0	7.060811519622803	11.164205959763361	11.398631405960636	CC(C)Oc1cc(Oc2cnc(nc2)C(=O)N(C)C)cc(c1)C3=NC=CC(=O)N3
1973	CHEMBL1783748	train	8.0	44.02228498108167	26.961106563876662	67.64274597167969	17.61871790830079	39.0612138562347	CC(C)S(=O)(=O)C1=CC(=O)N(C=C1)[C@@H](CC2CCC(F)(F)CC2)C(=O)Nc3ccc(C)cn3
1974	CHEMBL2180065	test	8.0	27.830150197503254	21.66846438202245	22.473390579223633	18.63330038309714	22.65132638546162	CC(N1CC(C1)Oc2ccc(C#N)c(F)c2)C3=Nc4c(cnn4C5CCOCC5)C(=O)N3
1975	CHEMBL2177497	train	8.0	32.121970717108454	19.55652173913044	6.0650200843811035	34.50690712582995	23.062604916612486	CC(N1CC(C1)Oc2ccc(cc2)C#N)C3=Nc4c(cnn4C5CCOCC5)C(=O)N3
1976	CHEMBL4067722	test	8.0	21.234035645999423	19.100000000000016	101.15691375732422	17.26827127430043	39.68980516940603	Cc1cc2CN([C@H]3CCOC[C@@H]3O)C(=O)c2cc1Cc4ccc(cc4)c5cocn5
1977	CHEMBL4094233	train	8.0	13.89524100862805	9.597005517241378	11.126188278198242	19.30014235716952	13.479644290309297	Cc1cc2CN([C@H]3CCOC[C@@H]3O)C(=O)c2cc1Cc4ccc(cc4)n5cccn5
1978	CHEMBL4067692	train	8.0	11.689563264980572	20.451768888888896	8.399354934692383	11.419240967194227	12.98998201393902	Cc1cc2CN([C@H]3CCOC[C@@H]3O)C(=O)c2cc1Cc4ccc(cc4)n5ccnc5
1979	CHEMBL3605998	test	8.0	38.216997659948376	18.535699334565557	12.444960594177246	18.700528149490914	21.974546434545523	Cc1ccc(CN2CCC(CC2)N3Cc4cccc(C(=O)N)c4C3=O)cc1
1980	CHEMBL2012944	train	8.0	26.958593607793826	8.0	13.278748512268066	20.11328553041599	17.087656912619472	Cc1ccc2c(c1)nc(C)n2c3ccc(s3)C(=O)NC4CC4
1981	CHEMBL1081505	train	8.0	10.242134153667187	18.0	6.570159435272217	11.727869380842893	11.635040742445575	Cc1cccc(C)c1CNc2cccc3c2nc(C)n3C
1982	CHEMBL3122216	train	8.0	42.298644337737805	20.0	46.367591857910156	65.31986211752688	43.496524578293716	Cc1ccnnc1c2nn(C)c3nc(OCc4ccccn4)cnc23
1983	CHEMBL2204649	train	8.0	30.387419643348693	17.166666666666668	26.246789932250977	12.745499516956922	21.636593939805817	Cc1cnc(NC(=O)c2cc(Oc3ccc(cc3)S(=O)(=O)C)c4cn(C)nc4c2)cn1
1984	CHEMBL2204661	train	8.0	33.557400639612226	21.0	17.363433837890625	17.862409118587827	22.445810899022668	Cc1cnc(NC(=O)c2cc(Oc3ccc(cc3)S(=O)(=O)C)c4cn(nc4c2)C5CC5)cn1
1985	CHEMBL2204651	train	8.0	22.843322968250163	20.45	20.798246383666992	9.830804566255583	18.480593479543185	Cc1cnc(NC(=O)c2cc(Oc3ccc(cc3)S(=O)(=O)C4CC4)c5cn(C)nc5c2)cn1
1986	CHEMBL2204656	train	8.0	31.63754621210368	19.26378723404253	22.5063533782959	14.538281163199287	21.98649199691035	Cc1cnc(NC(=O)c2cc(Oc3cnc(C(=O)N4CCC4)c(F)c3)c5cn(C)nc5c2)cn1
1987	CHEMBL2393166	train	8.0	22.64960679264969	21.203347169811344	16.1693058013916	20.887648042093705	20.227476951486583	CC1CNCCN(C1)S(=O)(=O)c2ccc(NC(=O)NCc3cccnc3)cc2
1988	CHEMBL47529	test	8.0	82.5731765572264	23.0	51.504295349121094	61.97501335694017	54.76312131582192	Cc1nc2c(OCc3ccccc3)cccn2c1CC#N
1989	CHEMBL2012949	train	8.0	31.68082996780186	17.666666666666668	14.67210578918457	42.38522047510217	26.601205724688818	Cc1nc2ccc(cc2n1c3ccc(s3)C(=O)NC4CC4)C(F)(F)F
1990	CHEMBL3218493	train	8.0	29.96521879199993	22.9875	27.37363624572754	24.35786463451026	26.171054918059433	Cc1oc2cc(cc(Oc3cnc(cn3)C(=O)N4CC(C)(O)C4)c2c1)C(=O)Nc5cnccn5
1991	CHEMBL2408112	train	8.0	48.00734071572451	18.514103114406797	59.840396881103516	27.475720794188362	38.4593903763558	CCC1=CN=C(NC1=O)c2cc(OC(C)C)cc(Oc3ccc(cc3)S(=O)(=O)C)c2
1992	CHEMBL2204659	train	8.0	18.28375070801088	8.0	16.381832122802734	38.34016860572217	20.251437859133947	CCCn1cc2c(Oc3ccc(cc3)S(=O)(=O)C)cc(cc2n1)C(=O)Nc4cnc(C)cn4
1993	CHEMBL3218485	train	8.0	22.46240323854006	19.313162666666656	13.501572608947754	21.540918160345615	19.20451416862502	CCN(C)C(=O)c1cnc(Oc2cc(cc3oc(C)cc23)C(=O)Nc4cnc(C)cn4)cn1
1994	CHEMBL3122224	test	8.0	14.140470458533796	18.2	26.20263671875	19.893651043409136	19.60918955517323	CCN(CC)C(=O)c1nn(C)c2nc(OCc3ccccn3)ccc12
1995	CHEMBL3122206	train	8.0	39.816150553622386	24.0	30.788537979125977	48.66142499264274	35.81652838134777	CCN(CC)C(=O)c1nn(C)c2nc(OCc3ccccn3)cnc12
1996	CHEMBL3127504	train	8.0	33.09630075199328	22.0	26.399173736572266	59.62308380247476	35.279639572760075	CCn1cc(cn1)S(=O)(=O)c2ccc(NC(=O)[C@@H]3C[C@H]3c4cccnc4)cc2
1997	CHEMBL2204658	train	8.0	12.75352720874674	8.0	12.281310081481934	7.106402664272948	10.035309988625405	CCn1cc2c(Oc3ccc(cc3)S(=O)(=O)C)cc(cc2n1)C(=O)Nc4cnc(C)cn4
1998	CHEMBL2204663	train	8.0	35.46318439349308	22.015418994413412	31.365076065063477	19.52172000735902	27.091349865082247	CCn1cc2c(Oc3cnc(C(=O)N4CCC4)c(F)c3)cc(cc2n1)C(=O)Nc5cnc(C)cn5
1999	CHEMBL4061944	train	8.0	36.58362366747907	9.0	5.222527980804443	15.135189257889785	16.485335226543324	CCNCc1cc(c(F)cc1F)[C@]2(C)CCSC(=N2)N
[truncated: 5,883 more rows]

## Sheet: Descriptors
ID	Set	ALogP	ALogp2	AMR	apol	naAromAtom	nAromBond	nAtom	nHeavyAtom	nH	nB	nC	nN	nO	nS	nP	nF	nCl	nBr	nI	nX	ATS0m	ATS1m	ATS2m	ATS3m	ATS4m	ATS5m	ATS6m	ATS7m	ATS8m	ATS0v	ATS1v	ATS2v	ATS3v	ATS4v	ATS5v	ATS6v	ATS7v	ATS8v	ATS0e	ATS1e	ATS2e	ATS3e	ATS4e	ATS5e	ATS6e	ATS7e	ATS8e	ATS0p
2773	train	11.99739629	0.0	0.0	0.0	1.452	0.05007	0.4	12.0	10.0	6.0	0.3125	2.132840025	3.946439345	4.346439345	4.546439345	4.546439345	85.31360099	157.8575738	0.816703884	3.18908807	1.37548875	0.774116466	0.809737185	0.809737185	27.42185268	49.48944021	49.69100522	47.56411788	47.56411788	7.847750865	1.078808949	3.640312149	51.0	130.0	153.0	173.0	188.0	5.796057751	6.102558595	6.426488457	6.690842277	7.206377291	3.921133231	3.0	0.0	0.0	0.0	0.0
7563	train	11.98821413	0.0	0.0	0.0	0.77707	0.021	0.538461538	8.0	7.0	8.0	0.24137931	1.514719172	3.821176945	5.64152339	5.837752428	5.868521659	98.45674617	248.3765014	0.93676168	4.507648641	2.201190868	0.884939372	0.915720207	0.920546723	13.67635875	44.88371307	45.41969837	24.83206223	24.70829707	12.66877334	0.0	0.0	59.0	136.0	148.0	174.0	204.0	6.077642243	6.315358002	6.717804695	7.092573716	7.752335163	5.102960969	6.0	0.0	0.0	0.0	0.0
5160	train	11.9	0.0	0.0	0.0	1.33603	0.0393	0.46031746	5.0	4.0	5.0	0.384615385	1.598743907	3.576465546	5.013637902	5.140622029	5.140622029	100.7208661	225.3173294	0.838782518	4.378536016	2.400814378	0.804909912	0.825296462	0.825296462	19.21037105	43.57072226	44.04765797	28.98501511	29.61632938	12.02990388	2.46377866	2.933810221	53.0	121.0	140.0	165.0	197.0	5.913503006	6.249975242	6.634633358	7.014814351	7.608374474	4.97260274	5.0	0.0	0.0	0.0	1.0
3764	train	11.99611121	0.0	0.0	0.0	0.73693	0.01939	0.457142857	7.0	6.0	7.0	0.344827586	1.455144073	3.621097219	5.250571945	5.479143374	5.479143374	101.8600851	253.4768053	0.856637217	4.674138944	2.508185798	0.817048806	0.852617124	0.852617124	13.16707327	41.96746425	42.5118864	30.31255512	30.31255512	13.77535191	3.357680026	2.376614404	59.0	123.0	120.0	126.0	131.0	5.96870756	6.133398043	6.434546519	6.739336627	7.409136444	5.128136201	4.0	3.0	3.0	0.0	6.0
4904	train	11.99853881	0.0	0.0	0.0	0.62702	0.0285	0.527777778	5.0	4.0	5.0	0.1875	1.689286976	3.638830127	4.794653474	4.850209029	4.850209029	60.81433114	130.9978846	0.927412578	3.480638025	1.531094874	0.863187826	0.873189566	0.873189566	18.59420409	44.15334767	44.20933795	24.37159653	24.37159653	0.333333333	0.0	0.0	124.0	3.526360525	4.094344562	4.634728988	5.170483995	4.405561993	0.454545455	4.0	0.0	2.0	0.0	0.0	0.0	2.0	0.0	0.0
7534	train	11.99664399	0.0	0.0	0.0	0.81565	0.02719	0.519230769	8.0	7.0	7.0	0.318181818	1.665350647	3.837735798	4.95515342	5.108999574	5.185922651	86.59823365	199.5622615	0.869258104	4.035089071	1.86270392	0.822791562	0.848337354	0.86111025	16.35298489	42.19394789	43.19454981	27.37799654	27.09334733	9.0944	1.815180854	0.986274048	50.0	113.0	121.0	148.0	178.0	5.789960171	6.018593214	6.440946541	6.81014245	7.44132039	4.621990369	5.0	0.0	0.0	0.0	0.0
404	train	11.85	0.0	0.0	0.0	129.06	5.0	5.0	1.0	1.0	0.421052632	4.797995053	5.178508855	5.178508855	75.32565229	173.4719163	230.3037625	248.568425	248.568425	4.015678078	0.406453646	0.406453646	16.97666512	36.50903141	40.87954216	41.2630335	83.30496944	37.01619452	9.273922571	5.258488004	16.0	9.404768984	17.2328316	73.0	82.0	83.0	88.0	665.0	6.033086222	6.280395839	6.552507887	7.924795914	0.466666667	0.0	0.0	3.0	0.0	3.0	0.0
1458	train	11.9	0.0	0.0	0.0	0.81567	0.02205	0.408450704	8.0	6.0	8.0	0.379310345	1.503899437	3.560233563	5.401586338	5.536933387	5.508764373	106.77686	252.776583	0.878342838	4.645847683	2.589513557	0.842761253	0.863878244	0.859483284	13.85734037	41.82072671	41.64749412	28.41801595	28.07155132	13.10939358	4.447496465	5.29911077	58.0	158.0	185.0	227.0	271.0	6.049733455	6.318968114	6.685860947	7.036148494	7.589335823	3.859332239	5.0	0.0	0.0	0.0	0.0
2328	train	11.98832487	0.0	0.0	0.0	1.39522	0.03171	0.239130435	12.0	10.0	12.0	0.5625	1.522711956	3.743281809	5.827484782	5.914441304	5.914441304	140.0894999	344.3819265	0.89329799	5.00085	2.780280147	0.873368301	0.886400522	0.886400522	14.50761714	42.52467753	42.85127481	27.36140648	27.36140648	3.177868553	0.0	0.0	145.0	4.007333185	4.454347296	4.836281907	5.18178355	2.800546448	0.5	2.0	0.0	0.0	0.0	0.0	0.0	1.0	0.0	0.0
3585	train	11.9882485	0.0	0.0	0.0	322.1	9.0	10.0	2.0	3.0	0.291666667	5.211260736	5.349191771	5.38367453	98.03321323	238.9022939	302.2531227	310.2531227	312.2531227	4.167753181	0.508789224	0.474306466	16.60596742	40.00344582	44.79189914	45.30995	110.1267678	43.89759321	11.17090909	5.495844875	19.0	8.184740614	23.99923411	131.0	178.0	189.0	206.0	1320.0	6.842683282	7.035268599	7.319202459	8.66077392	0.5	0.0	2.0	3.0	0.0	6.0	0.0
2245	train	11.85	0.0	0.0	0.0	1.34842	0.03548	0.402985075	11.0	11.0	8.0	0.44	1.915383682	3.819873992	5.106915123	5.226318108	5.345721093	128.3307067	255.9315575	0.841879333	4.150705509	2.246215199	0.807809745	0.82669686	0.845583976	27.86906852	51.36002393	52.1366105	38.51338885	37.52659998	13.32	3.161136432	2.724384117	60.0	121.0	128.0	122.0	134.0	5.888877958	6.104793232	6.267200549	6.492239835	6.65544035	3.74386921	4.0	0.0	0.0	0.0	0.0
266	train	11.85	0.0	0.0	0.0	261.07	6.0	7.0	3.0	3.0	0.586206897	4.964389684	5.395375046	5.395375046	111.5741434	268.477963	377.293616	410.0485035	410.0485035	4.77984668	0.852552467	0.852552467	13.93908637	33.40922519	37.92497694	39.04705261	120.8026424	50.56098538	12.02734839	7.785306122	7.0	12.38632329	25.47401103	117.0	175.0	195.0	187.0	1256.0	6.270988432	6.453624999	6.434546519	8.087640288	0.5	0.0	0.0	3.0	0.0	5.0	0.0
6121	train	11.89	0.0	0.0	0.0	1.33839	0.03936	0.403508772	7.0	6.0	7.0	0.208333333	1.818224882	3.932824005	5.130449663	5.095361944	5.130449663	103.6388183	224.1709683	0.879572502	4.014665132	1.900066009	0.828852193	0.823183581	0.828852193	23.18039434	50.45679554	50.0357429	34.71698848	33.91006426	10.7755102	4.974681413	5.212260239	56.0	115.0	129.0	146.0	162.0	6.077642243	6.376726948	6.775366091	7.105786129	7.786967003	6.379423868	4.0	0.0	0.0	0.0	0.0
2697	train	11.9973826	0.0	0.0	0.0	1.07122	0.03456	0.489361702	10.0	10.0	7.0	0.210526316	2.060537836	4.024458065	5.139487256	5.224593639	5.224593639	96.84527827	189.1495291	0.925268709	3.494051016	1.530130786	0.870083367	0.88449135	0.88449135	26.26932127	52.32646812	52.87999259	34.16874437	34.16874437	9.70011534	1.602689331	1.44252864	51.0	109.0	126.0	152.0	165.0	5.82008293	6.126869184	6.508769137	6.720220155	7.324489979	4.53986711	4.0	0.0	0.0	0.0	0.0
1335	train	11.89	0.0	0.0	0.0	240.09	8.0	8.0	2.0	2.0	0.25	4.484835387	4.99365747	5.160324137	96.34088871	225.9965393	269.0901232	299.6194482	309.6194482	4.301209117	0.913233125	0.746566459	16.65366156	35.9167274	40.90155025	43.61278888	110.2216644	54.5592137	10.94766821	6.41568278	26.0	7.653726807	18.39847898	104.0	132.0	144.0	140.0	1035.0	6.672032945	6.942156706	7.077498054	8.498825534	0.470588235	0.0	2.0	2.0	0.0	4.0	0.0
2379	train	11.85	0.0	0.0	0.0	0.23937	0.01596	0.517241379	2.0	2.0	2.0	0.307692308	1.292164263	3.176225825	4.349191771	4.513153409	4.513153409	37.47276361	92.11054893	0.89526735	3.565816733	1.68175517	0.841248523	0.872963033	0.872963033	10.46370647	31.9168139	32.08205854	19.7277795	19.7277795	4.472589792	0.0	0.0	23.0	47.0	47.0	53.0	54.0	4.844187086	4.852030264	5.187385806	5.411646052	5.746203191	3.542579075	3.0	0.0	0.0	0.0	0.0
145	train	11.89	0.0	0.0	0.0	0.73297	0.02364	0.321428571	6.0	5.0	6.0	0.304347826	1.697741891	3.796580655	5.458966083	5.494680368	5.494680368	95.0735459	212.6085167	0.940009033	4.109613031	2.010774267	0.899915236	0.905802766	0.905802766	20.54679287	47.36484623	47.40083998	26.3749583	26.3749583	12.45925926	3.805702776	3.006568063	45.0	95.0	102.0	114.0	128.0	5.733341277	5.934894196	6.280395839	6.637258031	7.180069874	4.942946058	810.0	3.0	2.0	0.0	3.0
4396	train	11.9	0.0	0.0	0.0	0.67754	0.01993	0.388888889	8.0	7.0	8.0	0.576923077	1.459613152	3.338870719	5.3329158	5.398955904	5.398955904	105.0921469	240.3986918	0.864340458	4.71031185	2.831054283	0.838831644	0.849219306	0.849219306	13.33857582	37.8944041	37.96096097	27.74741112	27.74741112	14.07413578	3.662758113	2.801873806	49.0	97.0	100.0	118.0	129.0	5.480638923	5.572154032	5.857933154	6.003887067	6.49375384	2.801783944	4.0	0.0	0.0	0.0	0.0
6272	train	11.85	0.0	0.0	0.0	0.76686	0.02556	0.464285714	7.0	6.0	7.0	0.523809524	1.714408743	3.709756525	5.164497779	5.164497779	5.200212065	96.00688958	207.7463654	0.889302935	4.09294618	2.097598397	0.8575527	0.8575527	0.863482973	20.31569517	43.84946736	44.66978352	30.2356733	29.41981153	10.74480151	0.0	0.0	46.0	79.0	75.0	76.0	80.0	5.159055299	5.153291594	5.147494477	5.257495372	5.38907173	2.096774194	4.0	1.0	0.0	0.0	0.0
2985	train	11.98822677	0.0	0.0	0.0	0.90338	0.02509	0.484848485	9.0	8.0	9.0	0.37037037	1.561767711	3.654266227	5.404020445	5.574400937	5.574400937	103.0766689	241.181571	0.894054944	4.482626408	2.390127892	0.852389322	0.879263852	0.879263852	14.49747008	43.21893414	43.26492278	27.36366261	26.30965397	12.90178571	4.85307534	5.432901282	56.0	115.0	123.0	145.0	167.0	5.713732806	5.796057751	6.070737728	6.315358002	6.747586527	2.956972112	5.0	0.0	0.0	0.0	0.0
6139	train	11.85	0.0	0.0	0.0	0.82034	0.03155	0.391304348	6.0	6.0	6.0	0.277777778	1.806018762	3.75493768	5.055958152	5.099436412	5.099436412	83.07686305	172.7271333	0.915343793	3.717543194	1.768624276	0.866801558	0.874255541	0.874255541	22.62627913	45.60060933	45.64442781	28.16104974	28.16104974	8.566329566	3.352934074	3.452414733	41.0	86.0	95.0	101.0	106.0	5.683579767	5.913503006	6.161207322	6.335054251	6.514712691	4.236842105	3.0	0.0	0.0	0.0	0.0
2662	train	11.98816237	0.0	0.0	0.0	268.005737529407	9.818008869869763	8.930578656434728	7.0	7.0	0.375	5.170235115	5.908070757	6.097027338	169.3394081	339.6280202741564	477.0440052351726	461.1735610945403	381.1263110959725	5.072176179	0.792368961	0.60341238	15.48218333	36.31653967	44.2354755	47.17147447	98.45966180516378	63.19669865316337	22.38076364	11.72766446	13.0	0.0	0.0	195.0	315.0	359.0	416.0	803.870809008809	7.162397497	7.428927195	7.755338813	9.011157458	0.48	0.0	2.0	5.0	0.0	8.0	0.0
1212	train	0.374001612	9.814601693	11.62273905	12.53135031	0.09547483114211773	0.02981322834511278	0.04399956696947772	7.0	6.0	2.082458966215647	0.7335215605607771	1.500286062589413	2.152628420548873	1.619020687773961	4.486024222948489	0.441653434709139	12.30924954079375	18.33642424717455	0.5240620325104429	1.803447293034637	1.027439309986473	0.6826866654845221	0.07069830813186566	0.2778194768422413	18.45718749653492	13.41256829160909	30.63094384265753	8.414407208316184	1.147820064537668	2.224641481549564	0.3478303415312688	0.1911666240672814	49.0	0.0	0.0	0.0	0.0	3.441195209960981	0.0	4.955107560312467	0.0	0.0	1.114376295614481	4.0	0.0	0.0	0.0	0.0
1601	train	11.85	0.0	0.0	0.0	1.04402	0.0261	0.37037037	9.0	7.0	8.0	0.516129032	1.51578219	3.589549394	5.3829392	5.50639599	5.50639599	122.7783574	290.753501	0.849064126	4.824067813	2.750300608	0.821247423	0.840082592	0.840082592	14.35555877	40.32458925	40.44901209	30.67350063	30.67350063	14.6503642	3.156335456	3.278179485	62.0	140.0	161.0	197.0	244.0	5.843544417	6.107022888	6.456769656	6.836259277	7.498315871	3.480093677	5.0	0.0	0.0	0.0	0.0
4734	train	11.89	0.0	0.0	0.0	1.08589	0.03103	0.46031746	9.0	7.0	9.0	0.269230769	1.579152416	3.71428905	5.119516431	5.183008495	5.183008495	99.48660218	234.0002102	0.856496014	4.398127508	2.262990873	0.814508961	0.824610473	0.824610473	14.71698149	42.28440895	42.47522053	31.02056201	30.38924774	11.39612188	5.315493352	5.596641222	57.0	122.0	139.0	153.0	166.0	5.929589143	6.224558429	6.533788838	6.80682936	7.22329568	4.492454329	5.0	0.0	0.0	0.0	0.0
2359	train	11.85	0.0	0.0	0.0	240.07	6.0	7.0	1.0	1.0	0.230769231	4.640537752	5.322989659	5.518070592	93.14329956	210.9311236	273.7917274	314.0563899	325.5661649	4.303943057	0.55965339	0.364572458	15.2262947	33.874923	40.21462818	42.90614242	105.5477428	60.15480435	12.80799667	7.03125	16.0	18.55633842	29.00402454	105.0	158.0	173.0	192.0	1142.0	6.873163834	7.145196135	7.507690078	8.695004593	0.5	0.0	1.0	3.0	0.0	5.0	0.0
5995	train	11.9	0.0	0.0	0.0	1.1626	0.02981	0.423076923	9.0	7.0	7.0	0.6	1.5553119	3.425228066	5.384573212	5.445533309	5.445533309	121.3143282	267.1677891	0.856679179	4.730090319	2.860174153	0.829435468	0.838825714	0.838825714	15.16642292	40.39821559	40.4596527	31.52988294	31.52988294	13.53329865	3.29526767	3.791505068	62.0	123.0	128.0	151.0	164.0	5.541263545	5.529429088	5.723585102	5.866468057	6.180016654	1.956656347	5.0	0.0	0.0	0.0	0.0
6579	train	11.85	0.0	0.0	0.0	0.78428	0.04128	0.323529412	4.0	3.0	4.0	0.461538462	1.678453199	3.548686067	4.432619826	4.373796297	4.432619826	57.06740876	120.6553263	0.871282988	3.409009642	1.538776774	0.827359179	0.816379625	0.827359179	19.29527502	40.30322508	39.59734272	26.25570685	25.16601408	5.413111342	2.17254461	5.448879925	31.0	59.0	58.0	58.0	60.0	5.068904202	5.278114659	5.529429088	5.758901774	5.361292166	3.450413223	2.0	0.0	0.0	0.0	0.0
360	train	11.85	0.0	0.0	0.0	0.90988	0.02843	0.45	7.0	6.0	7.0	0.333333333	1.61689184	3.611080496	5.235812887	5.367481796	5.367481796	97.0135104	216.6648298	0.8863907	4.289998756	2.295810099	0.843200291	0.864404881	0.864404881	17.11365417	42.24198886	42.37468808	28.88889115	28.23774272	11.16	3.957104468	2.97247346	50.0	104.0	114.0	120.0	134.0	5.749392986	6.033086222	6.208590026	6.445719819	7.056175284	4.14245283	4.0	0.0	0.0	0.0	0.0
6	train	11.98823372	0.0	0.0	0.0	233.06	6.0	6.0	1.0	1.0	0.423076923	4.777114648	5.370864648	5.484069531	91.78856733	219.958075	305.7353375	343.7353375	350.98045	4.565803635	0.629135352	0.515930469	12.8392428	31.69476801	37.57369253	39.20260505	107.8596329	52.17243321	12.109375	7.014243483	11.0	15.32267005	24.78072024	96.0	119.0	134.0	146.0	957.0	6.056784013	6.320768294	6.415096959	7.974532844	0.470588235	0.0	1.0	3.0	0.0	4.0	0.0
5078	train	11.98828433	0.0	0.0	0.0	0.78038	0.02787	0.480769231	8.0	8.0	7.0	0.45	1.54410998	3.619278223	4.940636353	4.940636353	4.940636353	80.29371897	188.2024676	0.866711446	4.156329738	2.081161495	0.826569345	0.826569345	0.826569345	14.41745281	39.75537787	39.75537787	27.57300835	27.57300835	8.262562245	2.760105294	2.940367105	47.0	103.0	113.0	130.0	153.0	5.746203191	6.011267174	6.343880434	6.680854679	7.311218384	4.506726457	5.0	1.0	0.0	0.0	0.0
2946	train	11.9	0.0	0.0	0.0	0.64055	0.02135	0.482758621	5.0	4.0	5.0	0.36	1.397595779	3.276482021	5.004364185	5.155310521	5.155310521	81.06055516	190.0359572	0.854281396	4.460385217	2.581498975	0.813751214	0.838296343	0.838296343	12.13236973	38.04626787	38.19839536	27.41368076	27.41368076	9.868055556	2.702694233	2.693943693	48.0	108.0	121.0	146.0	169.0	5.82008293	6.12905021	6.535241271	6.892641641	7.437795122	5.016778523	5.0	1.0	0.0	0.0	0.0
49	train	11.97985924	0.0	0.0	0.0	0.5377	0.02444	0.555555556	5.0	4.0	5.0	0.117647059	1.536873968	3.453523614	4.926733682	4.982289237	4.982289237	55.32746284	124.3268501	0.952960378	3.633051034	1.716401387	0.882142661	0.892090007	0.892090007	13.89707829	41.41829171	41.47428199	22.47009271	22.47009271	6.481481481	1.805167768	1.721584126	36.0	84.0	87.0	101.0	113.0	5.669880923	5.891644212	6.270988432	6.577861358	7.016609684	5.162291169	4.0	0.0	0.0	0.0	0.0
3753	train	11.85	0.0	0.0	0.0	1.03869	0.03148	0.37704918	6.0	5.0	5.0	0.259259259	1.508724422	3.399126924	4.987313157	5.175997993	5.175997993	92.03218971	207.3467423	0.840926326	4.422012916	2.531610414	0.80068363	0.830975864	0.830975864	14.19093103	40.39743682	40.9479973	29.98692051	29.98692051	11.37278107	6.024111608	6.075289654	52.0	106.0	114.0	137.0	161.0	5.866468057	6.054439346	6.480044562	6.881411304	7.515889085	5.202422145	4.0	0.0	0.0	0.0	0.0
5555	train	11.85	0.0	0.0	0.0	0.69945	0.02498	0.454545455	3.0	3.0	3.0	0.4	1.299934853	3.228982963	5.01772335	5.272268804	5.454086986	71.49641694	177.594063	0.867914055	4.48142486	2.552376751	0.827175993	0.869138029	0.899110912	10.96535208	36.46140373	38.31680282	23.76525547	22.26066214	8.262562245	0.0	0.0	47.0	125.0	150.0	185.0	218.0	5.669880923	5.863631176	6.242223265	6.599870499	7.260522598	3.209427609	5.0	0.0	1.0	2.0	0.0
2736	train	11.98839595	0.0	0.0	0.0	0.80567	0.02877	0.450980392	6.0	5.0	6.0	0.227272727	1.481071203	3.563256099	5.064198871	5.103414557	5.18184593	75.53463137	181.726061	0.892774883	4.191354139	2.109169243	0.844033145	0.850569093	0.863640988	13.17994572	40.46367179	40.50319434	25.31780513	24.72507022	9.013333333	5.866953345	8.423668792	45.0	101.0	113.0	134.0	161.0	5.796057751	6.063785209	6.424869024	6.835184586	7.362010551	4.962432916	4.0	0.0	0.0	0.0	0.0
5716	train	11.99617785	0.0	0.0	0.0	0.76804	0.03657	0.317073171	5.0	5.0	5.0	0.375	1.493196836	3.580464106	4.619389504	4.668169992	4.668169992	61.22107029	146.7990284	0.862220189	3.864355168	1.777087898	0.822729871	0.831417851	0.831417851	13.54347128	35.85209821	35.9012604	23.42274147	23.42274147	5.893877551	3.538403836	3.878991484	35.0	94.0	108.0	118.0	126.0	5.777652323	6.169610732	6.575075841	6.959398512	7.236339343	6.59375	286.0	3.0	2.0	1.0	6.0
2375	train	0.0	9.468155845	11.29149295	12.20823531	0.100420405101861	0.02899154427493972	0.04303840447875208	7.0	6.0	2.088333777711447	0.7314940043219924	1.50035733736681	2.153011800742158	1.616905470669146	4.242988236883019	0.2842176877542472	12.28285305278917	18.33193170716552	0.5240595951201463	1.799003797084172	1.027050304700992	0.5143867575396198	0.07196904644713512	0.2825345197073026	18.54816836858388	13.40928923195508	30.64417714609689	8.41637744235677	1.156749606490076	2.223523012387474	0.3472386755098169	0.1911667991762422	49.0	0.0	0.0	0.0	0.0	3.400434902901809	0.0	4.955100890773059	0.0	0.0	1.114991074268805	4.0	0.0	0.0	0.0	0.0
2308	train	11.9	0.0	0.0	0.0	0.94785	0.03268	0.442307692	5.0	5.0	5.0	0.347826087	1.453595247	3.73163594	4.940636353	4.979097891	4.979097891	75.58695283	194.0450689	0.866711446	4.246844471	1.968803778	0.817391496	0.823754671	0.823754671	12.91907109	40.19072758	40.22949008	27.82443514	27.82443514	7.847750865	4.083031777	5.450691788	51.0	150.0	184.0	229.0	286.0	6.118097198	6.513230111	6.981005741	7.396335294	8.04334217	5.283405172	5.0	0.0	0.0	0.0	0.0
1578	train	11.99429065	0.0	0.0	0.0	0.94882	0.03163	0.37254902	9.0	7.0	8.0	0.238095238	1.741497268	3.787685562	4.946551812	4.985767499	4.985767499	88.81636068	193.1719637	0.872034714	3.930928074	1.88473978	0.827559003	0.834119794	0.834119794	17.60996735	44.24781847	44.28734102	28.7766726	28.7766726	11.22765432	3.731605188	6.567645704	45.0	87.0	94.0	108.0	121.0	5.755742214	6.008813185	6.350885717	6.675823222	7.286876412	5.593201754	3.0	0.0	0.0	0.0	0.0
3937	train	11.99424585	0.0	0.0	0.0	0.90338	0.02442	0.452054795	7.0	6.0	6.0	0.4	1.464705951	3.503936323	5.364281237	5.429416682	5.456813942	106.9235344	255.7873516	0.866628963	4.725118608	2.685888236	0.832582381	0.84269196	0.846944249	13.5106112	40.16769282	39.93218247	30.09273177	29.40399349	13.5734072	3.846287381	2.660841304	57.0	119.0	124.0	136.0	160.0	5.828945618	5.945420609	6.244166901	6.561030666	7.112327445	3.76647681	4.0	5.0	0.0	0.0	5.0
3340	train	11.9883628	0.0	0.0	0.0	0.79802	0.02418	0.357142857	7.0	5.0	7.0	0.615384615	1.435413764	3.42056152	5.622000517	5.736286231	5.736286231	100.4789635	239.4393064	0.917236241	4.693869252	2.708721497	0.889285742	0.90736341	0.90736341	13.01081961	38.69058723	39.11982938	23.06991745	23.06991745	10.94766821	2.687623809	3.174732802	53.0	125.0	146.0	171.0	206.0	5.424950017	5.568344504	5.814130532	6.059123196	6.171700597	1.761308281	940.0	5.0	2.0	1.0	0.0
4492	train	11.9942977	0.0	0.0	0.0	1.20187	0.04451	0.237288136	6.0	6.0	6.0	0.65	1.536226746	2.969066797	4.495972922	4.636051947	4.636051947	90.63737801	175.174941	0.764277704	4.346416303	2.913576252	0.741164988	0.764257135	0.764257135	16.35234122	35.57040907	35.71158422	31.55489847	31.55489847	8.024691358	8.215014639	5.110361201	45.0	91.0	105.0	128.0	145.0	5.541263545	5.902633333	6.336825731	6.647688374	6.940222469	4.181818182	3.0	0.0	0.0	0.0	1.0
5391	train	11.99740197	0.0	0.0	0.0	1.16717	0.04323	0.348837209	10.0	8.0	7.0	0.333333333	2.121308151	4.135940488	4.954993534	4.954993534	4.954993534	91.21625051	177.845441	0.913149977	3.304956603	1.290324266	0.869230056	0.869230056	0.869230056	27.41946631	50.22463587	50.22463587	33.78309762	33.78309762	9.212018141	1.839182024	3.177970213	42.0	69.0	68.0	65.0	56.0	5.365976015	5.484796933	5.488937726	5.451038454	5.624017506	3.15008726	2.0	0.0	0.0	0.0	0.0
4798	train	11.9	0.0	0.0	0.0	1.07328	0.03067	0.4375	10.0	9.0	10.0	0.52173913	1.805732049	3.774899172	5.03125	5.09375	5.21875	115.5668511	241.593547	0.838541667	4.194267951	2.225100828	0.802843685	0.812816899	0.832763326	21.64632684	45.25984815	46.00984815	33.6875	32.6875	0.0	0.0	0.0	244.0	3.891820298	4.442651256	4.828313737	5.323009979	3.603633917	0.473684211	5.0	0.0	2.0	0.0	0.0	0.0	1.0	0.0	0.0
1876	train	11.99795273	0.0	0.0	0.0	0.88522	0.03405	0.395348837	8.0	8.0	6.0	0.3125	1.958904085	4.071873337	4.879525801	4.879525801	4.81545865	84.23287568	175.0905535	0.899242116	3.467360669	1.354391418	0.855991124	0.855991124	0.84475214	24.46842113	49.04665645	49.04665645	29.05145576	30.64779016	8.566329566	1.484729556	2.754510026	41.0	80.0	88.0	97.0	109.0	5.587248658	5.789960171	6.033086222	6.345636361	6.727431725	4.271712159	3.0	0.0	0.0	0.0	0.0
1344	train	11.85	0.0	0.0	0.0	0.34553	0.0192	0.586206897	4.0	3.0	4.0	0.0	1.543787746	2.752510305	4.31971753	4.720049961	4.720049961	44.76984464	79.82279883	0.889200171	3.314193249	2.105470691	0.81729211	0.893035149	0.893035149	14.04170882	38.41598647	38.81945151	22.15177163	22.15177163	5.969821674	0.0	0.0	27.0	52.0	49.0	55.0	57.0	5.313205979	5.356586275	5.693732139	5.934894196	6.163314804	4.855895197	3.0	0.0	0.0	0.0	0.0
2851	train	11.9973755	0.0	0.0	0.0	1.40591	0.04135	0.471698113	11.0	10.0	8.0	0.380952381	2.066246792	4.233106647	5.095660549	5.095660549	5.095660549	109.51108	224.3546523	0.889617897	3.661673663	1.494813808	0.840024007	0.840024007	0.840024007	26.82534912	51.80474679	51.80474679	36.66495004	36.66495004	9.081429723	1.634485958	1.357882243	61.0	144.0	160.0	202.0	248.0	5.958424693	6.222576268	6.64509097	7.05012252	7.59739632	4.155141311	5.0	0.0	0.0	0.0	0.0
3655	train	11.99432274	0.0	0.0	0.0	1.05242	0.03759	0.3125	11.0	10.0	5.0	0.588235294	1.872668903	3.493758408	4.761842188	4.845175521	4.928508855	89.88810733	167.7004036	0.852618471	3.712293598	2.091204093	0.831338743	0.845887362	0.860435981	20.6930345	40.62763936	41.16963207	41.23922344	40.80839636	10.85782272	0.0	0.0	41.0	65.0	64.0	71.0	79.0	5.081404365	5.164785974	5.402677382	5.564520407	5.517452896	2.622764228	584.0	2.0	2.0	0.0	2.0
1037	train	11.85	0.0	0.0	0.0	1.27414	0.0411	0.194029851	7.0	6.0	7.0	0.565217391	1.544983033	3.249425118	4.856258593	4.886109339	4.826407847	103.5138632	217.7114829	0.80055839	4.521106157	2.816664073	0.777259112	0.782036816	0.772481409	16.34289582	37.48100051	37.18296022	32.66162191	33.51125249	10.95052083	6.870985051	12.34098316	48.0	88.0	103.0	103.0	94.0	5.505331536	5.823045895	5.869296913	5.82008293	6.350885717	3.254761905	2.0	0.0	0.0	0.0	0.0
2675	train	11.99850553	0.0	0.0	0.0	0.65739	0.02191	0.538461538	7.0	7.0	7.0	0.227272727	1.54916134	3.798326922	5.39274741	5.469670487	5.469670487	80.55638967	197.5129999	0.946023057	4.151278378	1.902112797	0.892189904	0.904916255	0.904916255	16.11662225	45.21732952	45.71763048	24.97119259	25.68281561	9.868055556	0.0	0.0	48.0	113.0	123.0	149.0	175.0	5.880532986	6.135564891	6.556778356	6.974478911	7.611347717	5.298859935	5.0	0.0	0.0	0.0	0.0
1928	train	11.98827443	0.0	0.0	0.0	1.26105	0.03603	0.418181818	12.0	10.0	9.0	0.333333333	2.016203355	4.420257826	5.440361759	5.440361759	5.440361759	110.8911845	243.1141804	0.941017689	3.765156359	1.361101888	0.896848297	0.896848297	0.896848297	25.40907095	54.61889152	54.61889152	31.0253478	31.0253478	11.8067602	1.01930278	1.151560526	56.0	119.0	140.0	157.0	195.0	5.905361848	6.208590026	6.519147288	6.930494766	7.443663683	4.523099851	4.0	0.0	0.0	0.0	0.0
7780	train	11.85	0.0	0.0	0.0	0.65739	0.02054	0.555555556	8.0	6.0	8.0	0.208333333	1.576065824	3.522345997	4.986187965	5.310443058	5.347480095	85.10755449	190.2066838	0.866426661	4.178821678	2.232541505	0.813502648	0.866405262	0.8724479	14.52040091	43.4228288	44.15673879	27.19164723	27.05257733	11.16	0.0	0.0	50.0	113.0	115.0	135.0	148.0	5.877735782	5.966146739	6.32256524	6.568077911	7.092573716	4.19663419	5.0	0.0	0.0	0.0	0.0
6113	train	11.9	0.0	0.0	0.0	0.75002	0.02344	0.4375	6.0	4.0	6.0	0.384615385	1.434196365	3.333453755	5.195159766	5.456954883	5.488204883	91.78856733	213.3410403	0.865859961	4.565803635	2.666546245	0.831501287	0.8734024	0.878404058	12.8392428	38.33851433	39.28936894	25.46461465	25.33961465	12.109375	2.502417958	1.344363912	48.0	97.0	94.0	102.0	115.0	5.564520407	5.634789603	5.905361848	6.230481448	6.610696045	3.560922064	4.0	0.0	0.0	0.0	0.0
7639	train	11.85	0.0	0.0	0.0	0.51065	0.02837	0.379310345	5.0	2.0	5.0	0.0	1.829422881	3.181112358	4.418157288	4.582118926	4.582118926	53.05326354	92.25225838	0.909463683	3.028558114	1.676868637	0.848103818	0.879577684	0.879577684	21.20868669	42.53006413	42.69530877	24.55617494	24.55617494	6.437869822	0.0	0.0	26.0	49.0	52.0	49.0	44.0	5.176149733	5.384495063	5.616771098	5.771441123	5.993961427	5.180451128	2.0	0.0	0.0	0.0	0.0
5632	train	11.95292193	0.0	0.0	0.0	0.71201	0.02739	0.488372093	7.0	7.0	7.0	0.166666667	1.47628858	3.919427836	4.954993534	5.094528417	5.094528417	63.48040894	168.5353969	0.913149977	3.949976175	1.506836919	0.849492022	0.873414106	0.873414106	12.75135199	42.82846909	42.96909584	23.9908473	23.9908473	8.163265306	3.539005191	5.30483103	42.0	98.0	109.0	134.0	158.0	5.891644212	6.206575927	6.64509097	7.053585727	7.715569535	6.546448087	4.0	0.0	0.0	0.0	0.0
7660	train	11.99614143	0.0	0.0	0.0	0.427	0.01472	0.326923077	7.0	7.0	7.0	0.3	1.567664562	3.653050711	4.902174814	4.940636353	4.979097891	81.51855724	189.958637	0.859964328	4.132775156	2.047389007	0.817029136	0.823439392	0.829849649	14.70282696	39.8749878	40.49017682	29.40152734	28.54757971	12.7575	5.034804071	2.941667449	40.0	90.0	101.0	117.0	134.0	5.834810737	6.124683391	6.533788838	6.90475077	7.483806688	6.41995842	3.0	0.0	0.0	0.0	0.0
7748	train	11.99736454	0.0	0.0	0.0	1.51503	0.03987	0.27027027	12.0	12.0	8.0	0.64	1.801160058	3.98147228	5.441967048	5.441967048	5.441967048	133.2858443	294.6289487	0.876400341	4.408293308	2.227981085	0.858374732	0.858374732	0.858374732	20.68805676	44.71040179	44.71040179	33.34512284	33.34512284	13.77535191	4.952950114	3.667385205	59.0	102.0	111.0	121.0	130.0	5.370638028	5.533389489	5.710427017	5.857933154	6.152732695	2.282771536	3.0	0.0	0.0	0.0	0.0
5174	train	11.85	0.0	0.0	0.0	1.17432	0.03174	0.342465753	9.0	7.0	9.0	0.481481481	1.61299027	3.667896753	5.370996648	5.507982949	5.480585689	117.7482897	267.756463	0.867713874	4.576834289	2.521927806	0.835788262	0.857104891	0.852841565	17.03890232	42.54188578	43.09054919	29.16178109	29.85051938	12.66877334	7.883912653	9.764880478	59.0	130.0	146.0	164.0	177.0	5.777652323	6.01615716	6.255750042	6.519147288	6.935370446	3.106149341	4.0	0.0	0.0	0.0	0.0
7416	train	0.273718823	9.637632201	11.40637535	12.29482958	0.1005065134269738	0.02899405941494739	0.04377526369530871	7.0	6.0	2.083708338704811	0.7423980235454748	1.500149403296779	2.152922271201259	1.622000242774476	4.317766310995578	0.4521292983016775	12.28742986554691	18.33313785190413	0.5218716166897267	1.80091605467528	1.027216514289702	0.6107512457228583	0.07100353316490882	0.2857564483990805	18.40546232856659	13.40464241847544	30.65111383776236	8.41657499011433	1.156754661164545	2.224806546014495	0.3476827021982921	0.1899925571555291	49.0	0.0	0.0	0.0	0.0	3.453566241348289	0.0	4.955108008192233	0.0	0.0	1.114848012429346	4.0	0.0	0.0	0.0	0.0
5595	train	11.99736957	0.0	0.0	0.0	1.384	0.03741	0.473684211	13.0	12.0	8.0	0.304347826	2.000352201	4.110872858	5.45552554	5.49061326	5.49061326	114.0200755	234.3197529	0.935304031	3.832537813	1.722017156	0.884212618	0.889899514	0.889899514	23.88579272	52.58101303	52.61637531	34.37172737	34.37172737	0.0	1.320692044	0.0	151.0	3.970291914	4.543294782	5.017279837	5.438079309	3.989361702	0.473684211	4.0	0.0	1.0	0.0	0.0	0.0	0.0	0.0	0.0
1485	train	11.9	0.0	0.0	0.0	0.44838	0.02242	0.5	7.0	7.0	7.0	0.692307692	1.598608004	3.152936975	4.668980145	4.668980145	4.616348566	60.74710414	119.811605	0.889680761	3.64931951	2.094990539	0.850164792	0.850164792	0.840581218	14.96427126	36.69960307	36.69960307	23.02954756	24.05520888	5.652892562	0.0	0.0	33.0	72.0	81.0	93.0	100.0	5.293304825	5.59471138	5.877735782	6.084499413	6.042632834	3.354019746	4.0	1.0	0.0	0.0	0.0
38	train	11.85	0.0	0.0	0.0	0.64055	0.02209	0.5625	5.0	5.0	5.0	0.227272727	1.692918368	3.585500658	4.886842188	5.043295834	5.043295834	81.26008167	172.1040316	0.875	3.892044133	1.999461843	0.820739178	0.847015377	0.847015377	20.55704437	46.40390854	47.19246572	30.04436146	30.04436146	9.240380263	0.0	0.0	47.0	135.0	161.0	205.0	244.0	6.12905021	6.50578406	6.988413182	7.404279118	7.905810313	6.144343303	5.0	0.0	0.0	0.0	0.0
5831	train	11.9	0.0	0.0	0.0	0.70509	0.03525	0.444444444	6.0	4.0	6.0	0.5	1.633731421	3.368241561	4.440351043	4.593400349	4.593400349	58.81433114	121.2566962	0.858881133	3.536193581	1.80168344	0.818307112	0.84651239	0.84651239	15.76031401	38.306074	38.46032092	23.85171355	23.85171355	5.652892562	2.080083823	0.892020708	33.0	60.0	68.0	63.0	75.0	4.976733742	5.318119994	5.105945474	5.438079309	5.267858159	2.480215827	337.0	3.0	2.0	1.0	4.0
5026	train	11.98839526	0.0	0.0	0.0	0.45169	0.02509	0.571428571	6.0	6.0	5.0	0.083333333	1.669909514	3.597558387	4.637537511	4.56610894	4.637537511	46.75746639	100.7316348	0.9646755	3.137445408	1.209796535	0.890215765	0.876504428	0.890215765	16.29804136	41.56562647	40.70848362	23.35694451	22.1537924	5.551020408	1.15010148	1.582369464	28.0	57.0	60.0	60.0	67.0	5.288267031	5.568344504	5.752572639	6.192362489	6.475432717	5.266666667	3.0	0.0	0.0	0.0	0.0
353	train	11.99737889	0.0	0.0	0.0	0.89886	0.0321	0.448979592	8.0	7.0	4.0	0.5	1.707931981	3.421100287	4.782977446	4.946242752	4.946242752	83.68866708	167.6339141	0.851865471	3.906777863	2.193609557	0.816489069	0.844359645	0.844359645	17.75361116	41.7986678	41.96321067	30.97686425	30.97686425	8.625708885	0.0	0.0	46.0	100.0	115.0	127.0	139.0	5.541263545	5.834810737	6.159095388	6.480044562	7.054449658	3.952471483	4.0	0.0	0.0	0.0	0.0
1605	train	11.85	0.0	0.0	0.0	0.9612	0.03004	0.333333333	8.0	6.0	8.0	0.652173913	1.604762883	3.359380726	5.434323475	5.566973286	5.566973286	105.9143503	221.7191279	0.899068355	4.439631236	2.685013394	0.869780173	0.891011183	0.891011183	17.13767403	40.92973474	41.06342254	26.1978072	26.1978072	10.7266436	2.548879463	3.099985267	51.0	115.0	138.0	165.0	197.0	5.247024072	5.347107531	5.568344504	5.771441123	6.011267174	1.548933039	4.0	0.0	1.0	0.0	0.0
6165	train	11.98824087	0.0	0.0	0.0	0.87968	0.02587	0.533333333	8.0	7.0	8.0	0.36	1.607568564	3.76140633	5.173557262	5.240223929	5.240223929	96.45411387	225.6843798	0.875851208	4.299322031	2.145484266	0.830584019	0.841286958	0.841286958	16.92303479	44.14359463	44.21078296	30.98398785	30.98398785	10.40073869	0.0	0.0	57.0	119.0	136.0	156.0	177.0	5.733341277	5.998936562	6.32256524	6.586171655	6.821107472	3.201378254	6.0	0.0	0.0	0.0	1.0
268	train	11.99736958	0.0	0.0	0.0	226.08	5.0	8.0	1.0	1.0	0.391304348	4.333200795	4.70646125	5.026636532	92.38398423	194.1033903	238.3260438	258.8553688	276.4650092	4.101650909	1.074898463	0.754723182	17.17285819	34.04727538	37.59058421	40.2870418	98.88471975	56.83847433	10.092	5.7421875	6.0	17.73138873	15.91945991	101.0	130.0	153.0	162.0	1025.0	5.886104031	6.184148891	6.349138991	7.865187954	0.5	0.0	1.0	3.0	0.0	4.0	0.0
150	train	11.9882568	0.0	0.0	0.0	0.71201	0.02455	0.407407407	6.0	4.0	6.0	0.347826087	1.502144822	3.518685882	5.319521298	5.430632409	5.430632409	81.11582038	190.0090376	0.924348442	4.25274268	2.23620162	0.880075189	0.898457695	0.898457695	13.761242	41.2510806	41.36306116	23.47379677	23.47379677	0.111111111	0.0	0.0	130.0	3.737669618	4.234106505	4.736198448	5.18178355	4.962845011	0.470588235	4.0	0.0	2.0	0.0	0.0	0.0	1.0	0.0	0.0
6176	train	11.9	0.0	0.0	0.0	0.96603	0.0345	0.25862069	6.0	3.0	6.0	0.6	1.622717551	3.212753788	4.732391124	4.766873883	4.766873883	94.11761795	186.3397197	0.807853615	4.235263444	2.645227207	0.788731854	0.79447898	0.79447898	19.11491512	38.90175582	38.9365084	34.40910024	34.40910024	11.4075	3.129970307	1.702290742	40.0	56.0	53.0	51.0	54.0	4.890349128	4.844187086	4.836281907	4.615120517	4.905274778	1.938697318	771.0	2.0	2.0	0.0	2.0
3423	train	0.0	9.650850822	11.51999045	12.45689751	0.1004550422395496	0.02881626382440029	0.04264769626110629	7.0	6.0	2.086908058110583	0.7321096093599032	1.500346623417853	2.152931272534488	1.611436972362852	4.227311029452847	0.2871080948662622	12.28514445703584	18.33982236582726	0.5242450773157595	1.800661741031471	1.027087037577039	0.6819432934820435	0.07077694612166209	0.2817127840081594	18.46986965829955	13.41097016675664	30.62824775107553	8.418222875251459	1.153587636422176	2.225120999782186	0.3473259475936682	0.1906210895506532	49.0	0.0	0.0	0.0	0.0	3.398680790419696	0.0	4.955101710385202	0.0	0.0	1.114919829172542	4.0	0.0	0.0	0.0	0.0
1421	train	0.0	9.398063978	11.17573097	12.06668988	0.1004290514839527	0.02882024380616173	0.04224092071357197	7.0	6.0	2.086759937283476	0.7320743575182409	1.500211912809778	2.152933657989453	1.606952667647805	4.227559740628885	0.2868275730433443	12.27919293094384	18.33715213361791	0.522937335866084	1.801776103764366	1.026722984208102	0.6642211020090433	0.07023698912648312	0.2814875593786505	18.39031375950949	13.41871156706348	30.65265566899496	8.416012230869377	1.165998105799912	2.224633913123416	0.3472758890410223	0.191181348323832	49.0	0.0	0.0	0.0	0.0	3.404106791669908	0.0	4.955103112493591	0.0	0.0	1.114942110492707	4.0	0.0	0.0	0.0	0.0
6045	train	11.9	0.0	0.0	0.0	0.84088	0.02548	0.46875	8.0	6.0	8.0	0.5	1.625254475	3.456049611	5.125	5.25	5.25	104.0162864	221.1871751	0.854166667	4.374745525	2.543950389	0.817803505	0.837749932	0.837749932	17.20957556	41.26466851	41.39064664	30.3125	30.3125	10.94766821	0.0	0.0	53.0	104.0	115.0	127.0	133.0	5.583496309	5.746203191	5.96870756	6.06610809	6.293419279	2.774688399	5.0	0.0	0.0	0.0	0.0
6963	train	11.99614622	0.0	0.0	0.0	0.55865	0.02149	0.307692308	5.0	4.0	5.0	0.380952381	1.446497679	3.416691882	5.079965439	5.286790199	5.286790199	75.21787929	177.6679778	0.89115326	4.253942039	2.283747837	0.856548714	0.891422078	0.891422078	13.17253077	37.78003874	37.98848191	23.16094561	23.16094561	9.972299169	3.574895276	2.831236917	38.0	94.0	103.0	115.0	123.0	5.549076085	5.707110265	6.021023349	6.29710932	6.646390515	3.726362625	3.0	0.0	0.0	0.0	0.0
4025	train	11.85	0.0	0.0	0.0	0.59335	0.02119	0.5	4.0	2.0	4.0	0.166666667	1.400924277	2.983609994	4.524372821	5.11656563	5.30875844	70.04621386	149.1804997	0.80164566	4.242931913	2.660246195	0.754062137	0.852760938	0.884793073	12.19670626	37.66327925	39.93303598	26.52754914	24.84795372	9.871281774	2.645240576	2.598789911	43.0	105.0	108.0	122.0	136.0	5.736572297	5.749392986	6.054439346	6.338594078	6.778784898	3.659638554	4.0	0.0	0.0	0.0	0.0
730	train	11.85	0.0	0.0	0.0	0.58821	0.02353	0.522727273	7.0	7.0	7.0	0.333333333	1.609910863	3.524766474	4.879664005	4.970573096	4.970573096	70.83607796	155.0897249	0.8938044	3.849520756	1.934665144	0.844033972	0.85975849	0.85975849	15.09231942	40.74942693	40.84104739	24.78881601	24.78881601	8.347140039	2.387421499	2.235814397	39.0	73.0	74.0	78.0	88.0	5.468060141	5.572154032	5.789960171	6.013715156	6.216606101	3.731707317	4.0	0.0	0.0	0.0	1.0
7200	train	11.85	0.0	0.0	0.0	0.94871	0.02711	0.408450704	5.0	4.0	5.0	0.366666667	1.359903381	3.257964576	4.893954733	5.114398176	5.114398176	96.55314006	231.3154849	0.795797719	4.789843738	2.891782543	0.765599455	0.800085139	0.800085139	11.91890933	36.23479183	36.45696025	34.19743584	34.19743584	12.69753086	7.116301229	2.057364073	54.0	108.0	113.0	119.0	122.0	5.693732139	5.717027701	5.942799375	6.159095388	6.29710932	2.93781344	4.0	0.0	0.0	0.0	0.0
4631	train	11.85	0.0	0.0	0.0	0.94219	0.02771	0.433333333	9.0	7.0	9.0	0.32	1.59734893	3.798232164	5.327642471	5.394309137	5.360975804	95.84093581	227.8939298	0.901936879	4.309541665	2.108658432	0.855321488	0.866024427	0.860672957	14.95022234	43.79301566	43.86020399	27.42693829	28.20831641	11.17090909	1.730705342	2.766549713	55.0	145.0	170.0	206.0	258.0	6.135564891	6.507277712	6.91274282	7.365812837	8.028455164	5.623837209	5.0	0.0	0.0	0.0	0.0
2641	train	11.9973867	0.0	0.0	0.0	0.62702	0.02508	0.47826087	7.0	6.0	6.0	0.5	1.66927248	3.605262917	5.028890489	5.028890489	5.028890489	76.78653407	165.8420942	0.910443393	3.854289476	1.918299039	0.869845631	0.869845631	0.869845631	16.59428776	40.34996956	40.34996956	24.54171669	24.54171669	7.935	1.802252083	1.782568613	40.0	88.0	95.0	111.0	119.0	5.446737372	5.641907071	5.926926026	6.154858094	6.517671273	3.367763905	4.0	0.0	0.0	0.0	1.0
72	train	0.0	9.497247144	11.29753925	12.2028324	0.1004448179937172	0.02898351444681434	0.04256915392865534	7.0	6.0	2.084633204716577	0.7419496616520742	1.500348676259101	2.152960284175226	1.61531931362342	4.242466936333217	0.4488361388313326	12.28149342574465	18.33261181938803	0.5210741197225455	1.80568615540838	1.026849276054064	0.6828014587692418	0.06970639627775269	0.282422764827465	18.44351377245955	13.41011629402497	30.65096870795881	8.416626093711221	1.162257712972956	2.235135669503908	0.3473563373906655	0.1898736258378755	49.0	0.0	0.0	0.0	0.0	3.401795632852496	0.0	4.955105834715432	0.0	0.0	1.115000138600567	4.0	0.0	0.0	0.0	0.0
5800	train	11.9	0.0	0.0	0.0	0.99762	0.02934	0.323529412	7.0	4.0	7.0	0.481481481	1.468189508	3.418409236	5.373796297	5.414309348	5.384897584	99.83688654	232.451828	0.882764534	4.619273333	2.669053606	0.8500249	0.856433238	0.851780897	13.39735243	39.37004295	39.41087302	27.68770448	28.40902146	11.58847737	6.022937837	12.85183038	54.0	140.0	160.0	184.0	206.0	5.743003188	5.866468057	6.095824562	6.361302478	6.688354714	2.471428571	4.0	0.0	0.0	0.0	0.0
277	train	11.99735645	0.0	0.0	0.0	1.21403	0.03113	0.46875	9.0	8.0	6.0	0.275862069	1.761835686	3.789194163	5.296569531	5.519454883	5.519454883	112.7574839	242.5084264	0.882761589	4.238164314	2.210805837	0.837809202	0.873065116	0.873065116	20.16198974	48.96959171	49.19422115	33.80653184	33.80653184	0.0	2.586730261	0.0	49.0	4.025351691	4.564348191	5.087596335	5.59471138	4.192840647	0.466666667	5.0	0.0	1.0	0.0	0.0	0.0	1.0	0.0	0.0
913	train	11.99850553	0.0	0.0	0.0	0.96646	0.03222	0.387755102	5.0	5.0	5.0	0.285714286	1.761278857	3.936366355	5.134918517	5.175734844	5.175734844	86.302664	192.8819514	0.914547441	3.853430987	1.678343489	0.865814523	0.87269669	0.87269669	23.33291308	52.12579198	52.16692769	30.2193544	30.2193544	10.74480151	1.877445008	4.006468955	46.0	99.0	108.0	114.0	121.0	5.720311777	5.953243334	6.137727054	6.327936784	6.84694314	4.001037344	3.0	0.0	0.0	0.0	0.0
5625	train	11.9882408	0.0	0.0	0.0	0.97667	0.02713	0.459016393	11.0	10.0	10.0	0.28	1.69806833	4.170246701	5.446970534	5.479757419	5.479757419	103.5821681	254.3850487	0.91843058	4.232669008	1.760490637	0.869180799	0.874412649	0.874412649	16.67558622	46.25781467	46.29085811	28.34288235	28.34288235	12.02734839	2.327875683	4.221375017	58.0	142.0	159.0	178.0	197.0	6.075346031	6.293419279	6.605297921	6.920671504	7.387090236	4.282336579	5.0	0.0	0.0	0.0	0.0
1547	train	11.999	0.0	0.0	0.0	0.48537	0.02206	0.571428571	5.0	5.0	5.0	0.0	1.697691122	3.057754632	4.614997303	4.957854446	4.957854446	59.41918926	107.0214121	0.89973536	3.431591895	2.071528385	0.835511096	0.897582843	0.897582843	19.20653041	43.96073575	44.93440004	25.1717822	25.1717822	8.203125	0.0	0.0	32.0	59.0	53.0	57.0	64.0	5.493061443	5.468060141	5.746203191	6.167516491	6.771935556	5.866541353	3.0	0.0	0.0	0.0	0.0
5764	train	11.98827451	0.0	0.0	0.0	0.72987	0.02433	0.54	9.0	7.0	9.0	0.333333333	1.665018384	3.941350863	5.28385619	5.28385619	5.28385619	83.25091921	197.0675431	0.936213825	3.978837806	1.702505327	0.880642698	0.880642698	0.880642698	15.87603352	44.81787918	44.81787918	26.10201821	26.10201821	9.469387755	0.0	0.0	49.0	112.0	117.0	134.0	141.0	5.749392986	5.82008293	6.133398043	6.338594078	6.672032945	3.409134158	5.0	1.0	0.0	0.0	0.0
2617	train	11.99612918	0.0	0.0	0.0	226.06	5.0	5.0	0.0	0.0	0.36	4.684828906	5.221294744	5.289091354	89.61870985	203.5343051	276.4049054	308.0563899	312.0563899	4.363681865	0.661348305	0.593551695	15.81401911	35.00559404	40.65681558	41.94271148	102.182134	50.17163517	10.95052083	5.566863905	13.0	11.67709932	25.56656266	103.0	138.0	150.0	152.0	1043.0	6.432940093	6.663132696	6.745236349	8.27512163	0.466666667	0.0	2.0	2.0	0.0	4.0	0.0
2498	train	11.99793216	0.0	0.0	0.0	0.76355	0.02545	0.419354839	5.0	4.0	5.0	0.583333333	1.469694697	3.283208512	5.28468381	5.316941875	5.316941875	91.12107123	203.5589277	0.887556193	4.484501613	2.670987799	0.856523184	0.861751459	0.861751459	15.03550022	39.35715356	39.38966405	26.0293738	26.0293738	9.469387755	4.189880998	3.002666757	49.0	114.0	125.0	141.0	155.0	5.484796933	5.659482216	5.913503006	6.150602768	6.23636959	2.343478261	5.0	0.0	0.0	0.0	0.0
6503	train	11.9	0.0	0.0	0.0	286.08	6.0	6.0	0.0	0.0	0.318181818	4.80881418	5.070538035	5.16197818	88.59823365	197.423296	250.0583374	263.6679778	268.4228653	3.996627533	0.629901683	0.538461538	20.47039317	41.30889993	44.96633269	46.23523061	96.7210193	44.94631473	10.29244002	5.333333333	10.0	18.32518402	21.75421779	104.0	156.0	173.0	189.0	1127.0	6.575075841	6.799055862	7.036148494	8.378160983	0.470588235	0.0	2.0	3.0	0.0	6.0	0.0
432	train	11.85	0.0	0.0	0.0	0.84071	0.02899	0.403846154	7.0	7.0	7.0	0.35	1.775629577	3.52153647	4.940636353	5.085055103	5.085055103	92.33273798	183.1198964	0.866711446	3.924810142	2.178903248	0.826569345	0.850730628	0.850730628	21.95291775	44.83352891	45.56142785	30.88342445	30.88342445	11.0394808	0.0	0.0	43.0	79.0	80.0	82.0	94.0	5.365976015	5.361292166	5.455321115	5.746203191	5.872117789	2.676037483	3.0	0.0	0.0	0.0	0.0
5346	train	11.99613702	0.0	0.0	0.0	0.65717	0.02191	0.436363636	7.0	6.0	7.0	0.347826087	1.546937582	3.520239369	5.085638577	5.194729486	5.267456759	85.08156701	193.6131653	0.87966133	4.234422132	2.261120344	0.838371876	0.856355606	0.868344759	14.43690508	40.75587521	41.81052029	26.05034998	25.08782205	10.74480151	4.391974409	4.365199178	46.0	96.0	103.0	116.0	126.0	5.673323267	5.81711116	6.086774727	6.267200549	6.639875834	3.589690722	4.0	0.0	0.0	0.0	0.0
3856	train	11.85	0.0	0.0	0.0	0.77098	0.0257	0.385964912	7.0	4.0	7.0	0.347826087	1.531507996	3.305604166	5.113248786	5.407194181	5.407194181	87.29595576	188.4194375	0.876623556	4.301382018	2.527285848	0.83996386	0.888250873	0.888250873	14.28749986	40.76306362	41.05930915	24.74431327	24.74431327	11.74380165	5.116344151	4.86200483	44.0	80.0	80.0	91.0	92.0	5.379897354	5.393627546	5.620400866	5.616771098	5.762051383	2.624338624	3.0	0.0	0.0	0.0	0.0
4819	train	0.0	9.842622277	11.72896383	12.67801502	0.1005692945453064	0.02948874028668845	0.04254516493747621	7.0	6.0	2.082714432725283	0.7283866920317584	1.500238618495762	2.152616562730358	1.616223910248076	4.270130020644688	0.2844648906585405	12.28620658226342	18.33336476846755	0.5233695907377862	1.805601380100216	1.027082177868374	0.6068791132546371	0.07073999760154769	0.2825101979652236	18.4195415921042	13.40893830675791	30.64379898541635	8.417077455904629	1.139722746735805	2.233429762733684	0.3475683498809273	0.1893476048419951	49.0	0.0	0.0	0.0	0.0	3.4142429339147	0.0	4.955103027461423	0.0	0.0	1.114495360148138	4.0	0.0	0.0	0.0	0.0
7214	train	11.85	0.0	0.0	0.0	358.07	5.0	7.0	0.0	0.0	0.483870968	4.716437832	5.379482647	5.48074847	111.1493208	257.3574456	372.5985887	424.9791291	432.9791291	4.89682732	0.924298101	0.823032279	12.52661129	31.3186261	37.2942548	38.7973367	129.6058175	59.52616693	14.25445898	7.853185596	14.0	11.27973610832645	29.45040664	121.0	213.0	245.0	280.0	1480.0	7.036148494	7.289610521	7.593374193	8.812694613	0.5	0.0	2.0	3.0	0.0	6.0	0.0
1015	train	11.99740199	0.0	0.0	0.0	0.71	0.03381	0.375	6.0	6.0	3.0	0.133333333	1.682284946	3.226409766	4.429229297	4.663909766	4.663909766	53.83311826	103.2451125	0.885845859	3.317715054	1.773590234	0.832260267	0.876357155	0.876357155	17.88590712	41.37852592	42.56136169	29.67556367	29.67556367	7.513007284	0.0	0.0	31.0	58.0	63.0	66.0	61.0	5.393627546	5.579729826	5.902633333	6.084499413	6.278521424	5.37979798	312.0	2.0	2.0	0.0	2.0
4195	train	11.99736696	0.0	0.0	0.0	0.9157	0.02954	0.454545455	7.0	6.0	4.0	0.333333333	1.607032895	3.432781823	5.085638577	5.317545623	5.317545623	88.3868092	188.8030003	0.87966133	4.174326819	2.34857789	0.838371876	0.876601952	0.876601952	16.02608892	42.24783549	42.48155722	29.04681611	29.04681611	10.50812162	2.698228923	1.364919282	49.0	106.0	117.0	131.0	143.0	5.720311777	5.929589143	6.246106765	6.542471961	7.159291905	4.236598891	857.0	4.0	3.0	0.0	5.0
6249	train	11.99737889	0.0	0.0	0.0	149.09	4.0	9.0	0.0	0.0	0.25	4.777369171	5.107364383	5.107364383	85.3038016	181.0957813	224.536351	240.046126	240.046126	3.73961435	0.447224468	0.447224468	19.24360992	40.24939104	45.27600815	45.60858558	90.73311054	44.90009664	10.08	5.437517955	21.0	6.147719339	17.38539978	89.0	108.0	112.0	121.0	877.0	6.391917113	6.597145702	6.84694314	8.266421473	0.5	0.0	1.0	2.0	0.0	3.0	0.0
1555	train	0.501032756	9.536257095	11.37477772	12.29845582	0.09532354335189501	0.02922550032254304	0.04262803525773275	7.0	6.0	2.082947463471707	0.7412207438149647	1.500266782790754	2.152533650078234	1.605387749800855	4.281921842346771	0.4421388562371788	12.28100425081125	18.33166886710531	0.5232242082276686	1.800522664795107	1.026887077818349	0.6828089416684423	0.07070580480032963	0.2771955846685823	18.46473482946552	13.40051472718434	30.64130692273983	8.414689340026289	1.160346333309741	2.226314185371353	0.347305523299595	0.1911111214856222	49.0	0.0	0.0	0.0	0.0	3.392574597473284	0.0	4.955107199205694	0.0	0.0	1.114759952012785	4.0	0.0	0.0	0.0	0.0
1929	train	0.212680886	9.469700127	11.25631561	12.15106192	0.1006264301066503	0.02977746949150376	0.04312871585611597	7.0	6.0	2.083366266421264	0.7415323989276216	1.500309955768124	2.152640932692777	1.611399634083344	4.486253659311466	0.2882639427311747	12.28064541313998	18.3387959572608	0.5227190908882802	1.800713355929196	1.02687181299036	0.5668709735159528	0.0702667493181126	0.2767879760264444	18.76292707077655	13.42853680291055	30.64866954652996	8.417164473180518	1.170599432340359	2.225550752563184	0.3473448052905536	0.1911316354611241	49.0	0.0	0.0	0.0	0.0	3.40283525795899	0.0	4.95510338395637	0.0	0.0	1.114393598106501	4.0	0.0	0.0	0.0	0.0
2046	train	11.9	0.0	0.0	0.0	0.67754	0.02509	0.52173913	8.0	7.0	7.0	0.263157895	1.677235423	3.874682142	4.958344565	5.001822826	5.001822826	77.15282946	178.2353785	0.897671576	3.846326533	1.648879814	0.846425512	0.853847568	0.853847568	16.42294948	42.44212416	42.48594264	26.6901982	26.6901982	9.212018141	0.0	0.0	42.0	86.0	94.0	105.0	120.0	5.793013608	6.11146734	6.520621128	6.918695219	7.533158807	6.942541436	4.0	0.0	0.0	0.0	0.0
6433	train	11.98822688	0.0	0.0	0.0	0.90657	0.02747	0.517857143	6.0	4.0	6.0	0.148148148	1.487110948	3.315251131	5.052628806	5.423251797	5.423251797	83.27821308	185.6540633	0.870039609	4.320243974	2.492103791	0.816279809	0.876155979	0.876155979	13.40620667	43.79035994	44.16388307	27.06865817	27.06865817	10.54595336	4.113917104	3.220539846	54.0	129.0	131.0	151.0	171.0	6.02827852	6.194405391	6.570882962	6.903747258	7.25629724	4.739026337	5.0	0.0	0.0	0.0	0.0
4190	train	11.9883061	0.0	0.0	0.0	0.5377	0.02068	0.533333333	8.0	7.0	8.0	0.333333333	1.666657524	3.686850167	4.897300041	4.897300041	4.897300041	74.99958858	165.9082575	0.891739082	3.825195572	1.805002929	0.843292705	0.843292705	0.843292705	15.97268027	41.52240728	41.52240728	26.63919526	26.63919526	9.0	1.624550271	1.68811811	40.0	90.0	92.0	107.0	122.0	5.609471795	5.765191103	6.115892125	6.450470422	6.867974409	4.20935412	4.0	0.0	0.0	0.0	0.0
744	train	11.99736696	0.0	0.0	0.0	1.14154	0.03357	0.464285714	9.0	8.0	6.0	0.291666667	1.798227715	3.824472542	5.195485949	5.26691452	5.231200234	100.700752	214.1704623	0.894638957	4.009127207	1.98288238	0.847649869	0.859303528	0.853476699	20.44975493	47.77457645	47.45398627	32.9294873	33.06546426	10.40073869	2.94110511	2.038224583	57.0	123.0	150.0	177.0	203.0	5.976350909	6.320768294	6.7310181	7.069874128	7.871311203	5.288859239	5.0	0.0	0.0	0.0	0.0
5656	train	11.9	0.0	0.0	0.0	0.49271	0.0154	0.352112676	5.0	5.0	5.0	0.777777778	1.325625301	2.776725205	4.949475557	5.107493598	5.107493598	94.11939639	197.1474895	0.804825867	4.824121818	3.373021915	0.785159852	0.810227037	0.810227037	11.79609172	34.53588904	34.69514357	31.50118564	31.50118564	9.223140496	0.0	0.0	55.0	161.0	194.0	245.0	292.0	5.433722004	5.598421959	5.84932478	6.040254711	6.49375384	1.463414634	3.0	0.0	0.0	0.0	0.0
7133	train	0.0	9.287023597	11.0380942	11.91750351	0.1004497077028576	0.028871547640018	0.04280363497070928	7.0	6.0	2.086588917767732	0.7420362461562319	1.500179948449438	2.152937238416582	1.610859538382227	4.232932370386104	0.2862068076230987	12.28108824612112	18.33169879789109	0.5240134567830714	1.801890607817019	1.026810303154399	0.5648786961121055	0.07016009733091198	0.2805027438499975	18.74122475288286	13.40908005295457	30.65697252435038	8.416348614342425	1.177488116968405	2.226932210803488	0.3472300027602739	0.1910400561890114	49.0	0.0	0.0	0.0	0.0	3.415778695234128	0.0	4.955101661681178	0.0	0.0	1.114944346775056	4.0	0.0	0.0	0.0	0.0
244	train	11.999	0.0	0.0	0.0	349.07	7.0	7.0	0.0	0.0	0.566666667	4.796441123	5.246690039	5.374895167	110.6401355	249.4150171	374.1224076	409.2418231	419.2418231	4.866938943	1.03871218	0.910507051	12.90056549	31.48665067	36.45851887	38.03969355	126.2607457	55.78694961	13.5734072	6.668162154	18.0	20.79562634	34.4032602	149.0	253.0	278.0	311.0	1706.0	7.161622003	7.444833274	7.801800402	8.965973184	0.470588235	1.0	1.0	3.0	0.0	6.0	0.0
1454	train	0.471904193	9.880577101	11.74491775	12.68183156	0.1006769654436065	0.02977587949741213	0.04266579951971398	7.0	6.0	2.087032785560897	0.7412029955669724	1.500366656710105	2.152627672995302	1.622160989689269	4.486269539665068	0.4530814450622536	12.28921839207032	18.33952776720754	0.5220839482674969	1.80004907741947	1.027323875837193	0.6834679539707575	0.07061522735446657	0.2769835420637235	18.4606082414643	13.43180409755831	30.63344577811262	8.417442911470005	1.145764855260621	2.225033506328197	0.3477985093506834	0.1911757133893408	49.0	0.0	0.0	0.0	0.0	3.429925992638871	0.0	4.955104729812883	0.0	0.0	1.114340536075496	4.0	0.0	0.0	0.0	0.0
2042	train	11.85	0.0	0.0	0.0	0.64386	0.0222	0.531914894	4.0	4.0	4.0	0.041666667	1.515171032	3.045943578	5.21416332	5.426929277	5.426929277	71.21303848	143.1593482	0.93871274	4.03941782	2.508645273	0.875712363	0.911446146	0.911446146	16.31642108	46.82832865	47.04275951	26.02844852	26.02844852	10.54338843	0.0	0.0	44.0	96.0	102.0	116.0	129.0	5.866468057	6.03068526	6.391917113	6.701960366	7.334981879	5.537667699	4.0	0.0	0.0	0.0	0.0
3940	train	11.85	0.0	0.0	0.0	0.94219	0.02855	0.457627119	5.0	5.0	5.0	0.259259259	1.520807749	3.563508788	5.267987753	5.403580973	5.403580973	89.72765718	210.2470185	0.895513753	4.361835301	2.319134261	0.848381885	0.870218464	0.870218464	15.91215281	44.78997278	44.92662702	27.08371237	27.08371237	10.54595336	4.904456541	4.139826132	54.0	123.0	142.0	166.0	195.0	6.054439346	6.383506635	6.820016365	7.201170883	7.973499964	6.143356643	5.0	0.0	0.0	0.0	0.0
5986	train	11.89	0.0	0.0	0.0	1.0661	0.03231	0.34375	6.0	5.0	6.0	0.423076923	1.445752763	3.684916375	5.124389062	5.155639062	5.155639062	92.52817682	235.834648	0.854064844	4.554247237	2.315083625	0.817706017	0.822692624	0.822692624	13.02213726	39.35478731	39.72978731	29.17786621	29.17786621	10.54595336	7.214733177	5.701490444	54.0	110.0	135.0	159.0	177.0	5.872117789	6.202535517	6.579251212	6.873163834	7.412764017	4.673212883	4.0	1.0	0.0	0.0	0.0
5314	train	11.85	0.0	0.0	0.0	0.78038	0.02691	0.52	7.0	6.0	7.0	0.227272727	1.564740151	3.775854381	5.17366069	5.30875844	5.30875844	78.23700753	188.7927191	0.916688965	4.079116039	1.868001808	0.862276782	0.884793073	0.884793073	14.40636504	42.7890206	42.92517549	25.15370797	25.15370797	8.859375	1.687845216	1.071799931	48.0	100.0	111.0	130.0	154.0	5.840641657	6.115892125	6.504288174	6.867974409	7.375882148	5.134408602	5.0	0.0	0.0	0.0	1.0
6678	train	11.85	0.0	0.0	0.0	1.07871	0.02697	0.555555556	11.0	8.0	10.0	0.137931034	1.716436291	3.91569018	5.560380519	5.679583296	5.679583296	108.1354863	246.6884813	0.930252655	4.260843633	2.061589744	0.872211157	0.890909516	0.890909516	17.08339986	49.94273958	50.06287512	29.1805402	29.1805402	0.0	0.0	0.0	212.0	4.110873864	4.65396035	5.159055299	5.66296048	5.013774105	0.5	6.0	1.0	1.0	0.0	0.0	0.0	1.0	0.0	0.0
856	train	11.85	0.0	0.0	0.0	0.968	0.02933	0.412698413	8.0	6.0	8.0	0.416666667	1.640044719	3.56436577	5.425615043	5.50728563	5.552599169	103.3228173	224.5550435	0.907706367	4.337235205	2.412914153	0.868386362	0.88145799	0.888710562	17.48726956	43.23054495	43.31285461	27.34703387	26.96625197	11.37278107	1.895658035	1.250285744	52.0	114.0	118.0	123.0	131.0	5.697093487	5.823045895	5.918893854	5.966146739	6.156978986	2.684160305	4.0	0.0	0.0	0.0	0.0
2387	train	11.85	0.0	0.0	0.0	0.74238	0.0225	0.568627451	9.0	9.0	7.0	0.041666667	1.699728772	3.701768607	5.461545195	5.579192254	5.579192254	86.68616739	188.790199	0.962823636	3.97269657	1.970656735	0.897179225	0.916505349	0.916505349	17.02190111	49.18773396	49.30630161	25.96917095	25.96917095	11.37278107	1.555556805	1.293635412	52.0	117.0	123.0	141.0	158.0	6.118097198	6.309918278	6.679599186	7.037905963	7.618251098	5.987212276	5.0	0.0	0.0	0.0	0.0
3332	train	11.85	0.0	0.0	0.0	0.33201	0.03018	0.6	3.0	2.0	3.0	0.0	1.930124965	3.272905595	3.906890596	3.906890596	3.906890596	28.95187448	49.09358393	1.0	1.97676563	0.633985	0.903969365	0.903969365	0.903969365	25.6244759	44.01582543	44.01582543	22.39950608	22.39950608	2.802768166	0.0	0.0	17.0	31.0	26.0	23.0	19.0	4.727387819	4.727387819	4.795790546	4.919980926	0.0	3.619791667	2.0	0.0	0.0	0.0	0.0
5615	train	11.85	0.0	0.0	0.0	0.97565	0.02439	0.391891892	8.0	4.0	8.0	0.258064516	1.575421606	3.451132922	5.313984953	5.584255224	5.665336305	116.5811989	255.3838362	0.855789494	4.634031759	2.758320444	0.818562108	0.86019433	0.872683996	16.44095674	43.94419091	44.9957003	30.81737804	29.37196874	16.17810974	4.244061007	2.573330533	59.0	116.0	123.0	141.0	164.0	5.834810737	5.916202063	6.192362489	6.516193076	7.010311867	3.60997547	4.0	0.0	0.0	0.0	0.0
4577	train	11.99327694	0.0	0.0	0.0	268.06	6.0	6.0	0.0	0.0	0.090909091	4.42292738	4.977487707	5.229871195	65.40792934	155.680222	203.4546595	228.9644345	240.574075	4.101650449	0.54607425	0.293690761	12.00832801	32.07609137	39.60605727	42.46127987	92.81173774	52.12484985	8.625708885	4.125976563	26.0	13.68235276	25.96937343	105.0	173.0	200.0	215.0	1215.0	7.334981879	7.765993079	8.059908335	9.173987543	0.5	0.0	2.0	3.0	0.0	6.0	0.0
3927	train	11.99842729	0.0	0.0	0.0	1.13823	0.03076	0.461538462	10.0	10.0	10.0	0.384615385	1.709642498	3.986141523	5.476063582	5.476063582	5.476063582	111.1267624	259.099199	0.909287468	4.312725315	2.03622629	0.861347824	0.861347824	0.861347824	18.23739805	46.50831728	46.50831728	30.0213674	30.0213674	11.11111111	2.973063832	2.746472285	63.0	152.0	185.0	235.0	275.0	6.148468296	6.459904454	6.882437471	7.193685818	7.878912912	4.464342314	6.0	0.0	0.0	0.0	0.0
2299	train	11.85	0.0	0.0	0.0	0.58635	0.01777	0.449275362	5.0	4.0	6.0	0.592592593	1.412741303	3.311244605	5.180988225	5.296930254	5.296930254	97.4791499	228.4758777	0.848157073	4.695783154	2.797279852	0.819526598	0.837866261	0.837866261	12.74964693	37.33474453	37.45159381	28.43544238	28.43544238	10.94766821	0.0	0.0	53.0	119.0	132.0	141.0	156.0	5.313205979	5.393627546	5.488937726	5.634789603	5.899897354	1.6625	3.0	0.0	1.0	0.0	0.0
1303	train	11.99424585	0.0	0.0	0.0	0.90338	0.02442	0.452054795	7.0	6.0	6.0	0.4	1.464705951	3.503936323	5.282089456	5.402019422	5.402019422	106.9235344	255.7873516	0.853350431	4.725118608	2.685888236	0.819825513	0.838439671	0.838439671	13.5106112	39.78370241	39.90457083	30.20752148	30.20752148	13.5734072	3.857263498	2.647227916	57.0	120.0	123.0	137.0	160.0	5.840641657	5.940171253	6.251903883	6.561030666	7.112327445	3.772616137	5.0	0.0	0.0	0.0	0.0
4373	train	0.357177658	9.409437102	11.29996737	12.25384801	0.1003465031787964	0.03091118172233825	0.04373844847043387	7.0	6.0	2.085863849616295	0.7283845414296902	1.500298936504141	2.152933386844222	1.60099877800821	4.214206781243942	0.2880629959071008	12.27183487564199	18.3326253616159	0.5259358324971194	1.798608116137666	1.026817415025733	0.5135101640520644	0.07202069642016566	0.286169706593172	18.55981225278969	13.40550484158003	30.65009295679305	8.416787351406853	1.166594749228563	2.226863707043246	0.3469724631132066	0.1896644999290371	49.0	0.0	0.0	0.0	0.0	3.378480852005127	0.0	4.955100973822899	0.0	0.0	1.115040944960368	4.0	0.0	0.0	0.0	0.0
5137	train	11.89	0.0	0.0	0.0	0.77098	0.03084	0.346938776	5.0	4.0	5.0	0.473684211	1.584003512	3.549537407	4.859208824	4.981657803	4.981657803	77.61617209	173.927333	0.865442553	4.030706332	2.065172437	0.833070538	0.854063387	0.854063387	17.34253035	40.1732839	40.29669105	25.34083943	25.34083943	8.347140039	4.562036614	7.873722887	39.0	77.0	77.0	79.0	84.0	5.424950017	5.556828062	5.713732806	5.988961417	6.408528791	3.811510791	3.0	1.0	0.0	0.0	0.0
13	train	11.99736957	0.0	0.0	0.0	0.81919	0.0256	0.509090909	9.0	9.0	7.0	0.260869565	1.604353633	3.897675662	5.367634486	5.388457159	5.476725395	88.23944981	214.3721614	0.928438076	4.177006081	1.883684051	0.878712122	0.882120911	0.896570921	15.44546848	43.87554761	44.95045152	26.38829456	25.85024408	10.31804734	1.870766176	1.95052699	52.0	122.0	134.0	162.0	191.0	5.942799375	6.212606096	6.629363253	7.042286172	7.683403681	5.219402985	5.0	0.0	0.0	0.0	0.0
6073	train	11.85	0.0	0.0	0.0	1.01035	0.02807	0.361111111	9.0	7.0	8.0	0.592592593	1.574594577	3.50402759	5.499582467	5.471804689	5.499582467	113.3708095	252.2899865	0.891353212	4.595330425	2.665897411	0.862674267	0.858316995	0.862674267	15.29721878	41.02203148	40.68869814	28.38525574	27.69026824	12.02734839	4.964989678	5.08433674	58.0	138.0	164.0	204.0	241.0	5.564520407	5.733341277	6.003887067	6.216606101	6.490723535	1.9400978	5.0	0.0	0.0	0.0	0.0
7345	train	11.85	0.0	0.0	0.0	0.57138	0.02286	0.431372549	3.0	2.0	3.0	0.409090909	1.31323067	3.130033009	4.794878528	5.005758675	5.005758675	66.97476416	159.6316835	0.845296013	4.359194672	2.542392333	0.808479326	0.844036482	0.844036482	11.12326108	34.56289521	34.7754255	25.61128313	25.61128313	8.347140039	0.0	0.0	39.0	86.0	92.0	105.0	116.0	5.327876169	5.298317367	5.549076085	5.673323267	6.180016654	2.407366071	589.0	4.0	3.0	0.0	5.0
4696	train	11.98830622	0.0	0.0	0.0	0.35906	0.01561	0.534883721	5.0	5.0	5.0	0.333333333	1.484469129	3.482927015	4.711034813	4.821613592	4.821613592	63.83217253	149.7658616	0.868191109	3.941795626	1.94333774	0.822468617	0.841773839	0.841773839	13.31010573	36.6332393	36.74468336	25.42298521	25.42298521	0.0	0.0	0.0	115.0	3.526360525	3.988984047	4.521788577	5.023880521	4.413098237	0.461538462	4.0	0.0	1.0	0.0	0.0	0.0	1.0	0.0	0.0
4261	train	11.9	0.0	0.0	0.0	0.34965	0.01748	0.302325581	5.0	3.0	5.0	0.857142857	1.486725884	2.501637311	4.22836301	4.449520569	4.589055452	63.92921303	107.5704044	0.779240085	3.93953887	2.924627443	0.757097834	0.796696588	0.82168062	13.89250117	31.72550103	32.45965311	25.19653515	23.78897015	8.444444444	0.0	0.0	27.0	51.0	45.0	46.0	42.0	4.248495242	4.077537444	4.127134385	4.060443011	3.850147602	1.2960199	2.0	0.0	0.0	0.0	0.0
1840	train	11.99736957	0.0	0.0	0.0	0.85287	0.02665	0.509090909	9.0	9.0	7.0	0.260869565	1.604353633	3.934039298	5.403998123	5.476725395	5.476725395	88.23944981	216.3721614	0.934727882	4.177006081	1.847320415	0.884665055	0.896570921	0.896570921	15.44546848	44.31191125	45.03941046	25.85024408	25.85024408	10.31804734	1.820096345	1.668304427	52.0	121.0	136.0	161.0	191.0	5.937536205	6.212606096	6.625392368	7.03966035	7.682021511	5.221391174	5.0	0.0	0.0	0.0	0.0
7740	train	11.95291403	0.0	0.0	0.0	0.61938	0.02136	0.565217391	9.0	9.0	9.0	0.263157895	1.663194246	4.040109109	5.289760054	5.289760054	5.289760054	76.50693533	185.845019	0.957671896	3.86036771	1.483452847	0.891922834	0.891922834	0.891922834	15.73807741	46.2516714	46.2516714	25.12559991	25.12559991	9.240380263	1.079862569	1.57404208	47.0	117.0	132.0	160.0	189.0	5.886104031	6.146329258	6.530877628	6.874198495	7.512617545	4.666666667	5.0	0.0	0.0	0.0	0.0
3522	train	11.9	0.0	0.0	0.0	0.39353	0.01711	0.552631579	6.0	6.0	6.0	0.25	1.571615205	3.714646921	4.721611724	4.721611724	4.721611724	59.7213778	141.156583	0.899709783	3.676312308	1.533280592	0.836593202	0.836593202	0.836593202	14.36349569	40.45164847	40.45164847	25.77812955	25.77812955	7.486111111	0.0	0.0	36.0	92.0	100.0	118.0	133.0	5.777652323	6.054439346	6.463029457	6.792344427	7.319202459	5.715359828	4.0	0.0	0.0	0.0	0.0
3717	train	11.85	0.0	0.0	0.0	0.22585	0.01882	0.578947368	3.0	3.0	3.0	0.0	1.700223726	2.815333779	3.681880803	3.93213804	3.93213804	32.3042508	53.49134181	0.866747559	2.547703787	1.432593734	0.792849876	0.846739838	0.846739838	19.87621503	37.85331528	38.10553079	22.46190376	22.46190376	3.806228374	0.0	0.0	17.0	27.0	22.0	20.0	16.0	4.718498871	4.727387819	4.96284463	5.030437921	4.795790546	5.15625	139.0	2.0	1.0	0.0	2.0
3107	train	11.89	0.0	0.0	0.0	1.28867	0.03068	0.34939759	9.0	8.0	8.0	0.53125	1.608055911	3.884179852	5.651676781	5.651676781	5.651676781	133.4686406	322.3869277	0.886532051	4.76698352	2.490859579	0.858270154	0.858270154	0.858270154	17.10803468	44.17553554	44.17553554	30.68556495	30.68556495	14.61349967	6.700094801	5.263737015	67.0	138.0	160.0	191.0	210.0	5.840641657	6.077642243	6.393590754	6.606650186	6.874198495	2.977763244	5.0	0.0	0.0	0.0	1.0
2131	train	11.98829483	0.0	0.0	0.0	0.77172	0.02756	0.37254902	9.0	6.0	9.0	0.421052632	1.665323612	3.785332091	5.235863332	5.235863332	5.235863332	84.93150422	193.0519366	0.923037857	4.00710173	1.887093251	0.882835141	0.882835141	0.882835141	16.09731282	42.40073668	42.40073668	24.42870277	24.42870277	0.327592674	2.117109003	0.0	231.0	3.663561646	4.189654742	4.727387819	5.214935758	3.540322581	0.5	4.0	0.0	2.0	0.0	0.0	0.0	1.0	0.0	0.0
6232	train	11.99612916	0.0	0.0	0.0	1.42763	0.04199	0.369230769	8.0	7.0	8.0	0.48	1.621736762	3.78050308	5.214224351	5.214224351	5.214224351	105.4128895	245.7327002	0.86580968	4.400631051	2.241864733	0.832041161	0.832041161	0.832041161	17.09982925	43.09451105	43.09451105	29.06778135	29.06778135	9.386666667	6.328433397	9.931375965	60.0	143.0	171.0	210.0	250.0	5.932245187	6.282266747	6.682108597	7.025538315	7.669028289	4.098141696	5.0	0.0	0.0	0.0	0.0
6649	train	11.85	0.0	0.0	0.0	333.3402998308725	8.0	9.0	1.0	1.0	0.166666667	4.871257134	5.58847725	5.648178743	119.5000502	251.0418131	326.374228	374.4279758	378.4279758	4.282506351	0.47761194	0.417910448	21.32767195	40.2232699	49.9582184	51.33730004	126.5221788	70.1610115	13.96694215	7.631126965	27.0	0.0	34.95963345	152.0	228.0	275.0	315.0	1680.0	7.290974778	7.739359203	8.056743775	9.196241448	0.5	0.0	0.0	6.0	0.0	7.0	0.0
6048	train	0.0	9.940831506	11.81963781	12.76256642	0.1005994441247004	0.02937413996471331	0.04295802423504679	7.0	6.0	2.081983580623334	0.7410982211779381	1.500352369241016	2.152601020176637	1.626899656715045	4.255632659435763	0.4495679533833914	12.28689370451287	18.33852326059668	0.5222392978903687	1.803651444552931	1.027349057127315	0.6233005512155947	0.07106915063274614	0.2774104043866394	18.43857627325035	13.41142322421292	30.62769853826149	8.417136107449041	1.138926328381787	2.221483367606277	0.3476968518714444	0.1912432969237246	49.0	0.0	0.0	0.0	0.0	3.436844450815274	0.0	4.955103423910219	0.0	0.0	1.11443882521887	4.0	0.0	0.0	0.0	0.0
987	train	11.9882948	0.0	0.0	0.0	0.7845	0.02802	0.403846154	9.0	8.0	9.0	0.473684211	1.64247077	3.843354621	5.056020968	5.056020968	5.056020968	85.40848006	199.8544403	0.8869528	4.057968948	1.857085097	0.849152548	0.849152548	0.849152548	15.71906522	40.62147848	40.62147848	26.52285614	26.52285614	0.125	0.0	0.0	215.0	3.663561646	4.189654742	4.744932128	5.283203729	4.202619414	0.461538462	4.0	0.0	1.0	0.0	0.0	0.0	1.0	0.0	0.0
[truncated: 7,744 more rows]
[truncated: 12 more columns]
