# Supplementary material for: A Novel Method for Predicting the Human Inherent Clearance and Its Application in the Study of the Pharmacokinetics and Drug–Drug Interaction between Azidothymidine and Fluconazole Mediated by UGT Enzyme
Source: Pharmaceutics. 2021 Oct 19;13(10):1734. doi: 10.3390/pharmaceutics13101734 (PMC8538957; doi:10.3390/pharmaceutics13101734)
Supplement: Supplementary file 1 [file pharmaceutics-13-01734-s001.zip › Supplementary Materials/Tables S2-S5.xlsx]

## Sheet: Talbe S2
Table S1, Microdialysis recovery of AZT, AZTG and FCZ
Compound	Concentration (μM)	Recovery (%)
AZT	200	5.49 ± 0.22
	500	7.22 ± 0.28
	1000	6.92 ± 0.23
Average	6.54±0.24
AZTG	20	16.65 ± 0.48
	50	15.13 ± 0.47
	100	17.58 ± 0.75
Average	16.45±0.56
FCZ	500	7.14 ± 0.35
	1000	4.35 ± 0.12
	2000	6.52 ± 0.13
Average	6.00±0.20
The zero net flux method was used to investigate the micro-dialysis recovery rates of AZT, AZTG and FCZ. The dialysis needle was embedded in the hydrogel and the perfusion speed was 1.6 μL/min. The AZT perfusion concentration was set to 50, 150, 250, 400, 800 and 1200 μM. Dialysis recovery was investigated at three concentration levels (200 μM, 500 μM 1000 μM) of AZT. Dialysate samples were conti…
The dialysis recovery rates of AZT and AZTG at three concentration levels were investigated respectively. The average recovery was calculated to correct the dialysis quantitative concentration in hydrogel in the Bio-PK system.

## Sheet: Table S3
Table S2, fu of AZT and FCZ in the HLM-Gel system
fu (%)		fu (%)
AZT-1	92.49	FCZ-1	82.53
AZT-2	93.93	FCZ-2	83.3
AZT-3	92.37	FCZ-3	82.16
Average	92.93		82.66
SD	0.87		0.58
The millipore centrifugal filter device (0.5mL, 3-kDa membrane, Millipore, Bedford, MA, USA) was used to determine the binding rate of the compound to HLM-Gel and BSA. The device included a reservoir and a filtrate compartment separated by a 3-kDa cellulose membrane. AZT was dissolved in the HLM-Gel incubation solution (500 μM, without starter UDPGA), and the sample was then incubated in a 37°C w…

## Sheet: Table S4
Table S3, Parameters for AZT and FCZ PBPK modeling
Compound	AZT	Reference/Database	FCZ	Reference/Database
MW (g/mol)	267.24	DrugBank	306.27	DrugBank
logPo:w	0.05	DrugBank	0.5	DrugBank
Compound type	Monoprotic Acid	Raviolo, M.A.; Briñón, M.C. Preformulation studies of Zidovudine derivatives: Acid dissociation constants, differential scanning calorimetry, thermogravimetry, x-ray powder diffractometry and aqueous stability studies. Scientia pharmaceutica 2011, 79, 479-491, doi:10.3797/scipharm.1105-04	Monoprotic Base	DrugBank
pKa	9.7	Raviolo, M.A.; Briñón, M.C. Preformulation studies of Zidovudine derivatives: Acid dissociation constants, differential scanning calorimetry, thermogravimetry, x-ray powder diffractometry and aqueous stability studies. Scientia pharmaceutica 2011, 79, 479-491, doi:10.3797/scipharm.1105-04	1.76	DrugBank
B/P	0.91	Simcyp	1	Zhao, W.; Le Guellec, C.; Benjamin, D.K., Jr.; Hope, W.W.; Bourgeois, T.; Watt, K.M.; van den Anker, J.N.; Matrot, B.; Saxen, H.; Hoppu, K.; et al. First dose in neonates: are juvenile mice, adults and in vitro-in silico data predictive of neonatal pharmacokinetics of fluconazole. Clinical pharmacokinetics 2014, 53, 1005-1018, doi:10.1007/s40262-014-0169-7.
fu	0.8	Luzier, A.; Morse, G.D. Intravascular distribution of zidovudine: role of plasma proteins and whole blood components. Antiviral research 1993, 21, 267-280, doi:10.1016/0166-3542(93)90032-e.	0.89	DrugBank
Absorption Model	1st order	Simcyp	ADAM
ka (1/h)	4.05	al, K.e. Phoenix estimate from reported oral absorption data in nonpregnant subjects (Klecker et al., 1987). . 1987.	-
Peff,man (10-4 cm/s)	-		4.3	Cristofoletti, R.; Charoo, N.A.; Dressman, J.B. Exploratory Investigation of the Limiting Steps of Oral Absorption of Fluconazole and Ketoconazole in Children Using an In Silico Pediatric Absorption Model. Journal of pharmaceutical sciences 2016, 105, 2794-2803, doi:10.1016/j.xphs.2016.01.027.
Distribution Model	Minimal PBPK Model	Simcyp	Full PBPK Model
Vss (L/kg)	1.04	Simcyp	-
Kp Scalar	-		1.3	Simcyp
CLR (L/h)	15.5	DrugBank	0.75	Ripa, S.; Ferrante, L.; Prenna, M. Pharmacokinetics of fluconazole in normal volunteers. Chemotherapy 1993, 39, 6-12, doi:10.1159/000238967.
CL(iv) (L/h)	-		1.01	Simcyp / DeMuria, D.; Forrest, A.; Rich, J.; Scavone, J.M.; Cohen, L.G.; Kazanjian, P.H. Pharmacokinetics and bioavailability of fluconazole in patients with AIDS. Antimicrobial agents and chemotherapy 1993, 37, 2187-2192, doi:10.1128/aac.37.10.2187.

## Sheet: Table S5
Table S4, In vitro metabolism parameters of AZT reported from literatures
Condition	Km(μM)	Vmax (pmol/min/mg microsomal protein)	CLint (μL/min/mg protein)	Reference
With BSA(HLM)	91 ± 9 μM	1166 ± 484	12.81	Uchaipichat, V.; Winner, L.K.; Mackenzie, P.I.; Elliot, D.J.; Williams, J.A.; Miners, J.O. Quantitative prediction of in vivo inhibitory interactions involving glucuronidated drugs from in vitro data: the effect of fluconazole on zidovudine glucuronidation. British journal of clinical pharmacology 2006, 61, 427-439, doi:10.1111/j.1365-2125.2006.02588.x.
Activated (Brij58), phosphate buffer 0.02 M	672	3960	5.89	Boase, S.; Miners, J.O. In vitro-in vivo correlations for drugs eliminated by glucuronidation: investigations with the model substrate zidovudine. British journal of clinical pharmacology 2002, 54, 493-503, doi:10.1046/j.1365-2125.2002.01669.x.
HLM	1400±170	530±21	0.38	Court, M.H.; Krishnaswamy, S.; Hao, Q.; Duan, S.X.; Patten, C.J.; Von Moltke, L.L.; Greenblatt, D.J. Evaluation of 3'-azido-3'-deoxythymidine, morphine, and codeine as probe substrates for UDP-glucuronosyltransferase 2B7 (UGT2B7) in human liver microsomes: specificity and influence of the UGT2B7*2 polymorphism. Drug metabolism and disposition: the biological fate of chemicals 2003, 31, 1125-1133,…
With 1% BSA	880± 50	1450± 26.05	1.65	Abdullah, N.H.; Ismail, S. Inhibition of UGT2B7 Enzyme Activity in Human and Rat Liver Microsomes by Herbal Constituents. Molecules (Basel, Switzerland) 2018, 23, 2696, doi:10.3390/molecules23102696.
Pooled HLM	4359±341.4	1180±530	0.27±0.02	Wang, L.; Hong, X.; Yao, Z.; Dai, Y.; Zhao, G.; Qin, Z.; Wu, B.; Gonzalez, F.J.; Yao, X. Glucuronidation of icaritin by human liver microsomes, human intestine microsomes and expressed UDP-glucuronosyltransferase enzymes: identification of UGT1A3, 1A9 and 2B7 as the main contributing enzymes. Xenobiotica; the fate of foreign compounds in biological systems 2018, 48, 357-367, doi:10.1080/00498254.…
Crude(2.0%)	87±2*	867±40	9.97	Rowland, A.; Gaganis, P.; Elliot, D.J.; Mackenzie, P.I.; Knights, K.M.; Miners, J.O. Binding of inhibitory fatty acids is responsible for the enhancement of UDP-glucuronosyltransferase 2B7 activity by albumin: implications for in vitro-in vivo extrapolation. The Journal of pharmacology and experimental therapeutics 2007, 321, 137-147, doi:10.1124/jpet.106.118216.
FAF(0.5%)	124±3*	859±6	6.93
GF(2.0%)	188±4*	715±54	3.8
FAFGF(2.0%)	136±6*	900±10	6.62
HLM	2225 ± 212	2155 ± 110	0.97	Mano, Y.; Usui, T.; Kamimura, H. Inhibitory potential of nonsteroidal anti-inflammatory drugs on UDP-glucuronosyltransferase 2B7 in human liver microsomes. European journal of clinical pharmacology 2007, 63, 211-216, doi:10.1007/s00228-006-0241-9.
HLMs	760± 70	1190±40	1.57
HLMs	760± 70	1190±40	1.57	Engtrakul, J.J.; Foti, R.S.; Strelevitz, T.J.; Fisher, M.B. Altered AZT (3'-azido-3'-deoxythymidine) glucuronidation kinetics in liver microsomes as an explanation for underprediction of in vivo clearance: comparison to hepatocytes and effect of incubation environment. Drug metabolism and disposition: the biological fate of chemicals 2005, 33, 1621-1627, doi:10.1124/dmd.105.005058.
BSA:bovine serum albumin
*：P <0.05 compared with incubations conducted without albumin.
FAF:fatty acid-free
GF:globulin- free
FAFGF:fatty acid- and globulin-free
